# Supplementary material for: Coherent heteroepitaxial growth of I-III-VI2 Ag(In,Ga)S2 colloidal nanocrystals with near-unity quantum yield for use in luminescent solar concentrators
Source: Nat Commun. 2023 Jun 24;14:3779. doi: 10.1038/s41467-023-39509-y (PMC10290649; doi:10.1038/s41467-023-39509-y)
Supplement: Supplementary file 4 — Source data [file 41467_2023_39509_MOESM4_ESM.xlsx]

## Sheet: Fig. 1
	Fig. 1b
		50 °C			130 °C
	m/z	intensity (a.u.)		m/z	intensity (a.u.)
	749.987	0.04538		749.987	1.12073
	750.006	0.03311		750.006	1.07141
	750.025	0.02734		750.025	1.0282
	750.043	0.02545		750.043	1.0141
	750.062	0.02127		750.062	1.00708
	750.081	0.01462		750.081	1.01239
	750.1	0.0123		750.1	1.00708
	750.119	0.01184		750.119	1
	750.137	0.01129		750.137	1
	750.156	0.0123		750.156	1
	750.175	0.01086		750.175	1.00177
	750.194	0.00809		750.194	1.00708
	750.212	0.01605		750.212	1.01941
	750.231	0.01892		750.231	1.02997
	750.25	0.01837		750.25	1.02118
	750.269	0.01318		750.269	1.00354
	750.287	0.01563		750.287	1.00354
	750.306	0.01563		750.306	1
	750.325	0.01273		750.325	1.00354
	750.344	0.01462		750.344	1
	750.362	0.02081		750.362	1
	750.381	0.02225		750.381	1
	750.4	0.01938		750.4	1
	750.419	0.0123		750.419	1
	750.438	0.00897		750.438	1
	750.456	0.01416		750.456	1.00177
	750.475	0.01892		750.475	1.00354
	750.494	0.01749		750.494	1.00177
	750.513	0.01373		750.513	1
	750.531	0.00897		750.531	1.00177
	750.55	0.01086		750.55	1
	750.569	0.01086		750.569	1.00177
	750.588	0.01129		750.588	1
	750.606	0.00855		750.606	1
	750.625	0.00998		750.625	1.00177
	750.644	0.01563		750.644	1
	750.663	0.0217		750.663	1.00177
	750.682	0.02646		750.682	1.00708
	750.7	0.0217		750.7	1.00708
	750.719	0.01651		750.719	1.00708
	750.738	0.034		750.738	1.00177
	750.757	0.05811		750.757	1.00177
	750.775	0.06088		750.775	1
	750.794	0.04627		750.794	1.00531
	750.813	0.03687		750.813	1.0141
	750.832	0.02692		750.832	1.0282
	750.85	0.02878		750.85	1.03174
	750.869	0.02692		750.869	1.02997
	750.888	0.02026		750.888	1.02118
	750.907	0.0217		750.907	1.00708
	750.926	0.03308		750.926	1.01239
	750.944	0.03772		750.944	1.03351
	750.963	0.04349		750.963	1.04761
	750.982	0.0383		750.982	1.05292
	751.001	0.02878		751.001	1.04938
	751.019	0.02835		751.019	1.03174
	751.038	0.02603		751.038	1.0141
	751.057	0.02026		751.057	1.01062
	751.076	0.01837		751.076	1.00885
	751.095	0.02268		751.095	1.00177
	751.113	0.02689		751.113	1.00879
	751.132	0.02545		751.132	1.01935
	751.151	0.02545		751.151	1.01935
	751.17	0.02081		751.17	1.00885
	751.188	0.01462		751.188	1
	751.207	0.02503		751.207	1
	751.226	0.02646		751.226	1.00177
	751.245	0.01837		751.245	1
	751.264	0.01273		751.264	1
	751.282	0.00855		751.282	1
	751.301	0.01462		751.301	1
	751.32	0.02414		751.32	1.00177
	751.339	0.02603		751.339	1
	751.357	0.02979		751.357	1.00177
	751.376	0.03442		751.376	1
	751.395	0.03442		751.395	1
	751.414	0.03067		751.414	1
	751.433	0.02835		751.433	1.00354
	751.451	0.02359		751.451	1.00531
	751.47	0.01563		751.47	1
	751.489	0.01419		751.489	1
	751.508	0.01517		751.508	1
	751.526	0.02414		751.526	1
	751.545	0.03021		751.545	1
	751.564	0.03165		751.564	1.00177
	751.583	0.02692		751.583	1
	751.602	0.02313		751.602	1.00177
	751.62	0.02545		751.62	1
	751.639	0.02832		751.639	1
	751.658	0.03729		751.658	1
	751.677	0.03641		751.677	1.00177
	751.695	0.02603		751.695	1
	751.714	0.01605		751.714	1.00177
	751.733	0.02359		751.733	1
	751.752	0.03311		751.752	1
	751.771	0.03919		751.771	1.00354
	751.789	0.02835		751.789	1.01941
	751.808	0.02457		751.808	1.03882
	751.827	0.03165		751.827	1.03882
	751.846	0.02933		751.846	1.00708
	751.865	0.02359		751.865	1
	751.883	0.02225		751.883	1
	751.902	0.04538		751.902	1.00702
	751.921	0.08356		751.921	1.01581
	751.94	0.11753		751.94	1.05286
	751.958	0.12372		751.958	1.13306
	751.977	0.09961		751.977	1.22907
	751.996	0.07041		751.996	1.25549
	752.015	0.05435		752.015	1.17621
	752.034	0.03543		752.034	1.07843
	752.052	0.03442		752.052	1.02295
	752.071	0.03354		752.071	1.00531
	752.09	0.02979		752.09	1.01062
	752.109	0.02457		752.109	1.01239
	752.128	0.02689		752.128	1.00531
	752.146	0.03253		752.146	1.00708
	752.165	0.04248		752.165	1.00354
	752.184	0.04294		752.184	1.01233
	752.203	0.02878		752.203	1.01935
	752.221	0.02127		752.221	1.01239
	752.24	0.01273		752.24	1.00177
	752.259	0.01318		752.259	1.00177
	752.278	0.01749		752.278	1.00177
	752.297	0.0217		752.297	1.00354
	752.315	0.02646		752.315	1.00708
	752.334	0.02359		752.334	1.00177
	752.353	0.02225		752.353	1.00177
	752.372	0.02225		752.372	1.00177
	752.391	0.01938		752.391	1.00708
	752.409	0.01129		752.409	1.01587
	752.428	0.00711		752.428	1.01941
	752.447	0.01184		752.447	1.01239
	752.466	0.01703		752.466	1.0141
	752.485	0.02499		752.485	1.0141
	752.503	0.026		752.503	1.00531
	752.522	0.02127		752.522	1.00177
	752.541	0.01749		752.541	1.00354
	752.56	0.02225		752.56	1.00354
	752.579	0.02646		752.579	1
	752.597	0.02646		752.597	1
	752.616	0.02026		752.616	1
	752.635	0.01563		752.635	1
	752.654	0.01651		752.654	1.00354
	752.673	0.01794		752.673	1
	752.691	0.01651		752.691	1
	752.71	0.02225		752.71	1
	752.729	0.02689		752.729	1.00531
	752.748	0.02976		752.748	1.00177
	752.766	0.03961		752.766	1.00354
	752.785	0.05997		752.785	1.01056
	752.804	0.05622		752.804	1.0141
	752.823	0.03543		752.823	1.00531
	752.842	0.02026		752.842	1.00177
	752.86	0.02457		752.86	1.00531
	752.879	0.0383		752.879	1.0141
	752.898	0.05191		752.898	1.0141
	752.917	0.07459		752.917	1.00531
	752.936	0.09915		752.936	1.01587
	752.954	0.11942		752.954	1.04761
	752.973	0.11621		752.973	1.08728
	752.992	0.10147		752.992	1.11542
	753.011	0.07129		753.011	1.07843
	753.03	0.0383		753.03	1.03528
	753.048	0.02503		753.048	1.00177
	753.067	0.02225		753.067	1.00177
	753.086	0.02878		753.086	1.00531
	753.105	0.02603		753.105	1.00354
	753.124	0.01563		753.124	1.00177
	753.142	0.0123		753.142	1.00177
	753.161	0.01041		753.161	1
	753.18	0.00943		753.18	1
	753.199	0.01086		753.199	1.00177
	753.218	0.01706		753.218	1.00177
	753.236	0.01837		753.236	1.00177
	753.255	0.01563		753.255	1.00177
	753.274	0.02225		753.274	1.00177
	753.293	0.02545		753.293	1
	753.312	0.026		753.312	1
	753.33	0.02878		753.33	1.00177
	753.349	0.02835		753.349	1.00354
	753.368	0.02127		753.368	1.00531
	753.387	0.01651		753.387	1.00531
	753.406	0.01895		753.406	1
	753.424	0.02603		753.424	1
	753.443	0.03775		753.443	1
	753.462	0.05148		753.462	1
	753.481	0.0477		753.481	1
	753.5	0.03354		753.5	1.00177
	753.519	0.02878		753.519	1
	753.537	0.01938		753.537	1
	753.556	0.01938		753.556	1
	753.575	0.02789		753.575	1
	753.594	0.02503		753.594	1
	753.613	0.01563		753.613	1
	753.631	0.01184		753.631	1.00354
	753.65	0.01462		753.65	1.00177
	753.669	0.02313		753.669	1
	753.688	0.03067		753.688	1.00177
	753.707	0.03067		753.707	1
	753.725	0.02646		753.725	1.00531
	753.744	0.04062		753.744	1.01062
	753.763	0.06		753.763	1.02472
	753.782	0.06983		753.782	1.03174
	753.801	0.06375		753.801	1.01587
	753.819	0.04538		753.819	1.01239
	753.838	0.03122		753.838	1.0141
	753.857	0.02359		753.857	1.01239
	753.876	0.01984		753.876	1.00354
	753.895	0.02225		753.895	1.02118
	753.913	0.026		753.913	1.03174
	753.932	0.04151		753.932	1.03705
	753.951	0.05524		753.951	1.0661
	753.97	0.06375		753.97	1.20441
	753.989	0.06519		753.989	1.36389
	754.008	0.05811		754.008	1.3833
	754.026	0.04108		754.026	1.27136
	754.045	0.03311		754.045	1.11896
	754.064	0.03354		754.064	1.04407
	754.083	0.02127		754.083	1.04584
	754.102	0.00809		754.102	1.03351
	754.12	0.00809		754.12	1.0282
	754.139	0.01041		754.139	1.02295
	754.158	0.01706		754.158	1.00354
	754.177	0.01984		754.177	1.00354
	754.196	0.02359		754.196	1
	754.214	0.03122		754.214	1.00354
	754.233	0.02734		754.233	1.00885
	754.252	0.01895		754.252	1.01239
	754.271	0.01706		754.271	1.01587
	754.29	0.01563		754.29	1.00885
	754.309	0.01749		754.309	1.00354
	754.327	0.01749		754.327	1.00531
	754.346	0.01129		754.346	1.00177
	754.365	0.01086		754.365	1.00354
	754.384	0.01419		754.384	1
	754.403	0.01563		754.403	1.00177
	754.421	0.02127		754.421	1.01233
	754.44	0.02503		754.44	1.0282
	754.459	0.01794		754.459	1.02295
	754.478	0.0123		754.478	1.00354
	754.497	0.00754		754.497	1
	754.516	0.00754		754.516	1.00531
	754.534	0.01086		754.534	1.00885
	754.553	0.01419		754.553	1.00708
	754.572	0.01462		754.572	1.00177
	754.591	0.01184		754.591	1
	754.61	0.00809		754.61	1.00177
	754.628	0.0061		754.628	1
	754.647	0.00565		754.647	1.00354
	754.666	0.00995		754.666	1
	754.685	0.02078		754.685	1.00177
	754.704	0.02832		754.704	1
	754.723	0.02976		754.723	1
	754.741	0.03961		754.741	1.00177
	754.76	0.05622		754.76	1.0141
	754.779	0.06894		754.779	1.01239
	754.798	0.06662		754.798	1.01239
	754.817	0.05335		754.817	1.00354
	754.835	0.03067		754.835	1.00708
	754.854	0.034		754.854	1
	754.873	0.034		754.873	1.00531
	754.892	0.02979		754.892	1.00354
	754.911	0.02225		754.911	1.01233
	754.93	0.02414		754.93	1.01764
	754.948	0.03311		754.948	1.03174
	754.967	0.04913		754.967	1.05902
	754.986	0.05432		754.986	1.14185
	755.005	0.05951		755.005	1.21497
	755.024	0.05057		755.024	1.22199
	755.043	0.03122		755.043	1.1366
	755.061	0.01605		755.061	1.06787
	755.08	0.01651		755.08	1.03351
	755.099	0.02127		755.099	1.01764
	755.118	0.02414		755.118	1.01941
	755.137	0.01895		755.137	1.01062
	755.155	0.00754		755.155	1.00177
	755.174	0.00189		755.174	1
	755.193	0.00378		755.193	1
	755.212	0.00809		755.212	1
	755.231	0.01794		755.231	1.00531
	755.25	0.02414		755.25	1.02118
	755.268	0.03543		755.268	1.02997
	755.287	0.0383		755.287	1.03351
	755.306	0.02646		755.306	1.03351
	755.325	0.00897		755.325	1.0423
	755.344	0.01086		755.344	1.02997
	755.363	0.02026		755.363	1.00531
	755.381	0.02789		755.381	1.00177
	755.4	0.02503		755.4	1
	755.419	0.02081		755.419	1.00177
	755.438	0.02457		755.438	1.00177
	755.457	0.02878		755.457	1.00177
	755.476	0.03067		755.476	1.00708
	755.494	0.02545		755.494	1.01062
	755.513	0.02646		755.513	1.00708
	755.532	0.02313		755.532	1.00354
	755.551	0.02026		755.551	1
	755.57	0.02503		755.57	1.00177
	755.589	0.02271		755.589	1.00354
	755.607	0.02271		755.607	1.00531
	755.626	0.0217		755.626	1.0141
	755.645	0.02545		755.645	1.00885
	755.664	0.02081		755.664	1.00531
	755.683	0.01373		755.683	1.00531
	755.702	0.01462		755.702	1
	755.72	0.03067		755.72	1
	755.739	0.07083		755.739	1.00879
	755.758	0.13788		755.758	1.01758
	755.777	0.20582		755.777	1.03522
	755.796	0.25684		755.796	1.04224
	755.815	0.23847		755.815	1.05457
	755.833	0.15293		755.833	1.0423
	755.852	0.07504		755.852	1.04059
	755.871	0.04395		755.871	1.0282
	755.89	0.04627		755.89	1.01062
	755.909	0.04395		755.909	1.00354
	755.928	0.03919		755.928	1.00531
	755.946	0.04584		755.946	1.01764
	755.965	0.06796		755.965	1.04053
	755.984	0.08457		755.984	1.0943
	756.003	0.06421		756.003	1.18506
	756.022	0.04019		756.022	1.25726
	756.041	0.03122		756.041	1.22382
	756.059	0.02081		756.059	1.14014
	756.078	0.01651		756.078	1.07141
	756.097	0.01086		756.097	1.03528
	756.116	0.00809		756.116	1.02118
	756.135	0.01462		756.135	1.01062
	756.154	0.01749		756.154	1.00531
	756.172	0.01706		756.172	1.00354
	756.191	0.01984		756.191	1.00354
	756.21	0.02081		756.21	1.00354
	756.229	0.02734		756.229	1
	756.248	0.02545		756.248	1
	756.267	0.02734		756.267	1.00177
	756.285	0.02692		756.285	1.00354
	756.304	0.02271		756.304	1
	756.323	0.01462		756.323	1
	756.342	0.01273		756.342	1
	756.361	0.01184		756.361	1
	756.38	0.01559		756.38	1
	756.399	0.01892		756.399	1.00177
	756.417	0.01749		756.417	1.00177
	756.436	0.01892		756.436	1
	756.455	0.026		756.455	1
	756.474	0.03586		756.474	1.00177
	756.493	0.03497		756.493	1.00177
	756.512	0.03543		756.512	1
	756.53	0.03256		756.53	1
	756.549	0.02081		756.549	1.00354
	756.568	0.01794		756.568	1.00531
	756.587	0.02271		756.587	1
	756.606	0.02603		756.606	1.00177
	756.625	0.03122		756.625	1.00354
	756.643	0.03122		756.643	1.00708
	756.662	0.02878		756.662	1.00354
	756.681	0.02545		756.681	1.00177
	756.7	0.01984		756.7	1
	756.719	0.01895		756.719	1
	756.738	0.03122		756.738	1.00177
	756.757	0.05103		756.757	1.00531
	756.775	0.07935		756.775	1.02295
	756.794	0.10291		756.794	1.03705
	756.813	0.09818		756.813	1.04761
	756.832	0.06851		756.832	1.03705
	756.851	0.04672		756.851	1.01764
	756.87	0.02646		756.87	1.01764
	756.888	0.02692		756.888	1.01587
	756.907	0.03067		756.907	1.01062
	756.926	0.034		756.926	1.00177
	756.945	0.04151		756.945	1.00531
	756.964	0.04437		756.964	1.02643
	756.983	0.02878		756.983	1.05463
	757.002	0.01651		757.002	1.07135
	757.02	0.02414		757.02	1.09076
	757.039	0.02979		757.039	1.11542
	757.058	0.02503		757.058	1.08197
	757.077	0.01895		757.077	1.01941
	757.096	0.01462		757.096	1
	757.115	0.01563		757.115	1.00177
	757.134	0.01984		757.134	1.00177
	757.152	0.01895		757.152	1.00531
	757.171	0.01706		757.171	1.00708
	757.19	0.01837		757.19	1.00708
	757.209	0.01563		757.209	1.00354
	757.228	0.01517		757.228	1.00354
	757.247	0.02313		757.247	1.00354
	757.265	0.02503		757.265	1.00531
	757.284	0.02545		757.284	1.00177
	757.303	0.02313		757.303	1
	757.322	0.01563		757.322	1
	757.341	0.01129		757.341	1
	757.36	0.01416		757.36	1
	757.379	0.02124		757.379	1
	757.397	0.02356		757.397	1.00177
	757.416	0.01651		757.416	1
	757.435	0.0123		757.435	1.00354
	757.454	0.01563		757.454	1.00531
	757.473	0.02271		757.473	1.00354
	757.492	0.02225		757.492	1.00531
	757.511	0.02081		757.511	1.01062
	757.529	0.01373		757.529	1.01062
	757.548	0.01837		757.548	1.00885
	757.567	0.02789		757.567	1.01764
	757.586	0.02933		757.586	1.01587
	757.605	0.02503		757.605	1
	757.624	0.01563		757.624	1
	757.643	0.01129		757.643	1
	757.661	0.01184		757.661	1
	757.68	0.02081		757.68	1
	757.699	0.02313		757.699	1
	757.718	0.02026		757.718	1.00177
	757.737	0.01706		757.737	1
	757.756	0.02603		757.756	1.00177
	757.775	0.06143		757.775	1.00354
	757.793	0.09684		757.793	1.01587
	757.812	0.09818		757.812	1.02289
	757.831	0.06708		757.831	1.01587
	757.85	0.03354		757.85	1.00177
	757.869	0.02603		757.869	1
	757.888	0.01895		757.888	1.00531
	757.907	0.01462		757.907	1.00885
	757.925	0.01318		757.925	1.00885
	757.944	0.02081		757.944	1.01239
	757.963	0.02313		757.963	1.02649
	757.982	0.01563		757.982	1.01941
	758.001	0.00665		758.001	1.0282
	758.02	0.00897		758.02	1.05725
	758.039	0.01041		758.039	1.07837
	758.057	0.00943		758.057	1.05286
	758.076	0.00809		758.076	1.0282
	758.095	0.00711		758.095	1.00177
	758.114	0.0123		758.114	1.00177
	758.133	0.01419		758.133	1.00177
	758.152	0.01318		758.152	1
	758.171	0.01086		758.171	1
	758.19	0.01041		758.19	1
	758.208	0.01605		758.208	1.00354
	758.227	0.01794		758.227	1.01056
	758.246	0.01462		758.246	1.02289
	758.265	0.0061		758.265	1.01941
	758.284	0.00754		758.284	1.00708
	758.303	0.01086		758.303	1
	758.322	0.01706		758.322	1
	758.34	0.02545		758.34	1
	758.359	0.02976		758.359	1.00177
	758.378	0.02503		758.378	1
	758.397	0.01938		758.397	1
	758.416	0.02313		758.416	1
	758.435	0.02313		758.435	1
	758.454	0.01651		758.454	1
	758.472	0.02313		758.472	1.00354
	758.491	0.02503		758.491	1.00708
	758.51	0.02646		758.51	1.01062
	758.529	0.02271		758.529	1.00531
	758.548	0.01984		758.548	1.00177
	758.567	0.01749		758.567	1
	758.586	0.01419		758.586	1.00177
	758.605	0.01419		758.605	1
	758.623	0.01837		758.623	1
	758.642	0.02026		758.642	1
	758.661	0.01563		758.661	1.00177
	758.68	0.01129		758.68	1
	758.699	0.01517		758.699	1
	758.718	0.0217		758.718	1.00531
	758.737	0.026		758.737	1.01233
	758.756	0.03207		758.756	1.01764
	758.774	0.03122		758.774	1.02118
	758.793	0.02878		758.793	1.01239
	758.812	0.02603		758.812	1.00354
	758.831	0.03311		758.831	1.00531
	758.85	0.02603		758.85	1
	758.869	0.01938		758.869	1.00354
	758.888	0.02359		758.888	1.0141
	758.907	0.02933		758.907	1.02112
	758.925	0.01984		758.925	1.0141
	758.944	0.01041		758.944	1.00885
	758.963	0.0061		758.963	1.01941
	758.982	0.01273		758.982	1.02997
	759.001	0.01981		759.001	1.0282
	759.02	0.02499		759.02	1.0423
	759.039	0.01984		759.039	1.05109
	759.057	0.00711		759.057	1.06781
	759.076	0.00665		759.076	1.05115
	759.095	0.00998		759.095	1.01941
	759.114	0.02313		759.114	1.01062
	759.133	0.02789		759.133	1.00177
	759.152	0.02603		759.152	1
	759.171	0.01837		759.171	1.00354
	759.19	0.0061		759.19	1
	759.208	0.00565		759.208	1.00531
	759.227	0.01318		759.227	1.01062
	759.246	0.01938		759.246	1.0141
	759.265	0.02225		759.265	1.01062
	759.284	0.01706		759.284	1.00885
	759.303	0.01129		759.303	1.00531
	759.322	0.01041		759.322	1.00708
	759.341	0.01749		759.341	1.00354
	759.36	0.03354		759.36	1
	759.378	0.04437		759.378	1
	759.397	0.04019		759.397	1
	759.416	0.02933		759.416	1.00177
	759.435	0.02359		759.435	1.00354
	759.454	0.02313		759.454	1
	759.473	0.02457		759.473	1.00879
	759.492	0.03497		759.492	1.00879
	759.511	0.04251		759.511	1.00708
	759.529	0.0383		759.529	1.00177
	759.548	0.03165		759.548	1
	759.567	0.03211		759.567	1
	759.586	0.02692		759.586	1.00354
	759.605	0.01938		759.605	1.00708
	759.624	0.01041		759.624	1.00354
	759.643	0.00333		759.643	1.00708
	759.662	0.00421		759.662	1.00708
	759.68	0.01184		759.68	1
	759.699	0.01648		759.699	1.00177
	759.718	0.01605		759.718	1.00354
	759.737	0.01273		759.737	1.00531
	759.756	0.01559		759.756	1.00354
	759.775	0.02356		759.775	1
	759.794	0.03351		759.794	1
	759.813	0.03684		759.813	1.00177
	759.832	0.03256		759.832	1.00531
	759.85	0.02225		759.85	1.01587
	759.869	0.01651		759.869	1.02289
	759.888	0.01794		759.888	1.01941
	759.907	0.02878		759.907	1.01239
	759.926	0.03919		759.926	1.01062
	759.945	0.04349		759.945	1
	759.964	0.02545		759.964	1
	759.983	0.01419		759.983	1
	760.002	0.01318		760.002	1
	760.02	0.01706		760.02	1
	760.039	0.02127		760.039	1.01056
	760.058	0.01462		760.058	1.00708
	760.077	0.01086		760.077	1
	760.096	0.00897		760.096	1.00177
	760.115	0.01318		760.115	1.01056
	760.134	0.01794		760.134	1.01233
	760.153	0.01273		760.153	1.00708
	760.172	0.00998		760.172	1.00177
	760.19	0.00897		760.19	1
	760.209	0.01749		760.209	1.00177
	760.228	0.02689		760.228	1
	760.247	0.03064		760.247	1
	760.266	0.02081		760.266	1
	760.285	0.00809		760.285	1.00702
	760.304	0.0061		760.304	1.01935
	760.323	0.00711		760.323	1.02112
	760.341	0.01373		760.341	1.00708
	760.36	0.01938		760.36	1.00531
	760.379	0.02457		760.379	1.00708
	760.398	0.03165		760.398	1.00708
	760.417	0.03308		760.417	1.00177
	760.436	0.02979		760.436	1
	760.455	0.02789		760.455	1
	760.474	0.03442		760.474	1.00177
	760.493	0.02878		760.493	1.00354
	760.512	0.02457		760.512	1
	760.53	0.02933		760.53	1.00354
	760.549	0.01895		760.549	1.00708
	760.568	0.00943		760.568	1.0141
	760.587	0.01373		760.587	1.00708
	760.606	0.01462		760.606	1
	760.625	0.01706		760.625	1
	760.644	0.02081		760.644	1
	760.663	0.02545		760.663	1
	760.682	0.03165		760.682	1.00177
	760.7	0.03442		760.7	1
	760.719	0.03021		760.719	1.00177
	760.738	0.02225		760.738	1
	760.757	0.01517		760.757	1.00702
	760.776	0.026		760.776	1.00879
	760.795	0.03442		760.795	1.00879
	760.814	0.034		760.814	1.00177
	760.833	0.02225		760.833	1.00708
	760.852	0.0123		760.852	1.02118
	760.871	0.01318		760.871	1.02295
	760.889	0.02503		760.889	1.01239
	760.908	0.03543		760.908	1.00177
	760.927	0.04538		760.927	1.00177
	760.946	0.0477		760.946	1.00879
	760.965	0.04727		760.965	1.01233
	760.984	0.03687		760.984	1.00177
	761.003	0.02646		761.003	1
	761.022	0.02271		761.022	1.00879
	761.041	0.02081		761.041	1.0141
	761.06	0.01938		761.06	1.01239
	761.078	0.01373		761.078	1
	761.097	0.01373		761.097	1.00177
	761.116	0.01749		761.116	1.00354
	761.135	0.01706		761.135	1.00354
	761.154	0.01605		761.154	1.00354
	761.173	0.01041		761.173	1
	761.192	0.00754		761.192	1
	761.211	0.00855		761.211	1.00177
	761.23	0.01086		761.23	1.00708
	761.249	0.0123		761.249	1.0141
	761.267	0.00998		761.267	1.02466
	761.286	0.00943		761.286	1.04053
	761.305	0.01419		761.305	1.03174
	761.324	0.01318		761.324	1.00885
	761.343	0.02026		761.343	1
	761.362	0.02646		761.362	1
	761.381	0.03775		761.381	1.00177
	761.4	0.03641		761.4	1.00177
	761.419	0.03586		761.419	1
	761.438	0.02835		761.438	1
	761.456	0.02414		761.456	1.00354
	761.475	0.01651		761.475	1.00531
	761.494	0.01041		761.494	1.01062
	761.513	0.01706		761.513	1.01062
	761.532	0.02503		761.532	1.00531
	761.551	0.02878		761.551	1
	761.57	0.02545		761.57	1
	761.589	0.02359		761.589	1
	761.608	0.02457		761.608	1.00177
	761.627	0.02503		761.627	1.00177
	761.646	0.01938		761.646	1
	761.664	0.02457		761.664	1
	761.683	0.03021		761.683	1.00177
	761.702	0.02933		761.702	1
	761.721	0.02646		761.721	1.00177
	761.74	0.02692		761.74	1
	761.759	0.03311		761.759	1
	761.778	0.02789		761.778	1
	761.797	0.01895		761.797	1
	761.816	0.01651		761.816	1
	761.835	0.02414		761.835	1.00177
	761.854	0.0217		761.854	1
	761.872	0.01837		761.872	1.00354
	761.891	0.02414		761.891	1.00708
	761.91	0.034		761.91	1.01764
	761.929	0.04294		761.929	1.02466
	761.948	0.05057		761.948	1.03168
	761.967	0.05289		761.967	1.04053
	761.986	0.05103		761.986	1.05109
	762.005	0.03021		762.005	1.06256
	762.024	0.0123		762.024	1.04938
	762.043	0.00855		762.043	1.01941
	762.062	0.0123		762.062	1.00177
	762.08	0.01749		762.08	1
	762.099	0.01837		762.099	1
	762.118	0.01892		762.118	1
	762.137	0.01837		762.137	1
	762.156	0.01318		762.156	1.00177
	762.175	0.00943		762.175	1.00177
	762.194	0.00711		762.194	1.00708
	762.213	0.00476		762.213	1.0141
	762.232	0.00565		762.232	1.00708
	762.251	0.01416		762.251	1.00177
	762.27	0.01837		762.27	1
	762.288	0.01981		762.288	1.00177
	762.307	0.01605		762.307	1
	762.326	0.01938		762.326	1.00177
	762.345	0.02545		762.345	1
	762.364	0.02789		762.364	1
	762.383	0.02646		762.383	1.00354
	762.402	0.02503		762.402	1.01233
	762.421	0.0217		762.421	1.01233
	762.44	0.02313		762.44	1.00354
	762.459	0.02359		762.459	1.00531
	762.478	0.02933		762.478	1.00177
	762.497	0.03021		762.497	1
	762.515	0.02414		762.515	1
	762.534	0.02081		762.534	1
	762.553	0.01462		762.553	1.00531
	762.572	0.01938		762.572	1.00531
	762.591	0.03021		762.591	1.00708
	762.61	0.02692		762.61	1.00354
	762.629	0.01651		762.629	1
	762.648	0.00565		762.648	1
	762.667	0.00146		762.667	1
	762.686	0.01129		762.686	1
	762.705	0.02081		762.705	1.00177
	762.724	0.02313		762.724	1.00531
	762.742	0.01794		762.742	1.01233
	762.761	0.00897		762.761	1.01062
	762.78	0.0061		762.78	1.00177
	762.799	0.00943		762.799	1
	762.818	0.01273		762.818	1
	762.837	0.01703		762.837	1
	762.856	0.01318		762.856	1.00177
	762.875	0.01605		762.875	1.00177
	762.894	0.02225		762.894	1.00708
	762.913	0.03021		762.913	1.00531
	762.932	0.03497		762.932	1.00708
	762.951	0.03211		762.951	1.02118
	762.97	0.02127		762.97	1.0661
	762.988	0.0123		762.988	1.07141
	763.007	0.01938		763.007	1.04761
	763.026	0.02313		763.026	1.01062
	763.045	0.01129		763.045	1
	763.064	0.0061		763.064	1.00177
	763.083	0.00754		763.083	1.00354
	763.102	0.01462		763.102	1.00354
	763.121	0.02081		763.121	1.00708
	763.14	0.01706		763.14	1.00885
	763.159	0.01605		763.159	1
	763.178	0.01373		763.178	1.00177
	763.197	0.0061		763.197	1
	763.216	0.00943		763.216	1
	763.235	0.01938		763.235	1.00177
	763.253	0.01794		763.253	1
	763.272	0.00943		763.272	1
	763.291	0.01041		763.291	1.00879
	763.31	0.00855		763.31	1.0141
	763.329	0.0123		763.329	1.01239
	763.348	0.01794		763.348	1.00531
	763.367	0.02457		763.367	1.01062
	763.386	0.026		763.386	1.01062
	763.405	0.01837		763.405	1.00177
	763.424	0.00809		763.424	1
	763.443	0.00522		763.443	1.00177
	763.462	0.00711		763.462	1.00177
	763.481	0.00711		763.481	1.00177
	763.499	0.01373		763.499	1
	763.518	0.02359		763.518	1
	763.537	0.02789		763.537	1
	763.556	0.01938		763.556	1
	763.575	0.0123		763.575	1
	763.594	0.01462		763.594	1.00177
	763.613	0.02081		763.613	1.00354
	763.632	0.02646		763.632	1.00708
	763.651	0.02789		763.651	1.00177
	763.67	0.02271		763.67	1
	763.689	0.00998		763.689	1
	763.708	0.00711		763.708	1
	763.727	0.00754		763.727	1.00354
	763.746	0.01517		763.746	1.00177
	763.765	0.02689		763.765	1.00531
	763.783	0.02976		763.783	1.01233
	763.802	0.01984		763.802	1.00708
	763.821	0.02271		763.821	1
	763.84	0.02603		763.84	1
	763.859	0.0217		763.859	1
	763.878	0.02414		763.878	1.00531
	763.897	0.04395		763.897	1.01941
	763.916	0.07083		763.916	1.03174
	763.935	0.09253		763.935	1.07141
	763.954	0.08643		763.954	1.1648
	763.973	0.07504		763.973	1.26965
	763.992	0.06421		763.992	1.22913
	764.011	0.04019		764.011	1.11896
	764.03	0.03497		764.03	1.03351
	764.049	0.02692		764.049	1.04407
	764.067	0.02225		764.067	1.0423
	764.086	0.02081		764.086	1.01941
	764.105	0.01373		764.105	1.01239
	764.124	0.01184		764.124	1.00708
	764.143	0.0123		764.143	1.00531
	764.162	0.01605		764.162	1.00177
	764.181	0.01129		764.181	1
	764.2	0.00711		764.2	1
	764.219	0.00809		764.219	1
	764.238	0.0061		764.238	1.00177
	764.257	0.00476		764.257	1.00177
	764.276	0.00754		764.276	1
	764.295	0.01318		764.295	1.00177
	764.314	0.02271		764.314	1
	764.333	0.03165		764.333	1.00177
	764.352	0.04151		764.352	1
	764.371	0.04727		764.371	1.00177
	764.389	0.03586		764.389	1.00177
	764.408	0.01794		764.408	1.00531
	764.427	0.02026		764.427	1.00708
	764.446	0.03354		764.446	1.00708
	764.465	0.03497		764.465	1.00177
	764.484	0.02646		764.484	1.01056
	764.503	0.01749		764.503	1.00531
	764.522	0.0123		764.522	1.00177
	764.541	0.01373		764.541	1.00354
	764.56	0.01129		764.56	1.00177
	764.579	0.01416		764.579	1.00354
	764.598	0.02313		764.598	1
	764.617	0.03442		764.617	1
	764.636	0.0383		764.636	1.00177
	764.655	0.02734		764.655	1.00177
	764.674	0.01837		764.674	1
	764.693	0.00998		764.693	1
	764.711	0.01462		764.711	1
	764.73	0.01749		764.73	1
	764.749	0.01706		764.749	1.00177
	764.768	0.02503		764.768	1
	764.787	0.02545		764.787	1
	764.806	0.01462		764.806	1.00177
	764.825	0.01706		764.825	1
	764.844	0.02081		764.844	1.00177
	764.863	0.02457		764.863	1.00879
	764.882	0.02313		764.882	1.01758
	764.901	0.026		764.901	1.01587
	764.92	0.03641		764.92	1.01062
	764.939	0.05622		764.939	1.03351
	764.958	0.06473		764.958	1.08374
	764.977	0.06088		764.977	1.15949
	764.996	0.0506		764.996	1.17096
	765.015	0.03442		765.015	1.1225
	765.034	0.0217		765.034	1.05908
	765.053	0.01563		765.053	1.02997
	765.071	0.02313		765.071	1.00354
	765.09	0.02359		765.09	1.00885
	765.109	0.01373		765.109	1.01239
	765.128	0.0123		765.128	1.01062
	765.147	0.01373		765.147	1.00177
	765.166	0.01419		765.166	1.00177
	765.185	0.01273		765.185	1
	765.204	0.02124		765.204	1
	765.223	0.01837		765.223	1.00354
	765.242	0.01318		765.242	1
	765.261	0.01605		765.261	1.00354
	765.28	0.02832		765.28	1
	765.299	0.04147		765.299	1.00177
	765.318	0.03729		765.318	1
	765.337	0.02545		765.337	1.00177
	765.356	0.03308		765.356	1.00177
	765.375	0.0477		765.375	1.00177
	765.394	0.04959		765.394	1
	765.413	0.03641		765.413	1
	765.432	0.02692		765.432	1
	765.451	0.03122		765.451	1.00702
	765.469	0.02692		765.469	1.01581
	765.488	0.01794		765.488	1.02466
	765.507	0.02127		765.507	1.02295
	765.526	0.02646		765.526	1.01764
	765.545	0.01984		765.545	1.00708
	765.564	0.01517		765.564	1
	765.583	0.01706		765.583	1
	765.602	0.02313		765.602	1
	765.621	0.02878		765.621	1
	765.64	0.02457		765.64	1.00354
	765.659	0.01895		765.659	1.00177
	765.678	0.01651		765.678	1.00354
	765.697	0.01129		765.697	1
	765.716	0.01041		765.716	1.00177
	765.735	0.02026		765.735	1
	765.754	0.03311		765.754	1.00177
	765.773	0.03641		765.773	1.01056
	765.792	0.02789		765.792	1.03168
	765.811	0.02646		765.811	1.04224
	765.83	0.0217		765.83	1.03528
	765.849	0.02127		765.849	1.00885
	765.868	0.03021		765.868	1.00177
	765.886	0.0354		765.886	1
	765.905	0.03916		765.905	1.00354
	765.924	0.04392		765.924	1.01056
	765.943	0.06272		765.943	1.06781
	765.962	0.0802		765.962	1.16473
	765.981	0.08783		765.981	1.30219
	766	0.07602		766	1.39203
	766.019	0.05002		766.019	1.45105
	766.038	0.02979		766.038	1.4176
	766.057	0.01895		766.057	1.20972
	766.076	0.01794		766.076	1.05115
	766.095	0.0217		766.095	1.02118
	766.114	0.02271		766.114	1.00885
	766.133	0.02414		766.133	1.01587
	766.152	0.0217		766.152	1.00708
	766.171	0.01651		766.171	1.00354
	766.19	0.01373		766.19	1.00708
	766.209	0.01462		766.209	1.00708
	766.228	0.01651		766.228	1.00177
	766.247	0.01273		766.247	1.00177
	766.266	0.00754		766.266	1.00708
	766.285	0.00897		766.285	1
	766.304	0.01416		766.304	1
	766.323	0.02268		766.323	1.00354
	766.342	0.02457		766.342	1.00177
	766.361	0.01794		766.361	1.00879
	766.38	0.01651		766.38	1.01056
	766.398	0.01749		766.398	1.01056
	766.417	0.01794		766.417	1.00885
	766.436	0.02225		766.436	1.0141
	766.455	0.026		766.455	1.02289
	766.474	0.03165		766.474	1.02289
	766.493	0.03641		766.493	1.02643
	766.512	0.03311		766.512	1.02118
	766.531	0.01749		766.531	1.01764
	766.55	0.01129		766.55	1.00708
	766.569	0.01462		766.569	1.00708
	766.588	0.01462		766.588	1.0141
	766.607	0.02026		766.607	1.01239
	766.626	0.02503		766.626	1.00531
	766.645	0.02545		766.645	1.00177
	766.664	0.02225		766.664	1
	766.683	0.02979		766.683	1.00177
	766.702	0.03311		766.702	1.00354
	766.721	0.02414		766.721	1
	766.74	0.02545		766.74	1
	766.759	0.02545		766.759	1.00177
	766.778	0.02225		766.778	1
	766.797	0.02545		766.797	1
	766.816	0.03122		766.816	1.00177
	766.835	0.04151		766.835	1.00177
	766.854	0.04538		766.854	1.00708
	766.873	0.04062		766.873	1.01062
	766.892	0.03442		766.892	1.00354
	766.911	0.02979		766.911	1
	766.93	0.04294		766.93	1.01587
	766.949	0.06519		766.949	1.0661
	766.968	0.06565		766.968	1.1648
	766.987	0.03876		766.987	1.28284
	767.006	0.02313		767.006	1.36212
	767.024	0.01984		767.024	1.35333
	767.043	0.01794		767.043	1.26611
	767.062	0.01895		767.062	1.15424
	767.081	0.01373		767.081	1.0423
	767.1	0.01794		767.1	1.01062
	767.119	0.02026		767.119	1.01764
	767.138	0.01517		767.138	1.01587
	767.157	0.01706		767.157	1.01239
	767.176	0.02414		767.176	1.00354
	767.195	0.02127		767.195	1.00354
	767.214	0.01837		767.214	1
	767.233	0.01318		767.233	1.00177
	767.252	0.02026		767.252	1.00177
	767.271	0.02603		767.271	1.00354
	767.29	0.02026		767.29	1.00531
	767.309	0.0123		767.309	1.00531
	767.328	0.02026		767.328	1.00531
	767.347	0.03021		767.347	1.01233
	767.366	0.02979		767.366	1.01764
	767.385	0.02646		767.385	1.01587
	767.404	0.0217		767.404	1.00531
	767.423	0.01273		767.423	1
	767.442	0.01129		767.442	1
	767.461	0.01981		767.461	1.00354
	767.48	0.02411		767.48	1.00531
	767.499	0.01984		767.499	1.0141
	767.518	0.01563		767.518	1.01941
	767.537	0.01373		767.537	1.00708
	767.556	0.01837		767.556	1
	767.575	0.01273		767.575	1
	767.594	0.01373		767.594	1
	767.613	0.01794		767.613	1.00354
	767.632	0.02457		767.632	1.00177
	767.651	0.0217		767.651	1.00177
	767.67	0.01605		767.67	1.00177
	767.689	0.01273		767.689	1.01233
	767.708	0.01791		767.708	1.02289
	767.727	0.01981		767.727	1.01587
	767.746	0.01517		767.746	1.00177
	767.765	0.02026		767.765	1.00708
	767.784	0.02457		767.784	1.01764
	767.803	0.02646		767.803	1.0282
	767.822	0.02359		767.822	1.02118
	767.841	0.01938		767.841	1.02472
	767.86	0.02692		767.86	1.02472
	767.879	0.02933		767.879	1.02472
	767.898	0.02313		767.898	1.01587
	767.916	0.02646		767.916	1.00885
	767.935	0.03497		767.935	1.01062
	767.954	0.0477		767.954	1.07843
	767.973	0.05191		767.973	1.41058
	767.992	0.0506		767.992	2.0705
	768.011	0.05103		768.011	2.80792
	768.03	0.04483		768.03	3
	768.049	0.03543		768.049	2.42993
	768.068	0.02457		768.068	1.67139
	768.087	0.01794		768.087	1.21326
	768.106	0.01706		768.106	1.05463
	768.125	0.01895		768.125	1.06958
	768.144	0.01462		768.144	1.09955
	768.163	0.00711		768.163	1.06787
	768.182	0.00146		768.182	1.04761
	768.201	0.00476		768.201	1.03528
	768.22	0.00897		768.22	1.02118
	768.239	0.01129		768.239	1.01587
	768.258	0.01416		768.258	1.02997
	768.277	0.0217		768.277	1.01587
	768.296	0.01938		768.296	1.0141
	768.315	0.01706		768.315	1.00531
	768.334	0.01895		768.334	1.00531
	768.353	0.01184		768.353	1.02472
	768.372	0.01086		768.372	1.03174
	768.391	0.02127		768.391	1.02118
	768.41	0.02414		768.41	1.00885
	768.429	0.03256		768.429	1.00177
	768.448	0.03586		768.448	1.01056
	768.467	0.03067		768.467	1.0282
	768.486	0.01517		768.486	1.03876
	768.505	0.00998		768.505	1.02997
	768.524	0.0123		768.524	1.01764
	768.543	0.02081		768.543	1.01239
	768.562	0.03397		768.562	1.00885
	768.581	0.03497		768.581	1.01764
	768.6	0.02878		768.6	1.01941
	768.619	0.02127		768.619	1.00177
	768.638	0.01184		768.638	1.00177
	768.657	0.00998		768.657	1.00177
	768.676	0.02359		768.676	1.01587
	768.695	0.04672		768.695	1.02118
	768.714	0.0694		768.714	1.01941
	768.733	0.07602		768.733	1.00708
	768.752	0.06143		768.752	1.01764
	768.771	0.04151		768.771	1.02997
	768.79	0.02457		768.79	1.02118
	768.809	0.01895		768.809	1.00531
	768.828	0.02545		768.828	1.01233
	768.847	0.02359		768.847	1.02466
	768.866	0.02545		768.866	1.05463
	768.885	0.03253		768.885	1.05463
	768.904	0.04813		768.904	1.03174
	768.923	0.0571		768.923	1.0141
	768.942	0.04959		768.942	1.00531
	768.961	0.03442		768.961	1.04761
	768.98	0.03311		768.98	1.24848
	768.999	0.02789		768.999	1.60883
	769.018	0.03729		769.018	2.02997
	769.037	0.02933		769.037	2.11365
	769.056	0.01794		769.056	1.8291
	769.075	0.03021		769.075	1.42999
	769.094	0.04151		769.094	1.13306
	769.113	0.04151		769.113	1.03174
	769.132	0.03919		769.132	1.03705
	769.151	0.02503		769.151	1.02649
	769.17	0.01517		769.17	1.04761
	769.189	0.01129		769.189	1.04407
	769.208	0.01273		769.208	1.06256
	769.227	0.01373		769.227	1.06433
	769.246	0.02026		769.246	1.04059
	769.265	0.02081		769.265	1.00708
	769.284	0.01373		769.284	1.00885
	769.303	0.01563		769.303	1.00885
	769.322	0.02359		769.322	1.00177
	769.341	0.03067		769.341	1.00531
	769.36	0.03256		769.36	1.0141
	769.379	0.03211		769.379	1.01587
	769.398	0.03354		769.398	1.00708
	769.417	0.03729		769.417	1.00354
	769.436	0.04395		769.436	1
	769.455	0.04151		769.455	1.00354
	769.474	0.01794		769.474	1.02466
	769.493	0.01318		769.493	1.04755
	769.512	0.01837		769.512	1.04932
	769.531	0.02026		769.531	1.03528
	769.55	0.02359		769.55	1.03705
	769.569	0.02457		769.569	1.02295
	769.588	0.01837		769.588	1.00354
	769.607	0.01419		769.607	1.00354
	769.626	0.01794		769.626	1.00177
	769.645	0.02225		769.645	1
	769.664	0.01651		769.664	1.00531
	769.683	0.01318		769.683	1.0141
	769.702	0.02692		769.702	1.02112
	769.721	0.03919		769.721	1.00354
	769.74	0.03919		769.74	1
	769.759	0.03586		769.759	1
	769.778	0.03497		769.778	1.00879
	769.797	0.03021		769.797	1.01581
	769.816	0.02127		769.816	1.02643
	769.835	0.01318		769.835	1.01764
	769.854	0.01749		769.854	1.01239
	769.873	0.02414		769.873	1.0141
	769.892	0.02789		769.892	1.01764
	769.911	0.02225		769.911	1.00531
	769.93	0.03165		769.93	1
	769.949	0.05567		769.949	1.00879
	769.968	0.04859		769.968	1.0766
	769.987	0.03122		769.987	1.23254
	770.006	0.02603		770.006	1.47571
	770.025	0.02313		770.025	1.6308
	770.044	0.02979		770.044	1.55951
	770.063	0.02457		770.063	1.35156
	770.082	0.02026		770.082	1.20795
	770.101	0.01651		770.101	1.1225
	770.12	0.01749		770.12	1.0661
	770.139	0.01651		770.139	1.06085
	770.158	0.01462		770.158	1.04761
	770.177	0.01373		770.177	1.0423
	770.196	0.01041		770.196	1.04407
	770.215	0.00897		770.215	1.03528
	770.234	0.01086		770.234	1.01062
	770.253	0.01462		770.253	1.00354
	770.272	0.01794		770.272	1.00177
	770.291	0.01895		770.291	1
	770.31	0.01794		770.31	1.0141
	770.329	0.01837		770.329	1.02289
	770.348	0.026		770.348	1.02643
	770.367	0.02734		770.367	1.01587
	770.386	0.03067		770.386	1.00354
	770.405	0.03311		770.405	1.00354
	770.424	0.02603		770.424	1.0141
	770.443	0.02503		770.443	1.01239
	770.462	0.01938		770.462	1.00531
	770.482	0.01419		770.482	1
	770.501	0.01794		770.501	1.00177
	770.52	0.02457		770.52	1.00531
	770.539	0.02878		770.539	1.00708
	770.558	0.03586		770.558	1.00531
	770.577	0.0383		770.577	1.00531
	770.596	0.02979		770.596	1
	770.615	0.01651		770.615	1.00177
	770.634	0.01419		770.634	1
	770.653	0.02313		770.653	1.00702
	770.672	0.02832		770.672	1.00702
	770.691	0.02789		770.691	1.00354
	770.71	0.02734		770.71	1.00354
	770.729	0.02979		770.729	1.00354
	770.748	0.03497		770.748	1.00885
	770.767	0.03687		770.767	1.01764
	770.786	0.03586		770.786	1.0141
	770.805	0.03497		770.805	1.00531
	770.824	0.03311		770.824	1.01233
	770.843	0.03122		770.843	1.00885
	770.862	0.03122		770.862	1.00177
	770.881	0.03021		770.881	1.00708
	770.9	0.02835		770.9	1.00885
	770.919	0.03122		770.919	1.01941
	770.938	0.02878		770.938	1.0141
	770.957	0.0217		770.957	1.00531
	770.976	0.01794		770.976	1.01233
	770.995	0.02503		770.995	1.0661
	771.014	0.03687		771.014	1.13129
	771.033	0.02603		771.033	1.17621
	771.052	0.01318		771.052	1.16126
	771.071	0.00998		771.071	1.13129
	771.09	0.0123		771.09	1.1084
	771.109	0.00943		771.109	1.06433
	771.128	0.00565		771.128	1.04059
	771.147	0.01184		771.147	1.01764
	771.166	0.02081		771.166	1.00177
	771.185	0.02313		771.185	1.00708
	771.204	0.01273		771.204	1.00354
	771.223	0.01086		771.223	1.00708
	771.242	0.00998		771.242	1
	771.261	0.00754		771.261	1.00354
	771.28	0.0123		771.28	1.00708
	771.299	0.01837		771.299	1.00531
	771.318	0.02832		771.318	1.00177
	771.337	0.03253		771.337	1.00177
	771.356	0.03067		771.356	1
	771.376	0.03165		771.376	1
	771.395	0.03397		771.395	1
	771.414	0.03256		771.414	1.00177
	771.433	0.02271		771.433	1
	771.452	0.01794		771.452	1.00177
	771.471	0.02271		771.471	1
	771.49	0.02457		771.49	1.00177
	771.509	0.02271		771.509	1.00177
	771.528	0.01651		771.528	1
	771.547	0.01273		771.547	1.00177
	771.566	0.01086		771.566	1
	771.585	0.01563		771.585	1.00354
	771.604	0.01706		771.604	1.01056
	771.623	0.02271		771.623	1.01056
	771.642	0.02225		771.642	1.00177
	771.661	0.01605		771.661	1.00177
	771.68	0.00943		771.68	1.00531
	771.699	0.01462		771.699	1
	771.718	0.01517		771.718	1
	771.737	0.01517		771.737	1
	771.756	0.01794		771.756	1
	771.775	0.02878		771.775	1
	771.794	0.03687		771.794	1.00177
	771.813	0.03211		771.813	1.00531
	771.832	0.02933		771.832	1.01233
	771.851	0.03165		771.851	1.00531
	771.87	0.02457		771.87	1.00177
	771.889	0.01517		771.889	1.00177
	771.908	0.02026		771.908	1.00354
	771.927	0.03311		771.927	1.00885
	771.946	0.03021		771.946	1.00177
	771.965	0.02026		771.965	1
	771.985	0.01184		771.985	1.00702
	772.004	0.0061		772.004	1.02289
	772.023	0.00565		772.023	1.06079
	772.042	0.0094		772.042	1.07135
	772.061	0.01459		772.061	1.05292
	772.08	0.01514		772.08	1.02472
	772.099	0.01129		772.099	1.00885
	772.118	0.01416		772.118	1.01239
	772.137	0.01892		772.137	1.00885
	772.156	0.02268		772.156	1.01239
	772.175	0.02081		772.175	1.02997
	772.194	0.01273		772.194	1.03174
	772.213	0.00998		772.213	1.01587
	772.232	0.00855		772.232	1.00177
	772.251	0.01651		772.251	1
	772.27	0.01895		772.27	1.00177
	772.289	0.01895		772.289	1
	772.308	0.01373		772.308	1.00354
	772.327	0.00855		772.327	1.00531
	772.346	0.0061		772.346	1
	772.365	0.00711		772.365	1.00177
	772.384	0.0123		772.384	1
	772.403	0.01651		772.403	1
	772.422	0.01517		772.422	1
	772.441	0.01517		772.441	1
	772.46	0.02359		772.46	1.00177
	772.48	0.02835		772.48	1
	772.499	0.02503		772.499	1
	772.518	0.02313		772.518	1
	772.537	0.02271		772.537	1
	772.556	0.01938		772.556	1.00702
	772.575	0.01563		772.575	1.01404
	772.594	0.01605		772.594	1.00708
	772.613	0.01318		772.613	1
	772.632	0.01706		772.632	1
	772.651	0.01517		772.651	1.00177
	772.67	0.01318		772.67	1
	772.689	0.01318		772.689	1
	772.708	0.01984		772.708	1
	772.727	0.02979		772.727	1
	772.746	0.03586		772.746	1
	772.765	0.03687		772.765	1
	772.784	0.04483		772.784	1.00354
	772.803	0.04151		772.803	1.00354
	772.822	0.02414		772.822	1.01056
	772.841	0.01605		772.841	1.01758
	772.86	0.01462		772.86	1.01062
	772.879	0.01706		772.879	1.00531
	772.898	0.02503		772.898	1.00885
	772.918	0.03067		772.918	1.02118
	772.937	0.02979		772.937	1.01941
	772.956	0.03256		772.956	1.01062
	772.975	0.02503		772.975	1.00708
	772.994	0.01462		772.994	1.00177
	773.013	0.01462		773.013	1.00531
	773.032	0.01651		773.032	1.0141
	773.051	0.01794		773.051	1.02997
	773.07	0.01419		773.07	1.02649
	773.089	0.01041		773.089	1.01764
	773.108	0.01605		773.108	1
	773.127	0.01981		773.127	1
	773.146	0.01981		773.146	1
	773.165	0.02225		773.165	1
	773.184	0.03211		773.184	1
	773.203	0.03021		773.203	1.00702
	773.222	0.02603		773.222	1.01581
	773.241	0.02878		773.241	1.01935
	773.26	0.02457		773.26	1.0141
	773.279	0.02026		773.279	1.00531
	773.298	0.01605		773.298	1.00177
	773.318	0.01706		773.318	1
	773.337	0.01706		773.337	1
	773.356	0.01984		773.356	1.00354
	773.375	0.02359		773.375	1
	773.394	0.0217		773.394	1.00354
	773.413	0.02225		773.413	1.00354
	773.432	0.02127		773.432	1.00354
	773.451	0.02313		773.451	1.00354
	773.47	0.01794		773.47	1
	773.489	0.01373		773.489	1.00702
	773.508	0.01517		773.508	1.01404
	773.527	0.01837		773.527	1.01758
	773.546	0.03442		773.546	1.00708
	773.565	0.04251		773.565	1.00354
	773.584	0.03876		773.584	1.00354
	773.603	0.03211		773.603	1.00177
	773.622	0.03165		773.622	1
	773.641	0.03684		773.641	1.00177
	773.66	0.02933		773.66	1
	773.68	0.01706		773.68	1.00177
	773.699	0.01984		773.699	1.00177
	773.718	0.02835		773.718	1.00177
	773.737	0.034		773.737	1
	773.756	0.03876		773.756	1
	773.775	0.04151		773.775	1
	773.794	0.03687		773.794	1.00177
	773.813	0.02878		773.813	1.00879
	773.832	0.03308		773.832	1.00879
	773.851	0.03641		773.851	1.00879
	773.87	0.02603		773.87	1.00354
	773.889	0.02271		773.889	1.00531
	773.908	0.02313		773.908	1.00177
	773.927	0.02313		773.927	1.00354
	773.946	0.03308		773.946	1.01587
	773.965	0.04205		773.965	1.01941
	773.984	0.03641		773.984	1.02997
	774.004	0.02359		774.004	1.02295
	774.023	0.01651		774.023	1.01239
	774.042	0.01563		774.042	1.01239
	774.061	0.0217		774.061	1.00708
	774.08	0.01984		774.08	1.01941
	774.099	0.01794		774.099	1.01764
	774.118	0.01373		774.118	1.00354
	774.137	0.00711		774.137	1.00177
	774.156	0.00476		774.156	1
	774.175	0.00476		774.175	1
	774.194	0.00708		774.194	1.00702
	774.213	0.01041		774.213	1.01056
	774.232	0.00897		774.232	1.00708
	774.251	0.00754		774.251	1
	774.27	0.01184		774.27	1
	774.289	0.01892		774.289	1
	774.308	0.02124		774.308	1
	774.328	0.01749		774.328	1
	774.347	0.01517		774.347	1
	774.366	0.02313		774.366	1.00177
	774.385	0.03729		774.385	1.00177
	774.404	0.03211		774.404	1.00177
	774.423	0.02692		774.423	1
	774.442	0.02271		774.442	1
	774.461	0.02271		774.461	1
	774.48	0.02789		774.48	1
	774.499	0.02878		774.499	1
	774.518	0.01895		774.518	1
	774.537	0.01419		774.537	1.00177
	774.556	0.00809		774.556	1
	774.575	0.0061		774.575	1
	774.594	0.00998		774.594	1
	774.614	0.01938		774.614	1
	774.633	0.02603		774.633	1
	774.652	0.01938		774.652	1
	774.671	0.01794		774.671	1.00879
	774.69	0.02127		774.69	1.02112
	774.709	0.02414		774.709	1.02289
	774.728	0.02081		774.728	1.00708
	774.747	0.01419		774.747	1.00354
	774.766	0.01373		774.766	1
	774.785	0.01419		774.785	1
	774.804	0.01129		774.804	1
	774.823	0.00998		774.823	1
	774.842	0.01605		774.842	1.00879
	774.861	0.02789		774.861	1.00177
	774.88	0.02734		774.88	1
	774.9	0.01938		774.9	1
	774.919	0.02414		774.919	1.00354
	774.938	0.03442		774.938	1.00531
	774.957	0.04108		774.957	1.01233
	774.976	0.03497		774.976	1.02112
	774.995	0.01895		774.995	1.02289
	775.014	0.02271		775.014	1.02643
	775.033	0.0217		775.033	1.01239
	775.052	0.01706		775.052	1.00177
	775.071	0.01563		775.071	1.00354
	775.09	0.01041		775.09	1
	775.109	0.01559		775.109	1
	775.128	0.01935		775.128	1.00177
	775.148	0.01837		775.148	1
	775.167	0.01749		775.167	1
	775.186	0.01706		775.186	1
	775.205	0.01706		775.205	1.00177
	775.224	0.01895		775.224	1
	775.243	0.02271		775.243	1
	775.262	0.02545		775.262	1.00354
	775.281	0.02313		775.281	1.01056
	775.3	0.00943		775.3	1.01233
	775.319	0.0061		775.319	1.00354
	775.338	0.0123		775.338	1
	775.357	0.01837		775.357	1.00177
	775.376	0.026		775.376	1.00354
	775.395	0.03827		775.395	1.01056
	775.415	0.034		775.415	1.00885
	775.434	0.0217		775.434	1.00531
	775.453	0.02225		775.453	1
	775.472	0.03497		775.472	1
	775.491	0.03775		775.491	1
	775.51	0.03311		775.51	1
	775.529	0.01706		775.529	1
	775.548	0.01129		775.548	1
	775.567	0.01706		775.567	1
	775.586	0.02026		775.586	1.00531
	775.605	0.01651		775.605	1.01062
	775.624	0.01651		775.624	1.01062
	775.643	0.01794		775.643	1.00354
	775.663	0.00943		775.663	1
	775.682	0.00998		775.682	1.00177
	775.701	0.02127		775.701	1
	775.72	0.02457		775.72	1
	775.739	0.02081		775.739	1
	775.758	0.01984		775.758	1
	775.777	0.02835		775.777	1
	775.796	0.03497		775.796	1.00177
	775.815	0.03354		775.815	1.00531
	775.834	0.02878		775.834	1.00531
	775.853	0.02026		775.853	1.00531
	775.872	0.01605		775.872	1
	775.892	0.02646		775.892	1.00177
	775.911	0.04672		775.911	1.00354
	775.93	0.05811		775.93	1.00531
	775.949	0.05768		775.949	1.01062
	775.968	0.05103		775.968	1.02997
	775.987	0.04108		775.987	1.06964
	776.006	0.04859		776.006	1.11017
	776.025	0.05103		776.025	1.0943
	776.044	0.03586		776.044	1.04938
	776.063	0.02835		776.063	1.02295
	776.082	0.02026		776.082	1.00708
	776.101	0.00998		776.101	1.00708
	776.121	0.01273		776.121	1.00177
	776.14	0.01462		776.14	1
	776.159	0.01462		776.159	1.00177
	776.178	0.0123		776.178	1.00354
	776.197	0.01517		776.197	1.00177
	776.216	0.01892		776.216	1.00354
	776.235	0.02026		776.235	1.00708
	776.254	0.01563		776.254	1.01764
	776.273	0.01605		776.273	1.01941
	776.292	0.01651		776.292	1.01062
	776.311	0.02933		776.311	1
	776.331	0.03586		776.331	1
	776.35	0.03122		776.35	1.00177
	776.369	0.02313		776.369	1.01233
	776.388	0.02646		776.388	1.01935
	776.407	0.02692		776.407	1.01062
	776.426	0.02835		776.426	1
	776.445	0.03354		776.445	1
	776.464	0.03067		776.464	1
	776.483	0.01984		776.483	1.00354
	776.502	0.02646		776.502	1
	776.521	0.03687		776.521	1
	776.54	0.03687		776.54	1
	776.56	0.02835		776.56	1
	776.579	0.02692		776.579	1.00177
	776.598	0.02081		776.598	1.00177
	776.617	0.01462		776.617	1
	776.636	0.01706		776.636	1.00177
	776.655	0.03354		776.655	1
	776.674	0.04538		776.674	1
	776.693	0.03497		776.693	1
	776.712	0.01129		776.712	1.00177
	776.731	0.00754		776.731	1.00531
	776.75	0.01706		776.75	1.00354
	776.77	0.02789		776.77	1.00531
	776.789	0.0217		776.789	1.00177
	776.808	0.01563		776.808	1.00879
	776.827	0.01129		776.827	1.01233
	776.846	0.01373		776.846	1.00708
	776.865	0.01605		776.865	1
	776.884	0.02124		776.884	1
	776.903	0.02689		776.903	1
	776.922	0.03497		776.922	1.00177
	776.941	0.05335		776.941	1.0141
	776.961	0.0694		776.961	1.03522
	776.98	0.07041		776.98	1.06604
	776.999	0.04816		776.999	1.06958
	777.018	0.02127		777.018	1.04938
	777.037	0.01837		777.037	1.02649
	777.056	0.02734		777.056	1.02295
	777.075	0.02646		777.075	1.01239
	777.094	0.02026		777.094	1
	777.113	0.02127		777.113	1
	777.132	0.02503		777.132	1
	777.152	0.02457		777.152	1.00354
	777.171	0.02689		777.171	1
	777.19	0.01895		777.19	1.00177
	777.209	0.01462		777.209	1
	777.228	0.02026		777.228	1
	777.247	0.02026		777.247	1
	777.266	0.01794		777.266	1
	777.285	0.02081		777.285	1
	777.304	0.02225		777.304	1.01056
	777.323	0.02313		777.323	1.02289
	777.343	0.01938		777.343	1.0282
	777.362	0.01605		777.362	1.01587
	777.381	0.0217		777.381	1.01239
	777.4	0.02545		777.4	1.01764
	777.419	0.01984		777.419	1.01062
	777.438	0.01517		777.438	1.00531
	777.457	0.00809		777.457	1.00354
	777.476	0.01318		777.476	1.00177
	777.495	0.02414		777.495	1.00354
	777.514	0.03497		777.514	1
	777.534	0.03256		777.534	1
	777.553	0.02271		777.553	1.00354
	777.572	0.01129		777.572	1.01056
	777.591	0.01184		777.591	1.01056
	777.61	0.02026		777.61	1.00531
	777.629	0.02414		777.629	1
	777.648	0.02359		777.648	1.00177
	777.667	0.02646		777.667	1.00177
	777.686	0.03165		777.686	1.00354
	777.705	0.0217		777.705	1.00354
	777.725	0.01273		777.725	1
	777.744	0.01184		777.744	1
	777.763	0.02081		777.763	1
	777.782	0.03122		777.782	1
	777.801	0.04349		777.801	1
	777.82	0.05103		777.82	1.00177
	777.839	0.03775		777.839	1
	777.858	0.01984		777.858	1.00354
	777.877	0.01895		777.877	1.00885
	777.897	0.034		777.897	1.01062
	777.916	0.07459		777.916	1.02997
	777.935	0.1525		777.935	1.07489
	777.954	0.23472		777.954	1.12244
	777.973	0.27577		777.973	1.19379
	777.992	0.23792		777.992	1.26428
	778.011	0.16147		778.011	1.27838
	778.03	0.09772		778.03	1.2027
	778.049	0.05567		778.049	1.16303
	778.068	0.03497		778.068	1.10663
	778.088	0.03961		778.088	1.04938
	778.107	0.05002		778.107	1.03174
	778.126	0.04816		778.126	1.02118
	778.145	0.03311		778.145	1.00708
	778.164	0.0217		778.164	1.00885
	778.183	0.02271		778.183	1.00354
	778.202	0.02127		778.202	1
	778.221	0.02359		778.221	1.00177
	778.24	0.01419		778.24	1.00177
	778.26	0.0123		778.26	1.00177
	778.279	0.01318		778.279	1.00177
	778.298	0.01837		778.298	1
	778.317	0.01837		778.317	1
	778.336	0.01563		778.336	1.00177
	778.355	0.01895		778.355	1
	778.374	0.0217		778.374	1
	778.393	0.01984		778.393	1.00354
	778.413	0.01749		778.413	1.00885
	778.432	0.0217		778.432	1.01062
	778.451	0.0217		778.451	1.00531
	778.47	0.02414		778.47	1
	778.489	0.02457		778.489	1.00177
	778.508	0.02878		778.508	1.00177
	778.527	0.03253		778.527	1
	778.546	0.02359		778.546	1.00177
	778.565	0.02081		778.565	1.00879
	778.585	0.01605		778.585	1.0141
	778.604	0.01837		778.604	1.01587
	778.623	0.02646		778.623	1.00708
	778.642	0.02734		778.642	1
	778.661	0.01984		778.661	1.00354
	778.68	0.02127		778.68	1.00177
	778.699	0.02225		778.699	1.00177
	778.718	0.02271		778.718	1.00177
	778.737	0.02359		778.737	1.00354
	778.757	0.01794		778.757	1.00177
	778.776	0.01706		778.776	1
	778.795	0.02414		778.795	1
	778.814	0.02457		778.814	1
	778.833	0.02271		778.833	1
	778.852	0.01794		778.852	1
	778.871	0.01373		778.871	1
	778.89	0.01651		778.89	1.00702
	778.91	0.02646		778.91	1.01758
	778.929	0.0694		778.929	1.02643
	778.948	0.13169		778.948	1.04755
	778.967	0.18369		778.967	1.12067
	778.986	0.18888		778.986	1.21845
	779.005	0.15915		779.005	1.25018
	779.024	0.1171		779.024	1.16657
	779.043	0.06708		779.043	1.07666
	779.063	0.03211		779.063	1.04938
	779.082	0.02603		779.082	1.0141
	779.101	0.0383		779.101	1.00708
	779.12	0.03876		779.12	1.01062
	779.139	0.02359		779.139	1.0141
	779.158	0.01749		779.158	1.00885
	779.177	0.0217		779.177	1.00177
	779.196	0.02225		779.196	1
	779.215	0.01794		779.215	1.00177
	779.235	0.01895		779.235	1
	779.254	0.02789		779.254	1.00177
	779.273	0.03308		779.273	1
	779.292	0.02545		779.292	1
	779.311	0.02127		779.311	1
	779.33	0.02878		779.33	1.00177
	779.349	0.03442		779.349	1
	779.368	0.03122		779.368	1
	779.388	0.03122		779.388	1
	779.407	0.03497		779.407	1
	779.426	0.03543		779.426	1.00177
	779.445	0.03586		779.445	1.00177
	779.464	0.04437		779.464	1.00177
	779.483	0.04294		779.483	1
	779.502	0.02979		779.502	1
	779.521	0.02734		779.521	1
	779.541	0.02734		779.541	1
	779.56	0.03211		779.56	1.00531
	779.579	0.03211		779.579	1.00885
	779.598	0.02359		779.598	1.01587
	779.617	0.01837		779.617	1.02289
	779.636	0.01605		779.636	1.01764
	779.655	0.01892		779.655	1.00885
	779.675	0.02225		779.675	1.00708
	779.694	0.02026		779.694	1.00177
	779.713	0.01837		779.713	1.00354
	779.732	0.01605		779.732	1.00708
	779.751	0.02026		779.751	1.00354
	779.77	0.03311		779.77	1
	779.789	0.04816		779.789	1.00354
	779.808	0.04151		779.808	1
	779.828	0.02414		779.828	1.00354
	779.847	0.01895		779.847	1.01941
	779.866	0.01706		779.866	1.0141
	779.885	0.01794		779.885	1.00885
	779.904	0.03021		779.904	1.00177
	779.923	0.05103		779.923	1.00177
	779.942	0.10669		779.942	1.01056
	779.961	0.21104		779.961	1.0282
	779.981	0.33573		779.981	1.08197
	780	0.38343		780	1.16657
	780.019	0.30079		780.019	1.25903
	780.038	0.17096		780.038	1.24493
	780.057	0.08975		780.057	1.14191
	780.076	0.07791		780.076	1.06256
	780.095	0.06519		780.095	1.01239
	780.115	0.06088		780.115	1.01062
	780.134	0.04538		780.134	1.00531
	780.153	0.03729		780.153	1.00354
	780.172	0.03122		780.172	1.00708
	780.191	0.03122		780.191	1.00354
	780.21	0.02603		780.21	1.00354
	780.229	0.02127		780.229	1.00531
	780.249	0.01517		780.249	1.00354
	780.268	0.01462		780.268	1.00177
	780.287	0.01981		780.287	1
	780.306	0.02499		780.306	1
	780.325	0.03207		780.325	1
	780.344	0.03583		780.344	1
	780.363	0.02979		780.363	1.00354
	780.382	0.01273		780.382	1.00177
	780.402	0.01273		780.402	1
	780.421	0.02081		780.421	1
	780.44	0.02271		780.44	1
	780.459	0.02081		780.459	1.00177
	780.478	0.01373		780.478	1.00879
	780.497	0.01563		780.497	1.01056
	780.516	0.02692		780.516	1.00354
	780.536	0.04062		780.536	1
	780.555	0.03021		780.555	1
	780.574	0.01749		780.574	1
	780.593	0.01419		780.593	1
	780.612	0.01563		780.612	1
	780.631	0.03021		780.631	1
	780.65	0.0383		780.65	1
	780.67	0.02789		780.67	1.00177
	780.689	0.01938		780.689	1
	780.708	0.01651		780.708	1.00354
	780.727	0.01605		780.727	1
	780.746	0.02026		780.746	1
	780.765	0.02414		780.765	1
	780.784	0.034		780.784	1
	780.804	0.03687		780.804	1
	780.823	0.03311		780.823	1.00702
	780.842	0.01895		780.842	1.01056
	780.861	0.02026		780.861	1.00708
	780.88	0.02081		780.88	1
	780.899	0.01837		780.899	1.00354
	780.918	0.02689		780.918	1
	780.938	0.07459		780.938	1.00177
	780.957	0.1558		780.957	1
	780.976	0.22761		780.976	1.02997
	780.995	0.2483		780.995	1.0802
	781.014	0.2139		781.014	1.13306
	781.033	0.13602		781.033	1.15595
	781.052	0.08499		781.052	1.11542
	781.072	0.0538		781.072	1.04938
	781.091	0.02457		781.091	1.00354
	781.11	0.03253		781.11	1.00177
	781.129	0.03586		781.129	1.00354
	781.148	0.02692		781.148	1.01233
	781.167	0.02457		781.167	1.00885
	781.186	0.02271		781.186	1.0141
	781.206	0.01837		781.206	1.01764
	781.225	0.01086		781.225	1.01764
	781.244	0.00665		781.244	1
	781.263	0.01462		781.263	1
	781.282	0.03122		781.282	1.00354
	781.301	0.02457		781.301	1.00177
	781.321	0.00565		781.321	1.00879
	781.34	0.00754		781.34	1.0141
	781.359	0.01837		781.359	1.01764
	781.378	0.03253		781.378	1.01062
	781.397	0.03641		781.397	1.00177
	781.416	0.02878		781.416	1
	781.435	0.03067		781.435	1.00354
	781.455	0.03067		781.455	1
	781.474	0.03021		781.474	1
	781.493	0.03165		781.493	1
	781.512	0.02646		781.512	1.00702
	781.531	0.01984		781.531	1.01404
	781.55	0.00943		781.55	1.00708
	781.569	0.00809		781.569	1
	781.589	0.01318		781.589	1
	781.608	0.02225		781.608	1
	781.627	0.02832		781.627	1.00531
	781.646	0.02457		781.646	1.00708
	781.665	0.02646		781.665	1.00531
	781.684	0.02545		781.684	1
	781.704	0.01749		781.704	1.00177
	781.723	0.01794		781.723	1.00354
	781.742	0.01984		781.742	1.01233
	781.761	0.02081		781.761	1.03174
	781.78	0.02503		781.78	1.04584
	781.799	0.02835		781.799	1.03351
	781.818	0.02878		781.818	1.01764
	781.838	0.03397		781.838	1.0141
	781.857	0.03311		781.857	1.02112
	781.876	0.03497		781.876	1.02112
	781.895	0.03961		781.895	1.01062
	781.914	0.04349		781.914	1.02997
	781.933	0.05377		781.933	1.03699
	781.953	0.07556		781.953	1.04578
	781.972	0.11429		781.972	1.05286
	781.991	0.15015		781.991	1.10309
	782.01	0.15812		782.01	1.2467
	782.029	0.1265		782.029	1.47931
	782.048	0.07935		782.048	1.65021
	782.067	0.04251		782.067	1.60529
	782.087	0.03919		782.087	1.35858
	782.106	0.03876		782.106	1.12073
	782.125	0.04538		782.125	1.06085
	782.144	0.04019		782.144	1.05292
	782.163	0.02127		782.163	1.05463
	782.182	0.01563		782.182	1.03351
	782.202	0.01373		782.202	1.0141
	782.221	0.01605		782.221	1.01239
	782.24	0.01981		782.24	1.00885
	782.259	0.0217		782.259	1.00708
	782.278	0.01984		782.278	1.00354
	782.297	0.01749		782.297	1.00885
	782.317	0.01749		782.317	1.00531
	782.336	0.01563		782.336	1
	782.355	0.01419		782.355	1
	782.374	0.01184		782.374	1.00531
	782.393	0.00711		782.393	1.01233
	782.412	0.01462		782.412	1.0141
	782.432	0.02271		782.432	1.00708
	782.451	0.02692		782.451	1.00708
	782.47	0.01517		782.47	1.00177
	782.489	0.01462		782.489	1.01056
	782.508	0.01184		782.508	1.01758
	782.527	0.02225		782.527	1.01587
	782.547	0.02789		782.547	1.01062
	782.566	0.02414		782.566	1.00354
	782.585	0.01706		782.585	1
	782.604	0.01318		782.604	1.01056
	782.623	0.01984		782.623	1.00531
	782.642	0.02734		782.642	1.00531
	782.662	0.02878		782.662	1.00531
	782.681	0.02734		782.681	1.01233
	782.7	0.02359		782.7	1.01764
	782.719	0.02081		782.719	1.0141
	782.738	0.02835		782.738	1.00708
	782.757	0.03211		782.757	1.00531
	782.777	0.02026		782.777	1.00354
	782.796	0.01462		782.796	1.00177
	782.815	0.01563		782.815	1.02118
	782.834	0.02359		782.834	1.03174
	782.853	0.02457		782.853	1.01941
	782.872	0.02545		782.872	1.00177
	782.892	0.03211		782.892	1
	782.911	0.03311		782.911	1.01764
	782.93	0.03641		782.93	1.0141
	782.949	0.04813		782.949	1.01239
	782.968	0.0737		782.968	1.0282
	782.987	0.09583		782.987	1.0661
	783.007	0.09253		783.007	1.14539
	783.026	0.06607		783.026	1.24848
	783.045	0.05899		783.045	1.34979
	783.064	0.0383		783.064	1.35333
	783.083	0.02603		783.083	1.22028
	783.102	0.03067		783.102	1.09253
	783.122	0.01605		783.122	1.02472
	783.141	0.01184		783.141	1.01239
	783.16	0.0123		783.16	1.00354
	783.179	0.01517		783.179	1.00354
	783.198	0.02225		783.198	1.00354
	783.217	0.02503		783.217	1.00177
	783.237	0.01517		783.237	1.00708
	783.256	0.01837		783.256	1.00531
	783.275	0.026		783.275	1.00354
	783.294	0.02271		783.294	1
	783.313	0.0217		783.313	1
	783.332	0.02081		783.332	1
	783.352	0.01605		783.352	1
	783.371	0.01749		783.371	1
	783.39	0.01041		783.39	1.00354
	783.409	0.01041		783.409	1.01056
	783.428	0.01416		783.428	1.00531
	783.448	0.01184		783.448	1.00354
	783.467	0.01086		783.467	1.00531
	783.486	0.01419		783.486	1.02118
	783.505	0.01273		783.505	1.03705
	783.524	0.01749		783.524	1.03351
	783.543	0.01651		783.543	1.03174
	783.563	0.01749		783.563	1.02649
	783.582	0.01837		783.582	1.01941
	783.601	0.0123		783.601	1.00531
	783.62	0.00998		783.62	1.00177
	783.639	0.01749		783.639	1.00354
	783.658	0.02545		783.658	1
	783.678	0.01984		783.678	1.00177
	783.697	0.01938		783.697	1
	783.716	0.01749		783.716	1.00354
	783.735	0.02414		783.735	1.00531
	783.754	0.03775		783.754	1.00708
	783.774	0.04437		783.774	1.00885
	783.793	0.04108		783.793	1.00177
	783.812	0.03354		783.812	1
	783.831	0.03919		783.831	1.00177
	783.85	0.04294		783.85	1
	783.869	0.03211		783.869	1.00702
	783.889	0.02734		783.889	1.01233
	783.908	0.03165		783.908	1.01935
	783.927	0.03684		783.927	1.02991
	783.946	0.03772		783.946	1.02643
	783.965	0.03641		783.965	1.01062
	783.985	0.0383		783.985	1.00177
	784.004	0.04395		784.004	1.03699
	784.023	0.05335		784.023	1.10657
	784.042	0.04349		784.042	1.13831
	784.061	0.03919		784.061	1.15418
	784.08	0.02835		784.08	1.1084
	784.1	0.01651		784.1	1.04059
	784.119	0.01651		784.119	1.00708
	784.138	0.02026		784.138	1.00885
	784.157	0.01651		784.157	1.00708
	784.176	0.01605		784.176	1.00708
	784.196	0.01086		784.196	1.01062
	784.215	0.00998		784.215	1.01062
	784.234	0.01318		784.234	1.00531
	784.253	0.01605		784.253	1.00531
	784.272	0.01605		784.272	1
	784.291	0.0123		784.291	1.00177
	784.311	0.0123		784.311	1.00177
	784.33	0.01462		784.33	1
	784.349	0.02313		784.349	1
	784.368	0.02225		784.368	1.00177
	784.387	0.02081		784.387	1
	784.407	0.01605		784.407	1
	784.426	0.01273		784.426	1.00177
	784.445	0.01273		784.445	1
	784.464	0.01273		784.464	1.00177
	784.483	0.02124		784.483	1.01233
	784.503	0.02124		784.503	1.03699
	784.522	0.01837		784.522	1.04401
	784.541	0.02268		784.541	1.02643
	784.56	0.02457		784.56	1.01764
	784.579	0.01895		784.579	1.01587
	784.598	0.01605		784.598	1
	784.618	0.01462		784.618	1.00354
	784.637	0.01605		784.637	1.00177
	784.656	0.00897		784.656	1.00531
	784.675	0.01086		784.675	1.01233
	784.694	0.02081		784.694	1.02112
	784.714	0.02414		784.714	1.01587
	784.733	0.03586		784.733	1.02118
	784.752	0.04627		784.752	1.01764
	784.771	0.05103		784.771	1.01587
	784.79	0.05567		784.79	1.01587
	784.81	0.04395		784.81	1.01764
	784.829	0.02359		784.829	1.01239
	784.848	0.02271		784.848	1.00708
	784.867	0.02789		784.867	1.00354
	784.886	0.04913		784.886	1.00177
	784.906	0.06085		784.906	1.00708
	784.925	0.05002		784.925	1.0141
	784.944	0.0383		784.944	1.01941
	784.963	0.04251		784.963	1.0282
	784.982	0.04108		784.982	1.03174
	785.001	0.03165		785.001	1.01062
	785.021	0.02457		785.021	1.03174
	785.04	0.02225		785.04	1.07141
	785.059	0.0217		785.059	1.0943
	785.078	0.02081		785.078	1.06256
	785.097	0.0123		785.097	1.03351
	785.117	0.01086		785.117	1.01062
	785.136	0.01086		785.136	1.00177
	785.155	0.01129		785.155	1.00354
	785.174	0.00998		785.174	1.02118
	785.193	0.00809		785.193	1.02472
	785.213	0.01129		785.213	1.02295
	785.232	0.01892		785.232	1.00885
	785.251	0.02356		785.251	1
	785.27	0.02457		785.27	1.00531
	785.289	0.0217		785.289	1.01587
	785.309	0.0217		785.309	1.00885
	785.328	0.01605		785.328	1
	785.347	0.00998		785.347	1
	785.366	0.01318		785.366	1
	785.385	0.01651		785.385	1
	785.405	0.01938		785.405	1
	785.424	0.0217		785.424	1
	785.443	0.02503		785.443	1.00177
	785.462	0.02313		785.462	1
	785.481	0.01938		785.481	1.00177
	785.501	0.0217		785.501	1
	785.52	0.02081		785.52	1.00879
	785.539	0.02313		785.539	1.02289
	785.558	0.02414		785.558	1.0282
	785.577	0.03165		785.577	1.01239
	785.597	0.03067		785.597	1.00177
	785.616	0.02789		785.616	1.00177
	785.635	0.01651		785.635	1.01056
	785.654	0.02026		785.654	1.02466
	785.673	0.03165		785.673	1.02466
	785.693	0.0383		785.693	1.00885
	785.712	0.03543		785.712	1.00177
	785.731	0.04151		785.731	1.0141
	785.75	0.04727		785.75	1.02466
	785.769	0.03919		785.769	1.0282
	785.789	0.03729		785.789	1.00885
	785.808	0.04151		785.808	1
	785.827	0.04205		785.827	1
	785.846	0.03354		785.846	1
	785.865	0.01749		785.865	1
	785.885	0.01517		785.885	1
	785.904	0.01651		785.904	1
	785.923	0.02414		785.923	1.00354
	785.942	0.02734		785.942	1.02643
	785.962	0.02933		785.962	1.04932
	785.981	0.03729		785.981	1.06079
	786	0.04859		786	1.03528
	786.019	0.04483		786.019	1.03882
	786.038	0.01938		786.038	1.03705
	786.058	0.00943		786.058	1.03705
	786.077	0.00897		786.077	1.03528
	786.096	0.01041		786.096	1.00885
	786.115	0.01648		786.115	1
	786.134	0.01563		786.134	1
	786.154	0.0123		786.154	1.00354
	786.173	0.00897		786.173	1.01233
	786.192	0.01041		786.192	1.0141
	786.211	0.01605		786.211	1.01062
	786.23	0.02081		786.23	1.00177
	786.25	0.01419		786.25	1.00531
	786.269	0.00943		786.269	1.01062
	786.288	0.01129		786.288	1.00708
	786.307	0.01981		786.307	1.00177
	786.326	0.02933		786.326	1
	786.346	0.03165		786.346	1
	786.365	0.02878		786.365	1
	786.384	0.02603		786.384	1.00177
	786.403	0.01794		786.403	1
	786.423	0.02503		786.423	1
	786.442	0.02835		786.442	1
	786.461	0.02313		786.461	1
	786.48	0.01318		786.48	1.00531
	786.499	0.00711		786.499	1.00177
	786.519	0.00943		786.519	1.00354
	786.538	0.01794		786.538	1.00885
	786.557	0.01563		786.557	1.0141
	786.576	0.01041		786.576	1.00885
	786.595	0.00809		786.595	1
	786.615	0.01086		786.615	1.00354
	786.634	0.01318		786.634	1.00354
	786.653	0.02127		786.653	1
	786.672	0.02545		786.672	1
	786.692	0.01605		786.692	1
	786.711	0.00998		786.711	1.00177
	786.73	0.01419		786.73	1.00177
	786.749	0.03211		786.749	1.00177
	786.768	0.05002		786.768	1
	786.788	0.04251		786.788	1
	786.807	0.02734		786.807	1
	786.826	0.01273		786.826	1.00531
	786.845	0.01749		786.845	1.00354
	786.864	0.02026		786.864	1.00177
	786.884	0.02271		786.884	1.00354
	786.903	0.02789		786.903	1.00708
	786.922	0.0383		786.922	1.00531
	786.941	0.04627		786.941	1.01233
	786.961	0.04349		786.961	1.01764
	786.98	0.02271		786.98	1.02118
	786.999	0.01706		786.999	1.01764
	787.018	0.01419		787.018	1.00885
	787.037	0.0123		787.037	1.00885
	787.057	0.02127		787.057	1.00708
	787.076	0.02646		787.076	1.00354
	787.095	0.02271		787.095	1
	787.114	0.01984		787.114	1.00177
	787.134	0.01563		787.134	1.00177
	787.153	0.01318		787.153	1.00177
	787.172	0.01462		787.172	1
	787.191	0.01184		787.191	1.00177
	787.21	0.00897		787.21	1.00177
	787.23	0.00855		787.23	1.00531
	787.249	0.00665		787.249	1.00708
	787.268	0.01086		787.268	1.02118
	787.287	0.01273		787.287	1.02118
	787.307	0.00754		787.307	1.00354
	787.326	0.00522		787.326	1.00177
	787.345	0.00855		787.345	1.00177
	787.364	0.01419		787.364	1
	787.383	0.01984		787.383	1
	787.403	0.02127		787.403	1
	787.422	0.01895		787.422	1
	787.441	0.01184		787.441	1
	787.46	0.02124		787.46	1
	787.48	0.0217		787.48	1.00531
	787.499	0.02734		787.499	1.0141
	787.518	0.03543		787.518	1.00885
	787.537	0.02734		787.537	1.00885
	787.556	0.01273		787.556	1.01764
	787.576	0.0123		787.576	1.01239
	787.595	0.01984		787.595	1
	787.614	0.02603		787.614	1
	787.633	0.01749		787.633	1.00177
	787.653	0.01086		787.653	1.00879
	787.672	0.01184		787.672	1.01056
	787.691	0.01273		787.691	1.00885
	787.71	0.01749		787.71	1
	787.729	0.02313		787.729	1
	787.749	0.026		787.749	1
	787.768	0.03397		787.768	1.00177
	787.787	0.04151		787.787	1
	787.806	0.03586		787.806	1
	787.826	0.02979		787.826	1.00354
	787.845	0.03641		787.845	1.00354
	787.864	0.02359		787.864	1.00531
	787.883	0.01041		787.883	1.01233
	787.903	0.01184		787.903	1.01764
[truncated: 109 more rows]

## Sheet: Fig. 2
	Fig. 2c														Fig. 2d														Fig. 2d inset				Fig. 2e											Fig. 2f
	AgInS2 reference peak		r = 1.8 nm, l = 0		r = 1.8 nm, l = 0.6 nm		r = 1.8 nm, l = 1.2 nm		r = 1.8 nm, l = 1.6 nm		AgGaS2 reference peak				Absorbance (a.u.)							PL Intensity (a.u.)							PL QY				X=0.2		X=0.5		X=0.6		X=0.7		X=0.9
	2theta	intensity	2theta	intensity	2theta	intensity	2theta	intensity	2theta	intensity	2theta	intensity			Wavelength	l = 0	l = 0.6 nm	l = 1.2 nm	l = 1.6 nm	l = 2.9 nm		Wavelength	l = 0	l = 0.6 nm	l = 1.2 nm	l = 1.6 nm	l = 2.9 nm		l (nm)	PL QY (%)	error bar (SD)		Wavelength	PL Intensity	Wavelength	PL Intensity	Wavelength	PL Intensity	Wavelength	PL Intensity	Wavelength	PL Intensity		X	Eg(Cal)	Eg(exp)	X	PL QY	error bar (SD)
	17.175	0	20	0.01035	20	1.02439	17.2855	2.01146	20	3.00099	17.653	0.02424			350	2.18895	2.61436	3.14498	4.35733	7.72299		460	0	0.000799628	0.00315	0.01342	0.00452		0	6	1		360	0.000398937	460	0.00134	460	0.00125	460	0.000867615	460	0		0.2	2.977	2.75	0.2	48	4.8
	26.901	0.8	20.0399	0.00994	20.0399	1.02318	17.4301	2.01202	20.0399	3.00098	27.919	0.8			351	2.15658	2.57671	3.10878	4.30295	7.60503		461	0.00685	0	0.00827	0.01407	0.0053		0.3	42	2.1		361	0.000346617	461	0.00141	461	0.00161	461	0.000928713	461	0.00061891		0.5	2.753	2.583	0.3	80	9.6
	28.439	0	20.08	0.00953	20.08	1.022	17.5748	2.01263	20.08	3.00098	30.293	0.02424			352	2.12837	2.55554	3.08398	4.26645	7.52343		462	0.01457	0.000466747	0.00949	0.00472	0.00864		0.6	77	3.8		362	0.000392397	462	0.000471921	462	0.00147	462	0.00178	462	0.00122		0.6	2.529	2.455	0.5	95	4.75
	30.72	0.12012	20.12	0.00913	20.12	1.02085	17.7194	2.0133	20.12	3.00098	31.048	0.07272			353	2.09867	2.52715	3.0472	4.2075	7.43152		463	0.02316	0.0022	0.01029	0	0.01198		0.9	87	4.3		363	0.000824033	463	0	463	0.00114	463	0.00164	463	0.0018		0.7	2.42	2.398	0.6	95	5
	32.024	0.05284	20.16	0.00875	20.16	1.01973	17.8641	2.01403	20.16	3.00098	34.798	0.02424			354	2.07786	2.49494	3.01456	4.16089	7.32711		464	0.03262	0.0052	0.01139	0.00815	0.01297		1.2	92	4.6		364	0.000529736	464	0.000815136	464	0.00165	464	0.00126	464	0.00235		0.9	2.203	2.254	0.7	92	6
	35.405	0	20.2	0.00838	20.2	1.01864	18.0088	2.01482	20.2	3.00099	35.906	0.02424			355	2.06248	2.45302	2.98035	4.12078	7.25299		465	0.04296	0.00947	0.01709	0.01516	0.01405		1.6	95	4.75		365	0.000608215	465	0.00152	465	0.00128	465	0.00136	465	0.00289					0.8	93	5.1
	42.354	0	20.24	0.00803	20.24	1.01758	18.1535	2.01437	20.24	3.001	43.938	0.00808			356	2.0315	2.44435	2.95469	4.06789	7.12973		466	0.05419	0.015	0.02272	0.01416	0.01513		2.3	95	4.7		366	0.000837113	466	0.00142	466	0.00159	466	0.00111	466	0.00341					0.9	87	8
	43.999	0.13052	20.28	0.00768	20.28	1.01655	18.2982	2.01657	20.28	3.00102	44.461	0.1212			357	2.01	2.42244	2.91935	4.04288	7.04611		467	0.0663	0.0218	0.0273	0.01858	0.02298		2.8	93	4.65		367	0.000621295	467	0.00186	467	0.00129	467	0.00139	467	0.0039
	44.968	0.24184	20.32	0.00735	20.32	1.01556	18.4429	2.01662	20.32	3.00104	46.788	0			358	1.99821	2.40184	2.9001	3.9983	6.98238		468	0.0793	0.02985	0.03195	0.02323	0.02849		3.3	90	4.5		368	0.000824033	468	0.00232	468	0.00169	468	0.00111	468	0.00438
	47.565	0	20.36	0.00703	20.36	1.01459	18.5877	2.01839	20.36	3.00106	47.305	0.19392			359	1.96561	2.36493	2.85549	3.95414	6.89576		469	0.09316	0.0392	0.04125	0.02232	0.03811		3.8	82	4.1		369	0.00104	469	0.00223	469	0.00145	469	0.00158	469	0.00483
	52.328	0.1842	20.4	0.00672	20.4	1.01366	18.7324	2.0194	20.4	3.00109	48.238	0.00808			360	1.95001	2.35522	2.83866	3.90646	6.79763		470	0.10788	0.0498	0.05166	0.03639	0.03978		4.5	73	3.65		370	0.00104	470	0.00364	470	0.00153	470	0.00161	470	0.00526
	54.024	0.08088	20.44	0.00643	20.44	1.01275	18.8772	2.01957	20.44	3.00112	53.31	0.19392			361	1.93255	2.32904	2.79847	3.85964	6.73284		471	0.12232	0.05985	0.06364	0.04142	0.05186		5.2	60	3		371	0.00129	471	0.00414	471	0.00131	471	0.00214	471	0.00555
	54.024	0.08088	20.48	0.00615	20.48	1.01188	19.022	2.01887	20.48	3.00116	57.244	0			362	1.90088	2.30124	2.77068	3.8291	6.65191		472	0.13822	0.07165	0.07693	0.05729	0.05962		5.9	40	2		372	0.00105	472	0.00573	472	0.00168	472	0.00148	472	0.00594
	55.446	0.03524	20.52	0.00588	20.52	1.01104	19.1668	2.01943	20.52	3.0012	57.636	0.02424			363	1.88689	2.2861	2.73775	3.77302	6.59878		473	0.15691	0.08385	0.09866	0.072	0.06208						373	0.00119	473	0.0072	473	0.00175	473	0.00115	473	0.00634
	57.695	0	20.56	0.00562	20.56	1.01023	19.3116	2.01896	20.56	3.00124	58.234	0.0404			364	1.86701	2.26609	2.71666	3.75376	6.48519		474	0.17474	0.0976	0.11542	0.09175	0.08104						374	0.00185	474	0.00917	474	0.00172	474	0.00176	474	0.0065
	60.074	0	20.6	0.00538	20.6	1.00945	19.4565	2.01776	20.6	3.00129	64.276	0			365	1.84527	2.23492	2.69684	3.71546	6.43507		475	0.19451	0.11488	0.14063	0.09794	0.09881						375	0.00153	475	0.00979	475	0.002	475	0.00189	475	0.00681
	60.197	0	20.64	0.00515	20.64	1.0087	19.6013	2.01791	20.64	3.00134	64.677	0.02424			366	1.82828	2.21859	2.66705	3.67779	6.36105		476	0.21687	0.13425	0.16459	0.12104	0.11964						376	0.00173	476	0.0121	476	0.00194	476	0.00189	476	0.00746
	62.72	0	20.6799	0.00493	20.6799	1.00798	19.7462	2.01919	20.6799	3.0014	67.526	0			367	1.80505	2.19667	2.63669	3.63171	6.26996		477	0.24041	0.15735	0.20165	0.14736	0.13162						377	0.00155	477	0.01474	477	0.00147	477	0.00187	477	0.00757
	63.979	0.03204	20.72	0.00472	20.72	1.00729	19.8911	2.01988	20.72	3.00146	71.903	0.00808			368	1.78933	2.18594	2.6106	3.58904	6.20403		478	0.26342	0.18178	0.23746	0.16724	0.16266						378	0.00202	478	0.01672	478	0.00181	478	0.00238	478	0.00759
	66.381	0	20.76	0.00453	20.76	1.00664	20.036	2.02298	20.76	3.00152	73.129	0			369	1.77349	2.16549	2.5868	3.55733	6.14451		479	0.28648	0.20928	0.27131	0.21472	0.18663						379	0.00201	479	0.02147	479	0.00194	479	0.00199	479	0.00787
	66.964	0.0128	20.8	0.00434	20.8	1.00601	20.1809	2.02384	20.8	3.00159	73.46	0.02424			370	1.75442	2.13903	2.56271	3.50944	6.06946		480	0.31268	0.24058	0.30902	0.26363	0.23132						380	0.00245	480	0.02636	480	0.00177	480	0.00147	480	0.00751
	68.988	0	20.84	0.00417	20.84	1.00542	20.3259	2.02529	20.84	3.00077	74.198	0			371	1.73731	2.12035	2.53235	3.47773	6.00024		481	0.33954	0.2731	0.36585	0.31125	0.27326						381	0.00276	481	0.03112	481	0.00231	481	0.00199	481	0.00785
	70.701	0.02804	20.88	0.00402	20.88	1.00485	20.4708	2.02614	20.88	3.0007	75.302	0			372	1.71986	2.09873	2.50513	3.43389	5.93321		482	0.36809	0.31193	0.4213	0.36699	0.3209						382	0.00281	482	0.0367	482	0.00217	482	0.00215	482	0.00853
	72.134	0.05284	20.92	0.00387	20.92	1.00432	20.6158	2.02881	20.92	3	75.654	0.00808			373	1.69893	2.08181	2.48489	3.40016	5.86005		483	0.39754	0.35248	0.48808	0.41745	0.36746						383	0.00331	483	0.04174	483	0.0021	483	0.00172	483	0.00901
	72.134	0.05284	20.96	0.00374	20.96	1.00382	20.7608	2.03029	20.96	3.00059	76.154	0.0404			374	1.68552	2.06416	2.45581	3.35781	5.80127		484	0.42956	0.39622	0.57784	0.46738	0.44398						384	0.00286	484	0.04674	484	0.00226	484	0.00283	484	0.00925
	72.64	0.0128	21	0.00362	21	1.00335	20.9058	2.03072	21	3.00067	81.924	0			375	1.66575	2.04299	2.42702	3.32024	5.72484		485	0.46104	0.44682	0.65222	0.55539	0.52315						385	0.00264	485	0.05554	485	0.00247	485	0.00198	485	0.00968
	73.35	0.0112	21.0399	0.00352	21.0399	1.00291	21.0508	2.03035	21.0399	3.00113	84.105	0.0404			376	1.6513	2.02269	2.40078	3.27853	5.66499		486	0.49275	0.49788	0.75239	0.65217	0.59976						386	0.00235	486	0.06522	486	0.00286	486	0.00207	486	0.01034
	74.911	0	21.08	0.00342	21.08	1.0025	21.1959	2.03126	21.08	3.00138					377	1.63535	2.00887	2.37584	3.24054	5.59243		487	0.52006	0.55475	0.85969	0.75424	0.69092						387	0.00266	487	0.07542	487	0.00296	487	0.00269	487	0.01006
	75.465	0.0096	21.12	0.00334	21.12	1.00212	21.3409	2.03169	21.12	3.00166					378	1.61998	1.98695	2.35218	3.2	5.51985		488	0.55157	0.61388	1.00268	0.88225	0.8191						388	0.00278	488	0.08823	488	0.00363	488	0.00286	488	0.01071
	77.395	0	21.16	0.00327	21.16	1.00178	21.486	2.0328	21.16	3.00202					379	1.60264	1.96916	2.3231	3.16605	5.46404		489	0.58391	0.67577	1.11346	1.04691	0.94345						389	0.00245	489	0.10469	489	0.00373	489	0.0031	489	0.01086
	78.782	0	21.2	0.00322	21.2	1.00146	21.6311	2.03136	21.2	3.00242					380	1.58842	1.95268	2.30101	3.1319	5.40855		490	0.61684	0.74038	1.26672	1.19285	1.10042						390	0.00278	490	0.11929	490	0.00435	490	0.00338	490	0.0104
	80.454	0	21.24	0.00317	21.24	1.00117	21.7762	2.03049	21.24	3.00295					381	1.57177	1.93666	2.27564	3.09667	5.33774		491	0.64943	0.80765	1.43197	1.37906	1.284						391	0.00217	491	0.13791	491	0.00446	491	0.00322	491	0.01071
	81.593	0.05124	21.28	0.00314	21.28	1.00092	21.9214	2.02815	21.28	3.00299					382	1.55478	1.92209	2.25084	3.06103	5.26894		492	0.68122	0.88145	1.62753	1.58694	1.49666						392	0.00288	492	0.15869	492	0.0048	492	0.00319	492	0.0101
	83.647	0.02324	21.32	0.00312	21.32	1.0007	22.0665	2.0269	21.32	3.00337					383	1.54264	1.90312	2.22931	3.02602	5.21668		493	0.71237	0.95432	1.79396	1.7765	1.694						393	0.00286	493	0.17765	493	0.00541	493	0.00278	493	0.00977
	85.531	0	21.36	0.00311	21.36	1.00051	22.2117	2.02532	21.36	3.00378					384	1.5275	1.88621	2.20351	2.99069	5.16429		494	0.74366	1.0299	2.00811	2.04194	1.93455						394	0.00302	494	0.20419	494	0.00558	494	0.00437	494	0.00894
	87.144	0.02644	21.4	0.00312	21.4	1.00034	22.3569	2.02288	21.4	3.00409					385	1.51108	1.87282	2.1827	2.95621	5.10605		495	0.77147	1.11115	2.23143	2.33563	2.21842						395	0.0029	495	0.23356	495	0.00615	495	0.00401	495	0.0079
	88.502	0.012	21.44	0.00314	21.44	1.00021	22.5021	2.02336	21.44	3.00485					386	1.4964	1.8565	2.16175	2.92088	5.04664		496	0.80151	1.19505	2.44552	2.62275	2.52341						396	0.00307	496	0.26227	496	0.0073	496	0.00451	496	0.00724
			21.48	0.00317	21.48	1.00011	22.6474	2.02659	21.48	3.00501					387	1.48149	1.8387	2.13695	2.88534	4.98449		497	0.82592	1.27972	2.67434	2.96419	2.9004						397	0.0031	497	0.29642	497	0.00829	497	0.00509	497	0.00709
			21.52	0.00321	21.52	1.00004	22.7926	2.03151	21.52	3.00598					388	1.46773	1.82297	2.11699	2.85576	4.92994		498	0.84918	1.36527	2.96077	3.32938	3.23977						398	0.0031	498	0.33294	498	0.01	498	0.00494	498	0.00697
			21.56	0.00327	21.56	1.00001	22.9379	2.03532	21.56	3.00618					389	1.45364	1.80782	2.09633	2.82001	4.86267		499	0.87368	1.45522	3.21159	3.65946	3.61558						399	0.00343	499	0.36595	499	0.01036	499	0.00538	499	0.00691
			21.6	0.00334	21.6	1	23.0832	2.04046	21.6	3.00576					390	1.44149	1.79738	2.07423	2.7884	4.81096		500	0.89715	1.54743	3.52382	4.10439	4.03598						400	0.0036	500	0.41044	500	0.01247	500	0.00617	500	0.00708
			21.64	0.00342	21.64	1.00002	23.2285	2.04685	21.64	3.00509					391	1.42867	1.77855	2.04915	2.75073	4.75608		501	0.91796	1.637	3.75716	4.50919	4.52976						401	0.00326	501	0.45092	501	0.01459	501	0.00706	501	0.0072
			21.6799	0.00351	21.6799	1.00008	23.3738	2.05415	21.6799	3.00543					392	1.41375	1.76458	2.03004	2.7187	4.69007		502	0.94019	1.7242	4.03495	4.96226	5.0204						402	0.00346	502	0.49623	502	0.01569	502	0.00715	502	0.00718
			21.72	0.00362	21.72	1.00016	23.5192	2.05807	21.72	3.00474					393	1.40011	1.74899	2.0051	2.68199	4.63169		503	0.96017	1.81065	4.32034	5.34422	5.51172						403	0.00338	503	0.53442	503	0.01755	503	0.00833	503	0.00752
			21.76	0.00374	21.76	1.00028	23.6645	2.06205	21.76	3.00513					394	1.38647	1.73502	1.98401	2.6507	4.56968		504	0.97719	1.8963	4.5906	5.88657	6.02348						404	0.00398	504	0.58866	504	0.02025	504	0.01013	504	0.00746
			21.8	0.00387	21.8	1.00043	23.8099	2.06571	21.8	3.00505					395	1.37214	1.71825	1.96291	2.61612	4.51392		505	0.99309	1.97683	4.90584	6.28286	6.52521						405	0.00396	505	0.62829	505	0.02297	505	0.00958	505	0.00734
			21.84	0.00401	21.84	1.00061	23.9553	2.07045	21.84	3.00488					396	1.35711	1.70207	1.94067	2.5809	4.44806		506	1.00551	2.0506	5.11508	6.76805	7.01536						406	0.00398	506	0.6768	506	0.02772	506	0.01111	506	0.00738
			21.88	0.00417	21.88	1.00082	24.1008	2.07391	21.88	3.00518					397	1.34416	1.6903	1.92172	2.54823	4.38885		507	1.01772	2.12453	5.44355	7.24111	7.47957						407	0.00384	507	0.72411	507	0.03011	507	0.01301	507	0.00674
			21.92	0.00434	21.92	1.00106	24.2462	2.08086	21.92	3.00484					398	1.33133	1.67178	1.89649	2.51301	4.32193		508	1.03398	2.1917	5.66301	7.66566	8.07275						408	0.00418	508	0.76657	508	0.03499	508	0.01426	508	0.00703
			21.96	0.00452	21.96	1.00133	24.3917	2.08645	21.96	3.00587					399	1.31734	1.65751	1.8771	2.47906	4.25901		509	1.04688	2.25135	5.88593	8.1262	8.49404						409	0.00446	509	0.81262	509	0.03856	509	0.01464	509	0.00787
			21.9999	0.00471	21.9999	1.00163	24.5372	2.09717	21.9999	3.00554					400	1.30463	1.64383	1.85686	2.44916	4.20377		510	1.06506	2.30495	6.09105	8.515	8.91032						410	0.00365	510	0.8515	510	0.04353	510	0.01714	510	0.00807
			22.04	0.00387	22.04	1.00256	24.6827	2.11055	22.04	3.00536					401	1.29111	1.62824	1.83662	2.41458	4.13717		511	1.07194	2.35395	6.19731	8.8949	9.30695						411	0.00394	511	0.88949	511	0.05145	511	0.01994	511	0.0083
			22.08	0.00423	22.08	1.00278	24.8283	2.12686	22.08	3.00567					402	1.27642	1.61442	1.81453	2.37882	4.07271		512	1.07844	2.39943	6.39595	9.21659	9.63994						412	0.00415	512	0.92166	512	0.05753	512	0.02215	512	0.00796
			22.12	0.0044	22.12	1.00333	24.9738	2.14373	22.12	3.00595					403	1.2637	1.6	1.79343	2.34754	4.00835		513	1.0838	2.42775	6.46869	9.41545	9.91585						413	0.00454	513	0.94154	513	0.06443	513	0.0257	513	0.00854
			22.16	0.00379	22.16	1.00527	25.1194	2.1646	22.16	3.00669					404	1.25134	1.58486	1.77333	2.3137	3.94348		514	1.08845	2.45435	6.59812	9.69779	10.1377						414	0.00398	514	0.96978	514	0.07373	514	0.02774	514	0.00971
			22.2	0.00348	22.2	1.00512	25.265	2.18928	22.2	3.00602					405	1.23655	1.57015	1.75167	2.28114	3.87839		515	1.08977	2.47613	6.60349	9.85173	10.2908						415	0.00425	515	0.98517	515	0.08324	515	0.03058	515	0.01046
			22.24	0.00229	22.24	1.00376	25.4106	2.21688	22.24	3.00603					406	1.22348	1.55544	1.73114	2.24911	3.81327		516	1.09202	2.48905	6.63865	9.94374	10.4303						416	0.00403	516	0.99437	516	0.09421	516	0.03418	516	0.012
			22.28	0.00223	22.28	1.00374	25.5563	2.24771	22.28	3.0059					407	1.21215	1.53956	1.71147	2.21761	3.74927		517	1.09369	2.49727	6.66667	10	10.5						417	0.00482	517	1	517	0.10511	517	0.03828	517	0.01313
			22.32	0.00242	22.32	1.00479	25.7019	2.2855	22.32	3.00673					408	1.19978	1.52809	1.69451	2.18707	3.68351		518	1.09809	2.5	6.55694	9.9058	10.4537						418	0.00485	518	0.99058	518	0.11757	518	0.04397	518	0.01387
			22.36	0.00267	22.36	1.00475	25.8476	2.33116	22.36	3.00722					409	1.18672	1.5147	1.67426	2.15706	3.62062		519	1.09965	2.49358	6.49311	9.91741	10.3546						419	0.00506	519	0.99174	519	0.13205	519	0.04754	519	0.01395
			22.4	0.00192	22.4	1.00686	25.9934	2.38015	22.4	3.00728					410	1.17481	1.49999	1.6546	2.12365	3.55318		520	1.10183	2.48125	6.38377	9.77857	10.1521						420	0.00497	520	0.97786	520	0.14857	520	0.05513	520	0.01398
			22.44	0.00204	22.44	1.00755	26.1391	2.43733	22.44	3.0073					411	1.16348	1.48529	1.63678	2.09439	3.49039		521	1.10683	2.4588	6.26737	9.57933	9.93108						421	0.00583	521	0.95793	521	0.16647	521	0.05933	521	0.01401
			22.48	0.00179	22.48	1.00813	26.2849	2.50079	22.48	3.00783					412	1.15054	1.4716	1.61725	2.06406	3.42456		522	1.11455	2.42925	6.13073	9.33196	9.63945						422	0.00576	522	0.9332	522	0.18642	522	0.0654	522	0.01293
			22.52	0.00205	22.52	1.00799	26.4306	2.571	22.52	3.00743					413	1.13944	1.45734	1.59886	2.03416	3.36013		523	1.12102	2.40122	5.92391	8.99684	9.31059						423	0.00674	523	0.89968	523	0.20018	523	0.07296	523	0.01204
			22.56	0.00261	22.56	1.00864	26.5764	2.64788	22.56	3.00777					414	1.12614	1.44455	1.57905	2.00575	3.2959		524	1.12456	2.3638	5.70183	8.74108	8.89578						424	0.00682	524	0.87411	524	0.22507	524	0.08136	524	0.01121
			22.6	0.00272	22.6	1.00895	26.7223	2.72652	22.6	3.00754					415	1.11574	1.43146	1.56223	1.97499	3.23195		525	1.13028	2.32268	5.51675	8.35564	8.46605						425	0.00739	525	0.83556	525	0.24874	525	0.09192	525	0.00984
			22.64	0.00196	22.64	1.00963	26.8681	2.80282	22.64	3.00825					416	1.1043	1.4172	1.54256	1.9452	3.1689		526	1.13799	2.27963	5.28426	8.00206	8.06421						426	0.00922	526	0.80021	526	0.2744	526	0.1019	526	0.00902
			22.6799	0.00197	22.6799	1.01018	27.014	2.87055	22.6799	3.00883					417	1.0917	1.40381	1.52546	1.91647	3.10531		527	1.14876	2.23555	5.05577	7.55894	7.64999						427	0.01015	527	0.75589	527	0.30605	527	0.11376	527	0.00792
			22.72	0.00249	22.72	1.01171	27.1599	2.92938	22.72	3.00916					418	1.0791	1.39086	1.50821	1.88806	3.04061		528	1.16049	2.18765	4.80868	7.1815	7.25061						428	0.01176	528	0.71815	528	0.3411	528	0.12852	528	0.00778
			22.76	0.00194	22.76	1.0123	27.3058	2.97396	22.76	3.00975					419	1.0687	1.37631	1.49011	1.8573	2.97238		529	1.17759	2.13737	4.53606	6.70069	6.82342						429	0.01464	529	0.67007	529	0.36878	529	0.14191	529	0.00745
			22.8	0.00194	22.8	1.01381	27.4518	2.9944	22.8	3.01039					420	1.05748	1.3616	1.47015	1.82602	2.907		530	1.1919	2.08515	4.29487	6.32892	6.3433						430	0.0162	530	0.63289	530	0.39521	530	0.15528	530	0.00657
			22.84	0.00302	22.84	1.01399	27.5977	3	22.84	3.01119					421	1.04488	1.34586	1.45019	1.79622	2.83875		531	1.20242	2.03648	4.01027	5.89883	5.94568						431	0.01949	531	0.58988	531	0.42499	531	0.17052	531	0.00607
			22.88	0.00409	22.88	1.0141	27.7437	2.98265	22.88	3.01118					422	1.03425	1.33336	1.43324	1.76834	2.77974		532	1.21934	1.9863	3.73542	5.47532	5.45839						432	0.02371	532	0.54753	532	0.45593	532	0.1848	532	0.00651
			22.92	0.00472	22.92	1.01575	27.8898	2.94606	22.92	3.01156					423	1.02396	1.32041	1.4147	1.73961	2.71902		533	1.2339	1.93217	3.51079	5.06046	5.04437						433	0.0275	533	0.50605	533	0.49236	533	0.20508	533	0.00784
			22.96	0.00538	22.96	1.01546	28.0358	2.89559	22.96	3.01139					424	1.01333	1.30556	1.39418	1.7096	2.6553		534	1.25272	1.8812	3.2823	4.56894	4.65176						434	0.03326	534	0.45689	534	0.52858	534	0.21979	534	0.009
			23	0.00586	23	1.01725	28.1819	2.83434	23	3.01193					425	1.00119	1.29277	1.37836	1.68321	2.59571		535	1.271	1.8325	3.09872	4.18956	4.27919						435	0.03946	535	0.41896	535	0.56649	535	0.24569	535	0.0092
			23.04	0.00664	23.04	1.01874	28.328	2.76555	23.04	3.01209					426	0.99124	1.27865	1.36139	1.65374	2.53506		536	1.29336	1.78405	2.93779	3.88077	3.91202						436	0.04726	536	0.38808	536	0.60466	536	0.26858	536	0.00985
			23.08	0.00755	23.08	1.01981	28.4741	2.6961	23.08	3.01167					427	0.98142	1.2638	1.34315	1.62575	2.47466		537	1.31551	1.73805	2.71866	3.59352	3.61234						437	0.05568	537	0.35935	537	0.63921	537	0.2922	537	0.01074
			23.12	0.00816	23.12	1.02134	28.6202	2.63189	23.12	3.01165					428	0.9709	1.25085	1.3259	1.59883	2.41491		538	1.33976	1.68825	2.50641	3.34705	3.29487						438	0.06542	538	0.33471	538	0.67932	538	0.32256	538	0.01114
			23.16	0.00916	23.16	1.02281	28.7664	2.57122	23.16	3.01117					429	0.96061	1.23659	1.30766	1.57255	2.3587		539	1.36505	1.63843	2.33029	3.02355	3.0002						439	0.07718	539	0.30235	539	0.72029	539	0.3503	539	0.01235
			23.1999	0.01011	23.1999	1.02374	28.9126	2.51727	23.1999	3.01057					430	0.95033	1.22218	1.29098	1.54509	2.30287		540	1.39258	1.5942	2.14115	2.81889	2.69452						440	0.0919	540	0.28189	540	0.75814	540	0.38112	540	0.01355
			23.24	0.01072	23.24	1.02427	29.0588	2.47458	23.24	3.01059					431	0.94015	1.20849	1.27216	1.51817	2.24472		541	1.42048	1.5517	1.95364	2.60675	2.48952						441	0.11102	541	0.26067	541	0.78938	541	0.40975	541	0.01524
			23.28	0.01217	23.28	1.02448	29.2051	2.43496	23.28	3.01054					432	0.93114	1.1957	1.25635	1.49199	2.18937		542	1.45398	1.51213	1.83049	2.31279	2.27706						442	0.12828	542	0.23128	542	0.8283	542	0.44354	542	0.01582
			23.32	0.01284	23.32	1.02534	29.3513	2.40268	23.32	3.0103					433	0.92246	1.18231	1.24038	1.46752	2.13753		543	1.48091	1.47553	1.67722	2.15098	2.06981						443	0.14969	543	0.2151	543	0.85954	543	0.47481	543	0.01737
			23.36	0.0146	23.36	1.02596	29.4976	2.37625	23.36	3.01136					434	0.9138	1.16879	1.2237	1.44219	2.0853		544	1.50567	1.43758	1.52867	1.948	1.90567						444	0.17333	544	0.1948	544	0.89151	544	0.50892	544	0.01902
			23.4	0.01548	23.4	1.02868	29.644	2.35375	23.4	3.01082					435	0.90501	1.15585	1.20845	1.41921	2.03491		545	1.53907	1.4061	1.41272	1.76502	1.70686						445	0.20222	545	0.1765	545	0.91513	545	0.54763	545	0.01977
			23.44	0.01671	23.44	1.02972	29.7903	2.33229	23.44	3.01075					436	0.89484	1.14201	1.19277	1.39441	1.97992		546	1.57035	1.375	1.29547	1.61249	1.56453						446	0.23208	546	0.16125	546	0.9335	546	0.5782	546	0.02168
			23.48	0.0186	23.48	1.03123	29.9367	2.31462	23.48	3.01045					437	0.88674	1.12834	1.17624	1.37058	1.92847		547	1.6008	1.3463	1.20571	1.52474	1.44804						447	0.26311	547	0.15247	547	0.9544	547	0.61389	547	0.02374
			23.52	0.02009	23.52	1.03454	30.0831	2.29861	23.52	3.01005					438	0.87808	1.11569	1.16127	1.34759	1.88057		548	1.63266	1.32057	1.11287	1.38086	1.32015						448	0.30125	548	0.13809	548	0.9702	548	0.64586	548	0.02512
			23.56	0.02208	23.56	1.03413	30.2295	2.28345	23.56	3.01013					439	0.86964	1.10378	1.14745	1.32588	1.83565		549	1.66655	1.30035	1.01918	1.27092	1.19845						449	0.3407	549	0.12709	549	0.98616	549	0.68596	549	0.02666
			23.6	0.02441	23.6	1.03636	30.376	2.26739	23.6	3.01023					440	0.86189	1.09142	1.13176	1.30428	1.78813		550	1.69234	1.2779	0.9414	1.15504	1.09256						450	0.38263	550	0.1155	550	0.9931	550	0.72131	550	0.02946
			23.64	0.02649	23.64	1.03863	30.5225	2.25172	23.64	3.00999					441	0.85368	1.08011	1.11823	1.28268	1.74055		551	1.72261	1.2636	0.85511	1.07078	1.01359						451	0.42463	551	0.10708	551	1	551	0.7469	551	0.03212
			23.6799	0.02865	23.6799	1.03851	30.669	2.23695	23.6799	3.00972					442	0.84478	1.06745	1.1024	1.2598	1.69508		552	1.75159	1.2465	0.80188	0.96613	0.93923						452	0.4716	552	0.09661	552	0.99778	552	0.78326	552	0.03493
			23.72	0.03132	23.72	1.04059	30.8155	2.22304	23.72	3.00904					443	0.836	1.05466	1.08715	1.23756	1.65071		553	1.77829	1.23045	0.74021	0.91206	0.8632						453	0.51801	553	0.09121	553	0.99824	553	0.81165	553	0.03828
			23.76	0.0334	23.76	1.04139	30.9621	2.20886	23.76	3.0092					444	0.82814	1.04289	1.07332	1.21649	1.60442		554	1.80846	1.21278	0.69425	0.83889	0.79572						454	0.56582	554	0.08389	554	0.98878	554	0.84751	554	0.04151
			23.8	0.03664	23.8	1.04246	31.1087	2.1937	23.8	3.0094					445	0.81958	1.02951	1.0585	1.19383	1.55858		555	1.83729	1.20107	0.63722	0.81128	0.71881						455	0.61418	555	0.08113	555	0.97243	555	0.86841	555	0.04426
			23.84	0.04005	23.84	1.04166	31.2553	2.17979	23.84	3.00993					446	0.81126	1.0176	1.04453	1.17329	1.51644		556	1.86923	1.18663	0.60213	0.74237	0.68129						456	0.65831	556	0.07424	556	0.96441	556	0.89918	556	0.04796
			23.88	0.04345	23.88	1.04254	31.402	2.16754	23.88	3.01003					447	0.80294	1.00583	1.03028	1.15392	1.4729		557	1.89747	1.17338	0.56364	0.69243	0.62786						457	0.70775	557	0.06924	557	0.94748	557	0.91938	557	0.05355
			23.92	0.04759	23.92	1.04435	31.5486	2.15712	23.92	3.01044					448	0.79496	0.9923	1.01531	1.13296	1.43128		558	1.93176	1.15815	0.53044	0.65475	0.59014						458	0.75599	558	0.06548	558	0.92494	558	0.93986	558	0.05932
			23.96	0.05101	23.96	1.04526	31.6953	2.14686	23.96	3.01					449	0.78698	0.98127	1.00177	1.11434	1.39089		559	1.96388	1.1469	0.49326	0.59952	0.55546						459	0.79943	559	0.05995	559	0.90134	559	0.96126	559	0.06509
			24	0.0548	24	1.04632	31.8421	2.13663	24	3.00942					450	0.77843	0.96833	0.98723	1.0937	1.35087		560	1.99354	1.1373	0.44991	0.55604	0.51038						460	0.83467	560	0.0556	560	0.86795	560	0.97122	560	0.06996
			24.04	0.05919	24.04	1.04665	31.9888	2.12634	24.04	3.00901					451	0.76999	0.95715	0.97355	1.0739	1.31069		561	2.02561	1.12492	0.42156	0.55229	0.47345						461	0.87427	561	0.05523	561	0.85023	561	0.98762	561	0.07639
			24.08	0.06315	24.08	1.04806	32.1356	2.11883	24.08	3.00879					452	0.76179	0.94479	0.96043	1.05507	1.275		562	2.05876	1.11323	0.39917	0.52287	0.44614						462	0.90494	562	0.05229	562	0.816	562	0.98702	562	0.0834
			24.12	0.06731	24.12	1.0486	32.2825	2.10992	24.12	3.00875					453	0.753	0.93288	0.94731	1.03666	1.2381		563	2.08685	1.10115	0.37063	0.49435	0.43838						463	0.93357	563	0.04944	563	0.78713	563	0.99818	563	0.09064
			24.16	0.07216	24.16	1.05046	32.4293	2.10251	24.16	3.00873					454	0.7441	0.92141	0.93349	1.01921	1.20589		564	2.12038	1.09137	0.36087	0.47151	0.40665						464	0.95618	564	0.04715	564	0.75337	564	0.99945	564	0.09811
			24.1999	0.0776	24.1999	1.05301	32.5762	2.09487	24.1999	3.00936					455	0.73589	0.91067	0.9218	1.00197	1.17566		565	2.15346	1.08572	0.343	0.45022	0.3874						465	0.97055	565	0.04502	565	0.71559	565	1	565	0.10734
			24.24	0.08411	24.24	1.05553	32.7231	2.08775	24.24	3.01011					456	0.72757	0.89906	0.90855	0.98441	1.14218		566	2.18067	1.07332	0.31662	0.43177	0.36432						466	0.98615	566	0.04318	566	0.68156	566	0.9909	566	0.11757
			24.28	0.08945	24.28	1.05734	32.87	2.0819	24.28	3.01095					457	0.71844	0.88862	0.896	0.96834	1.11459		567	2.20717	1.06397	0.30549	0.4088	0.35106						467	0.99335	567	0.04088	567	0.64427	567	0.97814	567	0.128
			24.32	0.09594	24.32	1.06004	33.017	2.07594	24.32	3.01122					458	0.70965	0.87758	0.88418	0.95174	1.08672		568	2.23114	1.05603	0.29488	0.39203	0.34065						468	1	568	0.0392	568	0.6149	568	0.97209	568	0.13932
			24.36	0.10167	24.36	1.06214	33.164	2.06798	24.36	3.01213					459	0.70098	0.86641	0.87135	0.93536	1.0585		569	2.25135	1.05255	0.28578	0.38338	0.32503						469	0.99225	569	0.03834	569	0.5779	569	0.946	569	0.15175
			24.4	0.10754	24.4	1.0651	33.311	2.06206	24.4	3.01304					460	0.69255	0.85582	0.85894	0.91918	1.03161		570	2.26794	1.04582	0.26804	0.37731	0.32699						470	0.98735	570	0.03773	570	0.54109	570	0.92898	570	0.16382
			24.44	0.11415	24.44	1.06735	33.4581	2.05513	24.44	3.01401					461	0.68202	0.84464	0.84712	0.90343	1.00818		571	2.28647	1.04343	0.2662	0.35035	0.30666						471	0.97221	571	0.03503	571	0.50795	571	0.90854	571	0.17474
			24.48	0.12189	24.48	1.07241	33.6052	2.05143	24.48	3.01472					462	0.67266	0.83317	0.834	0.88715	0.98299		572	2.30319	1.03578	0.26247	0.34647	0.28554						472	0.95865	572	0.03465	572	0.47622	572	0.88226	572	0.18814
			24.52	0.13026	24.52	1.0749	33.7523	2.04502	24.52	3.01526					463	0.66341	0.82302	0.82331	0.87289	0.96132		573	2.32193	1.02713	0.24087	0.35693	0.27945						473	0.9273	573	0.03569	573	0.44669	573	0.85535	573	0.20176
			24.56	0.13858	24.56	1.07775	33.8995	2.04122	24.56	3.0161					464	0.65452	0.81258	0.81148	0.85863	0.94012		574	2.33669	1.02118	0.23118	0.32273	0.27582						474	0.90299	574	0.03227	574	0.42143	574	0.82175	574	0.21544
			24.6	0.14646	24.6	1.08022	34.0467	2.03632	24.6	3.01876					465	0.6448	0.80111	0.79922	0.84331	0.91825		575	2.34944	1.0137	0.22633	0.32557	0.25823						475	0.87777	575	0.03256	575	0.39049	575	0.79202	575	0.23105
			24.64	0.15375	24.64	1.08312	34.1939	2.03114	24.64	3.01867					466	0.63474	0.7914	0.78768	0.82841	0.89704		576	2.36342	1.0061	0.21946	0.30763	0.25038						476	0.85521	576	0.03076	576	0.36057	576	0.75362	576	0.24817
			24.68	0.16259	24.68	1.08748	34.3411	2.02829	24.68	3.01971					467	0.62423	0.78037	0.7757	0.81362	0.87749		577	2.37513	0.99798	0.20446	0.28273	0.25106						477	0.83054	577	0.02827	577	0.33891	577	0.71944	577	0.2659
			24.7199	0.17195	24.7199	1.08965	34.4884	2.02419	24.7199	3.02082					468	0.61336	0.76948	0.76416	0.80043	0.85796		578	2.39129	0.98962	0.21638	0.2946	0.25047						478	0.79631	578	0.02946	578	0.31357	578	0.68234	578	0.28296
			24.76	0.18182	24.76	1.09573	34.6357	2.02156	24.76	3.02252					469	0.60342	0.75905	0.7519	0.78521	0.84007		579	2.40199	0.9824	0.20512	0.28195	0.23515						479	0.75933	579	0.0282	579	0.2917	579	0.65294	579	0.30064
			24.8	0.191	24.8	1.10063	34.7831	2.02059	24.8	3.02354					470	0.59209	0.74772	0.73979	0.7701	0.82011		580	2.41746	0.9731	0.20532	0.26724	0.22739						480	0.7205	580	0.02672	580	0.26986	580	0.61116	580	0.31994
			24.84	0.20059	24.84	1.10565	34.9304	2.02009	24.84	3.02529					471	0.58099	0.73698	0.72824	0.75616	0.80214		581	2.43266	0.9625	0.18901	0.27279	0.2267						481	0.69071	581	0.02728	581	0.24728	581	0.5716	581	0.34185
			24.88	0.21137	24.88	1.11046	35.0778	2.02137	24.88	3.02768					472	0.56955	0.72669	0.71654	0.74286	0.7852		582	2.44371	0.95383	0.18332	0.26789	0.21845						482	0.65807	582	0.02679	582	0.22831	582	0.5327	582	0.36493
			24.92	0.22215	24.92	1.1174	35.2253	2.02013	24.92	3.02899					473	0.55741	0.71492	0.70344	0.72807	0.76723		583	2.4563	0.9447	0.1822	0.27744	0.21217						483	0.62251	583	0.02774	583	0.21098	583	0.5014	583	0.38799
			24.96	0.23422	24.96	1.12341	35.3727	2.02086	24.96	3.03151					474	0.5455	0.70374	0.69174	0.71423	0.7497		584	2.46829	0.93528	0.17782	0.24698	0.22189						484	0.58756	584	0.0247	584	0.19743	584	0.46756	584	0.4126
			25	0.24594	25	1.12938	35.5202	2.01979	25	3.0328					475	0.53336	0.69227	0.67921	0.70029	0.73301		585	2.47858	0.92665	0.1805	0.24505	0.20991						485	0.55881	585	0.0245	585	0.18557	585	0.43816	585	0.43895
			25.04	0.25783	25.04	1.13464	35.6678	2.01813	25.04	3.03516					476	0.52146	0.6808	0.66751	0.68646	0.71734		586	2.48806	0.91463	0.17454	0.25124	0.20726						486	0.52519	586	0.02512	586	0.16943	586	0.40634	586	0.46695
			25.08	0.26953	25.08	1.13873	35.8153	2.01822	25.08	3.03748					477	0.50967	0.67006	0.65582	0.67263	0.70146		587	2.4931	0.90845	0.17389	0.25163	0.20038						487	0.49468	587	0.02516	587	0.15727	587	0.37538	587	0.49677
			25.12	0.28134	25.12	1.14581	35.9629	2.01558	25.12	3.04035					478	0.49649	0.658	0.64314	0.65858	0.68385		588	2.49871	0.89968	0.1663	0.2475	0.20293						488	0.46735	588	0.02475	588	0.14455	588	0.3504	588	0.52683
			25.16	0.29268	25.16	1.15334	36.1106	2.01511	25.16	3.04333					479	0.48377	0.64697	0.63116	0.6457	0.66878		589	2.5	0.8924	0.15916	0.23343	0.19616						489	0.43891	589	0.02334	589	0.13371	589	0.32145	589	0.55801
			25.1999	0.3057	25.1999	1.16104	36.2583	2.01316	25.1999	3.04653					480	0.47129	0.63594	0.6202	0.63272	0.65378		590	2.49777	0.88538	0.16577	0.22518	0.18869						490	0.41608	590	0.02252	590	0.12417	590	0.29316	590	0.58687
			25.24	0.31932	25.24	1.17005	36.406	2.01176	25.24	3.049					481	0.45869	0.62447	0.60822	0.61942	0.63889		591	2.49686	0.87735	0.16171	0.23395	0.1882						491	0.39146	591	0.0234	591	0.11688	591	0.27189	591	0.61709
			25.28	0.33278	25.28	1.18078	36.5537	2.01165	25.28	3.05344					482	0.44539	0.61329	0.5961	0.60686	0.62299		592	2.4912	0.8668	0.15445	0.21834	0.18869						492	0.36821	592	0.02183	592	0.10522	592	0.25027	592	0.64804
			25.32	0.34795	25.32	1.18963	36.7015	2.00957	25.32	3.05699					483	0.43303	0.60197	0.58484	0.59356	0.60866		593	2.48599	0.85748	0.15523	0.22492	0.18624						493	0.34956	593	0.02249	593	0.09984	593	0.22893	593	0.67928
			25.36	0.36191	25.36	1.19888	36.8493	2.00969	25.36	3.06186					484	0.41996	0.5905	0.57358	0.58122	0.59494		594	2.47428	0.85003	0.15569	0.21434	0.17995						494	0.3317	594	0.02143	594	0.09412	594	0.20892	594	0.7122
			25.4	0.37666	25.4	1.2113	36.9971	2.00793	25.4	3.06617					485	0.40714	0.5799	0.56175	0.56951	0.58145		595	2.45962	0.83907	0.14456	0.2226	0.17592						495	0.31356	595	0.02226	595	0.08534	595	0.19231	595	0.74464
			25.44	0.39156	25.44	1.22337	37.145	2.00539	25.44	3.07096					486	0.39442	0.56858	0.55106	0.5576	0.56697		596	2.45094	0.83242	0.15098	0.19975	0.16443						496	0.29834	596	0.01998	596	0.08041	596	0.17575	596	0.77636
			25.48	0.40631	25.48	1.23489	37.2929	2.00436	25.48	3.07447					487	0.38159	0.55785	0.54037	0.54589	0.55548		597	2.44351	0.82473	0.14338	0.20376	0.16718						497	0.2813	597	0.02038	597	0.07434	597	0.15912	597	0.8074
			25.52	0.42112	25.52	1.24748	37.4408	2.00117	25.52	3.07914					488	0.36945	0.54637	0.52982	0.53387	0.54285		598	2.43817	0.81695	0.14541	0.19834	0.16934						498	0.2699	598	0.01983	598	0.07056	598	0.14693	598	0.8347
			25.56	0.4355	25.56	1.26159	37.5888	2.0007	25.56	3.0846					489	0.35616	0.53461	0.5187	0.52216	0.53002		599	2.42457	0.80803	0.14174	0.19304	0.16413						499	0.25721	599	0.0193	599	0.06566	599	0.13236	599	0.86107
			25.6	0.4508	25.6	1.27478	37.7368	2	25.6	3.08904					490	0.34333	0.52358	0.50801	0.51099	0.51798		600	2.41215	0.79995	0.13919	0.20053	0.1605						500	0.24734	600	0.02005	600	0.06301	600	0.12247	600	0.88774
			25.64	0.46702	25.64	1.28796	37.8849	2	25.64	3.09552					491	0.33084	0.51166	0.49732	0.49992	0.50525		601	2.39291	0.7898	0.13402	0.17743	0.15657						501	0.23553	601	0.01774	601	0.05837	601	0.1146	601	0.91165
			25.68	0.48353	25.68	1.30216	38.033	2.00137	25.68	3.10146					492	0.31778	0.49975	0.48663	0.48853	0.4932		602	2.37248	0.78013	0.12911	0.1915	0.15166						502	0.22485	602	0.01915	602	0.05504	602	0.10512	602	0.93224
			25.7199	0.50019	25.7199	1.31638	38.1811	2.0031	25.7199	3.10861					493	0.3046	0.48828	0.4758	0.47672	0.48165		603	2.35793	0.76865	0.1276	0.1835	0.15323						503	0.22092	603	0.01835	603	0.0531	603	0.09619	603	0.94905
			25.76	0.51623	25.76	1.33243	38.3293	2.00732	25.76	3.11437					494	0.29223	0.47592	0.46511	0.46608	0.46972		604	2.34337	0.75853	0.13336	0.18892	0.14606						504	0.20969	604	0.01889	604	0.0502	604	0.08844	604	0.96699
			25.8	0.53209	25.8	1.34981	38.4775	2.01068	25.8	3.12119					495	0.27905	0.46328	0.45385	0.45459	0.45677		605	2.32845	0.74938	0.12407	0.17808	0.13624						505	0.20213	605	0.01781	605	0.0477	605	0.08306	605	0.98113
			25.84	0.54858	25.84	1.36637	38.6257	2.01337	25.84	3.12879					496	0.26633	0.45063	0.4433	0.44374	0.44439		606	2.30953	0.7408	0.12878	0.17769	0.14311						506	0.19836	606	0.01777	606	0.04478	606	0.07601	606	0.99129
			25.88	0.56385	25.88	1.38373	38.7739	2.01482	25.88	3.1377					497	0.25373	0.43799	0.43232	0.43203	0.4328		607	2.29178	0.73152	0.12511	0.17266	0.13624						507	0.19094	607	0.01727	607	0.04335	607	0.07063	607	0.99849
			25.92	0.58151	25.92	1.40284	38.9223	2.01531	25.92	3.14668					498	0.24171	0.42548	0.42135	0.4215	0.42086		608	2.27658	0.71963	0.12335	0.16272	0.1383						508	0.1866	608	0.01627	608	0.04046	608	0.06662	608	0.9998
			25.96	0.5987	25.96	1.42004	39.0706	2.01558	25.96	3.1569					499	0.22958	0.41254	0.41038	0.41075	0.40979		609	2.25684	0.70967	0.11693	0.15756	0.13909						509	0.18062	609	0.01576	609	0.0396	609	0.06046	609	1
			26	0.615	26	1.43745	39.219	2.01429	26	3.1687					500	0.21802	0.40004	0.39997	0.4	0.39843		610	2.23112	0.70178	0.11889	0.15962	0.13506						510	0.17738	610	0.01596	610	0.03878	610	0.05784	610	0.99402
			26.04	0.6307	26.04	1.45764	39.3674	2.01149	26.04	3.1795					501	0.20658	0.38636	0.38886	0.38904	0.36476		611	2.21058	0.68915	0.11634	0.15343	0.1329						511	0.17354	611	0.01534	611	0.03726	611	0.05299	611	0.98466
			26.08	0.6476	26.08	1.4768	39.5158	2.00837	26.08	3.19132					502	0.19559	0.37356	0.37816	0.37829	0.37401		612	2.18808	0.67822	0.11582	0.14943	0.13545						512	0.17054	612	0.01494	612	0.0357	612	0.04829	612	0.97128
			26.12	0.66384	26.12	1.49552	39.6643	2.00802	26.12	3.20209					503	0.18449	0.36018	0.3669	0.36691	0.36277		613	2.16494	0.6676	0.11339	0.14698	0.12514						513	0.16646	613	0.0147	613	0.03449	613	0.04519	613	0.95662
			26.16	0.68018	26.16	1.51392	39.8129	2.00751	26.16	3.21452					504	0.17398	0.34621	0.35578	0.35552	0.3517		614	2.13811	0.65805	0.1092	0.14259	0.12416						514	0.16471	614	0.01426	614	0.0337	614	0.04466	614	0.93925
			26.2	0.69685	26.2	1.53279	39.9614	2.0086	26.2	3.2287					505	0.16345	0.33297	0.34509	0.34467	0.33929		615	2.11179	0.64803	0.10829	0.14014	0.12259						515	0.16133	615	0.01401	615	0.03258	615	0.0409	615	0.91905
			26.24	0.71377	26.24	1.55349	40.11	2.00746	26.24	3.24223					506	0.15363	0.31988	0.33383	0.33381	0.32823		616	2.09148	0.63832	0.10187	0.14091	0.11915						516	0.1578	616	0.01409	616	0.03224	616	0.03708	616	0.89714
			26.28	0.73081	26.28	1.57322	40.2587	2.00804	26.28	3.26017					507	0.14496	0.30753	0.32314	0.32306	0.31675		617	2.06827	0.62865	0.10122	0.13317	0.11276						517	0.15679	617	0.01332	617	0.03024	617	0.03554	617	0.8713
			26.3199	0.74643	26.3199	1.59544	40.4074	2.00839	26.3199	3.27838					508	0.13583	0.29474	0.31259	0.31221	0.30497		618	2.04573	0.61783	0.09703	0.13575	0.11522						518	0.15573	618	0.01358	618	0.02965	618	0.03362	618	0.8399
			26.36	0.76106	26.36	1.61607	40.5561	2.00769	26.36	3.2968					509	0.12681	0.28149	0.30105	0.30104	0.29261		619	2.01377	0.6088	0.10299	0.12414	0.11119						519	0.15084	619	0.01241	619	0.0298	619	0.03146	619	0.8088
			26.4	0.77652	26.4	1.63742	40.7048	2.00865	26.4	3.3161					510	0.1193	0.26885	0.29036	0.29029	0.28098		620	1.98077	0.59683	0.09768	0.12452	0.10874						520	0.15043	620	0.01245	620	0.02939	620	0.02974	620	0.77935
			26.44	0.79216	26.44	1.65788	40.8536	2.0086	26.44	3.33673					511	0.11167	0.25649	0.27952	0.27912	0.26914		621	1.95002	0.58485	0.09395	0.11949	0.0997						521	0.14745	621	0.01195	621	0.02869	621	0.02971	621	0.74692
			26.48	0.80657	26.48	1.67795	41.0025	2.00817	26.48	3.35784					512	0.10358	0.24385	0.26855	0.26784	0.25641		622	1.92114	0.57313	0.095	0.11227	0.10284						522	0.14589	622	0.01123	622	0.02723	622	0.02753	622	0.71415
			26.52	0.8206	26.52	1.69852	41.1514	2.0093	26.52	3.37895					513	0.09698	0.23193	0.258	0.25698	0.24497		623	1.89353	0.5594	0.09395	0.11459	0.0998						523	0.14505	623	0.01146	623	0.02722	623	0.02609	623	0.68431
			26.56	0.8347	26.56	1.7186	41.3003	2.00984	26.56	3.40202					514	0.09017	0.21914	0.2466	0.24528	0.23297		624	1.86523	0.54823	0.09028	0.11485	0.10048						524	0.14088	624	0.01148	624	0.02618	624	0.02604	624	0.6546
			26.6	0.84779	26.6	1.73895	41.4492	2.0112	26.6	3.42753					515	0.08404	0.20782	0.23591	0.23464	0.2194		625	1.83461	0.53718	0.08171	0.11007	0.08988						525	0.13997	625	0.01101	625	0.02581	625	0.02424	625	0.62273
			26.64	0.86083	26.64	1.75986	41.5982	2.01289	26.64	3.45472					516	0.07826	0.19678	0.22507	0.22336	0.20796		626	1.80581	0.52735	0.08557	0.10788	0.08909						526	0.13956	626	0.01079	626	0.02565	626	0.02282	626	0.59068
			26.68	0.87369	26.68	1.77805	41.7473	2.01869	26.68	3.48225					517	0.07295	0.18561	0.21453	0.21272	0.19808		627	1.77594	0.51573	0.08256	0.10207	0.08624						527	0.13562	627	0.01021	627	0.0261	627	0.02285	627	0.56127
			26.72	0.88568	26.72	1.7952	41.8964	2.02265	26.72	3.50899					518	0.06739	0.17457	0.20327	0.2008	0.18556		628	1.74413	0.50445	0.08125	0.10362	0.0885						528	0.13425	628	0.01036	628	0.02557	628	0.02198	628	0.53117
			26.76	0.89741	26.76	1.81148	42.0455	2.02634	26.76	3.53576					519	0.06277	0.16369	0.19286	0.19005	0.17387		629	1.71194	0.49583	0.08256	0.11007	0.08418						529	0.13267	629	0.01101	629	0.02458	629	0.021	629	0.50237
			26.8	0.90892	26.8	1.82766	42.1947	2.03329	26.8	3.5658					520	0.05768	0.15281	0.18189	0.17856	0.16207		630	1.67535	0.48453	0.07811	0.0973	0.08506						530	0.13089	630	0.00973	630	0.02508	630	0.02066	630	0.47479
			26.84	0.91985	26.84	1.84317	42.3439	2.04091	26.84	3.59489					521	0.05352	0.1431	0.17162	0.1677	0.15229		631	1.64387	0.47215	0.07307	0.09523	0.08339						531	0.13005	631	0.00952	631	0.02429	631	0.01973	631	0.4473
			26.88	0.92947	26.88	1.85982	42.4931	2.04695	26.88	3.62392					522	0.04924	0.13383	0.16221	0.15728	0.14028		632	1.61013	0.46337	0.07876	0.09833	0.08133						532	0.12624	632	0.00983	632	0.024	632	0.01836	632	0.42155
			26.92	0.93765	26.92	1.87587	42.6424	2.05337	26.92	3.65259					523	0.04543	0.12413	0.15181	0.14663	0.13044		633	1.5767	0.45328	0.07228	0.08865	0.07691						533	0.12504	633	0.00887	633	0.0227	633	0.01802	633	0.3979
			26.96	0.94669	26.96	1.88993	42.7917	2.06077	26.96	3.68067					524	0.04173	0.11575	0.1424	0.13684	0.12087		634	1.54401	0.44435	0.07195	0.09239	0.07495						534	0.12228	634	0.00924	634	0.02237	634	0.01738	634	0.37604
			26.9999	0.95468	26.9999	1.903	42.9411	2.06916	26.9999	3.70944					525	0.03861	0.10765	0.13342	0.12737	0.11163		635	1.51009	0.43487	0.07051	0.09291	0.0775						535	0.12108	635	0.00929	635	0.02248	635	0.0181	635	0.35428
			27.04	0.96224	27.04	1.91522	43.0905	2.08058	27.04	3.73857					526	0.03526	0.09987	0.12487	0.11865	0.1023		636	1.47902	0.4266	0.06351	0.08401	0.06866						536	0.11887	636	0.0084	636	0.02252	636	0.01699	636	0.33351
			27.08	0.96925	27.08	1.92678	43.24	2.09473	27.08	3.7641					527	0.03248	0.09207	0.11617	0.1096	0.09315		637	1.44667	0.42008	0.06252	0.08362	0.07662						537	0.11762	637	0.00836	637	0.02259	637	0.01706	637	0.31323
			27.12	0.97512	27.12	1.93819	43.3895	2.1097	27.12	3.79205					528	0.02959	0.08486	0.10819	0.10109	0.08662		638	1.41863	0.41197	0.06279	0.07871	0.07927						538	0.11407	638	0.00787	638	0.0225	638	0.01675	638	0.2942
			27.16	0.98062	27.16	1.94628	43.539	2.12657	27.16	3.81809					529	0.0274	0.07898	0.10135	0.09354	0.07919		639	1.38725	0.40528	0.06135	0.08362	0.07328						539	0.11376	639	0.00836	639	0.02191	639	0.01661	639	0.27784
			27.2	0.98523	27.2	1.95475	43.6886	2.14558	27.2	3.84179					530	0.02543	0.07324	0.09437	0.08683	0.07236		640	1.3588	0.39665	0.05925	0.07407	0.072						540	0.11273	640	0.00741	640	0.02272	640	0.01536	640	0.26471
			27.24	0.98917	27.24	1.96307	43.8382	2.16713	27.24	3.86578					531	0.02277	0.06795	0.08824	0.08034	0.06606		641	1.33427	0.38983	0.05611	0.07136	0.06581						541	0.10822	641	0.00714	641	0.02213	641	0.01546	641	0.25121
			27.28	0.99241	27.28	1.97183	43.9879	2.18395	27.28	3.88812					532	0.02116	0.0628	0.08211	0.0747	0.06082		642	1.31308	0.3808	0.05355	0.07549	0.06984						542	0.10682	642	0.00755	642	0.02125	642	0.01474	642	0.23949
			27.32	0.9949	27.32	1.97661	44.1376	2.19965	27.32	3.90953					533	0.01942	0.0575	0.07597	0.06832	0.05463		643	1.2928	0.37518	0.05781	0.07549	0.06002						543	0.10543	643	0.00755	643	0.02166	643	0.01397	643	0.23051
			27.36	0.99788	27.36	1.9842	44.2874	2.21347	27.36	3.92659					534	0.01758	0.05412	0.07156	0.06374	0.05064		644	1.27325	0.36762	0.04891	0.06658	0.05609						544	0.1043	644	0.00666	644	0.02178	644	0.01526	644	0.21917
			27.4	0.99861	27.4	1.98911	44.4372	2.22212	27.4	3.94462					535	0.01618	0.0503	0.06657	0.05927	0.04602		645	1.24973	0.36138	0.05303	0.07123	0.05962						545	0.10008	645	0.00712	645	0.02116	645	0.01404	645	0.20957
			27.44	0.99953	27.44	1.99239	44.587	2.22932	27.44	3.96033					536	0.01492	0.04677	0.0613	0.05406	0.04084		646	1.22695	0.35458	0.05663	0.0631	0.06267						546	0.09931	646	0.00631	646	0.0203	646	0.01488	646	0.2001
			27.48	1	27.48	1.99583	44.7369	2.23026	27.48	3.9725					537	0.01353	0.04368	0.05716	0.04863	0.03625		647	1.20348	0.34778	0.05074	0.06388	0.06021						547	0.09574	647	0.00639	647	0.02026	647	0.01404	647	0.19175
			27.52	0.99924	27.52	1.99789	44.8868	2.23125	27.52	3.98297					538	0.0126	0.04074	0.05303	0.0448	0.03288		648	1.18191	0.34295	0.04982	0.068	0.05363						548	0.09694	648	0.0068	648	0.02008	648	0.01318	648	0.18323
			27.56	0.99838	27.56	1.99889	45.0368	2.23286	27.56	3.9909					539	0.0111	0.03839	0.05003	0.04182	0.03027		649	1.161	0.33797	0.04845	0.068	0.05658						549	0.09377	649	0.0068	649	0.02078	649	0.01361	649	0.17519
			27.6	0.99591	27.6	2	45.1868	2.23351	27.6	3.99692					540	0.01017	0.03618	0.04718	0.03905	0.02768		650	1.13999	0.32927	0.04459	0.05497	0.05088						550	0.09077	650	0.0055	650	0.0201	650	0.01354	650	0.16936
			27.64	0.99308	27.64	1.99938	45.3369	2.23795	27.64	4					541	0.00936	0.03412	0.0439	0.03629	0.0255		651	1.11925	0.32375	0.044	0.06233	0.06188						551	0.08897	651	0.00623	651	0.02041	651	0.01322	651	0.16222
			27.6799	0.98999	27.6799	1.99648	45.487	2.24324	27.6799	3.99882					542	0.00844	0.03236	0.04191	0.03426	0.02259		652	1.0968	0.3187	0.04662	0.06413	0.04499						552	0.08647	652	0.00641	652	0.02069	652	0.01358	652	0.15512
			27.72	0.98626	27.72	1.9952	45.6372	2.25215	27.72	3.99534					543	0.00705	0.03118	0.03978	0.03214	0.02166		653	1.07682	0.31095	0.04085	0.05716	0.04813						553	0.08556	653	0.00572	653	0.01947	653	0.01164	653	0.14832
			27.76	0.9818	27.76	1.99096	45.7874	2.26289	27.76	3.99092					544	0.00648	0.02897	0.03721	0.02948	0.0189		654	1.0511	0.3051	0.04203	0.04826	0.05088						554	0.08436	654	0.00483	654	0.01995	654	0.01241	654	0.14075
			27.8	0.97742	27.8	1.98494	45.9377	2.27276	27.8	3.984					545	0.00543	0.02735	0.03507	0.02777	0.01724		655	1.02303	0.2997	0.0419	0.05794	0.05039						555	0.08234	655	0.00579	655	0.0198	655	0.01205	655	0.134
			27.84	0.97173	27.84	1.9779	46.088	2.28336	27.84	3.9751					546	0.00463	0.02603	0.0335	0.02596	0.0158		656	0.99828	0.2928	0.04151	0.05665	0.04715						556	0.08006	656	0.00566	656	0.01912	656	0.01174	656	0.12814
			27.88	0.96603	27.88	1.97238	46.2383	2.28949	27.88	3.96447					547	0.00451	0.02456	0.03151	0.02469	0.01475		657	0.97069	0.28598	0.0404	0.05549	0.04116						557	0.08018	657	0.00555	657	0.01903	657	0.01301	657	0.12184
			27.92	0.9595	27.92	1.96366	46.3887	2.29309	27.92	3.9505					548	0.00382	0.02397	0.03008	0.02362	0.01486		658	0.94841	0.28003	0.03935	0.05097	0.04076						558	0.0769	658	0.0051	658	0.01847	658	0.0114	658	0.11579
			27.96	0.95198	27.96	1.95416	46.5392	2.29163	27.96	3.93362					549	0.00312	0.02294	0.02908	0.02224	0.01338		659	0.92782	0.27445	0.03987	0.04684	0.0444						559	0.07478	659	0.00468	659	0.01875	659	0.0119	659	0.10953
			28	0.94415	28	1.94381	46.6897	2.2823	28	3.91675					550	0.00289	0.02206	0.02837	0.02171	0.01259		660	0.90471	0.26797	0.03562	0.05226	0.04469						560	0.07294	660	0.00523	660	0.01854	660	0.012	660	0.10466
			28.04	0.93545	28.04	1.93485	46.8402	2.26978	28.04	3.89653					551	0.00231	0.02103	0.02666	0.02043	0.01124		661	0.88395	0.26225	0.03143	0.04542	0.04047						561	0.07222	661	0.00454	661	0.01834	661	0.01145	661	0.09963
			28.08	0.92595	28.08	1.92427	46.9908	2.25369	28.08	3.87503					552	0.00208	0.02059	0.02609	0.01958	0.01115		662	0.86418	0.25515	0.03018	0.04645	0.04292						562	0.07008	662	0.00465	662	0.01813	662	0.0113	662	0.09561
			28.12	0.91676	28.12	1.91346	47.1414	2.23594	28.12	3.85248					553	0.00151	0.01986	0.02495	0.01862	0.00994		663	0.84344	0.2494	0.03346	0.04658	0.04057						563	0.06948	663	0.00466	663	0.01762	663	0.01063	663	0.09227
			28.1599	0.90685	28.1599	1.90199	47.2921	2.21724	28.1599	3.8301					554	0.00139	0.01956	0.02452	0.01852	0.00976		664	0.82053	0.24085	0.03188	0.04271	0.03644						564	0.06612	664	0.00427	664	0.01766	664	0.01063	664	0.08854
			28.2	0.89606	28.2	1.8892	47.4428	2.19982	28.2	3.80797					555	0.00105	0.01897	0.02367	0.01788	0.00981		665	0.79848	0.23513	0.02724	0.04091	0.03644						565	0.06434	665	0.00409	665	0.01763	665	0.01078	665	0.08526
			28.24	0.88521	28.24	1.877	47.5936	2.18376	28.24	3.7825					556	0.000348485	0.01868	0.02324	0.01735	0.00891		666	0.77582	0.22948	0.02429	0.04658	0.03379						566	0.06274	666	0.00466	666	0.01694	666	0.0109	666	0.08303
			28.28	0.87327	28.28	1.86136	47.7444	2.16966	28.28	3.75619					557	0.000121212	0.01809	0.02281	0.01671	0.00878		667	0.75134	0.22302	0.03012	0.03974	0.03408						567	0.06353	667	0.00397	667	0.01649	667	0.0109	667	0.08122
			28.32	0.86169	28.32	1.84712	47.8953	2.15525	28.32	3.73027					558	0.000121212	0.01765	0.02224	0.01617	0.0087		668	0.72997	0.21732	0.02724	0.03923	0.03467						568	0.06017	668	0.00392	668	0.0177	668	0.01075	668	0.07909
			28.36	0.84897	28.36	1.8329	48.0463	2.14245	28.36	3.70381					559	-0.000348485	0.0175	0.02181	0.01607	0.00806		669	0.70906	0.21188	0.02802	0.03897	0.02927						569	0.05894	669	0.0039	669	0.01651	669	0.01056	669	0.07667
			28.4	0.83678	28.4	1.8173	48.1972	2.13131	28.4	3.67937					560	-0.000462121	0.01706	0.0211	0.01575	0.00882		670	0.68731	0.2052	0.02396	0.03962	0.02623						570	0.05786	670	0.00396	670	0.01652	670	0.00938	670	0.07502
			28.44	0.8238	28.44	1.80239	48.3483	2.12347	28.44	3.65199					561	-0.000462121	0.01677	0.02053	0.01543	0.00781		671	0.66577	0.19973	0.02737	0.03884	0.03153						571	0.0547	671	0.00388	671	0.01575	671	0.00965	671	0.07345
			28.48	0.81166	28.48	1.78658	48.4993	2.11633	28.48	3.62554					562	-0.000462121	0.01677	0.02053	0.01511	0.00768		672	0.64344	0.1935	0.02311	0.03703	0.02858						572	0.05518	672	0.0037	672	0.01541	672	0.00943	672	0.07176
			28.52	0.79833	28.52	1.77005	48.6505	2.11015	28.52	3.60117					563	-0.000348485	0.01633	0.01982	0.01458	0.00782		673	0.62212	0.18648	0.02291	0.03678	0.02888						573	0.0539	673	0.00368	673	0.01502	673	0.00972	673	0.06979
			28.56	0.78406	28.56	1.75305	48.8016	2.10442	28.56	3.57777					564	-0.000462121	0.01603	0.01953	0.01426	0.00646		674	0.59588	0.18097	0.02095	0.0249	0.02426						574	0.05309	674	0.00249	674	0.01447	674	0.01015	674	0.06745
			28.6	0.76904	28.6	1.73676	48.9529	2.10005	28.6	3.55549					565	3.0303e-11	0.01588	0.01896	0.01426	0.00715		675	0.57188	0.17625	0.01833	0.02916	0.02426						575	0.05196	675	0.00292	675	0.01458	675	0.00938	675	0.06583
			28.64	0.75555	28.64	1.71934	49.1041	2.09399	28.64	3.53178					566	0.00069697	0.01559	0.01896	0.01405	0.00754		676	0.5496	0.1696	0.01814	0.02826	0.02652						576	0.0503	676	0.00283	676	0.01508	676	0.00902	676	0.06294
			28.68	0.74297	28.68	1.70191	49.2555	2.08825	28.68	3.50976					567	0.00116	0.01559	0.01882	0.01373	0.00699		677	0.5301	0.16442	0.01604	0.02632	0.02583						577	0.04858	677	0.00263	677	0.01446	677	0.00859	677	0.05943
			28.72	0.72903	28.72	1.68486	49.4069	2.08249	28.72	3.49065					568	0.00139	0.01515	0.01839	0.01341	0.00628		678	0.51339	0.1603	0.01702	0.02761	0.02004						578	0.04872	678	0.00276	678	0.01352	678	0.00926	678	0.05624
			28.76	0.71521	28.76	1.6686	49.5583	2.07703	28.76	3.47095					569	0.00139	0.01515	0.01796	0.0133	0.00645		679	0.49713	0.15598	0.01447	0.02258	0.02387						579	0.0474	679	0.00226	679	0.01395	679	0.00835	679	0.05427
			28.8	0.7012	28.8	1.65079	49.7098	2.07352	28.8	3.45267					570	0.00162	0.01515	0.01782	0.01309	0.00667		680	0.47915	0.15125	0.01722	0.02439	0.01984						580	0.0456	680	0.00244	680	0.01377	680	0.0085	680	0.05284
			28.8399	0.68764	28.8399	1.63465	49.8613	2.07175	28.8399	3.4356					571	0.00139	0.015	0.01768	0.01298	0.00667		681	0.46365	0.14738	0.01362	0.01974	0.02131						581	0.04414	681	0.00197	681	0.01289	681	0.00787	681	0.05115
			28.88	0.67378	28.88	1.61747	50.0129	2.06939	28.88	3.41979					572	0.00162	0.015	0.01725	0.01277	0.00647		682	0.4466	0.14197	0.0127	0.01832	0.01935						582	0.04315	682	0.00183	682	0.0127	682	0.00862	682	0.05008
			28.92	0.65951	28.92	1.601	50.1646	2.06788	28.92	3.40416					573	0.00139	0.01471	0.01682	0.01245	0.00586		683	0.43216	0.13765	0.01139	0.01729	0.0167						583	0.04236	683	0.00173	683	0.01289	683	0.00744	683	0.04977
			28.96	0.64532	28.96	1.58381	50.3163	2.0668	28.96	3.38891					574	0.00116	0.01485	0.01639	0.01245	0.00601		684	0.41747	0.1334	0.011	0.02297	0.02082						584	0.04073	684	0.0023	684	0.01268	684	0.0078	684	0.04933
			29	0.62971	29	1.56619	50.468	2.06835	29	3.37514					575	0.00127	0.01441	0.01597	0.01181	0.00615		685	0.40516	0.12922	0.0125	0.01832	0.01689						585	0.04056	685	0.00183	685	0.01241	685	0.00816	685	0.04908
			29.04	0.61531	29.04	1.54967	50.6198	2.06882	29.04	3.3614					576	0.00127	0.01427	0.01582	0.01202	0.00558		686	0.38829	0.12405	0.00995	0.01613	0.01562						586	0.03953	686	0.00161	686	0.01197	686	0.00792	686	0.04817
			29.08	0.60069	29.08	1.53473	50.7717	2.07119	29.08	3.34957					577	0.00162	0.01398	0.01568	0.01149	0.00548		687	0.37259	0.11912	0.01048	0.01548	0.0167						587	0.03799	687	0.00155	687	0.01102	687	0.00845	687	0.04749
			29.12	0.58674	29.12	1.52091	50.9236	2.07566	29.12	3.33848					578	0.00151	0.01412	0.01554	0.01128	0.0055		688	0.36295	0.114	0.0129	0.01819	0.01856						588	0.03674	688	0.00182	688	0.01103	688	0.00794	688	0.04621
			29.16	0.57361	29.16	1.50518	51.0756	2.0794	29.16	3.32789					579	0.00173	0.01412	0.0154	0.01149	0.0058		689	0.35059	0.1099	0.01002	0.01729	0.01051						589	0.03574	689	0.00173	689	0.01111	689	0.00746	689	0.04557
			29.2	0.56141	29.2	1.48922	51.2276	2.08724	29.2	3.31835					580	0.00185	0.01412	0.01511	0.01117	0.00566		690	0.33731	0.105	0.00694	0.01497	0.01522						590	0.03475	690	0.0015	690	0.01142	690	0.0072	690	0.04558
			29.24	0.54817	29.24	1.47458	51.3797	2.09821	29.24	3.30856					581	0.00197	0.01441	0.01482	0.01128	0.00464		691	0.32416	0.10105	0.00635	0.01548	0.0112						591	0.03295	691	0.00155	691	0.01128	691	0.00718	691	0.0447
			29.28	0.5352	29.28	1.45859	51.5318	2.11009	29.28	3.29787					582	0.0022	0.01441	0.01497	0.01096	0.0049		692	0.31114	0.09722	0.00615	0.01923	0.01395						592	0.03362	692	0.00192	692	0.01128	692	0.00667	692	0.04301
			29.32	0.52363	29.32	1.44331	51.684	2.12417	29.32	3.28957					583	0.00197	0.01441	0.0144	0.01085	0.0042		693	0.29824	0.09355	0.0057	0.01032	0.01464						593	0.03286	693	0.00103	693	0.0103	693	0.00646	693	0.04209
			29.36	0.50957	29.36	1.43042	51.8363	2.13869	29.36	3.28107					584	0.00197	0.01412	0.01397	0.01064	0.00419		694	0.28547	0.09	0.00471	0.01316	0.01287						594	0.03168	694	0.00132	694	0.01041	694	0.00612	694	0.04108
			29.4	0.49696	29.4	1.4188	51.9886	2.1564	29.4	3.27311					585	0.00162	0.01398	0.01369	0.01	0.00444		695	0.27283	0.0866	0.00465	0.01123	0.0108						595	0.03101	695	0.00112	695	0.00946	695	0.00641	695	0.04051
			29.44	0.48381	29.44	1.40444	52.1409	2.17392	29.44	3.2672					586	0.00139	0.01412	0.01383	0.01022	0.00423		696	0.26028	0.08335	0.0036	0.0089	0.00727						596	0.03029	696	0.00089038	696	0.01029	696	0.00658	696	0.03915
			29.48	0.47104	29.48	1.39077	52.2933	2.19041	29.48	3.26057					587	0.00151	0.01412	0.0134	0.01	0.00389		697	0.24787	0.08022	0.00537	0.01071	0.0113						597	0.02887	697	0.00107	697	0.00978	697	0.00566	697	0.03844
			29.52	0.45886	29.52	1.37999	52.4458	2.20659	29.52	3.25418					588	0.00127	0.01382	0.01326	0.0099	0.00416		698	0.23558	0.07723	0.0036	0.01213	0.01895						598	0.02868	698	0.00121	698	0.00967	698	0.00643	698	0.03792
			29.56	0.44706	29.56	1.36815	52.5983	2.21834	29.56	3.24796					589	0.00127	0.01412	0.01298	0.00968	0.0043		699	0.22342	0.07437	0.0021	0.01071	0.01942						599	0.02719	699	0.00107	699	0.00892	699	0.00562	699	0.03767
			29.6	0.43719	29.6	1.35753	52.7509	2.22888	29.6	3.24232					590	0.00069697	0.01398	0.01284	0.00968	0.00383		700	0.21135	0.07165	0.00151	0.00348	0.01257						600	0.02686	700	0.00034841	700	0.0088	700	0.00578	700	0.03707
			29.64	0.42583	29.64	1.34919	52.9035	2.2358	29.64	3.23573					591	0.00069697	0.01382	0.01227	0.00958	0.00386		701	--	--	--	--	--						601	0.02606			701	0.00908	701	0.00511	701	0.03662
			29.6799	0.41406	29.6799	1.34078	53.0563	2.23525	29.6799	3.23102					592	0.000348485	0.01412	0.01255	0.00968	0.00393		702	--	--	--	--	--						602	0.02606			702	0.00884	702	0.00547	702	0.03605
			29.72	0.40288	29.72	1.33323	53.209	2.23181	29.72	3.22668					593	0.000234849	0.01412	0.01241	0.00968	0.00381		703	--	--	--	--	--						603	0.02462			703	0.00819	703	0.00538	703	0.03578
			29.76	0.39211	29.76	1.32526	53.3618	2.22374	29.76	3.22134					594	-0.000348485	0.01353	0.01198	0.00904	0.00366		704	--	--	--	--	--						604	0.02453			704	0.00808	704	0.00518	704	0.03479
			29.8	0.38182	29.8	1.31597	53.5147	2.21211	29.8	3.21652					595	-0.000348485	0.01368	0.01184	0.00926	0.0029		705	--	--	--	--	--						605	0.02335			705	0.00834	705	0.0047	705	0.03428
			29.84	0.37174	29.84	1.30656	53.6676	2.20011	29.84	3.21269					596	-0.000227273	0.01398	0.0117	0.00904	0.0028		706	--	--	--	--	--						606	0.02345			706	0.00748	706	0.00449	706	0.03325
			29.88	0.36243	29.88	1.29928	53.8206	2.18632	29.88	3.20899					597	-0.000462121	0.01412	0.01156	0.00926	0.00314		707	--	--	--	--	--						607	0.02215			707	0.00739	707	0.0047	707	0.0327
			29.92	0.35369	29.92	1.29278	53.9737	2.17301	29.92	3.20471					598	-0.000689394	0.01368	0.01127	0.00894	0.00315		708	--	--	--	--	--						608	0.02112			708	0.00768	708	0.00494	708	0.03218
			29.96	0.34438	29.96	1.2862	54.1268	2.16065	29.96	3.19931					599	-0.00139	0.01368	0.01113	0.00904	0.00286		709	--	--	--	--	--						609	0.02083			709	0.0064	709	0.00482	709	0.03141
			30	0.33444	30	1.28053	54.28	2.14897	30	3.19593					600	-0.00185	0.01368	0.01098	0.00894	0.0024		710	--	--	--	--	--						610	0.02069			710	0.00651	710	0.00418	710	0.03039
			30.04	0.32613	30.04	1.2762	54.4332	2.13792	30.04	3.19192					601	-0.00196	0.01398	0.01098	0.00873	0.0022		711	--	--	--	--	--						611	0.01958			711	0.00725	711	0.0042	711	0.0285
			30.08	0.31851	30.08	1.27122	54.5865	2.12714	30.08	3.18873					602	-0.00173	0.01382	0.0107	0.00862	0.00238		712	--	--	--	--	--						612	0.01994			712	0.00664	712	0.00439	712	0.0277
			30.12	0.31051	30.12	1.26646	54.7398	2.12238	30.12	3.18703					603	-0.00185	0.01412	0.01084	0.00894	0.00222		713	--	--	--	--	--						613	0.01879			713	0.00679	713	0.00389	713	0.02751
			30.1599	0.30292	30.1599	1.26134	54.8933	2.11675	30.1599	3.18399					604	-0.00196	0.01382	0.0107	0.00873	0.00187		714	--	--	--	--	--						614	0.01798			714	0.00653	714	0.00446	714	0.02698
			30.2	0.29579	30.2	1.25869	55.0467	2.11311	30.2	3.18019					605	-0.00196	0.01368	0.01056	0.00862	0.00165		715	--	--	--	--	--						615	0.01728			715	0.00612	715	0.00377	715	0.0269
			30.24	0.28888	30.24	1.25559	55.2003	2.11288	30.24	3.17666					606	-0.00185	0.01368	0.01027	0.00862	0.00192		716	--	--	--	--	--						616	0.0174			716	0.00599	716	0.00418	716	0.02606
			30.28	0.28081	30.28	1.25067	55.3539	2.11107	30.28	3.17428					607	-0.00161	0.01368	0.01013	0.00841	0.002		717	--	--	--	--	--						617	0.01649			717	0.00614	717	0.00382	717	0.02664
			30.32	0.27314	30.32	1.24874	55.5075	2.11186	30.32	3.17038					608	-0.00196	0.01398	0.00999	0.00862	0.00144		718	--	--	--	--	--						618	0.01668			718	0.00612	718	0.00353	718	0.02638
			30.36	0.26622	30.36	1.24517	55.6613	2.11234	30.36	3.1674					609	-0.00208	0.01382	0.00984	0.00841	0.00168		719	--	--	--	--	--						619	0.01555			719	0.0052	719	0.0042	719	0.02641
			30.4	0.26032	30.4	1.2411	55.815	2.11151	30.4	3.16525					610	-0.0022	0.01353	0.00956	0.00841	0.00145		720	--	--	--	--	--						620	0.01454			720	0.00514	720	0.00358	720	0.02627
			30.44	0.25373	30.44	1.23674	55.9689	2.11018	30.44	3.1622					611	-0.0022	0.01339	0.00927	0.00819	0.00203		721	--	--	--	--	--						621	0.01469			721	0.00507	721	0.00353	721	0.02575
			30.48	0.24698	30.48	1.23314	56.1228	2.10907	30.48	3.16033					612	-0.0022	0.01382	0.00956	0.00787	0.00137		722	--	--	--	--	--						622	0.01428			722	0.00519	722	0.0035	722	0.02495
			30.52	0.24125	30.52	1.23118	56.2768	2.10964	30.52	3.15795					613	-0.00242	0.01353	0.00927	0.00787	0.00136		723	--	--	--	--	--						623	0.01404			723	0.00508	723	0.00348	723	0.02476
			30.56	0.23558	30.56	1.22801	56.4308	2.108	30.56	3.15483					614	-0.00254	0.01323	0.00885	0.00777	0.00104		724	--	--	--	--	--						624	0.01308			724	0.00466	724	0.0031	724	0.02385
			30.6	0.22964	30.6	1.22421	56.5849	2.10616	30.6	3.1517					615	-0.00254	0.01353	0.00885	0.00777	0.000889372		725	--	--	--	--	--						625	0.0131			725	0.00459	725	0.00264	725	0.02334
			30.64	0.22476	30.64	1.22121	56.7391	2.10251	30.64	3.15011					616	-0.00312	0.01339	0.00885	0.00745	0.000566358		726	--	--	--	--	--						626	0.01193			726	0.00467	726	0.00269	726	0.0226
			30.68	0.21925	30.68	1.21641	56.8933	2.09641	30.68	3.14736					617	-0.00358	0.01294	0.00842	0.00724	0.000789768		727	--	--	--	--	--						627	0.01128			727	0.00447	727	0.00257	727	0.02162
			30.72	0.21471	30.72	1.21326	57.0476	2.09326	30.72	3.14473					618	-0.00416	0.01353	0.00842	0.00756	0.0015		728	--	--	--	--	--						628	0.01123			728	0.00409	728	0.00264	728	0.02039
			30.76	0.21047	30.76	1.2115	57.202	2.08774	30.76	3.14298					619	-0.00462	0.01294	0.00813	0.00724	0.00103		729	--	--	--	--	--						629	0.01094			729	0.00432	729	0.00286	729	0.01978
			30.8	0.20566	30.8	1.20918	57.3564	2.08226	30.8	3.14112					620	-0.00486	0.01309	0.00813	0.00724	0.000952534		730	--	--	--	--	--						630	0.0108			730	0.00414	730	0.00288	730	0.01852
			30.8399	0.20114	30.8399	1.20604	57.5109	2.07682	30.8399	3.1385					621	-0.00532	0.01265	0.00785	0.0066	0.000591229		731	--	--	--	--	--						631	0.01013			731	0.00386	731	0.00254	731	0.01761
			30.88	0.1964	30.88	1.20511	57.6655	2.07106	30.88	3.1363					622	-0.00543	0.01294	0.00799	0.00692	1.56401e-07		732	--	--	--	--	--						632	0.01006			732	0.00353	732	0.00227	732	0.01724
			30.92	0.19226	30.92	1.20224	57.8201	2.06639	30.92	3.13323					623	-0.00566	0.01309	0.00799	0.00713	0.000967807		733	--	--	--	--	--						633	0.00946			733	0.00358	733	0.00269	733	0.01615
			30.96	0.189	30.96	1.19913	57.9748	2.0603	30.96	3.13118					624	-0.00578	0.01265	0.00771	0.00692	0.000838101		734	--	--	--	--	--						634	0.00929			734	0.0035	734	0.00245	734	0.01575
			31	0.18409	31	1.19674	58.1296	2.054	31	3.12943					625	-0.00578	0.01236	0.00756	0.00681	6.67186e-05		735	--	--	--	--	--						635	0.00864			735	0.00357	735	0.0024	735	0.01531
			31.04	0.17996	31.04	1.1937	58.2844	2.04848	31.04	3.12876					626	-0.00578	0.0125	0.00771	0.00681	0.00087116		736	--	--	--	--	--						636	0.00811			736	0.00291	736	0.002	736	0.01512
			31.08	0.17633	31.08	1.19203	58.4393	2.04234	31.08	3.12623					627	-0.00612	0.01236	0.00756	0.0066	0.000213986		737	--	--	--	--	--						637	0.00869			737	0.00317	737	0.00203	737	0.0153
			31.12	0.17182	31.12	1.1899	58.5943	2.0394	31.12	3.12382					628	-0.00601	0.0125	0.00756	0.00692	0.000801658		738	--	--	--	--	--						638	0.00816			738	0.00305	738	0.00229	738	0.01539
			31.16	0.16863	31.16	1.18766	58.7493	2.0351	31.16	3.12182					629	-0.00612	0.01177	0.00713	0.00649	0.000533599		739	--	--	--	--	--						639	0.00775			739	0.00307	739	0.00226	739	0.01498
			31.2	0.16511	31.2	1.18549	58.9045	2.03239	31.2	3.11963					630	-0.00647	0.01161	0.00699	0.0066	8.08789e-05		740	--	--	--	--	--						640	0.00799			740	0.00299	740	0.0022	740	0.0152
			31.24	0.16157	31.24	1.18203	59.0596	2.0313	31.24	3.11863					631	-0.00659	0.01161	0.00728	0.0066	1.7381e-07		741	--	--	--	--	--						641	0.00746			741	0.00289	741	0.00167	741	0.01482
			31.28	0.15783	31.28	1.17937	59.2149	2.03023	31.28	3.11683					632	-0.00659	0.01147	0.00699	0.00628	0.000919774		742	--	--	--	--	--						642	0.00739			742	0.00291	742	0.00177	742	0.0144
			31.32	0.15488	31.32	1.1765	59.3702	2.0299	31.32	3.11424					633	-0.0067	0.01118	0.00671	0.00617	0.00055116		743	--	--	--	--	--						643	0.00677			743	0.00289	743	0.00178	743	0.01395
			31.36	0.15214	31.36	1.17553	59.5256	2.02748	31.36	3.11164					634	-0.00682	0.01088	0.00656	0.00617	0.000337348		744	--	--	--	--	--						644	0.00631			744	0.00267	744	0.00192	744	0.01346
			31.4	0.14912	31.4	1.1732	59.681	2.02643	31.4	3.11058					635	-0.00705	0.01088	0.00656	0.00617	0.000317498		745	--	--	--	--	--						645	0.00653			745	0.00255	745	0.00194	745	0.01293
			31.44	0.1469	31.44	1.1713	59.8366	2.02538	31.44	3.10929					636	-0.00739	0.01059	0.00656	0.00585	3.91876e-05		746	--	--	--	--	--						646	0.0065			746	0.00193	746	0.00154	746	0.01236
			31.48	0.14397	31.48	1.16941	59.9922	2.02382	31.48	3.10679					637	-0.00774	0.01044	0.00671	0.00596	6.7001e-05		747	--	--	--	--	--						647	0.00636			747	0.00266	747	0.0021	747	0.01175
			31.52	0.14147	31.52	1.1676	60.1478	2.02121	31.52	3.10449					638	-0.00809	0.01015	0.00642	0.00585	-0.000679528		748	--	--	--	--	--						648	0.00634			748	0.00241	748	0.0018	748	0.01111
			31.56	0.13868	31.56	1.1652	60.3036	2.02076	31.56	3.10326					639	-0.00855	0.00971	0.00599	0.00553	-0.000540224		749	--	--	--	--	--						649	0.00566			749	0.00214	749	0.00147	749	0.01042
			31.6	0.13589	31.6	1.16211	60.4594	2.02048	31.6	3.10169					640	-0.00844	0.00971	0.00599	0.00553	-0.000288107		750	--	--	--	--	--						650	0.00562			750	0.00198	750	0.00139	750	0.0097
			31.64	0.13397	31.64	1.159	60.6153	2.02119	31.64	3.10062					641	-0.00855	0.01	0.00614	0.00564	0.000475984		751	--	--	--	--	--						651	0.00528
			31.68	0.13124	31.68	1.15615	60.7713	2.02089	31.68	3.09979					642	-0.00855	0.00985	0.00585	0.00511	-0.000310896		752	--	--	--	--	--						652	0.00506
			31.7199	0.12935	31.7199	1.15401	60.9273	2.02131	31.7199	3.09762					643	-0.00867	0.00956	0.00557	0.00479	-9.18384e-05		753	--	--	--	--	--						653	0.00506
			31.76	0.12725	31.76	1.15029	61.0834	2.02095	31.76	3.09494					644	-0.00867	0.00985	0.00571	0.005	-0.000191443		754	--	--	--	--	--						654	0.00468
			31.8	0.12475	31.8	1.14848	61.2396	2.02007	31.8	3.09283					645	-0.00878	0.01	0.00571	0.00511	0.000763209		755	--	--	--	--	--						655	0.00437
			31.84	0.12253	31.84	1.14698	61.3958	2.0205	31.84	3.09052					646	-0.00867	0.00971	0.00557	0.005	0.000921411		756	--	--	--	--	--						656	0.00439
			31.88	0.12043	31.88	1.14568	61.5522	2.02117	31.88	3.08909					647	-0.00867	0.01015	0.00571	0.00511	0.0014		757	--	--	--	--	--						657	0.00422
			31.92	0.11702	31.92	1.14304	61.7086	2.02207	31.92	3.08749					648	-0.00844	0.01	0.00542	0.005	0.00121		758	--	--	--	--	--						658	0.00413
			31.96	0.11418	31.96	1.1404	61.8651	2.0232	31.96	3.08648					649	-0.0082	0.01	0.00528	0.00468	0.000747002		759	--	--	--	--	--						659	0.00353
			32	0.11177	32	1.1399	62.0216	2.02456	32	3.08541					650	-0.00798	0.01	0.00528	0.00447	0.00112		760	--	--	--	--	--						660	0.00377
			32.04	0.10915	32.04	1.13918			32.04	3.08349					651	-0.00763	0.01015	0.00514	0.00447	0.000896558		761	--	--	--	--	--						661	0.00353
			32.08	0.10709	32.08	1.13722			32.08	3.08243					652	-0.00739	0.01015	0.005	0.00436	0.00116		762	--	--	--	--	--						662	0.00326
			32.12	0.1049	32.12	1.1372			32.12	3.08018					653	-0.00705	0.00985	0.00471	0.00415	0.00138		763	--	--	--	--	--						663	0.00302
			32.16	0.1022	32.16	1.13642			32.16	3.07825					654	-0.00682	0.01	0.00457	0.00436	0.00139		764	--	--	--	--	--						664	0.00298
			32.2	0.10038	32.2	1.13486			32.2	3.0775					655	-0.00647	0.00985	0.00443	0.00404	0.0005984		765	--	--	--	--	--						665	0.00281
			32.24	0.09904	32.24	1.13356			32.24	3.07604					656	-0.00624	0.01015	0.00457	0.00436	0.0012		766	--	--	--	--	--						666	0.00278
			32.28	0.09675	32.28	1.13063			32.28	3.07475					657	-0.00601	0.00985	0.00428	0.00372	0.000284033		767	--	--	--	--	--						667	0.00269
			32.32	0.09464	32.32	1.12994			32.32	3.07348					658	-0.00578	0.01	0.00428	0.00372	0.000513343		768	--	--	--	--	--						668	0.00271
			32.36	0.09323	32.36	1.12822			32.36	3.07202					659	-0.00566	0.00985	0.00428	0.00351	0.000164579		769	--	--	--	--	--						669	0.00247
			32.4	0.09186	32.4	1.12562			32.4	3.07066					660	-0.00566	0.01015	0.00414	0.00372	0.00101		770	--	--	--	--	--						670	0.00237
			32.44	0.09028	32.44	1.1242			32.44	3.06849					661	-0.00555	0.00985	0.004	0.00351	0.000643049		771	--	--	--	--	--						671	0.00203
			32.48	0.08918	32.48	1.12157			32.48	3.06688					662	-0.00555	0.00985	0.00371	0.00351	0.00044384		772	--	--	--	--	--						672	0.00189
			32.52	0.08745	32.52	1.11966			32.52	3.0654					663	-0.00555	0.00956	0.00371	0.00319	0.000294285		773	--	--	--	--	--						673	0.00188
			32.56	0.0856	32.56	1.11765			32.56	3.06499					664	-0.00555	0.00971	0.00357	0.00341	0.000120826		774	--	--	--	--	--						674	0.00154
			32.6	0.08391	32.6	1.11634			32.6	3.064					665	-0.00555	0.00956	0.00357	0.00309	-0.000128334		775	--	--	--	--	--						675	0.00187
			32.64	0.08226	32.64	1.11519			32.64	3.06316					666	-0.00589	0.00956	0.00343	0.00309	0.000139725		776	--	--	--	--	--						676	0.0017
			32.68	0.08041	32.68	1.11505			32.68	3.06152					667	-0.00578	0.00942	0.00314	0.00287	0.000120826		777	--	--	--	--	--						677	0.00164
			32.7199	0.07894	32.7199	1.11451			32.7199	3.06014					668	-0.00589	0.00926	0.00329	0.00277	2.91857e-05		778	--	--	--	--	--						678	0.00152
			32.76	0.07779	32.76	1.11196			32.76	3.06013					669	-0.00624	0.00926	0.00314	0.00287	0.000167539		779	--	--	--	--	--						679	0.00166
			32.8	0.07645	32.8	1.11179			32.8	3.06					670	-0.00578	0.00867	0.00271	0.00245	-0.000230226		780	--	--	--	--	--						680	0.00129
			32.84	0.07432	32.84	1.1109			32.84	3.05955					671	-0.0052	0.00853	0.00271	0.00223	0.000406446		781	--	--	--	--	--						681	0.00156
			32.88	0.07246	32.88	1.10802			32.88	3.05841					672	-0.00473	0.00867	0.00271	0.00202	0.000406446		782	--	--	--	--	--						682	0.00121
			32.92	0.07052	32.92	1.10616			32.92	3.05796					673	-0.00416	0.00867	0.00257	0.00202	0.000314806		783	--	--	--	--	--						683	0.00149
			32.96	0.06898	32.96	1.10352			32.96	3.05769					674	-0.003	0.00897	0.00229	0.00202	0.000330304		784	--	--	--	--	--						684	0.00195
			33	0.0675	33	1.10188			33	3.05773					675	-0.00208	0.00867	0.00214	0.00192	0.000200598		785	--	--	--	--	--						685	0.00564
			33.04	0.06649	33.04	1.10124			33.04	3.05751					676	-0.00104	0.00912	0.00229	0.00192	0.00115		786	--	--	--	--	--						686	0.01238
			33.08	0.06494	33.08	1.09964			33.08	3.05724					677	-0.000575758	0.00883	0.002	0.0017	0.000240952		787	--	--	--	--	--						687	0.0198
			33.12	0.06367	33.12	1.09764			33.12	3.05679					678	3.0303e-11	0.00912	0.002	0.0017	7.08944e-05		788	--	--	--	--	--						688	0.02057
			33.16	0.0621	33.16	1.09701			33.16	3.05703					679	3.0303e-11	0.01	0.00214	0.00192	0.000658566		789	--	--	--	--	--						689	0.01536
			33.2	0.06112	33.2	1.09579			33.2	3.05667					680	3.0303e-11	0.01103	0.00186	0.0017	0.000409406		790	--	--	--	--	--						690	0.00778
			33.24	0.05938	33.24	1.09548			33.24	3.05678					681	0.000121212	0.0122	0.00172	0.0016	0.000490111		791	--	--	--	--	--						691	0.00298
			33.28	0.05752	33.28	1.09518			33.28	3.05669					682	0.000121212	0.01265	0.00172	0.0016	0.000190348		792	--	--	--	--	--						692	0.001
			33.32	0.05553	33.32	1.09521			33.32	3.05619					683	-0.000113636	0.01309	0.00157	0.00128	0.000788272		793	--	--	--	--	--						693	0.000562436
			33.36	0.05339	33.36	1.09449			33.36	3.05629					684	-0.000689394	0.01323	0.00143	0.00138	0.000205846		794	--	--	--	--	--						694	0
			33.4	0.05152	33.4	1.09416			33.4	3.05671					685	-0.00104	0.01353	0.000999533	0.00106	-0.000142918		795	--	--	--	--	--						695	0.000745554
			33.44	0.04959	33.44	1.09224			33.44	3.05612					686	-0.00173	0.01353	0.00129	0.000957702	0.000203558		796	--	--	--	--	--						696	0.000281218
			33.48	0.04819	33.48	1.09283			33.48	3.0563					687	-0.00277	0.01412	0.00129	0.00128	0.000493071		797	--	--	--	--	--						697	0.000130799
			33.52	0.04724	33.52	1.09283			33.52	3.05528					688	-0.00312	0.01441	0.00115	0.00128	0.000243912		798	--	--	--	--	--						698	0.000209279
			33.56	0.04599	33.56	1.09141			33.56	3.05534					689	-0.00405	0.01441	0.00115	0.00106	0.00046297		799	--	--	--	--	--						699	6.53995e-05
			33.6	0.0446	33.6	1.09052			33.6	3.05557					690	-0.00416	0.01427	0.000999533	0.000744879	0.000116494		800	--	--	--	--	--						700	0.000222358
			33.64	0.04305	33.64	1.09047			33.64	3.0561					691	-0.00427	0.01441	0.000999533	0.00128	0.000422618		801	--	--	--	--	--
			33.68	0.04169	33.68	1.0901			33.68	3.05621					692	-0.00393	0.01427	0.000859411	0.000638468	0.000641676		802	--	--	--	--	--
			33.72	0.04134	33.72	1.08858			33.72	3.05623					693	-0.0037	0.01427	0.000579169	0.000744879	0.000552324		803	--	--	--	--	--
			33.76	0.04046	33.76	1.0872			33.76	3.05557					694	-0.00335	0.01441	0.000429706	0.000638468	7.61426e-05		804	--	--	--	--	--
			33.8	0.03894	33.8	1.0864			33.8	3.05624					695	-0.00289	0.01427	0.000429706	0.000638468	-3.01018e-05		805	--	--	--	--	--
			33.84	0.03819	33.84	1.08673			33.84	3.05549					696	-0.00231	0.01427	0.000289584	0.000425645	0.000333266		806	--	--	--	--	--
			33.88	0.03733	33.88	1.08675			33.88	3.05559					697	-0.0015	0.01427	0.000289584	0.000319234	-0.000246871		807	--	--	--	--	--
			33.92	0.0361	33.92	1.08531			33.92	3.05515					698	-0.00115	0.01412	0.000149463	0.000319234	-0.000170057		808	--	--	--	--	--
			33.96	0.03532	33.96	1.08446			33.96	3.05469					699	-0.000575758	0.01412	0.000289584	0.000319234	-0.000393467		809	--	--	--	--	--
			34	0.03455	34	1.08325			34	3.05496					700	3.0303e-11	0	9.34143e-06	0	-1.5871e-11		810	--	--	--	--	--
			34.04	0.03407	34.04	1.08387			34.04	3.0548						--	--		--	--		811	--	--	--	--	--
			34.08	0.03354	34.08	1.0834			34.08	3.05468						--	--		--	--		812	--	--	--	--	--
			34.12	0.03272	34.12	1.08146			34.12	3.05502						--	--		--	--		813	--	--	--	--	--
			34.16	0.03194	34.16	1.08072			34.16	3.05466						--	--		--	--		814	--	--	--	--	--
			34.2	0.03055	34.2	1.08054			34.2	3.05408						--	--		--	--		815	--	--	--	--	--
			34.24	0.02957	34.24	1.07997			34.24	3.05395						--	--		--	--		816	--	--	--	--	--
			34.28	0.02809	34.28	1.08011			34.28	3.05262						--	--		--	--		817	--	--	--	--	--
			34.32	0.02693	34.32	1.07975			34.32	3.05221						--	--		--	--		818	--	--	--	--	--
			34.36	0.02615	34.36	1.07935			34.36	3.05196						--	--		--	--		819	--	--	--	--	--
			34.4	0.02544	34.4	1.07827			34.4	3.05152						--	--		--	--		820	--	--	--	--	--
			34.44	0.02462	34.44	1.0783			34.44	3.05044						--	--		--	--		821	--	--	--	--	--
			34.48	0.02412	34.48	1.07921			34.48	3.0503						--	--		--	--		822	--	--	--	--	--
			34.52	0.02338	34.52	1.07782			34.52	3.04994						--	--		--	--		823	--	--	--	--	--
			34.56	0.02218	34.56	1.07711			34.56	3.04947						--	--		--	--		824	--	--	--	--	--
			34.6	0.02166	34.6	1.07679			34.6	3.04953						--	--		--	--		825	--	--	--	--	--
			34.64	0.02114	34.64	1.07735			34.64	3.0495						--	--		--	--		826	--	--	--	--	--
			34.68	0.02011	34.68	1.07717			34.68	3.04948						--	--		--	--		827	--	--	--	--	--
			34.72	0.01948	34.72	1.07686			34.72	3.04871						--	--		--	--		828	--	--	--	--	--
			34.76	0.01858	34.76	1.07702			34.76	3.04907						--	--		--	--		829	--	--	--	--	--
			34.7999	0.01726	34.7999	1.07481			34.7999	3.0494						--	--		--	--		830	--	--	--	--	--
			34.84	0.0164	34.84	1.07336			34.84	3.04939						--	--		--	--		831	--	--	--	--	--
			34.88	0.01522	34.88	1.07406			34.88	3.04926						--	--		--	--		832	--	--	--	--	--
			34.92	0.01446	34.92	1.07232			34.92	3.04849						--	--		--	--		833	--	--	--	--	--
			34.96	0.01378	34.96	1.07131			34.96	3.04817						--	--		--	--		834	--	--	--	--	--
			35	0.01316	35	1.06854			35	3.04819						--	--		--	--		835	--	--	--	--	--
			35.04	0.01276	35.04	1.06761			35.04	3.04721						--	--		--	--		836	--	--	--	--	--
			35.08	0.01262	35.08	1.06808			35.08	3.04683						--	--		--	--		837	--	--	--	--	--
			35.12	0.01226	35.12	1.06643			35.12	3.04622						--	--		--	--		838	--	--	--	--	--
			35.16	0.01189	35.16	1.06468			35.16	3.04636						--	--		--	--		839	--	--	--	--	--
			35.2	0.01112	35.2	1.06297			35.2	3.04688						--	--		--	--		840	--	--	--	--	--
			35.24	0.01059	35.24	1.0631			35.24	3.04697						--	--		--	--		841	--	--	--	--	--
			35.28	0.01007	35.28	1.06378			35.28	3.04619						--	--		--	--		842	--	--	--	--	--
			35.32	0.00982	35.32	1.06357			35.32	3.04601						--	--		--	--		843	--	--	--	--	--
			35.36	0.00931	35.36	1.06249			35.36	3.04505						--	--		--	--		844	--	--	--	--	--
			35.4	0.00905	35.4	1.06373			35.4	3.04554						--	--		--	--		845	--	--	--	--	--
			35.44	0.00815	35.44	1.06292			35.44	3.04519						--	--		--	--		846	--	--	--	--	--
			35.48	0.00756	35.48	1.06218			35.48	3.04475						--	--		--	--		847	--	--	--	--	--
			35.52	0.0072	35.52	1.0623			35.52	3.04407						--	--		--	--		848	--	--	--	--	--
			35.56	0.00676	35.56	1.06157			35.56	3.04314						--	--		--	--		849	--	--	--	--	--
			35.6	0.00649	35.6	1.06199			35.6	3.04311						--	--		--	--		850	--	--	--	--	--
			35.64	0.00608	35.64	1.0617			35.64	3.04247						--	--		--	--		851	--	--	--	--	--
			35.68	0.00552	35.68	1.06119			35.68	3.0419						--	--		--	--		852	--	--	--	--	--
			35.72	0.00541	35.72	1.06106			35.72	3.04093						--	--		--	--		853	--	--	--	--	--
			35.76	0.00489	35.76	1.06039			35.76	3.03956						--	--		--	--		854	--	--	--	--	--
			35.8	0.00427	35.8	1.06061			35.8	3.03887						--	--		--	--		855	--	--	--	--	--
			35.84	0.00402	35.84	1.06029			35.84	3.03805						--	--		--	--		856	--	--	--	--	--
			35.88	0.00392	35.88	1.05898			35.88	3.03658						--	--		--	--		857	--	--	--	--	--
			35.92	0.00314	35.92	1.05864			35.92	3.03672						--	--		--	--		858	--	--	--	--	--
			35.96	0.00279	35.96	1.05804			35.96	3.03643						--	--		--	--		859	--	--	--	--	--
			36	0.00225	36	1.05931			36	3.03642						--	--		--	--		860	--	--	--	--	--
			36.04	0.00158	36.04	1.05908			36.04	3.03477						--	--		--	--		861	--	--	--	--	--
			36.08	0.00183	36.08	1.05897			36.08	3.03427						--	--		--	--		862	--	--	--	--	--
			36.12	0.00199	36.12	1.05953			36.12	3.03394						--	--		--	--		863	--	--	--	--	--
			36.16	0.0023	36.16	1.05814			36.16	3.03355						--	--		--	--		864	--	--	--	--	--
			36.1999	0.00258	36.1999	1.05713			36.1999	3.03273						--	--		--	--		865	--	--	--	--	--
			36.24	0.00265	36.24	1.0562			36.24	3.03239						--	--		--	--		866	--	--	--	--	--
			36.28	0.00247	36.28	1.05609			36.28	3.03139						--	--		--	--		867	--	--	--	--	--
			36.32	0.00292	36.32	1.05563			36.32	3.0305						--	--		--	--		868	--	--	--	--	--
			36.36	0.00295	36.36	1.05578			36.36	3.03041						--	--		--	--		869	--	--	--	--	--
			36.4	0.0026	36.4	1.05557			36.4	3.02955						--	--		--	--		870	--	--	--	--	--
			36.44	0.00266	36.44	1.05593			36.44	3.02861						--	--		--	--		871	--	--	--	--	--
			36.48	0.00289	36.48	1.0563			36.48	3.02748						--	--		--	--		872	--	--	--	--	--
			36.5201	0.00282	36.5201	1.05702			36.5201	3.02698						--	--		--	--		873	--	--	--	--	--
			36.56	0.00317	36.56	1.05852			36.56	3.02664						--	--		--	--		874	--	--	--	--	--
			36.6	0.003	36.6	1.05753			36.6	3.02606						--	--		--	--		875	--	--	--	--	--
			36.64	0.00273	36.64	1.05779			36.64	3.02475						--	--		--	--		876	--	--	--	--	--
			36.68	0.00278	36.68	1.05621			36.68	3.02453						--	--		--	--		877	--	--	--	--	--
			36.72	0.00285	36.72	1.05568			36.72	3.02474						--	--		--	--		878	--	--	--	--	--
			36.7599	0.00229	36.7599	1.0552			36.7599	3.02492						--	--		--	--		879	--	--	--	--	--
			36.8	0.00233	36.8	1.0554			36.8	3.02485						--	--		--	--		880	--	--	--	--	--
			36.84	0.00216	36.84	1.0553			36.84	3.02459						--	--		--	--		881	--	--	--	--	--
			36.88	0.0022	36.88	1.0544			36.88	3.02386						--	--		--	--		882	--	--	--	--	--
			36.92	0.00216	36.92	1.05357			36.92	3.02351						--	--		--	--		883	--	--	--	--	--
			36.96	0.00228	36.96	1.05439			36.96	3.02232						--	--		--	--		884	--	--	--	--	--
			37	0.00162	37	1.05501			37	3.02152						--	--		--	--		885	--	--	--	--	--
			37.04	0.0011	37.04	1.0551			37.04	3.02084						--	--		--	--		886	--	--	--	--	--
			37.08	0.00135	37.08	1.05436			37.08	3.01995						--	--		--	--		887	--	--	--	--	--
			37.12	0.00112	37.12	1.05412			37.12	3.01933						--	--		--	--		888	--	--	--	--	--
			37.16	0.000832944	37.16	1.05532			37.16	3.01915						--	--		--	--		889	--	--	--	--	--
			37.2	0.000347616	37.2	1.05573			37.2	3.01902						--	--		--	--		890	--	--	--	--	--
			37.24	0	37.24	1.05506			37.24	3.01873						--	--		--	--		891	--	--	--	--	--
			37.28	4.70249e-05	37.28	1.05489			37.28	3.01824						--	--		--	--		892	--	--	--	--	--
			37.32	0.000471161	37.32	1.05433			37.32	3.01758						--	--		--	--		893	--	--	--	--	--
			37.36	0.000715502	37.36	1.05355			37.36	3.01755						--	--		--	--		894	--	--	--	--	--
			37.4	0.00137	37.4	1.05405			37.4	3.01748						--	--		--	--		895	--	--	--	--	--
			37.44	0.00116	37.44	1.05325			37.44	3.01713						--	--		--	--		896	--	--	--	--	--
			37.48	0.00143	37.48	1.05328			37.48	3.01692						--	--		--	--		897	--	--	--	--	--
			37.52	0.00184	37.52	1.05273			37.52	3.01781						--	--		--	--		898	--	--	--	--	--
			37.56	0.00145	37.56	1.05239			37.56	3.01802						--	--		--	--		899	--	--	--	--	--
			37.6	0.00221	37.6	1.05163			37.6	3.01737						--	--		--	--		900	--	--	--	--	--
			37.64	0.00244	37.64	1.05217			37.64	3.01654						--	--		--	--		901	--	--	--	--	--
			37.68	0.00259	37.68	1.05221			37.68	3.01677						--	--		--	--		902	--	--	--	--	--
			37.72	0.00282	37.72	1.05188			37.72	3.01641						--	--		--	--		903	--	--	--	--	--
			37.76	0.00246	37.76	1.05326			37.76	3.01584						--	--		--	--		904	--	--	--	--	--
			37.8	0.00246	37.8	1.05277			37.8	3.01512						--	--		--	--		905	--	--	--	--	--
			37.84	0.00291	37.84	1.05443			37.84	3.01509						--	--		--	--		906	--	--	--	--	--
			37.88	0.00301	37.88	1.05298			37.88	3.01493						--	--		--	--		907	--	--	--	--	--
			37.92	0.00307	37.92	1.05357			37.92	3.01481						--	--		--	--		908	--	--	--	--	--
			37.96	0.00378	37.96	1.05346			37.96	3.01458						--	--		--	--		909	--	--	--	--	--
			38	0.00387	38	1.05306			38	3.01347						--	--		--	--		910	--	--	--	--	--
			38.04	0.00409	38.04	1.05325			38.04	3.01323						--	--		--	--		911	--	--	--	--	--
			38.08	0.00407	38.08	1.05353			38.08	3.01294						--	--		--	--		912	--	--	--	--	--
			38.12	0.00386	38.12	1.05371			38.12	3.01286						--	--		--	--		913	--	--	--	--	--
			38.16	0.00376	38.16	1.05451			38.16	3.01298						--	--		--	--		914	--	--	--	--	--
			38.1999	0.00338	38.1999	1.05438			38.1999	3.01301						--	--		--	--		915	--	--	--	--	--
			38.24	0.00392	38.24	1.05484			38.24	3.0124						--	--		--	--		916	--	--	--	--	--
			38.28	0.00377	38.28	1.05459			38.28	3.01245						--	--		--	--		917	--	--	--	--	--
			38.32	0.00401	38.32	1.05477			38.32	3.0126						--	--		--	--		918	--	--	--	--	--
			38.36	0.00462	38.36	1.05505			38.36	3.01242						--	--		--	--		919	--	--	--	--	--
			38.4	0.00486	38.4	1.05524			38.4	3.01213						--	--		--	--		920	--	--	--	--	--
			38.44	0.00516	38.44	1.05547			38.44	3.01171						--	--		--	--		921	--	--	--	--	--
			38.48	0.00525	38.48	1.05606			38.48	3.01147						--	--		--	--		922	--	--	--	--	--
			38.5201	0.00514	38.5201	1.0558			38.5201	3.01111						--	--		--	--		923	--	--	--	--	--
			38.56	0.00559	38.56	1.05592			38.56	3.01098						--	--		--	--		924	--	--	--	--	--
			38.6	0.00596	38.6	1.05568			38.6	3.01074						--	--		--	--		925	--	--	--	--	--
			38.64	0.00586	38.64	1.05544			38.64	3.01095						--	--		--	--		926	--	--	--	--	--
			38.68	0.00543	38.68	1.05559			38.68	3.01072						--	--		--	--		927	--	--	--	--	--
			38.7199	0.00533	38.7199	1.0543			38.7199	3.01087						--	--		--	--		928	--	--	--	--	--
			38.76	0.00543	38.76	1.05457			38.76	3.01062						--	--		--	--		929	--	--	--	--	--
			38.8	0.00547	38.8	1.05446			38.8	3.01078						--	--		--	--		930	--	--	--	--	--
			38.84	0.00571	38.84	1.05526			38.84	3.01065						--	--		--	--		931	--	--	--	--	--
			38.88	0.00605	38.88	1.05538			38.88	3.01127						--	--		--	--		932	--	--	--	--	--
			38.92	0.00668	38.92	1.05487			38.92	3.01156						--	--		--	--		933	--	--	--	--	--
			38.96	0.0072	38.96	1.05495			38.96	3.01155						--	--		--	--		934	--	--	--	--	--
			39	0.00707	39	1.05549			39	3.01156						--	--		--	--		935	--	--	--	--	--
			39.04	0.00705	39.04	1.05687			39.04	3.01218						--	--		--	--		936	--	--	--	--	--
			39.08	0.00723	39.08	1.05624			39.08	3.0126						--	--		--	--		937	--	--	--	--	--
			39.12	0.00767	39.12	1.0553			39.12	3.01309						--	--		--	--		938	--	--	--	--	--
			39.16	0.00755	39.16	1.05591			39.16	3.01319						--	--		--	--		939	--	--	--	--	--
			39.2	0.00849	39.2	1.05671			39.2	3.01281						--	--		--	--		940	--	--	--	--	--
			39.24	0.0088	39.24	1.05752			39.24	3.01285						--	--		--	--		941	--	--	--	--	--
			39.28	0.00895	39.28	1.05726			39.28	3.01228						--	--		--	--		942	--	--	--	--	--
			39.32	0.0094	39.32	1.05751			39.32	3.01222						--	--		--	--		943	--	--	--	--	--
			39.36	0.00993	39.36	1.05723			39.36	3.01229						--	--		--	--		944	--	--	--	--	--
			39.4	0.01019	39.4	1.05802			39.4	3.01248						--	--		--	--		945	--	--	--	--	--
			39.44	0.01046	39.44	1.05793			39.44	3.01278						--	--		--	--		946	--	--	--	--	--
			39.48	0.01075	39.48	1.05701			39.48	3.01313						--	--		--	--		947	--	--	--	--	--
			39.52	0.01075	39.52	1.05701			39.52	3.0126						--	--		--	--		948	--	--	--	--	--
			39.56	0.01125	39.56	1.0574			39.56	3.01246						--	--		--	--		949	--	--	--	--	--
			39.6	0.01128	39.6	1.05739			39.6	3.01234						--	--		--	--		950	--	--	--	--	--
			39.64	0.01172	39.64	1.0574			39.64	3.01325						--	--		--	--		951	--	--	--	--	--
			39.68	0.0125	39.68	1.05759			39.68	3.01424						--	--		--	--		952	--	--	--	--	--
			39.72	0.01286	39.72	1.05792			39.72	3.01413						--	--		--	--		953	--	--	--	--	--
			39.76	0.0138	39.76	1.05838			39.76	3.01483						--	--		--	--		954	--	--	--	--	--
			39.8	0.01428	39.8	1.05746			39.8	3.01468						--	--		--	--		955	--	--	--	--	--
			39.84	0.01483	39.84	1.05807			39.84	3.01452						--	--		--	--		956	--	--	--	--	--
			39.88	0.0154	39.88	1.05791			39.88	3.01488						--	--		--	--		957	--	--	--	--	--
			39.92	0.01556	39.92	1.05865			39.92	3.01524						--	--		--	--		958	--	--	--	--	--
			39.96	0.01625	39.96	1.05882			39.96	3.01553						--	--		--	--		959	--	--	--	--	--
			40	0.01725	40	1.06038			40	3.01568						--	--		--	--		960	--	--	--	--	--
			40.04	0.01786	40.04	1.05982			40.04	3.01561						--	--		--	--		961	--	--	--	--	--
			40.08	0.01896	40.08	1.06069			40.08	3.01582						--	--		--	--		962	--	--	--	--	--
			40.12	0.01915	40.12	1.06064			40.12	3.01607						--	--		--	--		963	--	--	--	--	--
			40.16	0.01995	40.16	1.05969			40.16	3.01633						--	--		--	--		964	--	--	--	--	--
			40.2	0.01997	40.2	1.05981			40.2	3.01619						--	--		--	--		965	--	--	--	--	--
			40.24	0.02058	40.24	1.05994			40.24	3.01613						--	--		--	--		966	--	--	--	--	--
			40.28	0.02139	40.28	1.06115			40.28	3.01647						--	--		--	--		967	--	--	--	--	--
			40.32	0.02198	40.32	1.06154			40.32	3.01682						--	--		--	--		968	--	--	--	--	--
			40.36	0.02263	40.36	1.06236			40.36	3.01701						--	--		--	--		969	--	--	--	--	--
			40.4	0.02333	40.4	1.06281			40.4	3.01725						--	--		--	--		970	--	--	--	--	--
			40.44	0.02443	40.44	1.06518			40.44	3.01725						--	--		--	--		971	--	--	--	--	--
			40.48	0.02469	40.48	1.06559			40.48	3.01754						--	--		--	--		972	--	--	--	--	--
			40.52	0.02478	40.52	1.06498			40.52	3.01791						--	--		--	--		973	--	--	--	--	--
			40.56	0.02554	40.56	1.06507			40.56	3.01777						--	--		--	--		974	--	--	--	--	--
			40.6	0.02562	40.6	1.06445			40.6	3.01822						--	--		--	--		975	--	--	--	--	--
			40.64	0.02661	40.64	1.06622			40.64	3.01862						--	--		--	--		976	--	--	--	--	--
			40.68	0.02744	40.68	1.06642			40.68	3.01876						--	--		--	--		977	--	--	--	--	--
			40.72	0.02866	40.72	1.06718			40.72	3.01931						--	--		--	--		978	--	--	--	--	--
			40.76	0.02925	40.76	1.06735			40.76	3.01956						--	--		--	--		979	--	--	--	--	--
			40.8	0.03058	40.8	1.06859			40.8	3.01979						--	--		--	--		980	--	--	--	--	--
			40.84	0.03149	40.84	1.06883			40.84	3.01964						--	--		--	--		981	--	--	--	--	--
			40.88	0.03194	40.88	1.06984			40.88	3.01956						--	--		--	--		982	--	--	--	--	--
			40.92	0.03261	40.92	1.07093			40.92	3.02011						--	--		--	--		983	--	--	--	--	--
			40.96	0.03323	40.96	1.0727			40.96	3.02001						--	--		--	--		984	--	--	--	--	--
			41	0.03357	41	1.07272			41	3.02042						--	--		--	--		985	--	--	--	--	--
			41.04	0.03464	41.04	1.07268			41.04	3.0205						--	--		--	--		986	--	--	--	--	--
			41.08	0.03554	41.08	1.07261			41.08	3.02085						--	--		--	--		987	--	--	--	--	--
			41.12	0.03637	41.12	1.07289			41.12	3.02086						--	--		--	--		988	--	--	--	--	--
			41.16	0.03765	41.16	1.07339			41.16	3.02159						--	--		--	--		989	--	--	--	--	--
			41.2	0.03942	41.2	1.07277			41.2	3.02178						--	--		--	--		990	--	--	--	--	--
			41.2399	0.04114	41.2399	1.07263			41.2399	3.02236						--	--		--	--		991	--	--	--	--	--
			41.28	0.04227	41.28	1.07449			41.28	3.02243						--	--		--	--		992	--	--	--	--	--
			41.32	0.04339	41.32	1.07487			41.32	3.02224						--	--		--	--		993	--	--	--	--	--
			41.36	0.04432	41.36	1.07497			41.36	3.0231						--	--		--	--		994	--	--	--	--	--
			41.4	0.04514	41.4	1.0758			41.4	3.02349						--	--		--	--		995	--	--	--	--	--
			41.44	0.04599	41.44	1.07628			41.44	3.02365						--	--		--	--		996	--	--	--	--	--
			41.48	0.04765	41.48	1.0778			41.48	3.02444						--	--		--	--		997	--	--	--	--	--
			41.52	0.04919	41.52	1.07921			41.52	3.0251						--	--		--	--		998	--	--	--	--	--
			41.5601	0.05036	41.5601	1.08082			41.5601	3.02591						--	--		--	--		999	--	--	--	--	--
			41.6	0.05172	41.6	1.08126			41.6	3.02638						--	--		--	--		1000	--	--	--	--	--
			41.6399	0.05227	41.6399	1.0837			41.6399	3.02751						--	--		--	--		1001	--	--	--	--	--
			41.68	0.05321	41.68	1.08594			41.68	3.02787						--	--		--	--		1002	--	--	--	--	--
			41.72	0.05451	41.72	1.08645			41.72	3.0288						--	--		--	--		1003	--	--	--	--	--
			41.76	0.05611	41.76	1.08788			41.76	3.02967						--	--		--	--		1004	--	--	--	--	--
			41.8	0.05751	41.8	1.08807			41.8	3.0312						--	--		--	--		1005	--	--	--	--	--
			41.84	0.05974	41.84	1.08998			41.84	3.03228						--	--		--	--		1006	--	--	--	--	--
			41.88	0.06144	41.88	1.09115			41.88	3.03304						--	--		--	--		1007	--	--	--	--	--
			41.92	0.0634	41.92	1.09363			41.92	3.03364						--	--		--	--		1008	--	--	--	--	--
			41.96	0.06543	41.96	1.09512			41.96	3.03448						--	--		--	--		1009	--	--	--	--	--
			42	0.06774	42	1.0972			42	3.03523						--	--		--	--		1010	--	--	--	--	--
			42.04	0.06939	42.04	1.10028			42.04	3.03663						--	--		--	--		1011	--	--	--	--	--
			42.08	0.07148	42.08	1.10263			42.08	3.03813						--	--		--	--		1012	--	--	--	--	--
			42.12	0.07433	42.12	1.10586			42.12	3.0393						--	--		--	--		1013	--	--	--	--	--
			42.16	0.07669	42.16	1.10763			42.16	3.04016						--	--		--	--		1014	--	--	--	--	--
			42.2	0.07913	42.2	1.10947			42.2	3.04102						--	--		--	--		1015	--	--	--	--	--
			42.24	0.08134	42.24	1.11091			42.24	3.04185						--	--		--	--		1016	--	--	--	--	--
			42.28	0.08291	42.28	1.11433			42.28	3.04295						--	--		--	--		1017	--	--	--	--	--
			42.32	0.08558	42.32	1.11674			42.32	3.0439						--	--		--	--		1018	--	--	--	--	--
			42.36	0.08837	42.36	1.11853			42.36	3.04519						--	--		--	--		1019	--	--	--	--	--
			42.4	0.09129	42.4	1.1211			42.4	3.0452						--	--		--	--		1020	--	--	--	--	--
			42.44	0.09357	42.44	1.12236			42.44	3.04663						--	--		--	--		1021	--	--	--	--	--
			42.48	0.0964	42.48	1.12551			42.48	3.04795						--	--		--	--		1022	--	--	--	--	--
			42.52	0.09883	42.52	1.12668			42.52	3.0487						--	--		--	--		1023	--	--	--	--	--
			42.56	0.10117	42.56	1.12989			42.56	3.04963						--	--		--	--		1024	--	--	--	--	--
			42.6	0.1037	42.6	1.1338			42.6	3.05139						--	--		--	--		1025	--	--	--	--	--
			42.64	0.10603	42.64	1.13634			42.64	3.05209						--	--		--	--		1026	--	--	--	--	--
			42.68	0.10904	42.68	1.13801			42.68	3.05282						--	--		--	--		1027	--	--	--	--	--
			42.72	0.1124	42.72	1.14099			42.72	3.05378						--	--		--	--		1028	--	--	--	--	--
			42.76	0.11559	42.76	1.14521			42.76	3.05524						--	--		--	--		1029	--	--	--	--	--
			42.8	0.11836	42.8	1.14783			42.8	3.05687						--	--		--	--		1030	--	--	--	--	--
			42.84	0.12186	42.84	1.15023			42.84	3.05909						--	--		--	--		1031	--	--	--	--	--
			42.88	0.12536	42.88	1.15392			42.88	3.06088						--	--		--	--		1032	--	--	--	--	--
			42.92	0.12901	42.92	1.15786			42.92	3.06337						--	--		--	--		1033	--	--	--	--	--
			42.96	0.13238	42.96	1.16019			42.96	3.06534						--	--		--	--		1034	--	--	--	--	--
			43	0.13559	43	1.16275			43	3.06752						--	--		--	--		1035	--	--	--	--	--
			43.04	0.13966	43.04	1.16487			43.04	3.06965						--	--		--	--		1036	--	--	--	--	--
			43.08	0.14371	43.08	1.16806			43.08	3.07234						--	--		--	--		1037	--	--	--	--	--
			43.12	0.14755	43.12	1.1727			43.12	3.07422						--	--		--	--		1038	--	--	--	--	--
			43.16	0.15128	43.16	1.17733			43.16	3.07676						--	--		--	--		1039	--	--	--	--	--
			43.2	0.15468	43.2	1.18035			43.2	3.07968						--	--		--	--		1040	--	--	--	--	--
			43.24	0.1582	43.24	1.18412			43.24	3.08225						--	--		--	--		1041	--	--	--	--	--
			43.28	0.16221	43.28	1.18767			43.28	3.08519						--	--		--	--		1042	--	--	--	--	--
			43.32	0.16647	43.32	1.19086			43.32	3.08887						--	--		--	--		1043	--	--	--	--	--
			43.36	0.17128	43.36	1.19484			43.36	3.0928						--	--		--	--		1044	--	--	--	--	--
			43.4	0.17528	43.4	1.20047			43.4	3.09596						--	--		--	--		1045	--	--	--	--	--
			43.44	0.17957	43.44	1.20265			43.44	3.09839						--	--		--	--		1046	--	--	--	--	--
			43.48	0.18396	43.48	1.20643			43.48	3.10124						--	--		--	--		1047	--	--	--	--	--
			43.52	0.18913	43.52	1.21046			43.52	3.10559						--	--		--	--		1048	--	--	--	--	--
			43.56	0.194	43.56	1.21509			43.56	3.10987						--	--		--	--		1049	--	--	--	--	--
			43.6	0.19931	43.6	1.21779			43.6	3.11492						--	--		--	--		1050	--	--	--	--	--
			43.64	0.20452	43.64	1.22065			43.64	3.11783						--	--		--	--		1051	--	--	--	--	--
			43.68	0.20933	43.68	1.22476			43.68	3.12104						--	--		--	--		1052	--	--	--	--	--
			43.72	0.21363	43.72	1.22893			43.72	3.12499						--	--		--	--		1053	--	--	--	--	--
			43.76	0.21823	43.76	1.23297			43.76	3.12891						--	--		--	--		1054	--	--	--	--	--
			43.8	0.22297	43.8	1.23603			43.8	3.13324						--	--		--	--		1055	--	--	--	--	--
			43.84	0.22754	43.84	1.23981			43.84	3.13797						--	--		--	--		1056	--	--	--	--	--
			43.88	0.23234	43.88	1.2436			43.88	3.14343						--	--		--	--		1057	--	--	--	--	--
			43.92	0.23696	43.92	1.24551			43.92	3.14827						--	--		--	--		1058	--	--	--	--	--
			43.96	0.24205	43.96	1.24769			43.96	3.15314						--	--		--	--		1059	--	--	--	--	--
			44	0.24651	44	1.25188			44	3.15794						--	--		--	--		1060	--	--	--	--	--
			44.04	0.25196	44.04	1.25356			44.04	3.16313						--	--		--	--		1061	--	--	--	--	--
			44.08	0.25716	44.08	1.25668			44.08	3.16759						--	--		--	--		1062	--	--	--	--	--
			44.12	0.26243	44.12	1.25958			44.12	3.1723						--	--		--	--		1063	--	--	--	--	--
			44.16	0.26763	44.16	1.26242			44.16	3.17709						--	--		--	--		1064	--	--	--	--	--
			44.1999	0.27244	44.1999	1.26633			44.1999	3.18204						--	--		--	--		1065	--	--	--	--	--
			44.24	0.27771	44.24	1.2704			44.24	3.18613						--	--		--	--		1066	--	--	--	--	--
			44.28	0.28319	44.28	1.27375			44.28	3.19131						--	--		--	--		1067	--	--	--	--	--
			44.32	0.28794	44.32	1.27732			44.32	3.19693						--	--		--	--		1068	--	--	--	--	--
			44.36	0.29262	44.36	1.27984			44.36	3.20125						--	--		--	--		1069	--	--	--	--	--
			44.4	0.29725	44.4	1.28435			44.4	3.20574						--	--		--	--		1070	--	--	--	--	--
			44.44	0.30194	44.44	1.28846			44.44	3.20933						--	--		--	--		1071	--	--	--	--	--
			44.4801	0.30614	44.4801	1.2899			44.4801	3.21167						--	--		--	--		1072	--	--	--	--	--
			44.52	0.31013	44.52	1.29287			44.52	3.21433						--	--		--	--		1073	--	--	--	--	--
			44.56	0.3145	44.56	1.2964			44.56	3.21647						--	--		--	--		1074	--	--	--	--	--
			44.6	0.31822	44.6	1.29924			44.6	3.21858						--	--		--	--		1075	--	--	--	--	--
			44.64	0.32293	44.64	1.30285			44.64	3.21997						--	--		--	--		1076	--	--	--	--	--
			44.68	0.32675	44.68	1.30598			44.68	3.22083						--	--		--	--		1077	--	--	--	--	--
			44.72	0.33037	44.72	1.30827			44.72	3.22209						--	--		--	--		1078	--	--	--	--	--
			44.7599	0.33365	44.7599	1.31271			44.7599	3.22291						--	--		--	--		1079	--	--	--	--	--
			44.8	0.33811	44.8	1.31642			44.8	3.22263						--	--		--	--		1080	--	--	--	--	--
			44.84	0.34154	44.84	1.31961			44.84	3.22187						--	--		--	--		1081	--	--	--	--	--
			44.88	0.345	44.88	1.32372			44.88	3.22125						--	--		--	--		1082	--	--	--	--	--
			44.92	0.34882	44.92	1.32652			44.92	3.21951						--	--		--	--		1083	--	--	--	--	--
			44.96	0.35273	44.96	1.32987			44.96	3.21829						--	--		--	--		1084	--	--	--	--	--
			45	0.35572	45	1.33287			45	3.21687						--	--		--	--		1085	--	--	--	--	--
			45.04	0.35893	45.04	1.33631			45.04	3.21518						--	--		--	--		1086	--	--	--	--	--
			45.08	0.36177	45.08	1.34047			45.08	3.21342						--	--		--	--		1087	--	--	--	--	--
			45.12	0.36536	45.12	1.3437			45.12	3.21201						--	--		--	--		1088	--	--	--	--	--
			45.16	0.3678	45.16	1.34848			45.16	3.20858						--	--		--	--		1089	--	--	--	--	--
			45.2	0.37058	45.2	1.35079			45.2	3.20589						--	--		--	--		1090	--	--	--	--	--
			45.24	0.3723	45.24	1.35535			45.24	3.20284						--	--		--	--		1091	--	--	--	--	--
			45.28	0.3743	45.28	1.35917			45.28	3.20144						--	--		--	--		1092	--	--	--	--	--
			45.32	0.37647	45.32	1.36208			45.32	3.20117						--	--		--	--		1093	--	--	--	--	--
			45.36	0.37806	45.36	1.36528			45.36	3.19854						--	--		--	--		1094	--	--	--	--	--
			45.4	0.3803	45.4	1.36966			45.4	3.19765						--	--		--	--		1095	--	--	--	--	--
			45.44	0.38201	45.44	1.37353			45.44	3.19727						--	--		--	--		1096	--	--	--	--	--
			45.48	0.38246	45.48	1.37655			45.48	3.19811						--	--		--	--		1097	--	--	--	--	--
			45.52	0.38347	45.52	1.38076			45.52	3.19801						--	--		--	--		1098	--	--	--	--	--
			45.56	0.38441	45.56	1.38429			45.56	3.1981						--	--		--	--		1099	--	--	--	--	--
			45.6	0.38521	45.6	1.38685			45.6	3.19953						--	--		--	--		1100	--	--	--	--	--
			45.64	0.38668	45.64	1.39094			45.64	3.20094						--	--		--	--		1101	--	--	--	--	--
			45.68	0.38759	45.68	1.39453			45.68	3.20432						--	--		--	--		1102	--	--	--	--	--
			45.72	0.38837	45.72	1.39773			45.72	3.20755						--	--		--	--		1103	--	--	--	--	--
			45.76	0.3885	45.76	1.40177			45.76	3.21125						--	--		--	--		1104	--	--	--	--	--
			45.8	0.38864	45.8	1.40365			45.8	3.21601						--	--		--	--		1105	--	--	--	--	--
			45.84	0.38934	45.84	1.40719			45.84	3.22272						--	--		--	--		1106	--	--	--	--	--
			45.88	0.38875	45.88	1.40938			45.88	3.229						--	--		--	--		1107	--	--	--	--	--
			45.92	0.38812	45.92	1.41038			45.92	3.23565						--	--		--	--		1108	--	--	--	--	--
			45.96	0.38753	45.96	1.41161			45.96	3.24132						--	--		--	--		1109	--	--	--	--	--
			46	0.38744	46	1.41343			46	3.24764						--	--		--	--		1110	--	--	--	--	--
			46.04	0.38641	46.04	1.41579			46.04	3.25285												1111	--	--	--	--	--
			46.08	0.38568	46.08	1.41582			46.08	3.26												1112	--	--	--	--	--
			46.12	0.38412	46.12	1.41693			46.12	3.26682												1113	--	--	--	--	--
			46.16	0.38258	46.16	1.41692			46.16	3.2738												1114	--	--	--	--	--
			46.2	0.38055	46.2	1.41697			46.2	3.27996												1115	--	--	--	--	--
			46.24	0.37841	46.24	1.41712			46.24	3.28687												1116	--	--	--	--	--
			46.28	0.37705	46.28	1.41793			46.28	3.29367												1117	--	--	--	--	--
			46.32	0.37611	46.32	1.41642			46.32	3.29975												1118	--	--	--	--	--
			46.36	0.37395	46.36	1.4161			46.36	3.30435												1119	--	--	--	--	--
			46.4	0.37087	46.4	1.41588			46.4	3.30922												1120	--	--	--	--	--
			46.44	0.36849	46.44	1.41538			46.44	3.313												1121	--	--	--	--	--
			46.48	0.36658	46.48	1.41549			46.48	3.31789												1122	--	--	--	--	--
			46.52	0.36329	46.52	1.41401			46.52	3.32236												1123	--	--	--	--	--
			46.56	0.361	46.56	1.41389			46.56	3.32695												1124	--	--	--	--	--
			46.6	0.35822	46.6	1.41245			46.6	3.33062												1125	--	--	--	--	--
			46.64	0.35532	46.64	1.41078			46.64	3.33407												1126	--	--	--	--	--
			46.68	0.35313	46.68	1.40968			46.68	3.33592												1127	--	--	--	--	--
			46.72	0.34997	46.72	1.4082			46.72	3.33744												1128	--	--	--	--	--
			46.76	0.34718	46.76	1.40559			46.76	3.33858												1129	--	--	--	--	--
			46.8	0.34385	46.8	1.4023			46.8	3.34062												1130	--	--	--	--	--
			46.84	0.34085	46.84	1.40023			46.84	3.34109												1131	--	--	--	--	--
			46.88	0.3377	46.88	1.39806			46.88	3.34005												1132	--	--	--	--	--
			46.92	0.3344	46.92	1.39506			46.92	3.33986												1133	--	--	--	--	--
			46.96	0.33039	46.96	1.39094			46.96	3.3368												1134	--	--	--	--	--
			47	0.32657	47	1.38883			47	3.33586												1135	--	--	--	--	--
			47.04	0.32359	47.04	1.38563			47.04	3.33437												1136	--	--	--	--	--
			47.08	0.31982	47.08	1.38447			47.08	3.33037												1137	--	--	--	--	--
			47.12	0.31626	47.12	1.382			47.12	3.32538												1138	--	--	--	--	--
			47.16	0.31293	47.16	1.37792			47.16	3.32089												1139	--	--	--	--	--
			47.2	0.30926	47.2	1.37461			47.2	3.31661												1140	--	--	--	--	--
			47.24	0.3057	47.24	1.37087			47.24	3.3126												1141	--	--	--	--	--
			47.28	0.30202	47.28	1.36721			47.28	3.30914												1142	--	--	--	--	--
			47.32	0.29883	47.32	1.36274			47.32	3.30467												1143	--	--	--	--	--
			47.36	0.2952	47.36	1.35886			47.36	3.30043												1144	--	--	--	--	--
			47.4	0.29053	47.4	1.35427			47.4	3.29599												1145	--	--	--	--	--
			47.44	0.28724	47.44	1.34853			47.44	3.29181												1146	--	--	--	--	--
			47.48	0.28349	47.48	1.34581			47.48	3.28592												1147	--	--	--	--	--
			47.52	0.28001	47.52	1.34177			47.52	3.28014												1148	--	--	--	--	--
			47.56	0.27619	47.56	1.33719			47.56	3.27411												1149	--	--	--	--	--
			47.6	0.27299	47.6	1.33159			47.6	3.26811												1150	--	--	--	--	--
			47.64	0.26902	47.64	1.32669			47.64	3.26229												1151	--	--	--	--	--
			47.68	0.26549	47.68	1.32218			47.68	3.25645												1152	--	--	--	--	--
			47.72	0.26212	47.72	1.31621			47.72	3.24921												1153	--	--	--	--	--
			47.76	0.25892	47.76	1.31108			47.76	3.24294												1154	--	--	--	--	--
			47.8	0.25596	47.8	1.30609			47.8	3.23593												1155	--	--	--	--	--
			47.84	0.25208	47.84	1.30072			47.84	3.23014												1156	--	--	--	--	--
			47.88	0.249	47.88	1.29548			47.88	3.2239												1157	--	--	--	--	--
			47.92	0.24578	47.92	1.28983			47.92	3.21739												1158	--	--	--	--	--
			47.96	0.2429	47.96	1.28583			47.96	3.21156												1159	--	--	--	--	--
			48	0.2395	48	1.28188			48	3.20617												1160	--	--	--	--	--
			48.04	0.23641	48.04	1.27683			48.04	3.20159													--	--	--	--	--
			48.08	0.23212	48.08	1.27384			48.08	3.19847													--	--	--	--	--
			48.12	0.22928	48.12	1.27114			48.12	3.1934													--	--	--	--	--
			48.16	0.22568	48.16	1.26742			48.16	3.1896													--	--	--	--	--
			48.2	0.22187	48.2	1.26389			48.2	3.18554													--	--	--	--	--
			48.24	0.21821	48.24	1.26011			48.24	3.18231													--	--	--	--	--
			48.28	0.2152	48.28	1.25675			48.28	3.17779													--	--	--	--	--
			48.32	0.21112	48.32	1.25405			48.32	3.17503													--	--	--	--	--
			48.36	0.20802	48.36	1.25027			48.36	3.17212													--	--	--	--	--
			48.4	0.20531	48.4	1.24753			48.4	3.16853
			48.44	0.2024	48.44	1.24316			48.44	3.16443
			48.48	0.19968	48.48	1.23948			48.48	3.16118
			48.52	0.19645	48.52	1.23774			48.52	3.15765
			48.56	0.19453	48.56	1.23539			48.56	3.15418
			48.6	0.19202	48.6	1.23364			48.6	3.1517
			48.64	0.19084	48.64	1.23319			48.64	3.14834
			48.68	0.18834	48.68	1.23117			48.68	3.14434
			48.72	0.18571	48.72	1.229			48.72	3.14255
			48.76	0.18436	48.76	1.22932			48.76	3.14101
			48.8	0.18319	48.8	1.22828			48.8	3.13952
			48.84	0.18111	48.84	1.2264			48.84	3.13788
			48.88	0.17966	48.88	1.22454			48.88	3.13634
			48.92	0.17718	48.92	1.22411			48.92	3.13464
			48.96	0.17484	48.96	1.22251			48.96	3.13387
			49	0.17206	49	1.22099			49	3.13244
			49.04	0.17057	49.04	1.22106			49.04	3.13129
			49.08	0.16946	49.08	1.22027			49.08	3.12961
			49.12	0.16834	49.12	1.21821			49.12	3.12764
			49.16	0.16665	49.16	1.21801			49.16	3.12616
			49.2	0.16574	49.2	1.21692			49.2	3.12304
			49.24	0.16412	49.24	1.21893			49.24	3.12083
			49.28	0.1634	49.28	1.21764			49.28	3.11751
			49.32	0.16205	49.32	1.21836			49.32	3.11522
			49.36	0.16094	49.36	1.2185			49.36	3.11292
			49.4	0.15977	49.4	1.21722			49.4	3.11106
			49.44	0.15897	49.44	1.21707			49.44	3.10947
			49.48	0.15776	49.48	1.2164			49.48	3.10787
			49.52	0.15822	49.52	1.21608			49.52	3.10625
			49.56	0.15768	49.56	1.21503			49.56	3.10565
			49.6	0.1576	49.6	1.21365			49.6	3.10481
			49.64	0.15671	49.64	1.21322			49.64	3.10392
			49.68	0.15617	49.68	1.21187			49.68	3.1015
			49.72	0.15573	49.72	1.2112			49.72	3.09952
			49.76	0.15553	49.76	1.21058			49.76	3.09884
			49.8	0.15539	49.8	1.20944			49.8	3.0976
			49.84	0.1552	49.84	1.20903			49.84	3.09722
			49.88	0.1545	49.88	1.20807			49.88	3.09603
			49.92	0.15426	49.92	1.20891			49.92	3.09526
			49.96	0.15496	49.96	1.20907			49.96	3.09323
			50	0.1555	50	1.2087			50	3.09196
			50.04	0.15549	50.04	1.2079			50.04	3.09103
			50.08	0.15544	50.08	1.2073			50.08	3.09026
			50.12	0.15591	50.12	1.20754			50.12	3.0895
			50.16	0.15622	50.16	1.20683			50.16	3.08972
			50.2	0.15708	50.2	1.20464			50.2	3.08878
			50.24	0.15777	50.24	1.20518			50.24	3.0883
			50.28	0.159	50.28	1.20428			50.28	3.08778
			50.32	0.16006	50.32	1.20417			50.32	3.08874
			50.36	0.16043	50.36	1.20456			50.36	3.08819
			50.4	0.16086	50.4	1.2052			50.4	3.08768
			50.44	0.16254	50.44	1.2055			50.44	3.08704
			50.48	0.16314	50.48	1.2059			50.48	3.08825
			50.52	0.16365	50.52	1.20574			50.52	3.08847
			50.56	0.16439	50.56	1.20688			50.56	3.08807
			50.6	0.1654	50.6	1.2082			50.6	3.08719
			50.64	0.16679	50.64	1.20795			50.64	3.08728
			50.68	0.16759	50.68	1.20733			50.68	3.08625
			50.72	0.16855	50.72	1.20728			50.72	3.08543
			50.76	0.16987	50.76	1.20805			50.76	3.08492
			50.8	0.1705	50.8	1.20987			50.8	3.08385
			50.84	0.17211	50.84	1.21205			50.84	3.08335
			50.88	0.17328	50.88	1.21211			50.88	3.08237
			50.92	0.17439	50.92	1.21344			50.92	3.0824
			50.96	0.17607	50.96	1.21438			50.96	3.08306
			51	0.17804	51	1.21553			51	3.08253
			51.04	0.18048	51.04	1.21751			51.04	3.08269
			51.08	0.18222	51.08	1.2206			51.08	3.08328
			51.12	0.18363	51.12	1.22257			51.12	3.08309
			51.16	0.18544	51.16	1.22455			51.16	3.08378
			51.2	0.18718	51.2	1.2268			51.2	3.08408
			51.24	0.18961	51.24	1.2293			51.24	3.08337
			51.28	0.19205	51.28	1.23291			51.28	3.08391
			51.32	0.19476	51.32	1.23659			51.32	3.08538
			51.36	0.19694	51.36	1.24043			51.36	3.08639
			51.4	0.19903	51.4	1.2438			51.4	3.08785
			51.44	0.20111	51.44	1.2466			51.44	3.08906
			51.48	0.20333	51.48	1.24949			51.48	3.09035
			51.52	0.20585	51.52	1.25159			51.52	3.09111
			51.56	0.20814	51.56	1.25399			51.56	3.09138
			51.6	0.21033	51.6	1.25759			51.6	3.09316
			51.64	0.21218	51.64	1.2609			51.64	3.0945
			51.68	0.21446	51.68	1.26311			51.68	3.09608
			51.72	0.21671	51.72	1.26702			51.72	3.09802
			51.76	0.21862	51.76	1.27138			51.76	3.09966
			51.8	0.22116	51.8	1.27527			51.8	3.10283
			51.84	0.22283	51.84	1.2789			51.84	3.10606
			51.88	0.22508	51.88	1.28374			51.88	3.10911
			51.92	0.22691	51.92	1.28766			51.92	3.11267
			51.96	0.22927	51.96	1.29221			51.96	3.11537
			52	0.23144	52	1.29625			52	3.11959
			52.04	0.23363	52.04	1.30114			52.04	3.12374
			52.08	0.23578	52.08	1.30394			52.08	3.12769
			52.12	0.23817	52.12	1.30768			52.12	3.13154
			52.16	0.23995	52.16	1.31078			52.16	3.13527
			52.2	0.2414	52.2	1.31613			52.2	3.14112
			52.24	0.24412	52.24	1.31974			52.24	3.147
			52.28	0.24627	52.28	1.3234			52.28	3.15024
			52.32	0.24801	52.32	1.32748			52.32	3.1555
			52.36	0.25039	52.36	1.33122			52.36	3.15995
			52.4	0.25245	52.4	1.33534			52.4	3.16483
			52.44	0.25438	52.44	1.33886			52.44	3.17014
			52.48	0.25633	52.48	1.34323			52.48	3.1767
			52.52	0.25775	52.52	1.34748			52.52	3.18248
			52.56	0.25926	52.56	1.3506			52.56	3.18784
			52.6	0.26111	52.6	1.35388			52.6	3.19385
			52.64	0.26314	52.64	1.35669			52.64	3.19945
			52.68	0.26416	52.68	1.35947			52.68	3.20411
			52.72	0.26497	52.72	1.36196			52.72	3.20896
			52.76	0.26719	52.76	1.3638			52.76	3.21529
			52.8	0.26804	52.8	1.36608			52.8	3.22029
			52.84	0.26882	52.84	1.36758			52.84	3.22412
			52.88	0.26996	52.88	1.36939			52.88	3.2311
			52.92	0.27079	52.92	1.37097			52.92	3.23499
			52.96	0.27154	52.96	1.37166			52.96	3.23885
			53	0.27273	53	1.3733			53	3.24261
			53.04	0.27403	53.04	1.37496			53.04	3.24564
			53.08	0.27401	53.08	1.37547			53.08	3.24761
			53.12	0.27436	53.12	1.37616			53.12	3.25041
			53.16	0.2747	53.16	1.37708			53.16	3.25327
			53.2	0.27479	53.2	1.37703			53.2	3.25554
			53.24	0.27491	53.24	1.37766			53.24	3.25636
			53.28	0.27547	53.28	1.37625			53.28	3.25787
			53.32	0.2754	53.32	1.37611			53.32	3.25832
			53.36	0.27548	53.36	1.3747			53.36	3.25873
			53.4	0.27562	53.4	1.37373			53.4	3.2597
			53.44	0.2759	53.44	1.37368			53.44	3.25851
			53.48	0.27483	53.48	1.37215			53.48	3.25724
			53.52	0.27507	53.52	1.37116			53.52	3.25566
			53.56	0.27405	53.56	1.37133			53.56	3.25419
			53.6	0.27323	53.6	1.37046			53.6	3.25213
			53.64	0.27168	53.64	1.36892			53.64	3.24808
			53.68	0.27115	53.68	1.36709			53.68	3.24467
			53.72	0.26986	53.72	1.36605			53.72	3.24115
			53.76	0.2685	53.76	1.36463			53.76	3.23676
			53.8	0.2675	53.8	1.36244			53.8	3.23285
			53.84	0.26708	53.84	1.36133			53.84	3.2278
			53.88	0.26558	53.88	1.358			53.88	3.22137
			53.92	0.26512	53.92	1.35458			53.92	3.21667
			53.96	0.26443	53.96	1.35133			53.96	3.21164
			54	0.26324	54	1.34792			54	3.20638
			54.04	0.26118	54.04	1.34437			54.04	3.20087
			54.08	0.2597	54.08	1.34107			54.08	3.19581
			54.12	0.25807	54.12	1.33773			54.12	3.18904
			54.16	0.2566	54.16	1.33434			54.16	3.18344
			54.2	0.25546	54.2	1.33145			54.2	3.17806
			54.24	0.25327	54.24	1.32936			54.24	3.17084
			54.28	0.25112	54.28	1.32642			54.28	3.16482
			54.32	0.24909	54.32	1.32381			54.32	3.16014
			54.36	0.24677	54.36	1.32135			54.36	3.15586
			54.4	0.24473	54.4	1.31859			54.4	3.15126
			54.44	0.24284	54.44	1.31562			54.44	3.14723
			54.48	0.24051	54.48	1.31214			54.48	3.14431
			54.52	0.23806	54.52	1.30744			54.52	3.1397
			54.56	0.23559	54.56	1.30527			54.56	3.13679
			54.6	0.23429	54.6	1.30169			54.6	3.13318
			54.64	0.23172	54.64	1.29838			54.64	3.13013
			54.68	0.22973	54.68	1.29516			54.68	3.1278
			54.72	0.2288	54.72	1.2922			54.72	3.12646
			54.76	0.22689	54.76	1.28985			54.76	3.12445
			54.8	0.22518	54.8	1.28761			54.8	3.12137
			54.84	0.22338	54.84	1.28473			54.84	3.11985
			54.88	0.22116	54.88	1.28173			54.88	3.11898
			54.92	0.21965	54.92	1.28051			54.92	3.11784
			54.96	0.21752	54.96	1.27749			54.96	3.11739
			55	0.21479	55	1.27643			55	3.11735
			55.04	0.21265	55.04	1.27597			55.04	3.11593
			55.08	0.20967	55.08	1.27523			55.08	3.11485
			55.12	0.20675	55.12	1.27318			55.12	3.11335
			55.16	0.20547	55.16	1.27013			55.16	3.11236
			55.2	0.20281	55.2	1.26843			55.2	3.11143
			55.24	0.20012	55.24	1.26811			55.24	3.11054
			55.28	0.1971	55.28	1.26737			55.28	3.11038
			55.32	0.19492	55.32	1.26528			55.32	3.10937
			55.36	0.19248	55.36	1.26282			55.36	3.108
			55.4	0.18895	55.4	1.26052			55.4	3.10697
			55.44	0.18655	55.44	1.25944			55.44	3.10646
			55.48	0.18464	55.48	1.25767			55.48	3.10487
			55.52	0.18159	55.52	1.25615			55.52	3.10435
			55.56	0.17998	55.56	1.25608			55.56	3.10322
			55.6	0.17717	55.6	1.25496			55.6	3.10214
			55.64	0.17493	55.64	1.25328			55.64	3.10223
			55.68	0.17284	55.68	1.25231			55.68	3.10231
			55.72	0.17058	55.72	1.25236			55.72	3.10126
			55.76	0.16798	55.76	1.25248			55.76	3.10099
			55.8	0.16572	55.8	1.25195			55.8	3.10052
			55.84	0.1632	55.84	1.25093			55.84	3.09995
			55.88	0.1607	55.88	1.25015			55.88	3.10068
			55.92	0.15834	55.92	1.24812			55.92	3.10207
			55.96	0.15609	55.96	1.24851			55.96	3.10245
			56	0.15364	56	1.24741			56	3.10331
			56.04	0.15116	56.04	1.24668			56.04	3.10386
			56.08	0.14882	56.08	1.24513			56.08	3.10434
			56.12	0.14655	56.12	1.24508			56.12	3.10567
			56.16	0.14411	56.16	1.2446			56.16	3.10546
			56.2	0.14152	56.2	1.2447			56.2	3.10581
			56.24	0.13997	56.24	1.24313			56.24	3.10753
			56.28	0.13727	56.28	1.24241			56.28	3.1095
			56.32	0.13534	56.32	1.24158			56.32	3.11079
			56.36	0.1331	56.36	1.24075			56.36	3.11191
			56.4	0.13108	56.4	1.23955			56.4	3.11317
			56.44	0.12871	56.44	1.23811			56.44	3.11512
			56.48	0.12679	56.48	1.23855			56.48	3.11599
			56.52	0.12488	56.52	1.23653			56.52	3.11796
			56.56	0.12251	56.56	1.23478			56.56	3.11978
			56.6	0.1206	56.6	1.23368			56.6	3.12169
			56.64	0.11862	56.64	1.23211			56.64	3.1221
			56.68	0.11623	56.68	1.23091			56.68	3.12415
			56.72	0.11408	56.72	1.22911			56.72	3.12543
			56.76	0.1127	56.76	1.22784			56.76	3.12676
			56.8	0.11041	56.8	1.22703			56.8	3.12842
			56.84	0.10852	56.84	1.22465			56.84	3.12887
			56.88	0.10647	56.88	1.2227			56.88	3.12868
			56.92	0.10409	56.92	1.22157			56.92	3.12822
			56.96	0.1015	56.96	1.22003			56.96	3.12723
			57	0.0994	57	1.21859			57	3.12815
			57.04	0.09723	57.04	1.21725			57.04	3.12835
			57.08	0.09514	57.08	1.2142			57.08	3.1286
			57.12	0.09371	57.12	1.21165			57.12	3.12873
			57.16	0.09136	57.16	1.20959			57.16	3.12831
			57.2	0.08944	57.2	1.20725			57.2	3.12793
			57.24	0.08775	57.24	1.2057			57.24	3.12716
			57.28	0.08552	57.28	1.20285			57.28	3.12648
			57.32	0.08306	57.32	1.20079			57.32	3.12449
			57.36	0.081	57.36	1.19878			57.36	3.12358
			57.4	0.07906	57.4	1.19637			57.4	3.12352
			57.44	0.0773	57.44	1.19344			57.44	3.12253
			57.48	0.07512	57.48	1.19178			57.48	3.12181
			57.52	0.07286	57.52	1.18939			57.52	3.12052
			57.56	0.07029	57.56	1.18779			57.56	3.11867
			57.6	0.06855	57.6	1.18381			57.6	3.11739
			57.64	0.06695	57.64	1.18108			57.64	3.11545
			57.68	0.06571	57.68	1.17843			57.68	3.11434
			57.72	0.06388	57.72	1.17647			57.72	3.11301
			57.76	0.06215	57.76	1.17398			57.76	3.11009
			57.8	0.06083	57.8	1.1711			57.8	3.10892
			57.84	0.05927	57.84	1.16807			57.84	3.10736
			57.88	0.05692	57.88	1.1646			57.88	3.10518
			57.92	0.0557	57.92	1.16275			57.92	3.10229
			57.96	0.05372	57.96	1.16088			57.96	3.10014
			58	0.05209	58	1.15858			58	3.09838
			58.04	0.05054	58.04	1.1565			58.04	3.09529
			58.08	0.04901	58.08	1.15443			58.08	3.09278
			58.12	0.0475	58.12	1.15237			58.12	3.09182
			58.16	0.04602	58.16	1.15031			58.16	3.08938
			58.2	0.04456	58.2	1.14827			58.2	3.08758
			58.24	0.04312	58.24	1.14623			58.24	3.08479
			58.28	0.0417	58.28	1.14419			58.28	3.08258
			58.32	0.0403	58.32	1.14217			58.32	3.07955
			58.36	0.03893	58.36	1.14015			58.36	3.07684
			58.4	0.03757	58.4	1.13814			58.4	3.07417
			58.44	0.03624	58.44	1.13613			58.44	3.07054
			58.48	0.03493	58.48	1.13413			58.48	3.06849
			58.52	0.03364	58.52	1.13214			58.52	3.0663
			58.56	0.03238	58.56	1.13016			58.56	3.06442
			58.6	0.03113	58.6	1.12819			58.6	3.06287
			58.64	0.02991	58.64	1.12622			58.64	3.05992
			58.68	0.02871	58.68	1.12426			58.68	3.05826
			58.72	0.02753	58.72	1.1223			58.72	3.0558
			58.76	0.02637	58.76	1.12036			58.76	3.05372
			58.8	0.02524	58.8	1.11842			58.8	3.05203
			58.84	0.02412	58.84	1.11649			58.84	3.05061
			58.88	0.02303	58.88	1.11456			58.88	3.04872
			58.92	0.02196	58.92	1.11265			58.92	3.04738
			58.96	0.02091	58.96	1.11074			58.96	3.04701
			59	0.01988	59	1.10883			59	3.04583
			59.04	0.01888	59.04	1.10694			59.04	3.04369
			59.08	0.01789	59.08	1.10505			59.08	3.04247
			59.12	0.01693	59.12	1.10317			59.12	3.04082
			59.16	0.01599	59.16	1.1013			59.16	3.03932
			59.2	0.01507	59.2	1.09943			59.2	3.03798
			59.24	0.01418	59.24	1.09757			59.24	3.03645
			59.28	0.0133	59.28	1.09572			59.28	3.03491
			59.32	0.01245	59.32	1.09388			59.32	3.03337
			59.36	0.01162	59.36	1.09204			59.36	3.03183
			59.4	0.01081	59.4	1.09021			59.4	3.03028
			59.44	0.01002	59.44	1.08839			59.44	3.02872
			59.48	0.00925	59.48	1.08657			59.48	3.02716
			59.52	0.00851	59.52	1.08476			59.52	3.0256
			59.56	0.00778	59.56	1.08296			59.56	3.02403
			59.6	0.00708	59.6	1.08117			59.6	3.02246
			59.64	0.0064	59.64	1.07938			59.64	3.02088
			59.68	0.00574	59.68	1.0776			59.68	3.0193
			59.72	0.00511	59.72	1.07583			59.72	3.01771
			59.76	0.00449	59.76	1.07407			59.76	3.01612
			59.8	0.0039	59.8	1.07231			59.8	3.01452
			59.84	0.00333	59.84	1.07056			59.84	3.01292
			59.88	0.00278	59.88	1.06882			59.88	3.01131
			59.92	0.00225	59.92	1.06708			59.92	3.0097
			59.96	0.00175	59.96	1.06535			59.96	3.00808
			60	0.00126	60	1.06363			60	3.00646

## Sheet: Fig. 3
		Fig. 3a													Fig. 3b							Fig. 3c						Fig. 3d							Fig. 3e						Fig. 3e inset
		AIGS-AGS			histogram			AIGS core			histogram				On-time fraction							trap state emission			1Se-1Sh transition			AIGS-AGS			AIGS core
		Time (s)	PL Intensity (counts/bin)		Counts	PL Intensity (counts/bin)		Time (s)	PL Intensity (counts/bin)		Counts	PL Intensity (counts/bin)			AIGS-AGS	AIGS core			Average	error bar (SD)		Wavelength (nm)	PL Intensity (a.u.)		Wavelength (nm)	PL Intensity (a.u.)		PL Peak (nm)	FWHM (nm)		PL Peak (nm)	FWHM (nm)			Time (hr)	1.6-0.6	1.6-1.2	1.6-1.6	1.6-2.9		l	T50
		0	0		1	0		0	0		1	0			79.945	0.45		AIGS-AGS	63.8975	25.4257		554.432	-0.03327		454.228	0.02301		513.121	13.113		536.678	15.843			0.1	82	93	89	89		0.6	43
		0.05	569		0	1		0.05	521		0	1			94.624	0.525		AIGS core	12.2711	11.6364		554.561	-0.02289		454.357	-0.038		512.177	13.1223		538.433	15.9687			1	85	89	85	87		1.2	72
		0.1	560		0	2		0.1	481		0	2			14.004	0.925						554.69	-0.02357		454.487	0.04378		516.728	13.3842		517.478	14.5406			10	78	78	82	80		1.6	100
		0.15	534		0	3		0.15	509		0	3			87.547	1.55						554.819	-0.00223		454.616	-0.02207		512.496	13.4933		544.868	19.0922			33	51.7	65	76.08	79.35		2.9	134
		0.2	514		0	4		0.2	503		0	4			78.045	1.901						554.948	-0.00476		454.746	0.03577		530.82	13.5283		569.833	50.4501			72	25	45	60	69
		0.25	561		0	5		0.25	574		0	5			96.674	2.001						555.077	0.01179		454.875	0.02503		532.29	13.5963		605.223	61.3873			96	0.4	0.9	47	63
		0.3	331		0	6		0.3	561		0	6			98.425	2.726						555.206	0.01792		455.005	-0.04747		512.82	14.0503		526.681	15.9556			150			20	38
		0.35	435		0	7		0.35	600		0	7			81.52	2.826						555.335	0.01451		455.134	-0.00252		497.098	14.0557		544.695	19.8444			200			2	25
		0.4	525		0	8		0.4	552		1	8			99.8	3.251						555.464	-0.0012		455.263	0.01232		520.823	14.1016		526.611	18.4883			250				1
		0.45	579		2	9		0.45	545		0	9			43.111	3.425						555.593	0.00493		455.393	-0.00217		514.772	14.1109		516.681	16.5388
		0.5	560		1	10		0.5	518		5	10			50.313	4.401						555.722	-0.02658		455.522	0.00657		513.768	14.1594		535.87	26.8178
		0.55	578		3	11		0.55	558		11	11			81.37	6.177						555.851	-0.01741		455.652	0.00193		516.675	14.1675		568.491	42.533
		0.6	562		10	12		0.6	515		24	12			91.498	6.402						555.98	-0.02111		455.781	-0.04148		524.68	14.1683		554.254	43.9632
		0.65	555		7	13		0.65	557		30	13			8.577	6.602						556.11	0.02669		455.91	-0.01413		515.208	14.2286		532.103	43.8511
		0.7	598		9	14		0.7	579		48	14			19.48	10.428						556.239	0.04277		456.04	0.02143		511.819	14.2298		579.298	50.9451
		0.75	560		16	15		0.75	562		55	15			22.631	10.703						556.368	0.02855		456.169	0.02534		510.975	14.2611		523.625	15.6517
		0.8	524		17	16		0.8	570		76	16			28.857	14.104						556.497	0.04145		456.299	-0.01353		520.17	14.3634		616.272	58.0145
		0.85	525		28	17		0.85	532		119	17			65.491	15.563						556.626	-0.03692		456.428	0.000528983		518.361	14.3687		576.544	51.3717
		0.9	618		32	18		0.9	539		128	18			94.249	18.055						556.755	-0.00178		456.557	0.04653		497.511	14.4229		617.477	61.7795
		0.95	576		30	19		0.95	386		180	19			47.687	19.005						556.884	-0.01817		456.687	0.03105		509.506	14.444		594.684	46.0467
		1	586		50	20		1	106		196	20			33.033	20.505						557.013	-0.02562		456.816	-0.0149		517.756	14.4519		581.878	49.1859
		1.05	587		39	21		1.05	120		200	21			42.511	21.58						557.142	0.05751		456.946	-0.01305		523.071	14.5852		573.247	49.8441
		1.1	567		52	22		1.1	113		217	22			78.07	22.006						557.271	-0.01483		457.075	0.01211		510.382	14.6427		518.596	15.6262
		1.15	540		42	23		1.15	130		223	23			24.056	29.007						557.4	-0.02522		457.204	-0.02101		521.518	14.644		563.187	52.7015
		1.2	613		39	24		1.2	96		221	24			80.37	35.134						557.529	0.00819		457.334	0.01086		524.499	14.6629		524.599	18.844
		1.25	562		37	25		1.25	40		202	25			44.836	35.609						557.658	0.02251		457.463	-0.03145		515.783	14.6953		582.727	45.9991
		1.3	573		40	26		1.3	50		179	26			96.649	36.459						557.787	0.05933		457.593	0.01314		523.485	14.8746		592.14	60.6852
		1.35	501		29	27		1.35	43		169	27			91.025							557.916	0.01426		457.722	0.00673		520.879	14.8849		595.094	52.6028
		1.4	589		31	28		1.4	32		128	28			48.362							558.045	-0.03946		457.851	-0.01626		516.631	14.9003		588.881	47.7069
		1.45	552		31	29		1.45	87		98	29			28.582							558.174	-0.02737		457.981	-0.0297		496.802	14.9399		590.486	49.3284
		1.5	643		23	30		1.5	41		109	30			48.737							558.303	-0.00796		458.11	-0.01642		492.174	14.9755		592.527	54.0485
		1.55	602		25	31		1.55	36		102	31			66.917							558.432	-0.04409		458.239	-0.01418		501.695	14.9828		621.231	73.1211
		1.6	586		15	32		1.6	29		69	32			79.12							558.56	-0.00865		458.369	0.00138		509.552	15.0066		587.109	54.6201
		1.65	595		17	33		1.65	154		60	33			67.275							558.689	0.02333		458.498	-0.02548		503.464	15.1751		594.538	55.0611
		1.7	606		22	34		1.7	477		49	34			80.67							558.818	0.0116		458.627	0.06626		505.083	15.2052		589.951	48.9212
		1.75	559		11	35		1.75	465		41	35			72.518							558.947	-0.01785		458.757	0.03501		510.02	15.2362		580.887	44.3833
		1.8	509		14	36		1.8	475		22	36			84.621							559.076	-0.00717		458.886	-0.05499		521.938	15.2585		584.579	49.5494
		1.85	553		5	37		1.85	437		20	37			76.794							559.205	-0.00351		459.015	-0.00614		528.677	15.3001		602.002	58.4044
		1.9	533		16	38		1.9	447		22	38			83.471							559.334	-0.02287		459.145	-0.02188		490.16	15.35		588.175	54.0632
		1.95	538		11	39		1.95	484		16	39			71.318							559.463	-0.00385		459.274	-0.00529		517.391	15.3726		586.605	47.3571
		2	528		12	40		2	467		16	40			77.194							559.592	0.04313		459.403	0.03009		505.491	15.3925		587.413	59.5225
		2.05	520		8	41		2.05	473		20	41			72.943							559.721	-0.00649		459.533	0.00121		523.464	15.4582		585.773	44.655
		2.1	507		5	42		2.1	463		22	42			44.986							559.85	0.04132		459.662	0.01147		517.353	15.4678		581.123	53.7241
		2.15	402		6	43		2.15	466		18	43			49.963							559.979	0.01916		459.791	-0.01475		511.474	15.5145		597.957	56.8394
		2.2	429		5	44		2.2	488		9	44			33.383							560.108	0.03449		459.921	-0.02641		514.221	15.5355		592.695	54.6018
		2.25	457		7	45		2.25	503		11	45			97.925							560.237	-0.00643		460.05	0.01073		533.74	15.5749		599.026	56.5155
		2.3	413		5	46		2.3	516		4	46			89.097							560.366	-0.00358		460.179	-0.00737		532.912	15.6974		621.837	69.7256
		2.35	380		4	47		2.35	507		8	47			72.318							560.495	-0.02767		460.309	-0.02159		500.461	15.7657		596.34	47.8459
		2.4	417		3	48		2.4	499		12	48			66.017							560.624	0.02743		460.438	0.02742		504.943	15.777		607.53	63.6895
		2.45	394		3	49		2.45	459		6	49			28.707							560.753	-0.01399		460.567	-0.00167		534.985	15.8725		522.901	12.2913
		2.5	458		4	50		2.5	424		6	50			24.006							560.882	-0.01457		460.697	-0.00126		518.703	15.9038		516.497	15.5694
		2.55	440		6	51		2.55	434		8	51			30.433							561.01	-0.00904		460.826	-0.00958		505.634	16.0765		520.32	16.566
		2.6	451		3	52		2.6	392		7	52			98.75							561.139	0.02731		460.955	0.0705		521.647	16.0776		601.174	55.3199
		2.65	505		1	53		2.65	426		5	53			65.341							561.268	0.04199		461.085	0.0289		507.882	16.0975		597.636	67.4645
		2.7	520		3	54		2.7	406		5	54			95.824							561.397	0.01135		461.214	0.02998		523.349	16.1091		589.868	43.4904
		2.75	558		1	55		2.75	428		5	55			59.515							561.526	0.00232		461.343	-0.07192		505.421	16.1416		581.388	41.3287
		2.8	549		2	56		2.8	414		4	56			43.736							561.655	-0.008		461.472	0.04563		512.578	16.1483		611.341	59.2065
		2.85	559		1	57		2.85	463		0	57			65.942							561.784	0.04271		461.602	-0.04435		506.369	16.1704		601.682	56.9244
		2.9	516		1	58		2.9	416		4	58			56.864							561.913	-0.004		461.731	0.04971		519.559	16.1916		613.479	54.1044
		2.95	590		6	59		2.95	427		5	59			27.432							562.042	0.01245		461.86	0.00446		522.946	16.2348		603.492	48.6538
		3	537		2	60		3	416		2	60			70.593							562.171	0.04919		461.99	0.04005		511.014	16.2944		604.709	45.9515
		3.05	542		1	61		3.05	405		0	61			90.898							562.299	0.00713		462.119	0.02454		512.846	16.3757		610.781	53.8253
		3.1	480		3	62		3.1	419		2	62			77.5							562.428	-0.00992		462.248	-0.0549		520.307	16.5203		608.328	48.7135
		3.15	533		3	63		3.15	429		0	63			67.292							562.557	-0.01931		462.377	-0.02806		522.254	16.5579		588.88	51.0182
		3.2	542		1	64		3.2	451		2	64										562.686	0.04523		462.507	0.06348		534.773	16.6566		612.525	49.3038
		3.25	542		3	65		3.25	410		1	65										562.815	0.0043		462.636	-0.03475		520.892	16.7358		598.404	53.1009
		3.3	553		1	66		3.3	381		2	66										562.944	0.02192		462.765	0.00882		512.215	16.7594		586.176	46.4471
		3.35	519		0	67		3.35	446		1	67										563.073	-0.02343		462.894	-0.03291		517.916	16.8232		589.973	54.2099
		3.4	512		2	68		3.4	445		0	68										563.202	0.03082		463.024	0.00993		536.45	16.8963		599.718	58.5572
		3.45	531		2	69		3.45	477		0	69										563.33	0.01498		463.153	-0.01976		511.929	16.9288		577.543	52.1777
		3.5	556		3	70		3.5	429		2	70										563.459	0.04263		463.282	0.08567		517.103	16.9401		602.999	66.6316
		3.55	583		3	71		3.55	508		0	71										563.588	0.02104		463.411	-0.02231		519.952	16.9615		616.68	58.0447
		3.6	606		0	72		3.6	405		3	72										563.717	0.0395		463.541	0.01354		527.073	17.062		620.817	63.5416
		3.65	546		0	73		3.65	371		0	73										563.846	0.05602		463.67	-0.00068666		514.216	17.0738		597.228	63.2093
		3.7	535		0	74		3.7	437		4	74										563.975	0.01036		463.799	0.02263		522.33	17.1058		597.847	57.6123
		3.75	555		0	75		3.75	484		2	75										564.104	0.01172		463.928	-0.01444		521.106	17.1967		617.103	59.1609
		3.8	548		3	76		3.8	448		2	76										564.232	0.04241		464.058	0.02045		509.021	17.2201		588.326	52.7704
		3.85	583		1	77		3.85	373		4	77										564.361	0.08258		464.187	0.06059		522.621	17.2925		580.92	42.9318
		3.9	571		2	78		3.9	405		1	78										564.49	0.02859		464.316	-0.02989		512.527	17.3711		588.014	54.0329
		3.95	560		1	79		3.95	418		0	79										564.619	-0.00586		464.445	-0.03872		523.931	17.3905		607.454	69.9247
		4	555		1	80		4	443		0	80										564.748	0.03109		464.575	0.03988		516.986	17.3946		622.96	67.6156
		4.05	596		1	81		4.05	459		0	81										564.877	0.03812		464.704	-0.02079		512.234	17.6669		585.293	49.2544
		4.1	561		0	82		4.1	70		2	82										565.005	-0.000148645		464.833	0.14186		520.955	17.6911		591.427	60.6236
		4.15	566		1	83		4.15	33		1	83										565.134	0.05501		464.962	0.01662		509.339	17.694		587.556	53.133
		4.2	553		2	84		4.2	32		1	84										565.263	-0.01567		465.091	-0.00474		520.09	17.7629		600.911	59.5634
		4.25	542		1	85		4.25	37		2	85										565.392	0.03668		465.221	0.01746		522.838	17.8183		639.124	56.9229
		4.3	615		1	86		4.3	38		2	86										565.521	-0.0069		465.35	-0.0319		524.778	17.8465		582.044	41.9921
		4.35	530		1	87		4.35	45		1	87										565.65	0.08525		465.479	-0.00984		524.211	17.9564		591.732	47.1296
		4.4	583		2	88		4.4	43		3	88										565.778	0.0145		465.608	-0.00122		499.972	18.0465		589.936	45.9592
		4.45	543		2	89		4.45	34		2	89										565.907	-0.000692081		465.737	-0.00389		520.881	18.2322		612.134	65.8504
		4.5	555		1	90		4.5	42		4	90										566.036	0.0384		465.867	-0.00799		524.38	18.2745		595.916	49.2953
		4.55	593		2	91		4.55	36		3	91										566.165	0.03601		465.996	0.03572		527.734	18.4669		587.681	55.7814
		4.6	601		2	92		4.6	32		2	92										566.294	-0.01659		466.125	-0.02169		506.997	18.4732		610.985	52.9225
		4.65	341		2	93		4.65	41		2	93										566.422	0.04292		466.254	-0.0101		532.437	18.5487		602.322	56.8987
		4.7	91		1	94		4.7	51		4	94										566.551	-0.02302		466.383	0.01666		517.599	18.6643		580.019	41.9055
		4.75	531		0	95		4.75	44		2	95										566.68	0.0243		466.513	0.00489		514.829	18.7228		597.287	59.5409
		4.8	516		0	96		4.8	47		2	96										566.809	0.06392		466.642	0.07116		515.275	18.8124		595.316	84.5961
		4.85	512		1	97		4.85	40		1	97										566.938	0.01183		466.771	0.00521		513.974	18.8421		583.482	43.072
		4.9	494		1	98		4.9	28		1	98										567.066	0.0502		466.9	0.03226		523.646	18.9996		591.288	45.9331
		4.95	492		0	99		4.95	35		2	99										567.195	-0.01366		467.029	0.000633253		495.599	19.1614		587.037	45.971
		5	534		1	100		5	33		2	100										567.324	0.08713		467.158	0.02695		517.924	19.4575		590.747	49.0365
		5.05	503		1	101		5.05	28		1	101										567.453	0.04217		467.288	0.02632		508.612	19.5137		639.722	58.02
		5.1	475		0	102		5.1	39		1	102										567.581	0.00116		467.417	-0.0379		604.06	65.8919		595.528	51.2193
		5.15	512		0	103		5.15	33		2	103										567.71	0.09469		467.546	0.02433		564.231	53.5589		587.334	57.1699
		5.2	508		1	104		5.2	37		2	104										567.839	-0.01756		467.675	-0.03206		562.958	51.2888		592.934	58.1541
		5.25	416		0	105		5.25	29		2	105										567.968	0.00763		467.804	-0.03287		630.669	52.1452		612.745	61.464
		5.3	454		0	106		5.3	38		2	106										568.097	0.03845		467.933	-0.05311					587.036	47.8722
		5.35	461		1	107		5.35	49		2	107										568.225	0.04267		468.062	0.01762					578.532	42.2625
		5.4	491		1	108		5.4	58		2	108										568.354	0.07057		468.192	0.01919					598.308	64.0853
		5.45	462		0	109		5.45	59		2	109										568.483	0.05171		468.321	-0.04588					586.917	45.0708
		5.5	465		0	110		5.5	54		3	110										568.612	0.04066		468.45	-0.01033					587.918	39.5733
		5.55	451		0	111		5.55	77		0	111										568.74	0.09096		468.579	0.02008					577.864	48.9477
		5.6	487		0	112		5.6	70		4	112										568.869	0.05569		468.708	0.04503
		5.65	427		0	113		5.65	55		5	113										568.998	0.08501		468.837	0.01282
		5.7	475		0	114		5.7	74		0	114										569.127	0.07702		468.966	0.01064
		5.75	452		1	115		5.75	105		3	115										569.255	0.04204		469.096	0.04706
		5.8	480		1	116		5.8	98		2	116										569.384	0.04904		469.225	0.03514
		5.85	504		2	117		5.85	94		2	117										569.513	0.04733		469.354	0.02057
		5.9	464		1	118		5.9	88		1	118										569.641	0.07868		469.483	0.01522
		5.95	461		1	119		5.95	76		1	119										569.77	0.07687		469.612	0.10372
		6	470		2	120		6	83		1	120										569.899	0.02782		469.741	0.04725
		6.05	459		0	121		6.05	100		1	121										570.028	0.03401		469.87	-0.01472
		6.1	491		0	122		6.1	88		4	122										570.156	0.03659		469.999	0.01306
		6.15	547		0	123		6.15	104		3	123										570.285	0.02801		470.128	-0.02109
		6.2	534		2	124		6.2	93		0	124										570.414	0.04248		470.257	0.02429
		6.25	534		2	125		6.25	102		5	125										570.542	0.05679		470.387	0.00433
		6.3	573		0	126		6.3	85		2	126										570.671	0.08166		470.516	0.01168
		6.35	610		0	127		6.35	116		5	127										570.8	0.04356		470.645	-0.01173
		6.4	557		1	128		6.4	89		1	128										570.929	0.01758		470.774	0.01623
		6.45	542		1	129		6.45	107		4	129										571.057	0.07743		470.903	0.02043
		6.5	595		0	130		6.5	82		5	130										571.186	0.07538		471.032	0.04601
		6.55	554		2	131		6.55	113		2	131										571.315	0.05555		471.161	0.00826
		6.6	529		1	132		6.6	72		0	132										571.443	0.0567		471.29	0.02315
		6.65	533		1	133		6.65	259		2	133										571.572	0.06488		471.419	0.01088
		6.7	522		1	134		6.7	325		0	134										571.701	0.056		471.548	0.05153
		6.75	600		0	135		6.75	163		0	135										571.829	0.0348		471.677	-0.01344
		6.8	600		1	136		6.8	186		0	136										571.958	0.07854		471.806	0.03946
		6.85	580		1	137		6.85	178		1	137										572.087	0.06288		471.935	0.05768
		6.9	587		0	138		6.9	151		1	138										572.215	0.10114		472.065	0.01161
		6.95	555		1	139		6.95	160		1	139										572.344	0.07129		472.194	0.01708
		7	620		1	140		7	174		1	140										572.473	0.04613		472.323	0.04359
		7.05	575		1	141		7.05	156		1	141										572.601	0.07303		472.452	0.06583
		7.1	566		1	142		7.1	149		0	142										572.73	0.06044		472.581	0.0426
		7.15	516		0	143		7.15	118		1	143										572.859	0.05937		472.71	-0.00799
		7.2	586		1	144		7.2	146		0	144										572.987	0.06464		472.839	0.10891
		7.25	563		0	145		7.25	175		1	145										573.116	0.02952		472.968	-0.01376
		7.3	654		1	146		7.3	175		3	146										573.245	0.07502		473.097	0.00523
		7.35	591		0	147		7.35	160		0	147										573.373	0.06742		473.226	0.02107
		7.4	583		1	148		7.4	163		1	148										573.502	0.06262		473.355	0.0132
		7.45	591		1	149		7.45	146		2	149										573.63	0.07863		473.484	0.01168
		7.5	545		1	150		7.5	169		0	150										573.759	0.06417		473.613	-0.00953
		7.55	548		2	151		7.55	188		5	151										573.888	0.13974		473.742	0.04389
		7.6	579		2	152		7.6	151		1	152										574.016	0.06155		473.871	-0.00341
		7.65	624		1	153		7.65	171		2	153										574.145	0.07743		474	0.02441
		7.7	628		0	154		7.7	159		1	154										574.274	0.06023		474.129	-0.00184
		7.75	540		1	155		7.75	189		2	155										574.402	0.0638		474.258	0.07083
		7.8	600		0	156		7.8	173		1	156										574.531	0.04139		474.387	-0.00182
		7.85	566		1	157		7.85	175		0	157										574.659	0.09433		474.516	0.03935
		7.9	594		2	158		7.9	155		2	158										574.788	0.01178		474.645	-0.00661
		7.95	620		0	159		7.95	191		1	159										574.917	0.05383		474.774	0.01498
		8	483		1	160		8	162		3	160										575.045	0.13504		474.903	0.01173
		8.05	528		1	161		8.05	158		1	161										575.174	0.04088		475.032	-0.01166
		8.1	271		1	162		8.1	183		2	162										575.302	0.06093		475.161	0.05437
		8.15	369		2	163		8.15	153		3	163										575.431	0.07995		475.29	-0.01398
		8.2	366		0	164		8.2	162		1	164										575.56	0.14593		475.419	0.04443
		8.25	340		0	165		8.25	169		0	165										575.688	0.05619		475.548	0.01902
		8.3	351		0	166		8.3	151		1	166										575.817	0.11213		475.677	-0.01285
		8.35	397		0	167		8.35	194		1	167										575.945	0.12813		475.806	-0.02585
		8.4	379		1	168		8.4	175		2	168										576.074	0.08587		475.935	0.03397
		8.45	392		0	169		8.45	158		2	169										576.203	0.10064		476.064	0.02007
		8.5	387		2	170		8.5	171		0	170										576.331	0.05251		476.193	0.04814
		8.55	393		1	171		8.55	143		2	171										576.46	0.14075		476.322	0.0669
		8.6	394		1	172		8.6	151		0	172										576.588	0.1594		476.451	-0.00494
		8.65	392		1	173		8.65	62		3	173										576.717	0.10604		476.58	-0.03685
		8.7	371		2	174		8.7	48		2	174										576.845	0.08168		476.709	0.03628
		8.75	403		1	175		8.75	37		4	175										576.974	0.13448		476.838	0.04375
		8.8	381		1	176		8.8	56		0	176										577.102	0.12036		476.967	-0.04594
		8.85	391		1	177		8.85	54		0	177										577.231	0.17515		477.096	-0.000378935
		8.9	362		1	178		8.9	48		1	178										577.36	0.03642		477.225	0.02
		8.95	365		0	179		8.95	51		0	179										577.488	0.18822		477.353	0.000183109
		9	362		0	180		9	51		0	180										577.617	0.06794		477.482	0.0227
		9.05	402		0	181		9.05	51		1	181										577.745	0.05847		477.611	-0.00751
		9.1	385		1	182		9.1	110		0	182										577.874	0.08879		477.74	0.01881
		9.15	410		1	183		9.15	320		2	183										578.002	0.07387		477.869	0.02231
		9.2	360		0	184		9.2	253		0	184										578.131	0.14961		477.998	0.05631
		9.25	388		2	185		9.25	245		0	185										578.259	0.11415		478.127	0.04148
		9.3	397		0	186		9.3	352		2	186										578.388	0.07871		478.256	0.03998
		9.35	381		2	187		9.35	357		0	187										578.516	0.24143		478.385	0.01397
		9.4	388		0	188		9.4	375		1	188										578.645	0.13334		478.514	0.06108
		9.45	393		0	189		9.45	350		1	189										578.773	0.10998		478.643	0.01334
		9.5	358		2	190		9.5	395		1	190										578.902	0.16234		478.772	0.04091
		9.55	390		0	191		9.55	371		1	191										579.03	0.09175		478.901	-0.01348
		9.6	356		0	192		9.6	316		0	192										579.159	0.08775		479.029	0.00803
		9.65	383		1	193		9.65	332		0	193										579.287	0.17136		479.158	0.05729
		9.7	377		0	194		9.7	324		1	194										579.416	0.05588		479.287	0.03561
		9.75	389		1	195		9.75	271		1	195										579.544	0.13468		479.416	0.12169
		9.8	393		0	196		9.8	19		1	196										579.673	0.09274		479.545	0.02928
		9.85	338		0	197		9.85	31		0	197										579.801	0.13005		479.674	0.07649
		9.9	388		0	198		9.9	28		1	198										579.93	0.12417		479.803	-0.00839
		9.95	400		0	199		9.95	21		0	199										580.058	0.1501		479.932	0.02211
		10	361		0	200		10	32		0	200										580.187	0.06579		480.061	0.04723
		10.05	337		1	201		10.05	33		1	201										580.315	0.17756		480.189	0.06926
		10.1	359		0	202		10.1	21		1	202										580.444	0.17387		480.318	0.09385
		10.15	368		2	203		10.15	22		2	203										580.572	0.09138		480.447	-0.00255
		10.2	329		2	204		10.2	26		0	204										580.701	0.10713		480.576	0.01874
		10.25	399		0	205		10.25	30		0	205										580.829	0.13655		480.705	0.00188
		10.3	396		1	206		10.3	31		0	206										580.958	0.13424		480.834	0.04577
		10.35	359		0	207		10.35	37		1	207										581.086	0.27101		480.963	0.00279
		10.4	335		1	208		10.4	20		0	208										581.215	0.13327		481.091	-0.00399
		10.45	406		0	209		10.45	26		1	209										581.343	0.21371		481.22	0.06209
		10.5	387		1	210		10.5	26		1	210										581.472	0.14445		481.349	0.00411
		10.55	374		1	211		10.55	32		1	211										581.6	0.06831		481.478	-0.00207
		10.6	345		0	212		10.6	26		0	212										581.729	0.12171		481.607	-0.02271
		10.65	379		1	213		10.65	20		1	213										581.857	0.09982		481.736	0.09109
		10.7	359		0	214		10.7	22		1	214										581.985	0.21479		481.865	0.04143
		10.75	376		0	215		10.75	30		0	215										582.114	0.19887		481.993	0.02426
		10.8	364		1	216		10.8	36		3	216										582.242	0.10298		482.122	0.03687
		10.85	410		0	217		10.85	58		1	217										582.371	0.0877		482.251	0.05881
		10.9	414		0	218		10.9	33		1	218										582.499	0.14576		482.38	0.06477
		10.95	380		0	219		10.95	33		0	219										582.628	0.11866		482.509	0.02197
		11	392		1	220		11	38		2	220										582.756	0.20502		482.638	0.10329
		11.05	387		1	221		11.05	42		0	221										582.884	0.14369		482.766	0.02709
		11.1	381		1	222		11.1	54		3	222										583.013	0.09201		482.895	0.00689
		11.15	327		2	223		11.15	34		1	223										583.141	0.1812		483.024	0.02377
		11.2	380		1	224		11.2	48		3	224										583.27	0.19042		483.153	0.02058
		11.25	384		1	225		11.25	56		3	225										583.398	0.34349		483.282	0.04071
		11.3	386		0	226		11.3	52		3	226										583.526	0.10026		483.41	0.05438
		11.35	338		2	227		11.35	72		1	227										583.655	0.1426		483.539	0.00194
		11.4	351		1	228		11.4	64		0	228										583.783	0.22765		483.668	0.02305
		11.45	350		1	229		11.45	38		2	229										583.912	0.11661		483.797	0.00236
		11.5	333		0	230		11.5	32		0	230										584.04	0.09761		483.926	0.01356
		11.55	355		0	231		11.55	41		2	231										584.168	0.26936		484.054	0.02365
		11.6	397		0	232		11.6	47		3	232										584.297	0.11352		484.183	0.03556
		11.65	348		2	233		11.65	51		1	233										584.425	0.30077		484.312	0.07621
		11.7	319		1	234		11.7	48		1	234										584.554	0.16522		484.441	0.07946
		11.75	387		1	235		11.75	41		0	235										584.682	0.11662		484.57	0.00819
		11.8	349		2	236		11.8	33		2	236										584.81	0.17749		484.698	0.06949
		11.85	368		1	237		11.85	45		6	237										584.939	0.11475		484.827	0.0358
		11.9	390		0	238		11.9	53		1	238										585.067	0.2833		484.956	-0.00623
		11.95	349		1	239		11.95	40		1	239										585.196	0.22214		485.085	0.0798
		12	385		0	240		12	40		2	240										585.324	0.23787		485.213	0.0508
		12.05	361		1	241		12.05	38		2	241										585.452	0.12164		485.342	0.01917
		12.1	345		0	242		12.1	39		0	242										585.581	0.14191		485.471	0.01048
		12.15	319		0	243		12.15	26		3	243										585.709	0.08141		485.6	0.05588
		12.2	340		0	244		12.2	38		2	244										585.837	0.25978		485.728	0.12229
		12.25	358		1	245		12.25	42		4	245										585.966	0.17911		485.857	0.03094
		12.3	351		1	246		12.3	42		2	246										586.094	0.21215		485.986	0.03229
		12.35	341		2	247		12.35	44		1	247										586.222	0.12032		486.115	0.05993
		12.4	333		1	248		12.4	36		3	248										586.351	0.25069		486.243	0.08372
		12.45	315		1	249		12.45	51		1	249										586.479	0.20291		486.372	0.04805
		12.5	356		1	250		12.5	39		0	250										586.607	0.19032		486.501	0.05703
		12.55	369		0	251		12.55	48		1	251										586.736	0.09311		486.63	0.00214
		12.6	336		0	252		12.6	45		1	252										586.864	0.31223		486.758	0.08335
		12.65	344		0	253		12.65	34		3	253										586.992	0.23678		486.887	0.03946
		12.7	228		0	254		12.7	29		3	254										587.121	0.203		487.016	0.03232
		12.75	49		0	255		12.75	33		3	255										587.249	0.1725		487.144	0.02806
		12.8	50		1	256		12.8	41		0	256										587.377	0.21133		487.273	0.07622
		12.85	42		2	257		12.85	28		2	257										587.506	0.17115		487.402	0.02395
		12.9	47		1	258		12.9	47		3	258										587.634	0.22456		487.531	0.02707
		12.95	45		2	259		12.95	36		3	259										587.762	0.18966		487.659	0.09707
		13	31		1	260		13	38		2	260										587.891	0.21998		487.788	0.0971
		13.05	27		1	261		13.05	23		0	261										588.019	0.15861		487.917	0.06502
		13.1	31		1	262		13.1	19		1	262										588.147	0.23		488.045	0.03752
		13.15	28		1	263		13.15	15		1	263										588.275	0.10556		488.174	0.06686
		13.2	20		1	264		13.2	26		2	264										588.404	0.22114		488.303	0.1187
		13.25	39		2	265		13.25	16		2	265										588.532	0.21685		488.432	0.05023
		13.3	43		1	266		13.3	23		0	266										588.66	0.15076		488.56	0.02192
		13.35	42		2	267		13.35	22		2	267										588.789	0.32482		488.689	0.10431
		13.4	34		3	268		13.4	31		5	268										588.917	0.27925		488.818	0.07259
		13.45	22		1	269		13.45	25		6	269										589.045	0.2112		488.946	0.08161
		13.5	32		1	270		13.5	24		1	270										589.173	0.27187		489.075	0.0723
		13.55	28		1	271		13.55	18		4	271										589.302	0.22553		489.204	0.00774
		13.6	33		0	272		13.6	19		3	272										589.43	0.30877		489.332	0.12652
		13.65	23		1	273		13.65	25		7	273										589.558	0.22195		489.461	0.13976
		13.7	23		1	274		13.7	22		3	274										589.687	0.15075		489.59	0.00555
		13.75	33		1	275		13.75	33		2	275										589.815	0.1994		489.718	0.08646
		13.8	33		2	276		13.8	32		0	276										589.943	0.22971		489.847	0.0217
		13.85	28		2	277		13.85	35		5	277										590.071	0.27051		489.976	0.0472
		13.9	31		0	278		13.9	37		1	278										590.2	0.13591		490.104	0.11043
		13.95	29		0	279		13.95	31		0	279										590.328	0.17826		490.233	-0.0098
		14	140		0	280		14	33		3	280										590.456	0.21985		490.362	0.1063
		14.05	422		0	281		14.05	25		5	281										590.584	0.35763		490.49	0.06754
		14.1	537		0	282		14.1	22		1	282										590.713	0.15774		490.619	0.03693
		14.15	565		0	283		14.15	43		0	283										590.841	0.25206		490.748	0.11978
		14.2	575		1	284		14.2	44		0	284										590.969	0.19664		490.876	0.0421
		14.25	574		0	285		14.25	25		1	285										591.097	0.31923		491.005	0.04431
		14.3	581		1	286		14.3	22		3	286										591.226	0.14989		491.133	0.09896
		14.35	568		1	287		14.35	35		3	287										591.354	0.18466		491.262	0.11315
		14.4	605		1	288		14.4	34		0	288										591.482	0.22168		491.391	0.12196
		14.45	605		0	289		14.45	19		2	289										591.61	0.12686		491.519	0.08663
		14.5	596		2	290		14.5	23		1	290										591.738	0.18602		491.648	0.06058
		14.55	617		1	291		14.55	21		2	291										591.867	0.31906		491.777	0.08794
		14.6	615		0	292		14.6	29		2	292										591.995	0.09322		491.905	0.02675
		14.65	580		1	293		14.65	25		2	293										592.123	0.25543		492.034	0.08013
		14.7	618		0	294		14.7	24		2	294										592.251	0.22297		492.162	0.09752
		14.75	614		1	295		14.75	26		3	295										592.379	0.15186		492.291	0.06368
		14.8	645		1	296		14.8	36		2	296										592.508	0.27517		492.42	0.10288
		14.85	599		0	297		14.85	32		4	297										592.636	0.15856		492.548	0.08165
		14.9	576		1	298		14.9	25		4	298										592.764	0.24129		492.677	0.04478
		14.95	602		1	299		14.95	25		2	299										592.892	0.3843		492.805	0.15878
		15	585		0	300		15	30		3	300										593.02	0.22183		492.934	0.03451
		15.05	647		1	301		15.05	26		1	301										593.149	0.18271		493.063	0.0779
		15.1	578		0	302		15.1	29		3	302										593.277	0.19681		493.191	0.07324
		15.15	615		2	303		15.15	29		1	303										593.405	0.19466		493.32	0.07598
		15.2	586		1	304		15.2	28		2	304										593.533	0.28019		493.448	0.14336
		15.25	568		2	305		15.25	22		0	305										593.661	0.24941		493.577	0.16755
		15.3	510		2	306		15.3	26		4	306										593.789	0.29488		493.705	0.00806
		15.35	602		1	307		15.35	22		2	307										593.918	0.26657		493.834	0.13951
		15.4	547		1	308		15.4	22		3	308										594.046	0.22751		493.963	0.07288
		15.45	563		0	309		15.45	22		2	309										594.174	0.39156		494.091	0.08775
		15.5	578		0	310		15.5	28		2	310										594.302	0.26987		494.22	0.16341
		15.55	567		1	311		15.55	29		0	311										594.43	0.4026		494.348	0.11803
		15.6	548		1	312		15.6	25		4	312										594.558	0.29427		494.477	0.15155
		15.65	501		0	313		15.65	24		2	313										594.687	0.31306		494.605	0.03122
		15.7	567		0	314		15.7	37		4	314										594.815	0.35386		494.734	0.1581
		15.75	190		3	315		15.75	33		2	315										594.943	0.26113		494.862	0.13237
		15.8	34		1	316		15.8	24		4	316										595.071	0.18859		494.991	0.10189
		15.85	54		0	317		15.85	26		4	317										595.199	0.22735		495.12	0.20624
		15.9	41		0	318		15.9	27		3	318										595.327	0.29033		495.248	0.1965
		15.95	41		2	319		15.95	22		4	319										595.455	0.14682		495.377	0.04446
		16	36		1	320		16	19		5	320										595.584	0.42741		495.505	0.20357
		16.05	41		0	321		16.05	27		2	321										595.712	0.22871		495.634	0.19558
		16.1	32		1	322		16.1	20		4	322										595.84	0.29298		495.762	0.05712
		16.15	28		0	323		16.15	35		0	323										595.968	0.23907		495.891	0.17161
		16.2	35		1	324		16.2	26		2	324										596.096	0.23566		496.019	0.14741
		16.25	38		0	325		16.25	20		2	325										596.224	0.22518		496.148	0.05018
		16.3	35		0	326		16.3	28		4	326										596.352	0.21637		496.276	0.12687
		16.35	40		2	327		16.35	16		2	327										596.48	0.31798		496.405	0.19884
		16.4	36		0	328		16.4	28		1	328										596.608	0.34784		496.533	0.16204
		16.45	26		2	329		16.45	28		3	329										596.737	0.24936		496.662	0.19486
		16.5	41		1	330		16.5	26		1	330										596.865	0.24707		496.79	0.25527
		16.55	39		1	331		16.55	28		1	331										596.993	0.21433		496.919	0.14631
		16.6	38		0	332		16.6	26		3	332										597.121	0.26959		497.047	0.07501
		16.65	31		5	333		16.65	29		3	333										597.249	0.39641		497.176	0.14873
		16.7	38		3	334		16.7	21		1	334										597.377	0.22584		497.304	0.1211
		16.75	32		1	335		16.75	31		3	335										597.505	0.28005		497.433	0.16618
		16.8	39		1	336		16.8	29		1	336										597.633	0.3415		497.561	0.11447
		16.85	40		3	337		16.85	31		0	337										597.761	0.20572		497.69	0.11694
		16.9	36		3	338		16.9	25		1	338										597.889	0.36879		497.818	0.30694
		16.95	34		2	339		16.95	30		2	339										598.017	0.39369		497.947	0.30768
		17	33		3	340		17	16		5	340										598.145	0.21883		498.075	0.13277
		17.05	36		2	341		17.05	21		1	341										598.273	0.24709		498.204	0.24834
		17.1	48		0	342		17.1	24		1	342										598.402	0.21903		498.332	0.21183
		17.15	36		0	343		17.15	17		0	343										598.53	0.27356		498.461	0.16183
		17.2	37		1	344		17.2	28		2	344										598.658	0.2843		498.589	0.12064
		17.25	35		2	345		17.25	19		3	345										598.786	0.27347		498.717	0.2372
		17.3	33		0	346		17.3	30		2	346										598.914	0.47651		498.846	0.173
		17.35	40		1	347		17.35	27		1	347										599.042	0.15822		498.974	0.14318
		17.4	39		2	348		17.4	28		2	348										599.17	0.28468		499.103	0.30524
		17.45	21		2	349		17.45	25		2	349										599.298	0.38631		499.231	0.1699
		17.5	26		1	350		17.5	25		2	350										599.426	0.2832		499.36	0.25505
		17.55	39		4	351		17.55	24		2	351										599.554	0.27813		499.488	0.17135
		17.6	22		1	352		17.6	26		4	352										599.682	0.20748		499.617	0.24425
		17.65	34		1	353		17.65	16		2	353										599.81	0.27314		499.745	0.25839
		17.7	21		0	354		17.7	25		2	354										599.938	0.31229		499.873	0.29552
		17.75	34		4	355		17.75	32		3	355										600.066	0.34018		500.002	0.30842
		17.8	20		2	356		17.8	24		4	356										600.194	0.26443		500.13	0.28849
		17.85	34		0	357		17.85	31		2	357										600.322	0.18386		500.259	0.11738
		17.9	25		3	358		17.9	25		1	358										600.45	0.21349		500.387	0.29437
		17.95	30		5	359		17.95	24		0	359										600.578	0.30843		500.516	0.22251
		18	22		2	360		18	28		2	360										600.706	0.33309		500.644	0.24118
		18.05	31		4	361		18.05	29		3	361										600.834	0.23386		500.772	0.2291
		18.1	32		3	362		18.1	20		1	362										600.962	0.34543		500.901	0.39072
		18.15	25		0	363		18.15	19		3	363										601.09	0.37869		501.029	0.35133
		18.2	32		2	364		18.2	25		1	364										601.218	0.39819		501.158	0.3707
		18.25	33		2	365		18.25	27		2	365										601.346	0.30289		501.286	0.3269
		18.3	40		2	366		18.3	16		2	366										601.474	0.28226		501.414	0.2464
		18.35	44		1	367		18.35	21		1	367										601.602	0.49144		501.543	0.31524
		18.4	30		4	368		18.4	30		3	368										601.73	0.30175		501.671	0.22603
		18.45	32		5	369		18.45	17		1	369										601.858	0.28241		501.8	0.20888
		18.5	38		1	370		18.5	27		2	370										601.986	0.3006		501.928	0.39989
		18.55	41		3	371		18.55	24		4	371										602.114	0.39512		502.056	0.34056
		18.6	32		0	372		18.6	18		1	372										602.242	0.46473		502.185	0.3687
		18.65	26		0	373		18.65	19		2	373										602.37	0.15129		502.313	0.2359
		18.7	26		1	374		18.7	30		1	374										602.498	0.3202		502.441	0.3197
		18.75	26		2	375		18.75	27		5	375										602.626	0.26699		502.57	0.29469
		18.8	38		1	376		18.8	28		0	376										602.754	0.22513		502.698	0.24297
		18.85	41		3	377		18.85	36		2	377										602.882	0.28587		502.826	0.3729
		18.9	25		2	378		18.9	24		1	378										603.01	0.30325		502.955	0.51226
		18.95	28		3	379		18.95	31		0	379										603.138	0.28124		503.083	0.43639
		19	22		5	380		19	24		4	380										603.266	0.32622		503.212	0.39117
		19.05	28		4	381		19.05	32		2	381										603.394	0.335		503.34	0.39068
		19.1	34		1	382		19.1	25		0	382										603.522	0.22839		503.468	0.38953
		19.15	17		2	383		19.15	17		0	383										603.649	0.22156		503.597	0.39789
		19.2	26		3	384		19.2	24		3	384										603.777	0.34047		503.725	0.37403
		19.25	24		2	385		19.25	20		1	385										603.905	0.24849		503.853	0.39075
		19.3	24		2	386		19.3	21		2	386										604.033	0.31783		503.982	0.37779
		19.35	30		7	387		19.35	21		1	387										604.161	0.22523		504.11	0.64024
		19.4	161		4	388		19.4	20		2	388										604.289	0.31805		504.238	0.46851
		19.45	216		2	389		19.45	23		0	389										604.417	0.36372		504.367	0.52147
		19.5	27		3	390		19.5	27		1	390										604.545	0.2671		504.495	0.37172
		19.55	31		5	391		19.55	22		4	391										604.673	0.40888		504.623	0.52881
		19.6	30		4	392		19.6	34		3	392										604.801	0.26376		504.752	0.38727
		19.65	21		6	393		19.65	22		0	393										604.929	0.32896		504.88	0.52194
		19.7	21		4	394		19.7	21		1	394										605.057	0.30037		505.008	0.56717
		19.75	29		3	395		19.75	17		2	395										605.184	0.23811		505.137	0.36778
		19.8	35		3	396		19.8	19		1	396										605.312	0.32217		505.265	0.5238
		19.85	28		3	397		19.85	21		1	397										605.44	0.27861		505.393	0.50991
		19.9	25		1	398		19.9	30		2	398										605.568	0.17216		505.521	0.52373
		19.95	28		4	399		19.95	35		2	399										605.696	0.37423		505.65	0.5389
		20	21		3	400		20	21		3	400										605.824	0.28567		505.778	0.62088
		20.05	27		2	401		20.05	19		2	401										605.952	0.42861		505.906	0.69795
		20.1	28		4	402		20.1	24		2	402										606.08	0.23847		506.035	0.50839
		20.15	569		1	403		20.15	26		2	403										606.208	0.34789		506.163	0.51939
		20.2	542		1	404		20.2	30		0	404										606.335	0.24975		506.291	0.68593
		20.25	584		2	405		20.25	29		4	405										606.463	0.23829		506.419	0.48616
		20.3	572		1	406		20.3	27		1	406										606.591	0.35946		506.548	0.54131
		20.35	562		2	407		20.35	25		3	407										606.719	0.37206		506.676	0.5976
		20.4	569		4	408		20.4	33		1	408										606.847	0.35821		506.804	0.70297
		20.45	589		0	409		20.45	24		3	409										606.975	0.29137		506.933	0.57347
		20.5	570		4	410		20.5	12		6	410										607.103	0.4114		507.061	0.82074
		20.55	536		1	411		20.55	34		2	411										607.23	0.27472		507.189	0.7759
		20.6	548		4	412		20.6	25		1	412										607.358	0.32085		507.317	0.71361
		20.65	615		2	413		20.65	31		2	413										607.486	0.35596		507.446	0.58973
		20.7	592		2	414		20.7	19		2	414										607.614	0.26134		507.574	0.64826
		20.75	560		2	415		20.75	23		1	415										607.742	0.25304		507.702	0.5849
		20.8	607		1	416		20.8	25		5	416										607.87	0.3235		507.83	0.63309
		20.85	594		1	417		20.85	23		0	417										607.997	0.31048		507.959	0.83709
		20.9	581		0	418		20.9	21		3	418										608.125	0.38903		508.087	0.64108
		20.95	586		4	419		20.95	16		4	419										608.253	0.33736		508.215	0.73431
		21	541		4	420		21	18		2	420										608.381	0.32636		508.343	0.68688
		21.05	564		2	421		21.05	17		2	421										608.509	0.27083		508.471	0.61836
		21.1	560		3	422		21.1	21		4	422										608.637	0.39446		508.6	0.71698
		21.15	606		0	423		21.15	21		1	423										608.764	0.25856		508.728	0.7007
		21.2	545		0	424		21.2	32		4	424										608.892	0.30856		508.856	0.66903
		21.25	510		2	425		21.25	31		1	425										609.02	0.27252		508.984	0.71712
		21.3	599		3	426		21.3	16		1	426										609.148	0.26911		509.113	0.62279
		21.35	570		3	427		21.35	28		5	427										609.276	0.35763		509.241	0.89841
		21.4	593		3	428		21.4	27		2	428										609.403	0.2713		509.369	0.71755
		21.45	529		4	429		21.45	26		2	429										609.531	0.41644		509.497	0.77445
		21.5	552		1	430		21.5	29		2	430										609.659	0.17538		509.625	0.78385
		21.55	510		2	431		21.55	37		1	431										609.787	0.2901		509.754	0.81798
		21.6	518		0	432		21.6	30		1	432										609.915	0.35016		509.882	0.70951
		21.65	515		1	433		21.65	20		1	433										610.042	0.34016		510.01	0.83221
		21.7	572		2	434		21.7	24		2	434										610.17	0.36053		510.138	0.65518
		21.75	502		3	435		21.75	30		0	435										610.298	0.3274		510.266	0.79368
		21.8	520		0	436		21.8	39		3	436										610.426	0.38517		510.395	0.73592
		21.85	536		3	437		21.85	31		7	437										610.553	0.29603		510.523	0.79114
		21.9	531		2	438		21.9	23		1	438										610.681	0.27706		510.651	0.69201
		21.95	537		2	439		21.95	19		2	439										610.809	0.34174		510.779	0.77133
		22	560		4	440		22	18		0	440										610.937	0.28267		510.907	0.87676
		22.05	556		2	441		22.05	31		0	441										611.065	0.42664		511.035	0.94448
		22.1	575		0	442		22.1	23		1	442										611.192	0.214		511.164	0.77162
		22.15	602		1	443		22.15	24		3	443										611.32	0.33772		511.292	0.78747
		22.2	536		1	444		22.2	27		2	444										611.448	0.44338		511.42	0.73134
		22.25	512		0	445		22.25	27		2	445										611.576	0.36815		511.548	0.81384
		22.3	509		4	446		22.3	18		3	446										611.703	0.29806		511.676	0.71325
		22.35	552		3	447		22.35	26		3	447										611.831	0.24976		511.804	0.65833
		22.4	552		3	448		22.4	29		1	448										611.959	0.23418		511.933	0.75155
		22.45	507		1	449		22.45	16		0	449										612.086	0.43998		512.061	0.69002
		22.5	384		0	450		22.5	35		3	450										612.214	0.2594		512.189	0.69292
		22.55	535		4	451		22.55	25		2	451										612.342	0.31252		512.317	0.83608
		22.6	524		4	452		22.6	27		4	452										612.47	0.46451		512.445	0.88807
		22.65	528		0	453		22.65	35		1	453										612.597	0.26436		512.573	0.53771
		22.7	540		1	454		22.7	30		4	454										612.725	0.37431		512.701	0.68685
		22.75	577		2	455		22.75	38		1	455										612.853	0.28986		512.83	0.6877
		22.8	537		3	456		22.8	26		2	456										612.981	0.36312		512.958	0.67081
		22.85	562		5	457		22.85	19		1	457										613.108	0.35993		513.086	0.67497
		22.9	554		3	458		22.9	33		1	458										613.236	0.26465		513.214	0.75303
		22.95	521		3	459		22.95	22		3	459										613.364	0.3859		513.342	0.75331
		23	571		4	460		23	22		0	460										613.491	0.46594		513.47	1
		23.05	559		3	461		23.05	28		3	461										613.619	0.24519		513.598	0.54701
		23.1	574		5	462		23.1	24		1	462										613.747	0.34228		513.726	0.79706
		23.15	573		3	463		23.15	27		2	463										613.874	0.30796		513.854	0.59966
		23.2	524		3	464		23.2	21		1	464										614.002	0.29856		513.983	0.55898
		23.25	599		3	465		23.25	35		3	465										614.13	0.34495		514.111	0.6205
		23.3	562		2	466		23.3	20		2	466										614.258	0.13539		514.239	0.6585
		23.35	540		1	467		23.35	31		1	467										614.385	0.43238		514.367	0.62666
		23.4	571		2	468		23.4	26		1	468										614.513	0.32147		514.495	0.66523
		23.45	576		1	469		23.45	28		1	469										614.641	0.5		514.623	0.97129
		23.5	554		2	470		23.5	22		0	470										614.768	0.32595		514.751	0.76786
		23.55	601		2	471		23.55	24		2	471										614.896	0.3105		514.879	0.69317
		23.6	542		5	472		23.6	18		0	472										615.024	0.23251		515.007	0.58122
		23.65	552		3	473		23.65	26		1	473										615.151	0.46576		515.135	0.82154
		23.7	597		2	474		23.7	17		1	474										615.279	0.37322		515.263	0.67774
		23.75	535		2	475		23.75	15		1	475										615.407	0.37558		515.392	0.71204
		23.8	540		4	476		23.8	17		3	476										615.534	0.28329		515.52	0.56992
		23.85	556		5	477		23.85	29		2	477										615.662	0.2626		515.648	0.5405
		23.9	586		2	478		23.9	28		1	478										615.789	0.33129		515.776	0.57224
		23.95	584		4	479		23.95	15		0	479										615.917	0.30411		515.904	0.59416
		24	541		5	480		24	24		1	480										616.045	0.35053		516.032	0.43462
		24.05	533		0	481		24.05	17		3	481										616.172	0.32393		516.16	0.56841
		24.1	566		2	482		24.1	15		0	482										616.3	0.30283		516.288	0.46077
		24.15	580		3	483		24.15	26		0	483										616.428	0.32779		516.416	0.71809
		24.2	596		6	484		24.2	23		3	484										616.555	0.32065		516.544	0.65002
		24.25	594		1	485		24.25	27		0	485										616.683	0.25537		516.672	0.59243
		24.3	623		3	486		24.3	17		1	486										616.81	0.22822		516.8	0.50492
		24.35	554		5	487		24.35	32		0	487										616.938	0.40068		516.928	0.45544
		24.4	509		8	488		24.4	24		2	488										617.066	0.28581		517.056	0.56032
		24.45	563		6	489		24.45	22		2	489										617.193	0.25717		517.184	0.48542
		24.5	576		5	490		24.5	27		0	490										617.321	0.35791		517.312	0.62965
		24.55	596		4	491		24.55	19		0	491										617.449	0.30969		517.44	0.40984
		24.6	591		8	492		24.6	26		0	492										617.576	0.30689		517.568	0.53294
		24.65	550		3	493		24.65	21		2	493										617.704	0.32868		517.696	0.48288
		24.7	539		9	494		24.7	22		0	494										617.831	0.26559		517.824	0.39905
		24.75	585		4	495		24.75	19		2	495										617.959	0.38216		517.952	0.4178
		24.8	514		6	496		24.8	18		0	496										618.087	0.27056		518.08	0.41806
		24.85	307		3	497		24.85	31		0	497										618.214	0.26232		518.208	0.43258
		24.9	490		3	498		24.9	31		1	498										618.342	0.33321		518.336	0.53096
		24.95	531		3	499		24.95	23		1	499										618.469	0.32789		518.464	0.4366
		25	526		9	500		25	24		0	500										618.597	0.35317		518.592	0.41694
		25.05	503		6	501		25.05	23		1	501										618.724	0.27185		518.72	0.51019
		25.1	552		8	502		25.1	32		1	502										618.852	0.29113		518.848	0.37744
		25.15	531		5	503		25.15	26		3	503										618.98	0.3561		518.976	0.42921
		25.2	567		7	504		25.2	22		1	504										619.107	0.24889		519.104	0.39063
		25.25	554		7	505		25.25	19		0	505										619.235	0.46093		519.232	0.40444
		25.3	548		4	506		25.3	16		1	506										619.362	0.2947		519.36	0.41993
		25.35	554		9	507		25.35	23		1	507										619.49	0.34405		519.488	0.33342
		25.4	538		7	508		25.4	14		2	508										619.617	0.32163		519.616	0.40177
		25.45	537		12	509		25.45	28		1	509										619.745	0.25967		519.744	0.40829
		25.5	548		8	510		25.5	23		1	510										619.872	0.33013		519.872	0.48815
		25.55	521		8	511		25.55	23		1	511										620	0.25574		520	0.44802
		25.6	500		12	512		25.6	20		1	512										620.128	0.28838		520.128	0.41787
		25.65	524		14	513		25.65	25		0	513										620.255	0.36485		520.256	0.42982
		25.7	236		13	514		25.7	21		0	514										620.383	0.43038		520.384	0.41942
		25.75	225		10	515		25.75	20		3	515										620.51	0.34965		520.512	0.41983
		25.8	258		12	516		25.8	26		1	516										620.638	0.20839		520.64	0.37068
		25.85	149		7	517		25.85	31		3	517										620.765	0.34729		520.768	0.61782
		25.9	334		11	518		25.9	20		1	518										620.893	0.28706		520.896	0.40783
		25.95	36		14	519		25.95	22		0	519										621.02	0.28742		521.024	0.27561
		26	233		17	520		26	23		0	520										621.148	0.23798		521.152	0.23013
		26.05	548		17	521		26.05	15		1	521										621.275	0.28003		521.279	0.21094
		26.1	519		10	522		26.1	26		0	522										621.403	0.31908		521.407	0.41075
		26.15	563		23	523		26.15	27		0	523										621.53	0.27635		521.535	0.29511
		26.2	564		19	524		26.2	13		0	524										621.658	0.20717		521.663	0.4329
		26.25	587		13	525		26.25	22		0	525										621.785	0.28185		521.791	0.28713
		26.3	581		11	526		26.3	23		0	526										621.913	0.36575		521.919	0.50089
		26.35	572		23	527		26.35	21		0	527										622.04	0.41333		522.047	0.3087
		26.4	606		25	528		26.4	28		0	528										622.168	0.28302		522.175	0.34722
		26.45	621		11	529		26.45	23		1	529										622.295	0.27676		522.303	0.29826
		26.5	600		18	530		26.5	19		0	530										622.423	0.33039		522.431	0.36221
		26.55	589		20	531		26.55	19		1	531										622.55	0.33499		522.559	0.23698
		26.6	577		18	532		26.6	18		1	532										622.678	0.24913		522.686	0.30226
		26.65	554		23	533		26.65	20		0	533										622.805	0.28323		522.814	0.19503
		26.7	573		19	534		26.7	20		0	534										622.933	0.42788		522.942	0.39533
		26.75	533		29	535		26.75	21		0	535										623.06	0.21462		523.07	0.21718
		26.8	554		25	536		26.8	30		0	536										623.188	0.38401		523.198	0.36256
		26.85	551		33	537		26.85	27		1	537										623.315	0.20474		523.326	0.23575
		26.9	551		21	538		26.9	26		0	538										623.442	0.24935		523.454	0.2182
		26.95	593		24	539		26.95	39		2	539										623.57	0.29443		523.582	0.30242
		27	565		27	540		27	33		0	540										623.697	0.35593		523.71	0.38782
		27.05	555		32	541		27.05	28		0	541										623.825	0.24066		523.837	0.22092
		27.1	560		35	542		27.1	25		0	542										623.952	0.36229		523.965	0.4012
		27.15	559		32	543		27.15	26		0	543										624.08	0.27646		524.093	0.30922
		27.2	553		35	544		27.2	28		0	544										624.207	0.36651		524.221	0.30031
		27.25	588		26	545		27.25	25		1	545										624.335	0.27775		524.349	0.24013
		27.3	567		25	546		27.3	30		0	546										624.462	0.36214		524.477	0.42969
		27.35	593		30	547		27.35	31		0	547										624.589	0.16754		524.605	0.15468
		27.4	568		36	548		27.4	27		0	548										624.717	0.29237		524.732	0.31062
		27.45	526		31	549		27.45	21		1	549										624.844	0.4091		524.86	0.30475
		27.5	599		26	550		27.5	26		0	550										624.972	0.30142		524.988	0.25845
		27.55	529		24	551		27.55	31		0	551										625.099	0.26416		525.116	0.20639
		27.6	580		32	552		27.6	19		1	552										625.227	0.38		525.244	0.30996
		27.65	587		24	553		27.65	25		0	553										625.354	0.41316		525.372	0.25638
		27.7	537		32	554		27.7	20		0	554										625.481	0.1602		525.499	0.20899
		27.75	540		40	555		27.75	28		0	555										625.609	0.26521		525.627	0.18218
		27.8	576		34	556		27.8	20		0	556										625.736	0.23009		525.755	0.26234
		27.85	507		27	557		27.85	19		1	557										625.864	0.21704		525.883	0.24151
		27.9	514		29	558		27.9	18		1	558										625.991	0.32676		526.011	0.12562
		27.95	533		34	559		27.95	19		0	559										626.118	0.24173		526.139	0.29533
		28	573		43	560		28	25		0	560										626.246	0.28114		526.266	0.26345
		28.05	543		28	561		28.05	18		1	561										626.373	0.21527		526.394	0.31464
		28.1	539		34	562		28.1	16		1	562										626.501	0.33854		526.522	0.14631
		28.15	554		33	563		28.15	26		0	563										626.628	0.34063		526.65	0.26887
		28.2	520		26	564		28.2	24		2	564										626.755	0.2655		526.778	0.25212
		28.25	549		29	565		28.25	17		0	565										626.883	0.29718		526.905	0.24704
		28.3	552		49	566		28.3	14		0	566										627.01	0.1803		527.033	0.2027
		28.35	578		33	567		28.35	27		0	567										627.137	0.2864		527.161	0.28717
		28.4	635		34	568		28.4	22		0	568										627.265	0.25979		527.289	0.2542
		28.45	564		45	569		28.45	25		0	569										627.392	0.29966		527.416	0.21305
		28.5	590		23	570		28.5	22		1	570										627.52	0.25776		527.544	0.10569
		28.55	595		25	571		28.55	22		0	571										627.647	0.24926		527.672	0.22225
		28.6	571		25	572		28.6	31		0	572										627.774	0.40611		527.8	0.18775
		28.65	564		28	573		28.65	26		0	573										627.902	0.15385		527.928	0.10315
		28.7	550		22	574		28.7	17		1	574										628.029	0.37512		528.055	0.18756
		28.75	563		31	575		28.75	19		0	575										628.156	0.44362		528.183	0.32546
		28.8	241		33	576		28.8	28		0	576										628.284	0.29075		528.311	0.17718
		28.85	404		30	577		28.85	25		0	577										628.411	0.21352		528.439	0.2123
		28.9	555		31	578		28.9	23		0	578										628.538	0.29074		528.566	0.2439
		28.95	545		19	579		28.95	27		1	579										628.666	0.29376		528.694	0.18272
		29	497		32	580		29	19		0	580										628.793	0.31495		528.822	0.11169
		29.05	590		30	581		29.05	22		0	581										628.92	0.23827		528.95	0.3701
		29.1	528		31	582		29.1	25		0	582										629.048	0.33804		529.077	0.20176
		29.15	563		28	583		29.15	18		0	583										629.175	0.3081		529.205	0.21043
		29.2	571		23	584		29.2	26		0	584										629.302	0.28374		529.333	0.19861
		29.25	561		21	585		29.25	25		0	585										629.43	0.36062		529.461	0.3448
		29.3	531		33	586		29.3	24		0	586										629.557	0.31381		529.588	0.11882
		29.35	551		17	587		29.35	20		0	587										629.684	0.16476		529.716	0.12185
		29.4	544		24	588		29.4	20		0	588										629.811	0.26303		529.844	0.23651
		29.45	587		22	589		29.45	21		0	589										629.939	0.39452		529.971	0.1257
		29.5	567		14	590		29.5	16		0	590										630.066	0.28137		530.099	0.17615
		29.55	560		25	591		29.55	21		1	591										630.193	0.30067		530.227	0.28359
		29.6	556		20	592		29.6	23		0	592										630.321	0.27677		530.355	0.24252
		29.65	513		18	593		29.65	18		0	593										630.448	0.22274		530.482	0.12793
		29.7	566		17	594		29.7	14		0	594										630.575	0.2545		530.61	0.191
		29.75	549		19	595		29.75	17		0	595										630.702	0.27469		530.738	0.22935
		29.8	561		17	596		29.8	28		0	596										630.83	0.27637		530.865	0.19145
		29.85	355		17	597		29.85	23		0	597										630.957	0.25389		530.993	0.19557
		29.9	474		17	598		29.9	18		1	598										631.084	0.32442		531.121	0.15864
		29.95	521		11	599		29.95	20		0	599										631.212	0.1644		531.249	0.16205
		30	568		18	600		30	22		1	600										631.339	0.24748		531.376	0.14264
		30.05	600		16	601		30.05	18		0	601										631.466	0.29867		531.504	0.12158
		30.1	529		14	602		30.1	31		0	602										631.593	0.19039		531.632	0.16005
		30.15	520		17	603		30.15	23		0	603										631.721	0.29609		531.759	0.17339
		30.2	501		14	604		30.2	23		0	604										631.848	0.32796		531.887	0.12585
		30.25	545		9	605		30.25	28		0	605										631.975	0.17837		532.015	0.17499
		30.3	500		11	606		30.3	24		0	606										632.102	0.2744		532.142	0.23443
		30.35	542		11	607		30.35	26		0	607										632.23	0.32885		532.27	0.13256
		30.4	541		4	608		30.4	17		0	608										632.357	0.28238		532.398	0.16669
		30.45	530		4	609		30.45	24		0	609										632.484	0.27842		532.525	0.08812
		30.5	550		11	610		30.5	21		0	610										632.611	0.24715		532.653	0.12624
		30.55	558		7	611		30.55	23		0	611										632.739	0.30262		532.781	0.19489
		30.6	511		6	612		30.6	21		0	612										632.866	0.24436		532.908	0.14014
		30.65	552		5	613		30.65	27		0	613										632.993	0.31582		533.036	0.06207
		30.7	502		5	614		30.7	29		0	614										633.12	0.3614		533.164	0.19836
		30.75	519		8	615		30.75	42		0	615										633.247	0.23		533.291	0.0843
		30.8	492		8	616		30.8	24		0	616										633.375	0.21037		533.419	0.09447
		30.85	520		2	617		30.85	23		0	617										633.502	0.29449		533.546	0.10556
		30.9	510		5	618		30.9	33		0	618										633.629	0.2168		533.674	0.11653
		30.95	562		5	619		30.95	40		0	619										633.756	0.2828		533.802	0.04675
		31	518		9	620		31	33		0	620										633.883	0.2344		533.929	0.15573
		31.05	530		6	621		31.05	21		0	621										634.011	0.41059		534.057	0.08444
		31.1	517		6	622		31.1	22		0	622										634.138	0.14236		534.185	0.14471
		31.15	535		3	623		31.15	24		0	623										634.265	0.28577		534.312	0.10818
		31.2	552		4	624		31.2	27		0	624										634.392	0.21983		534.44	0.11152
		31.25	518		5	625		31.25	24		0	625										634.519	0.25258		534.567	0.1643
		31.3	490		6	626		31.3	25		0	626										634.647	0.21412		534.695	0.09321
		31.35	513		0	627		31.35	21		0	627										634.774	0.24678		534.823	0.11212
		31.4	532		6	628		31.4	24		0	628										634.901	0.18901		534.95	0.13037
		31.45	508		4	629		31.45	28		0	629										635.028	0.25445		535.078	0.07288
		31.5	559		2	630		31.5	18		0	630										635.155	0.23059		535.205	0.07016
		31.55	579		1	631		31.55	30		0	631										635.282	0.21424		535.333	0.15493
		31.6	548		4	632		31.6	28		0	632										635.41	0.26096		535.461	0.04278
		31.65	541		3	633		31.65	42		0	633										635.537	0.13874		535.588	0.19271
		31.7	546		1	634		31.7	42		0	634										635.664	0.33547		535.716	0.12692
		31.75	476		1	635		31.75	40		0	635										635.791	0.15405		535.843	0.13807
		31.8	543		1	636		31.8	32		0	636										635.918	0.19681		535.971	0.03506
		31.85	524		2	637		31.85	35		0	637										636.045	0.25832		536.099	0.0733
		31.9	536		4	638		31.9	30		0	638										636.173	0.22982		536.226	0.11575
		31.95	549		4	639		31.95	15		0	639										636.3	0.18146		536.354	0.10042
		32	503		4	640		32	23		0	640										636.427	0.1325		536.481	0.06806
		32.05	507		4	641		32.05	28		0	641										636.554	0.26491		536.609	0.07119
		32.1	539		2	642		32.1	26		0	642										636.681	0.19038		536.736	0.09396
		32.15	527		3	643		32.15	25		0	643										636.808	0.28441		536.864	0.18556
		32.2	528		3	644		32.2	21		0	644										636.935	0.20067		536.991	0.08858
		32.25	533		3	645		32.25	34		0	645										637.062	0.20636		537.119	0.08682
		32.3	551		1	646		32.3	29		0	646										637.19	0.28379		537.247	0.08406
		32.35	494		2	647		32.35	30		0	647										637.317	0.23056		537.374	0.11359
		32.4	547		0	648		32.4	21		0	648										637.444	0.26422		537.502	0.06202
		32.45	598		3	649		32.45	33		0	649										637.571	0.25661		537.629	0.10805
		32.5	612		1	650		32.5	27		0	650										637.698	0.1892		537.757	0.09568
		32.55	570		0	651		32.55	25		0	651										637.825	0.26106		537.884	0.10148
		32.6	569		0	652		32.6	29		0	652										637.952	0.16888		538.012	0.11518
		32.65	533		0	653		32.65	29		0	653										638.079	0.16215		538.139	0.0378
		32.7	555		2	654		32.7	19		0	654										638.206	0.27656		538.267	0.10274
		32.75	554		1	655		32.75	29		0	655										638.334	0.15846		538.394	0.0681
		32.8	532		3	656		32.8	13		0	656										638.461	0.37113		538.522	0.10716
		32.85	590		1	657		32.85	29		0	657										638.588	0.17885		538.649	0.07436
		32.9	544		1	658		32.9	30		0	658										638.715	0.24371		538.777	0.11906
		32.95	597		0	659		32.95	23		0	659										638.842	0.26182		538.904	0.05569
		33	604		0	660		33	23		0	660										638.969	0.24063		539.032	0.03229
		33.05	585		1	661		33.05	22		0	661										639.096	0.20898		539.159	0.10039
		33.1	571		3	662		33.1	28		0	662										639.223	0.31066		539.287	0.10589
		33.15	565		1	663		33.15	16		0	663										639.35	0.2468		539.414	0.04709
		33.2	543		0	664		33.2	22		0	664										639.477	0.41319		539.542	0.05977
		33.25	585		0	665		33.25	27		0	665										639.604	0.16697		539.669	0.05549
		33.3	571		0	666		33.3	24		0	666										639.731	0.39453		539.797	0.23966
		33.35	544		0	667		33.35	19		0	667										639.858	0.18703		539.924	0.02783
		33.4	591		1	668		33.4	23		0	668										639.985	0.27557		540.052	0.0793
		33.45	567		1	669		33.45	26		0	669										640.112	0.20137		540.179	0.13218
		33.5	563		0	670		33.5	17		0	670										640.239	0.31792		540.307	0.09509
		33.55	575		0	671		33.55	17		0	671										640.367	0.24622		540.434	0.06099
		33.6	562		0	672		33.6	28		0	672										640.494	0.32875		540.562	0.17513
		33.65	561		0	673		33.65	19		0	673										640.621	0.38635		540.689	0.06804
		33.7	573		0	674		33.7	18		0	674										640.748	0.19779		540.817	0.0185
		33.75	544		1	675		33.75	19		0	675										640.875	0.27972		540.944	0.04306
		33.8	558		0	676		33.8	23		0	676										641.002	0.26615		541.071	0.1106
		33.85	574		0	677		33.85	22		0	677										641.129	0.20293		541.199	0.0988
		33.9	544		0	678		33.9	34		0	678										641.256	0.14253		541.326	0.09733
		33.95	567		0	679		33.95	16		0	679										641.383	0.33872		541.454	0.07141
		34	564		0	680		34	20		0	680										641.51	0.17885		541.581	0.13954
		34.05	551		0	681		34.05	19		0	681										641.637	0.23867		541.709	0.05254
		34.1	578		0	682		34.1	20		0	682										641.764	0.23016		541.836	0.10008
		34.15	594		0	683		34.15	24		0	683										641.891	0.18936		541.964	0.04169
		34.2	571		0	684		34.2	36		0	684										642.018	0.2413		542.091	0.05772
		34.25	591		1	685		34.25	18		0	685										642.145	0.2332		542.218	0.02515
		34.3	543		0	686		34.3	27		0	686										642.272	0.14447		542.346	0.15073
		34.35	559		0	687		34.35	17		0	687										642.399	0.19876		542.473	0.09628
		34.4	592		0	688		34.4	12		0	688										642.526	0.30146		542.601	0.04876
		34.45	561		0	689		34.45	29		0	689										642.653	0.16418		542.728	0.10143
		34.5	580		0	690		34.5	22		0	690										642.78	0.13611		542.855	0.08373
		34.55	531		0	691		34.55	14		0	691										642.907	0.26208		542.983	0.09088
		34.6	548		0	692		34.6	22		0	692										643.034	0.22968		543.11	0.09242
		34.65	452		0	693		34.65	24		0	693										643.161	0.22058		543.238	0.08457
		34.7	203		0	694		34.7	24		0	694										643.288	0.17404		543.365	0.04894
		34.75	532		0	695		34.75	25		0	695										643.415	0.21158		543.492	0.0282
		34.8	545		0	696		34.8	19		0	696										643.541	0.13208		543.62	0.02673
		34.85	540		0	697		34.85	17		0	697										643.668	0.25263		543.747	0.17415
		34.9	538		0	698		34.9	26		0	698										643.795	0.18059		543.875	-0.04719
		34.95	476		0	699		34.95	28		0	699										643.922	0.235		544.002	0.10275
		35	523		0	700		35	23		0	700										644.049	0.31893		544.129	0.16547
		35.05	431		0	701		35.05	15		0	701										644.176	0.15247		544.257	0.08137
		35.1	277		0	702		35.1	22		0	702										644.303	0.24141		544.384	0.09379
		35.15	575		0	703		35.15	32		0	703										644.43	0.19223		544.511	0.05726
		35.2	560		0	704		35.2	19		0	704										644.557	0.09582		544.639	0.03901
		35.25	566		0	705		35.25	21		0	705										644.684	0.23837		544.766	0.08633
		35.3	530		0	706		35.3	22		0	706										644.811	0.19813		544.894	0.06737
		35.35	537		0	707		35.35	20		0	707										644.938	0.23805		545.021	0.00832
		35.4	585		0	708		35.4	18		0	708										645.065	0.09922		545.148	0.11118
		35.45	603		0	709		35.45	24		0	709										645.192	0.17833		545.276	0.0931
		35.5	556		1	710		35.5	25		0	710										645.319	0.17557		545.403	0.07505
		35.55	566		0	711		35.55	23		0	711										645.445	0.10717		545.53	0.03844
		35.6	597		0	712		35.6	39		0	712										645.572	0.15673		545.658	0.03592
		35.65	601		0	713		35.65	15		0	713										645.699	0.15938		545.785	0.1079
		35.7	554		0	714		35.7	18		0	714										645.826	0.2115		545.912	0.10786
		35.75	552		0	715		35.75	19		0	715										645.953	0.11992		546.04	0.00275
		35.8	576		0	716		35.8	17		0	716										646.08	0.13562		546.167	0.10039
		35.85	550		0	717		35.85	21		0	717										646.207	0.11551		546.294	0.02451
		35.9	514		0	718		35.9	13		0	718										646.334	0.19558		546.422	0.02606
		35.95	583		0	719		35.95	18		0	719										646.461	0.22078		546.549	0.00731
		36	530		0	720		36	28		0	720										646.588	0.13296		546.676	0.0944
		36.05	598		0	721		36.05	25		0	721										646.714	0.21467		546.804	0.01821
		36.1	364		0	722		36.1	25		0	722										646.841	0.15735		546.931	0.02912
		36.15	42		0	723		36.15	17		0	723										646.968	0.17634		547.058	0.0326
		36.2	26		0	724		36.2	32		0	724										647.095	0.18079		547.185	0.08894
		36.25	391		0	725		36.25	24		0	725										647.222	0.23047		547.313	0.08134
		36.3	546		0	726		36.3	18		0	726										647.349	0.18646		547.44	0.08262
		36.35	532		1	727		36.35	25		0	727										647.476	0.15504		547.567	0.02561
		36.4	603		0	728		36.4	24		0	728										647.603	0.27678		547.695	0.02823
		36.45	567		0	729		36.45	30		0	729										647.729	0.20686		547.822	0.06035
		36.5	600		0	730		36.5	19		0	730										647.856	0.13471		547.949	0.05653
		36.55	567		0	731		36.55	15		0	731										647.983	0.28501		548.077	0.09707
		36.6	600		0	732		36.6	28		0	732										648.11	0.16599		548.204	0.05042
		36.65	528		0	733		36.65	26		0	733										648.237	0.22039		548.331	0.04179
		36.7	532		0	734		36.7	22		0	734										648.364	0.18275		548.458	0.08084
		36.75	602		0	735		36.75	30		0	735										648.49	0.19992		548.586	0.0618
		36.8	535		0	736		36.8	25		0	736										648.617	0.25484		548.713	0.10841
		36.85	535		0	737		36.85	20		0	737										648.744	0.11782		548.84	0.03673
		36.9	580		0	738		36.9	28		0	738										648.871	0.12776		548.967	0.03899
		36.95	548		0	739		36.95	20		0	739										648.998	0.19023		549.095	0.08286
		37	571		0	740		37	17		0	740										649.125	0.16467		549.222	0.03936
		37.05	538		0	741		37.05	21		0	741										649.251	0.16373		549.349	0.02206
		37.1	546		0	742		37.1	23		0	742										649.378	0.21596		549.476	0.02118
		37.15	590		0	743		37.15	20		0	743										649.505	0.1833		549.604	0.03173
		37.2	559		0	744		37.2	31		0	744										649.632	0.14598		549.731	0.09349
		37.25	568		0	745		37.25	22		0	745										649.759	0.28261		549.858	0.01073
		37.3	576		0	746		37.3	25		0	746										649.885	0.18767		549.985	0.0642
		37.35	537		0	747		37.35	16		0	747										650.012	0.16758		550.113	0.04551
		37.4	223		0	748		37.4	23		0	748										650.139	0.16665		550.24	0.11463
		37.45	520		0	749		37.45	14		0	749										650.266	0.18805		550.367	0.07173
		37.5	570		0	750		37.5	27		0	750										650.393	0.2814		550.494	0.03621
		37.55	522		0	751		37.55	22		0	751										650.519	0.21367		550.621	0.07008
		37.6	581		0	752		37.6	36		0	752										650.646	0.12771		550.749	0.04006
		37.65	555		0	753		37.65	28		0	753										650.773	0.27326		550.876	0.08553
		37.7	574		0	754		37.7	15		0	754										650.9	0.21676		551.003	0.08799
		37.75	588		0	755		37.75	26		0	755										651.026	0.17801		551.13	0.07147
		37.8	563		0	756		37.8	29		0	756										651.153	0.19061		551.258	0.00495
		37.85	559		0	757		37.85	22		0	757										651.28	0.15352		551.385	0.0366
		37.9	577		0	758		37.9	19		0	758										651.407	0.18396		551.512	0.05124
		37.95	537		0	759		37.95	32		0	759										651.533	0.20897		551.639	0.0118
		38	571		0	760		38	33		0	760										651.66	0.16652		551.766	0.06653
		38.05	552		0	761		38.05	20		0	761										651.787	0.16984		551.893	0.04805
		38.1	578		0	762		38.1	27		0	762										651.914	0.1607		552.021	0.04905
		38.15	562		0	763		38.15	19		0	763										652.04	0.18094		552.148	0.06924
		38.2	542		0	764		38.2	15		0	764										652.167	0.09089		552.275	0.02289
		38.25	551		0	765		38.25	19		0	765										652.294	0.20326		552.402	0.15601
		38.3	554		0	766		38.3	28		0	766										652.421	0.15375		552.529	0.00245
		38.35	582		0	767		38.35	20		0	767										652.547	0.16519		552.657	0.01521
		38.4	557		0	768		38.4	16		0	768										652.674	0.07876		552.784	0.01303
		38.45	605		0	769		38.45	25		0	769										652.801	0.20364		552.911	0.12328
		38.5	603		0	770		38.5	24		0	770										652.928	0.18075		553.038	0.03596
		38.55	566		0	771		38.55	28		0	771										653.054	0.10013		553.165	0.06495
		38.6	577		0	772		38.6	28		0	772										653.181	0.08564		553.292	0.01075
		38.65	589		0	773		38.65	24		0	773										653.308	0.18695		553.419	0.02901
		38.7	598		0	774		38.7	19		0	774										653.434	0.06904		553.547	0.09317
		38.75	600		0	775		38.75	25		0	775										653.561	0.10483		553.674	0.03315
		38.8	556		0	776		38.8	19		0	776										653.688	0.15989		553.801	0.08981
		38.85	528		0	777		38.85	18		0	777										653.815	0.14571		553.928	0.03277
		38.9	523		0	778		38.9	13		0	778										653.941	0.11918		554.055	-0.01518
		38.95	545		0	779		38.95	15		0	779										654.068	0.21717		554.182	0.10887
		39	573		0	780		39	28		0	780										654.195	0.10835		554.309	0.0127
		39.05	583		0	781		39.05	16		0	781										654.321	0.20444		554.437	0.03419
		39.1	556		0	782		39.1	15		0	782										654.448	0.13076		554.564	0.01169
		39.15	541		0	783		39.15	11		0	783										654.575	0.10752		554.691	0.00836
		39.2	586		0	784		39.2	25		0	784										654.701	0.1452		554.818	0.01663
		39.25	524		0	785		39.25	19		0	785										654.828	0.16643		554.945	0.04957
		39.3	507		0	786		39.3	24		0	786										654.955	0.1213		555.072	0.01201
		39.35	502		0	787		39.35	24		0	787										655.081	0.10145		555.199	0.08757
		39.4	559		0	788		39.4	11		0	788										655.208	0.09466		555.326	0.01381
		39.45	581		0	789		39.45	15		0	789										655.335	0.19287		555.453	0.00621
		39.5	587		0	790		39.5	26		0	790										655.461	0.21		555.58	0.00587
		39.55	601		0	791		39.55	20		0	791										655.588	0.07752		555.708	0.05934
		39.6	570		0	792		39.6	17		0	792										655.715	0.16684		555.835	-0.02967
		39.65	585		0	793		39.65	20		0	793										655.841	0.12597		555.962	0.0296
		39.7	591		0	794		39.7	18		0	794										655.968	0.12741		556.089	0.1118
		39.75	506		0	795		39.75	23		0	795										656.095	0.16661		556.216	0.06011
		39.8	488		0	796		39.8	25		0	796										656.221	0.22397		556.343	0.08427
		39.85	597		0	797		39.85	14		0	797										656.348	0.10798		556.47	0.02069
		39.9	575		0	798		39.9	21		0	798										656.475	0.17133		556.597	0.01707
		39.95	587		0	799		39.95	24		0	799										656.601	0.12454		556.724	0.00223
		40	572		0	800		40	19		0	800										656.728	0.11727		556.851	0.0861
		40.05	590		0	801		40.05	23		0	801										656.854	0.04441		556.978	-0.03705
		40.1	577		0	802		40.1	23		0	802										656.981	0.14577		557.105	-0.05673
		40.15	541		0	803		40.15	27		0	803										657.108	0.09614		557.232	0.02556
		40.2	425		0	804		40.2	18		0	804										657.234	0.15629		557.359	0.0767
		40.25	32		0	805		40.25	22		0	805										657.361	0.1877		557.487	0.05038
		40.3	30		0	806		40.3	22		0	806										657.487	0.11057		557.614	0.00106
		40.35	33		0	807		40.35	16		0	807										657.614	0.16733		557.741	0.06861
		40.4	524		0	808		40.4	23		0	808										657.741	0.13428		557.868	0.02047
		40.45	552		0	809		40.45	13		0	809										657.867	0.11938		557.995	0.0065
		40.5	484		0	810		40.5	28		0	810										657.994	0.10738		558.122	0.03503
		40.55	551		0	811		40.55	15		0	811										658.12	0.13666		558.249	0.12393
		40.6	542		0	812		40.6	15		0	812										658.247	0.14206		558.376	0.04151
		40.65	400		0	813		40.65	19		0	813										658.374	0.11689		558.503	0.0414
		40.7	27		0	814		40.7	18		0	814										658.5	0.10932		558.63	0.00811
		40.75	23		0	815		40.75	28		0	815										658.627	0.12603		558.757	0.01693
		40.8	89		0	816		40.8	20		0	816										658.753	0.11108		558.884	-0.00117
		40.85	616		0	817		40.85	14		0	817										658.88	0.15587		559.011	0.07455
		40.9	549		0	818		40.9	18		0	818										659.006	0.15484		559.138	-0.01583
		40.95	187		0	819		40.95	25		0	819										659.133	0.1221		559.265	0.01026
		41	163		0	820		41	22		0	820										659.26	0.14619		559.392	0.04153
		41.05	574		0	821		41.05	16		0	821										659.386	0.12181		559.519	0.06248
		41.1	639		0	822		41.1	20		0	822										659.513	0.21229		559.646	0.10023
		41.15	554		0	823		41.15	19		0	823										659.639	0.11616		559.773	0.00278
		41.2	546		0	824		41.2	19		0	824										659.766	0.12899		559.9	0.05331
		41.25	547		0	825		41.25	32		0	825										659.892	0.15533		560.027	-0.00591
		41.3	576		0	826		41.3	22		0	826										660.019	0.14495		560.154	0.01325
		41.35	569		0	827		41.35	27		0	827										660.145	0.09745		560.281	-0.01293
		41.4	605		0	828		41.4	31		0	828										660.272	0.08514		560.408	-0.00712
		41.45	574		0	829		41.45	25		0	829										660.398	0.16398		560.535	0.03022
		41.5	488		0	830		41.5	25		0	830										660.525	-0.01396		560.662	-0.01763
		41.55	490		0	831		41.55	27		0	831										660.652	0.05742		560.789	-0.02154
		41.6	523		0	832		41.6	21		0	832										660.778	0.12941		560.916	0.03431
		41.65	538		0	833		41.65	22		0	833										660.905	0.17464		561.043	0.10867
		41.7	513		0	834		41.7	17		0	834										661.031	0.0507		561.169	0.01743
		41.75	486		0	835		41.75	21		0	835										661.158	0.05233		561.296	0.03608
		41.8	518		0	836		41.8	21		0	836										661.284	0.01241		561.423	-0.00333
		41.85	550		0	837		41.85	19		0	837										661.411	0.06837		561.55	0.01585
		41.9	457		0	838		41.9	22		0	838										661.537	0.07191		561.677	0.02215
		41.95	601		0	839		41.95	21		0	839										661.664	0.09111		561.804	0.06915
		42	494		0	840		42	24		0	840										661.79	0.06263		561.931	0.01947
		42.05	557		0	841		42.05	28		0	841										661.917	0.1357		562.058	0.08564
		42.1	395		0	842		42.1	24		0	842										662.043	0.05686		562.185	0.00621
		42.15	68		0	843		42.15	26		0	843										662.17	0.09123		562.312	0.0453
		42.2	52		0	844		42.2	23		0	844										662.296	0.10561		562.439	0.06123
		42.25	64		0	845		42.25	17		0	845										662.423	0.12541		562.566	0.05025
		42.3	94		0	846		42.3	25		0	846										662.549	0.12518		562.693	0.04726
		42.35	146		0	847		42.35	25		0	847										662.675	0.04912		562.82	0.03443
		42.4	552		0	848		42.4	26		0	848										662.802	0.12557		562.946	-0.0172
		42.45	312		0	849		42.45	17		0	849										662.928	0.08489		563.073	0.01103
		42.5	287		0	850		42.5	18		0	850										663.055	0.05981		563.2	0.07171
		42.55	284		0	851		42.55	23		0	851										663.181	0.14659		563.327	0.04709
		42.6	93		0	852		42.6	22		0	852										663.308	0.05348		563.454	0.01805
		42.65	222		0	853		42.65	25		0	853										663.434	0.07814		563.581	0.00702
		42.7	295		0	854		42.7	22		0	854										663.561	0.04784		563.708	0.0923
		42.75	333		0	855		42.75	17		0	855										663.687	0.08502		563.835	0.02813
		42.8	36		0	856		42.8	19		0	856										663.814	0.04889		563.962	0.02757
		42.85	239		0	857		42.85	14		0	857										663.94	0.19876		564.089	0.05552
		42.9	399		0	858		42.9	12		0	858										664.066	0.08669		564.215	-0.02205
		42.95	458		0	859		42.95	23		0	859										664.193	0.10375		564.342	0.07053
		43	429		0	860		43	22		0	860										664.319	0.10966		564.469	-0.02832
		43.05	548		0	861		43.05	30		0	861										664.446	0.09106		564.596	0.00979
		43.1	462		0	862		43.1	24		0	862										664.572	0.10948		564.723	0.08177
		43.15	407		0	863		43.15	28		0	863										664.699	0.08571		564.85	-0.01443
		43.2	427		0	864		43.2	14		0	864										664.825	0.10437		564.977	0.04294
		43.25	365		0	865		43.25	20		0	865										664.951	0.06975		565.103	-0.01407
		43.3	446		0	866		43.3	28		0	866										665.078	0.08201		565.23	-0.01953
		43.35	277		0	867		43.35	23		0	867										665.204	0.0573		565.357	-0.02888
		43.4	211		0	868		43.4	24		0	868										665.331	0.11676		565.484	0.00558
		43.45	426		0	869		43.45	20		0	869										665.457	0.07087		565.611	0.0169
		43.5	495		0	870		43.5	20		0	870										665.583	0.0614		565.738	0.01005
		43.55	410		0	871		43.55	18		0	871										665.71	0.05872		565.865	-0.01545
		43.6	586		0	872		43.6	17		0	872										665.836	0.09627		565.991	-0.01629
		43.65	529		0	873		43.65	31		0	873										665.963	0.06905		566.118	0.01073
		43.7	537		0	874		43.7	20		0	874										666.089	0.06114		566.245	0.03659
		43.75	607		0	875		43.75	18		0	875										666.215	0.06054		566.372	-0.02275
		43.8	494		0	876		43.8	20		0	876										666.342	0.0092		566.499	-0.000597649
		43.85	513		0	877		43.85	24		0	877										666.468	0.11048		566.625	0.03302
		43.9	480		0	878		43.9	24		0	878										666.594	0.08035		566.752	0.0134
		43.95	534		0	879		43.95	20		0	879										666.721	0.08855		566.879	-0.01303
		44	558		0	880		44	21		0	880										666.847	0.03901		567.006	0.01739
		44.05	477		0	881		44.05	24		0	881										666.974	0.07607		567.133	0.00302
		44.1	173		0	882		44.1	29		0	882										667.1	0.08249		567.259	0.0436
		44.15	324		0	883		44.15	23		0	883										667.226	0.0459		567.386	-0.02513
		44.2	408		0	884		44.2	23		0	884										667.353	0.06909		567.513	0.01722
		44.25	338		0	885		44.25	26		0	885										667.479	0.04103		567.64	-0.000728623
		44.3	536		0	886		44.3	21		0	886										667.605	0.06503		567.767	-0.00921
		44.35	512		0	887		44.35	23		0	887										667.732	0.15229		567.893	0.02561
		44.4	468		0	888		44.4	23		0	888										667.858	0.06803		568.02	0.09761
		44.45	484		0	889		44.45	28		0	889										667.984	0.11529		568.147	0.07074
		44.5	473		0	890		44.5	28		0	890										668.111	0.06986		568.274	-0.04119
		44.55	542		0	891		44.55	27		0	891										668.237	0.09558		568.401	0.00655
		44.6	561		0	892		44.6	25		0	892										668.363	0.05923		568.527	0.02507
		44.65	523		0	893		44.65	30		0	893										668.49	0.04334		568.654	0.04138
		44.7	542		0	894		44.7	15		0	894										668.616	0.1157		568.781	0.01625
		44.75	610		0	895		44.75	31		0	895										668.742	0.07438		568.908	-0.00881
		44.8	513		0	896		44.8	29		0	896										668.869	0.10399		569.034	0.02342
		44.85	525		0	897		44.85	24		0	897										668.995	0.02267		569.161	0.02347
		44.9	550		0	898		44.9	18		0	898										669.121	0.04022		569.288	0.01176
		44.95	555		0	899		44.95	22		0	899										669.248	0.10463		569.415	0.08298
		45	526		0	900		45	23		0	900										669.374	0.03654		569.541	0.01727
		45.05	582		0	901		45.05	19		0	901										669.5	0.04193		569.668	-0.00589
		45.1	521		0	902		45.1	10		0	902										669.626	-0.00636		569.795	-0.02835
		45.15	527		0	903		45.15	22		0	903										669.753	0.09102		569.922	0.05388
		45.2	568		0	904		45.2	29		0	904										669.879	0.01939		570.048	-0.00442
		45.25	247		0	905		45.25	15		0	905										670.005	0.05127		570.175	0.02237
		45.3	463		0	906		45.3	31		0	906										670.132	0.08536		570.302	0.06545
		45.35	529		0	907		45.35	23		0	907										670.258	0.11381		570.428	0.00455
		45.4	447		0	908		45.4	23		0	908										670.384	0.05743		570.555	-0.02926
		45.45	520		0	909		45.45	28		0	909										670.51	0.12448		570.682	0.06669
		45.5	493		0	910		45.5	23		0	910										670.637	0.02886		570.809	-0.00257
		45.55	498		0	911		45.55	31		0	911										670.763	0.01938		570.935	0.06541
		45.6	485		0	912		45.6	22		0	912										670.889	0.08962		571.062	-0.0018
		45.65	440		0	913		45.65	24		0	913										671.015	0.05715		571.189	0.04876
		45.7	555		0	914		45.7	30		0	914										671.142	0.02975		571.315	-0.01334
		45.75	190		0	915		45.75	24		0	915										671.268	0.07554		571.442	-0.0108
		45.8	29		0	916		45.8	27		0	916										671.394	0.03731		571.569	-0.00188
		45.85	46		0	917		45.85	21		0	917										671.52	0.07341		571.695	0.00342
		45.9	171		0	918		45.9	19		0	918										671.647	0.03899		571.822	0.04233
		45.95	583		0	919		45.95	14		0	919										671.773	-0.0128		571.949	0.0844
		46	619		0	920		46	30		0	920										671.899	0.06414		572.076	-0.01836
		46.05	583		0	921		46.05	21		0	921										672.025	0.0753		572.202	0.00105
		46.1	566		0	922		46.1	21		0	922										672.152	0.02448		572.329	0.02456
		46.15	580		0	923		46.15	25		0	923										672.278	0.04631		572.456	0.03104
		46.2	586		0	924		46.2	24		0	924										672.404	0.02802		572.582	0.06279
		46.25	565		0	925		46.25	16		0	925										672.53	0.06656		572.709	-0.00524
		46.3	352		0	926		46.3	8		0	926										672.656	0.03084		572.836	0.00649
		46.35	174		0	927		46.35	25		0	927										672.783	0.00764		572.962	-0.00609
		46.4	455		0	928		46.4	30		0	928										672.909	0.03224		573.089	0.04634
		46.45	316		0	929		46.45	20		0	929										673.035	0.04358		573.215	0.00883
		46.5	306		0	930		46.5	23		0	930										673.161	0.00545		573.342	0.00577
		46.55	437		0	931		46.55	31		0	931										673.287	0.05901		573.469	0.01105
		46.6	513		0	932		46.6	30		0	932										673.414	0.02641		573.595	-0.01346
		46.65	488		0	933		46.65	29		0	933										673.54	0.02986		573.722	0.00572
		46.7	499		0	934		46.7	27		0	934										673.666	0.02033		573.849	-0.05555
		46.75	539		0	935		46.75	25		0	935										673.792	0.04159		573.975	0.00559
		46.8	502		0	936		46.8	21		0	936										673.918	0.10348		574.102	0.0102
		46.85	525		0	937		46.85	20		0	937										674.045	0.04451		574.229	0.0246
		46.9	484		0	938		46.9	20		0	938										674.171	0.05623		574.355	0.01551
		46.95	483		0	939		46.95	32		0	939										674.297	0.05637		574.482	0.01054
		47	88		0	940		47	25		0	940										674.423	0.01908		574.608	0.00843
		47.05	441		0	941		47.05	23		0	941										674.549	0.03149		574.735	0.01325
		47.1	429		0	942		47.1	29		0	942										674.675	0.01278		574.862	0.00776
		47.15	174		0	943		47.15	26		0	943										674.802	0.02271		574.988	-0.03166
		47.2	508		0	944		47.2	14		0	944										674.928	0.06558		575.115	0.03004
		47.25	247		0	945		47.25	15		0	945										675.054	0.02435		575.241	-0.00478
		47.3	76		0	946		47.3	27		0	946										675.18	0.10537		575.368	0.02544
		47.35	369		0	947		47.35	22		0	947										675.306	0.01817		575.495	0.04743
		47.4	333		0	948		47.4	26		0	948										675.432	0.05684		575.621	-0.0268
		47.45	371		0	949		47.45	26		0	949										675.558	0.05644		575.748	-0.00512
		47.5	559		0	950		47.5	19		0	950										675.685	0.01234		575.874	0.02228
		47.55	461		0	951		47.55	33		0	951										675.811	0.03555		576.001	0.01269
		47.6	548		0	952		47.6	16		0	952										675.937	0.000781256		576.127	-0.0124
		47.65	600		0	953		47.65	18		0	953										676.063	0.02851		576.254	0.08243
		47.7	591		0	954		47.7	30		0	954										676.189	0.05151		576.381	-0.01358
		47.75	579		0	955		47.75	21		0	955										676.315	-0.000144672		576.507	-0.01719
		47.8	474		0	956		47.8	14		0	956										676.441	0.01873		576.634	0.03511
		47.85	602		0	957		47.85	21		0	957										676.567	0.05248		576.76	0.01312
		47.9	478		0	958		47.9	26		0	958										676.693	0.07407		576.887	0.07074
		47.95	369		0	959		47.95	20		0	959										676.82	0.053		577.013	-0.01254
		48	204		0	960		48	22		0	960										676.946	0.03079		577.14	-0.00625
		48.05	526		0	961		48.05	25		0	961										677.072	0.03958		577.267	0.0708
		48.1	557		0	962		48.1	24		0	962										677.198	0.02808		577.393	0.01017
		48.15	425		0	963		48.15	26		0	963										677.324	0.02938		577.52	0.00845
		48.2	531		0	964		48.2	23		0	964										677.45	0.08584		577.646	-0.00131
		48.25	603		0	965		48.25	28		0	965										677.576	0.03809		577.773	0.01117
		48.3	488		0	966		48.3	40		0	966										677.702	0.0496		577.899	0.02932
		48.35	575		0	967		48.35	28		0	967										677.828	0.01303		578.026	0.01637
		48.4	572		0	968		48.4	19		0	968										677.954	0.00248		578.152	-0.01861
		48.45	568		0	969		48.45	30		0	969										678.08	0.06216		578.279	0.0176
		48.5	568		0	970		48.5	19		0	970										678.206	-0.01476		578.405	0.05768
		48.55	591		0	971		48.55	24		0	971										678.333	-0.00105		578.532	-0.05766
		48.6	558		0	972		48.6	23		0	972										678.459	0.02146		578.658	0.06865
		48.65	646		0	973		48.65	30		0	973										678.585	0.0938		578.785	0.01005
		48.7	603		0	974		48.7	31		0	974										678.711	0.0063		578.911	-0.02458
		48.75	597		0	975		48.75	28		0	975										678.837	0.03742		579.038	0.0236
		48.8	552		0	976		48.8	22		0	976										678.963	0.0099		579.164	0.01991
		48.85	573		0	977		48.85	28		0	977										679.089	0.04527		579.291	0.00797
		48.9	584		0	978		48.9	33		0	978										679.215	0.07139		579.417	0.02321
		48.95	562		0	979		48.95	30		0	979										679.341	-0.02151		579.544	-0.02078
		49	543		0	980		49	18		0	980										679.467	0.00932		579.67	-0.01095
		49.05	610		0	981		49.05	23		0	981										679.593	-0.01814		579.797	0.00305
		49.1	572		0	982		49.1	22		0	982										679.719	0.05517		579.923	0.04057
		49.15	489		0	983		49.15	22		0	983										679.845	0.01388		580.05	-0.01668
		49.2	378		0	984		49.2	24		0	984										679.971	-0.00893		580.176	-0.02603
		49.25	305		0	985		49.25	13		0	985										680.097	0.02143		580.303	0.03864
		49.3	36		0	986		49.3	32		0	986										680.223	0.00514		580.429	-0.00925
		49.35	38		0	987		49.35	25		0	987										680.349	0.00628		580.556	-0.03676
		49.4	34		0	988		49.4	26		0	988										680.475	0.03277		580.682	-0.000895202
		49.45	35		0	989		49.45	34		0	989										680.601	-0.02776		580.808	0.00897
		49.5	29		0	990		49.5	30		0	990										680.727	0.06839		580.935	0.03046
		49.55	30		0	991		49.55	18		0	991										680.853	0.05876		581.061	0.006
		49.6	40		0	992		49.6	43		0	992										680.979	0.00841		581.188	0.03847
		49.65	39		0	993		49.65	29		0	993										681.105	0.06164		581.314	0.02156
		49.7	38		0	994		49.7	27		0	994										681.231	0.02661		581.441	0.01654
		49.75	41		0	995		49.75	24		0	995										681.357	0.06627		581.567	0.00709
		49.8	34		0	996		49.8	26		0	996										681.483	0.08549		581.694	0.09767
		49.85	43		0	997		49.85	23		0	997										681.609	0.02064		581.82	0.02464
		49.9	69		0	998		49.9	25		0	998										681.735	0.00988		581.946	-0.00883
		49.95	39		0	999		49.95	25		0	999										681.861	0.04279		582.073	0.03668
		50	42					50	23													681.987	0.03329		582.199	-0.01047
		50.05	20					50.05	22													682.113	0.01406		582.326	-0.00955
		50.1	38					50.1	18													682.239	0.03357		582.452	0.02685
		50.15	20					50.15	20													682.365	-0.00246		582.578	0.03442
		50.2	40					50.2	22													682.491	0.0348		582.705	-0.00654
		50.25	63					50.25	18													682.617	0.07636		582.831	0.07355
		50.3	76					50.3	22													682.743	0.02698		582.958	0.00953
		50.35	83					50.35	19													682.869	0.00542		583.084	0.02175
		50.4	45					50.4	26													682.995	0.043		583.21	0.00132
		50.45	46					50.45	20													683.121	0.08218		583.337	-0.00337
		50.5	40					50.5	22													683.246	0.04281		583.463	0.03217
		50.55	37					50.55	19													683.372	0.05573		583.59	0.01337
		50.6	52					50.6	29													683.498	0.05321		583.716	0.01896
		50.65	66					50.65	25													683.624	-0.02421		583.842	0.02827
		50.7	56					50.7	23													683.75	0.03242		583.969	-0.000780758
		50.75	61					50.75	30													683.876	0.01466		584.095	-0.00602
		50.8	57					50.8	37													684.002	0.07612		584.221	0.02681
		50.85	49					50.85	26													684.128	0.01787		584.348	0.04273
		50.9	43					50.9	26													684.254	-0.01297		584.474	0.01128
		50.95	84					50.95	23													684.38	0.06076		584.601	0.01474
		51	50					51	26													684.506	-0.01403		584.727	0.0724
		51.05	40					51.05	22													684.631	0.0201		584.853	-0.03169
		51.1	62					51.1	26													684.757	0.05493		584.98	0.00726
		51.15	63					51.15	22													684.883	0.02843		585.106	0.01492
		51.2	62					51.2	26
		51.25	85					51.25	22
		51.3	65					51.3	31
		51.35	69					51.35	20
		51.4	80					51.4	31
		51.45	56					51.45	12
		51.5	62					51.5	29
		51.55	78					51.55	12
		51.6	68					51.6	27
		51.65	45					51.65	27
		51.7	38					51.7	30
		51.75	100					51.75	29
		51.8	160					51.8	18
		51.85	120					51.85	14
		51.9	45					51.9	25
		51.95	39					51.95	27
		52	45					52	25
		52.05	79					52.05	19
		52.1	38					52.1	25
		52.15	91					52.15	17
		52.2	54					52.2	19
		52.25	92					52.25	24
		52.3	46					52.3	33
		52.35	30					52.35	27
		52.4	45					52.4	23
		52.45	35					52.45	27
		52.5	39					52.5	29
		52.55	101					52.55	35
		52.6	41					52.6	22
		52.65	51					52.65	30
		52.7	40					52.7	25
		52.75	46					52.75	27
		52.8	71					52.8	34
		52.85	58					52.85	30
		52.9	70					52.9	27
		52.95	52					52.95	41
		53	47					53	25
		53.05	76					53.05	48
		53.1	84					53.1	25
		53.15	86					53.15	31
		53.2	104					53.2	31
		53.25	24					53.25	24
		53.3	22					53.3	22
		53.35	150					53.35	32
		53.4	163					53.4	22
		53.45	151					53.45	42
		53.5	119					53.5	28
		53.55	170					53.55	37
		53.6	233					53.6	26
		53.65	257					53.65	35
		53.7	227					53.7	34
		53.75	249					53.75	34
		53.8	213					53.8	32
		53.85	187					53.85	32
		53.9	177					53.9	28
		53.95	274					53.95	25
		54	261					54	27
		54.05	234					54.05	35
		54.1	136					54.1	36
		54.15	31					54.15	34
		54.2	203					54.2	22
		54.25	59					54.25	25
		54.3	479					54.3	26
		54.35	89					54.35	34
		54.4	29					54.4	23
		54.45	25					54.45	32
		54.5	32					54.5	21
		54.55	24					54.55	26
		54.6	151					54.6	16
		54.65	489					54.65	22
		54.7	505					54.7	33
		54.75	504					54.75	23
		54.8	466					54.8	28
		54.85	512					54.85	34
		54.9	479					54.9	26
		54.95	511					54.95	29
		55	516					55	22
		55.05	505					55.05	27
		55.1	451					55.1	21
		55.15	426					55.15	23
		55.2	435					55.2	19
		55.25	492					55.25	23
		55.3	535					55.3	30
		55.35	467					55.35	24
		55.4	513					55.4	11
		55.45	456					55.45	17
		55.5	462					55.5	22
		55.55	492					55.55	20
		55.6	483					55.6	27
		55.65	405					55.65	31
		55.7	472					55.7	22
		55.75	464					55.75	23
		55.8	472					55.8	21
		55.85	505					55.85	18
		55.9	524					55.9	25
		55.95	537					55.95	17
		56	490					56	31
		56.05	465					56.05	21
		56.1	494					56.1	23
		56.15	514					56.15	25
		56.2	484					56.2	13
		56.25	507					56.25	29
		56.3	532					56.3	27
		56.35	459					56.35	28
		56.4	492					56.4	23
		56.45	428					56.45	23
		56.5	447					56.5	24
		56.55	521					56.55	16
		56.6	575					56.6	22
		56.65	567					56.65	19
		56.7	534					56.7	29
		56.75	530					56.75	29
		56.8	523					56.8	28
		56.85	542					56.85	28
		56.9	521					56.9	23
		56.95	473					56.95	30
		57	440					57	16
		57.05	33					57.05	19
		57.1	35					57.1	27
		57.15	39					57.15	21
		57.2	390					57.2	25
		57.25	563					57.25	25
		57.3	488					57.3	26
		57.35	512					57.35	24
		57.4	529					57.4	24
		57.45	543					57.45	23
		57.5	495					57.5	27
		57.55	533					57.55	22
		57.6	525					57.6	23
		57.65	476					57.65	25
		57.7	504					57.7	30
		57.75	533					57.75	26
		57.8	493					57.8	27
		57.85	538					57.85	26
		57.9	546					57.9	22
		57.95	539					57.95	31
		58	334					58	27
		58.05	367					58.05	22
		58.1	428					58.1	26
		58.15	402					58.15	30
		58.2	387					58.2	28
		58.25	420					58.25	27
		58.3	412					58.3	21
		58.35	381					58.35	17
		58.4	514					58.4	19
		58.45	487					58.45	12
		58.5	44					58.5	19
		58.55	431					58.55	23
		58.6	521					58.6	18
		58.65	518					58.65	23
		58.7	561					58.7	21
		58.75	521					58.75	30
		58.8	548					58.8	24
		58.85	584					58.85	31
		58.9	539					58.9	25
		58.95	525					58.95	24
		59	501					59	19
		59.05	518					59.05	27
		59.1	540					59.1	20
		59.15	531					59.15	20
		59.2	527					59.2	21
		59.25	371					59.25	20
		59.3	224					59.3	32
		59.35	38					59.35	22
		59.4	471					59.4	23
		59.45	220					59.45	21
		59.5	22					59.5	20
		59.55	28					59.55	20
		59.6	21					59.6	19
		59.65	32					59.65	14
		59.7	29					59.7	29
		59.75	27					59.75	31
		59.8	39					59.8	17
		59.85	22					59.85	21
		59.9	18					59.9	32
		59.95	23					59.95	25
		60	27					60	22
		60.05	23					60.05	24
		60.1	31					60.1	20
		60.15	29					60.15	24
		60.2	25					60.2	22
		60.25	20					60.25	30
		60.3	16					60.3	26
		60.35	26					60.35	24
		60.4	21					60.4	31
		60.45	20					60.45	22
		60.5	26					60.5	21
		60.55	24					60.55	21
		60.6	20					60.6	28
		60.65	31					60.65	24
		60.7	26					60.7	25
		60.75	16					60.75	26
		60.8	27					60.8	23
		60.85	29					60.85	29
		60.9	17					60.9	25
		60.95	31					60.95	23
		61	20					61	20
		61.05	24					61.05	21
		61.1	131					61.1	23
		61.15	88					61.15	31
		61.2	128					61.2	28
		61.25	235					61.25	21
		61.3	221					61.3	22
		61.35	178					61.35	33
		61.4	478					61.4	25
		61.45	327					61.45	30
		61.5	388					61.5	17
		61.55	379					61.55	29
		61.6	563					61.6	27
		61.65	619					61.65	25
		61.7	578					61.7	19
		61.75	538					61.75	25
		61.8	560					61.8	24
		61.85	579					61.85	23
		61.9	574					61.9	19
		61.95	552					61.95	24
		62	555					62	19
		62.05	598					62.05	22
		62.1	605					62.1	26
		62.15	580					62.15	30
		62.2	594					62.2	19
		62.25	582					62.25	25
		62.3	566					62.3	19
		62.35	558					62.35	24
		62.4	396					62.4	25
		62.45	426					62.45	18
		62.5	355					62.5	19
		62.55	541					62.55	28
		62.6	204					62.6	31
		62.65	98					62.65	25
		62.7	532					62.7	28
		62.75	538					62.75	23
		62.8	582					62.8	29
		62.85	560					62.85	17
		62.9	438					62.9	24
		62.95	569					62.95	24
		63	556					63	24
		63.05	578					63.05	27
		63.1	626					63.1	20
		63.15	613					63.15	23
		63.2	597					63.2	19
		63.25	569					63.25	24
		63.3	535					63.3	27
		63.35	557					63.35	18
		63.4	563					63.4	30
		63.45	560					63.45	21
		63.5	537					63.5	14
		63.55	568					63.55	26
		63.6	578					63.6	26
		63.65	543					63.65	23
		63.7	479					63.7	23
		63.75	521					63.75	20
		63.8	510					63.8	23
		63.85	494					63.85	25
		63.9	504					63.9	20
		63.95	514					63.95	22
		64	537					64	16
		64.05	512					64.05	32
		64.1	497					64.1	19
		64.15	489					64.15	31
		64.2	487					64.2	18
		64.25	556					64.25	23
		64.3	498					64.3	20
		64.35	511					64.35	27
		64.4	480					64.4	30
		64.45	500					64.45	23
		64.5	495					64.5	22
		64.55	579					64.55	23
		64.6	496					64.6	31
		64.65	570					64.65	35
		64.7	486					64.7	16
		64.75	549					64.75	33
		64.8	505					64.8	25
		64.85	508					64.85	28
		64.9	516					64.9	18
		64.95	503					64.95	23
		65	541					65	26
		65.05	496					65.05	19
		65.1	513					65.1	25
		65.15	495					65.15	22
		65.2	507					65.2	21
		65.25	523					65.25	23
		65.3	516					65.3	14
		65.35	527					65.35	22
		65.4	538					65.4	35
		65.45	340					65.45	27
		65.5	544					65.5	29
		65.55	531					65.55	27
		65.6	602					65.6	35
		65.65	544					65.65	20
		65.7	555					65.7	28
		65.75	611					65.75	34
		65.8	586					65.8	28
		65.85	669					65.85	29
		65.9	630					65.9	33
		65.95	605					65.95	35
		66	602					66	22
		66.05	662					66.05	32
		66.1	668					66.1	28
		66.15	607					66.15	34
		66.2	630					66.2	24
		66.25	727					66.25	16
		66.3	626					66.3	20
		66.35	628					66.35	25
		66.4	657					66.4	17
		66.45	636					66.45	19
		66.5	528					66.5	25
		66.55	629					66.55	27
		66.6	647					66.6	17
		66.65	654					66.65	23
		66.7	536					66.7	26
		66.75	662					66.75	31
		66.8	296					66.8	24
		66.85	358					66.85	22
		66.9	47					66.9	28
		66.95	59					66.95	21
		67	54					67	24
		67.05	48					67.05	24
		67.1	36					67.1	27
		67.15	33					67.15	21
		67.2	22					67.2	24
		67.25	22					67.25	20
		67.3	20					67.3	26
		67.35	33					67.35	19
		67.4	17					67.4	22
		67.45	25					67.45	26
		67.5	18					67.5	12
		67.55	23					67.55	25
		67.6	23					67.6	27
		67.65	28					67.65	30
		67.7	26					67.7	29
		67.75	22					67.75	19
		67.8	33					67.8	30
		67.85	25					67.85	24
		67.9	18					67.9	29
		67.95	17					67.95	20
		68	17					68	20
		68.05	23					68.05	21
		68.1	22					68.1	21
		68.15	30					68.15	25
		68.2	17					68.2	27
		68.25	18					68.25	23
		68.3	24					68.3	20
		68.35	19					68.35	28
		68.4	30					68.4	29
		68.45	23					68.45	26
		68.5	25					68.5	17
		68.55	22					68.55	28
		68.6	22					68.6	16
		68.65	17					68.65	19
		68.7	18					68.7	24
		68.75	28					68.75	29
		68.8	15					68.8	16
		68.85	18					68.85	29
		68.9	18					68.9	22
		68.95	21					68.95	19
		69	9					69	17
		69.05	22					69.05	19
		69.1	21					69.1	20
		69.15	21					69.15	16
		69.2	27					69.2	15
		69.25	18					69.25	20
		69.3	19					69.3	25
		69.35	23					69.35	28
		69.4	24					69.4	31
		69.45	26					69.45	31
		69.5	16					69.5	24
		69.55	24					69.55	27
		69.6	18					69.6	33
		69.65	22					69.65	36
		69.7	19					69.7	16
		69.75	23					69.75	18
		69.8	18					69.8	23
		69.85	23					69.85	23
		69.9	18					69.9	22
		69.95	18					69.95	30
		70	19					70	17
		70.05	16					70.05	26
		70.1	14					70.1	28
		70.15	11					70.15	19
		70.2	20					70.2	34
		70.25	28					70.25	23
		70.3	26					70.3	16
		70.35	17					70.35	32
		70.4	22					70.4	25
		70.45	25					70.45	29
		70.5	27					70.5	24
		70.55	19					70.55	27
		70.6	20					70.6	26
		70.65	19					70.65	21
		70.7	21					70.7	24
		70.75	22					70.75	21
		70.8	22					70.8	21
		70.85	20					70.85	26
		70.9	17					70.9	23
		70.95	27					70.95	21
		71	15					71	23
		71.05	36					71.05	31
		71.1	34					71.1	18
		71.15	26					71.15	27
		71.2	34					71.2	25
		71.25	17					71.25	14
		71.3	17					71.3	23
		71.35	13					71.35	27
		71.4	16					71.4	23
		71.45	17					71.45	27
		71.5	12					71.5	20
		71.55	22					71.55	31
		71.6	24					71.6	31
		71.65	26					71.65	32
		71.7	23					71.7	29
		71.75	24					71.75	26
		71.8	19					71.8	18
		71.85	17					71.85	25
		71.9	18					71.9	30
		71.95	14					71.95	22
		72	20					72	22
		72.05	16					72.05	21
		72.1	15					72.1	23
		72.15	16					72.15	17
		72.2	20					72.2	19
		72.25	27					72.25	26
		72.3	15					72.3	23
		72.35	23					72.35	24
		72.4	48					72.4	23
		72.45	14					72.45	19
		72.5	16					72.5	24
		72.55	12					72.55	17
		72.6	21					72.6	22
		72.65	18					72.65	27
		72.7	268					72.7	19
		72.75	355					72.75	21
		72.8	521					72.8	33
		72.85	502					72.85	25
		72.9	555					72.9	27
		72.95	519					72.95	19
		73	557					73	23
		73.05	516					73.05	21
		73.1	542					73.1	27
		73.15	526					73.15	25
		73.2	539					73.2	17
		73.25	520					73.25	24
		73.3	569					73.3	15
		73.35	536					73.35	17
		73.4	508					73.4	31
		73.45	549					73.45	29
		73.5	539					73.5	21
		73.55	533					73.55	23
		73.6	566					73.6	17
		73.65	523					73.65	19
		73.7	391					73.7	13
		73.75	528					73.75	22
		73.8	506					73.8	23
		73.85	529					73.85	22
		73.9	559					73.9	20
		73.95	158					73.95	19
		74	366					74	23
		74.05	120					74.05	27
		74.1	573					74.1	20
		74.15	569					74.15	24
		74.2	558					74.2	21
		74.25	568					74.25	17
		74.3	558					74.3	30
		74.35	477					74.35	17
		74.4	405					74.4	26
		74.45	516					74.45	24
		74.5	507					74.5	31
		74.55	528					74.55	24
		74.6	535					74.6	34
		74.65	577					74.65	27
		74.7	542					74.7	20
		74.75	560					74.75	24
		74.8	576					74.8	26
		74.85	564					74.85	17
		74.9	531					74.9	20
		74.95	584					74.95	21
		75	571					75	25
		75.05	586					75.05	21
		75.1	588					75.1	25
		75.15	615					75.15	26
		75.2	622					75.2	18
		75.25	624					75.25	28
		75.3	583					75.3	28
		75.35	605					75.35	22
		75.4	592					75.4	22
		75.45	632					75.45	23
		75.5	573					75.5	28
		75.55	568					75.55	18
		75.6	558					75.6	45
		75.65	347					75.65	41
		75.7	153					75.7	27
		75.75	183					75.75	28
		75.8	175					75.8	35
		75.85	557					75.85	19
		75.9	570					75.9	35
		75.95	595					75.95	29
		76	571					76	26
		76.05	586					76.05	93
		76.1	577					76.1	31
		76.15	621					76.15	19
		76.2	663					76.2	22
		76.25	570					76.25	19
		76.3	606					76.3	30
		76.35	596					76.35	32
		76.4	649					76.4	39
		76.45	605					76.45	52
		76.5	600					76.5	41
		76.55	625					76.55	32
		76.6	645					76.6	42
		76.65	675					76.65	34
		76.7	584					76.7	38
		76.75	560					76.75	35
		76.8	576					76.8	42
		76.85	596					76.85	30
		76.9	552					76.9	31
		76.95	523					76.95	35
		77	564					77	33
		77.05	541					77.05	39
		77.1	578					77.1	40
		77.15	496					77.15	19
		77.2	555					77.2	23
		77.25	587					77.25	39
		77.3	509					77.3	26
		77.35	560					77.35	16
		77.4	603					77.4	25
		77.45	540					77.45	25
		77.5	544					77.5	30
		77.55	576					77.55	30
		77.6	538					77.6	35
		77.65	556					77.65	38
		77.7	486					77.7	26
		77.75	536					77.75	41
		77.8	559					77.8	43
		77.85	555					77.85	34
		77.9	588					77.9	37
		77.95	542					77.95	32
		78	589					78	32
		78.05	552					78.05	21
		78.1	507					78.1	23
		78.15	540					78.15	36
		78.2	581					78.2	34
		78.25	579					78.25	30
		78.3	571					78.3	30
		78.35	540					78.35	40
		78.4	510					78.4	35
		78.45	560					78.45	41
		78.5	542					78.5	34
		78.55	550					78.55	32
		78.6	546					78.6	41
		78.65	575					78.65	31
		78.7	559					78.7	43
		78.75	577					78.75	40
		78.8	537					78.8	33
		78.85	563					78.85	38
		78.9	560					78.9	40
		78.95	551					78.95	41
		79	528					79	32
		79.05	534					79.05	32
		79.1	560					79.1	22
		79.15	581					79.15	40
		79.2	626					79.2	30
		79.25	543					79.25	22
		79.3	547					79.3	38
		79.35	578					79.35	29
		79.4	577					79.4	30
		79.45	515					79.45	23
		79.5	565					79.5	34
		79.55	185					79.55	25
		79.6	59					79.6	29
		79.65	588					79.65	31
		79.7	558					79.7	31
		79.75	541					79.75	30
		79.8	566					79.8	23
		79.85	603					79.85	28
		79.9	573					79.9	26
		79.95	544					79.95	22
		80	532					80	28
		80.05	568					80.05	22
		80.1	536					80.1	46
		80.15	586					80.15	34
		80.2	640					80.2	43
		80.25	602					80.25	53
		80.3	547					80.3	28
		80.35	570					80.35	34
		80.4	566					80.4	24
		80.45	555					80.45	42
		80.5	560					80.5	35
		80.55	565					80.55	29
		80.6	555					80.6	18
		80.65	545					80.65	25
		80.7	545					80.7	28
		80.75	549					80.75	32
		80.8	588					80.8	37
		80.85	547					80.85	35
		80.9	259					80.9	35
		80.95	548					80.95	35
		81	567					81	30
		81.05	581					81.05	35
		81.1	556					81.1	24
		81.15	542					81.15	27
		81.2	553					81.2	28
		81.25	567					81.25	36
		81.3	603					81.3	24
		81.35	528					81.35	20
		81.4	558					81.4	29
		81.45	593					81.45	27
		81.5	359					81.5	27
		81.55	563					81.55	29
		81.6	542					81.6	25
		81.65	614					81.65	15
		81.7	620					81.7	29
		81.75	559					81.75	23
		81.8	543					81.8	22
		81.85	599					81.85	22
		81.9	584					81.9	31
		81.95	574					81.95	27
		82	623					82	35
		82.05	585					82.05	32
		82.1	611					82.1	25
		82.15	548					82.15	43
		82.2	568					82.2	31
		82.25	547					82.25	25
		82.3	568					82.3	14
		82.35	581					82.35	23
		82.4	547					82.4	23
		82.45	597					82.45	22
		82.5	568					82.5	27
		82.55	562					82.55	24
		82.6	543					82.6	20
		82.65	616					82.65	38
		82.7	563					82.7	30
		82.75	580					82.75	24
		82.8	579					82.8	22
		82.85	580					82.85	20
		82.9	573					82.9	21
		82.95	553					82.95	25
		83	543					83	34
		83.05	530					83.05	34
		83.1	557					83.1	30
		83.15	591					83.15	31
		83.2	586					83.2	29
		83.25	548					83.25	31
		83.3	569					83.3	36
		83.35	519					83.35	33
		83.4	565					83.4	24
		83.45	553					83.45	32
		83.5	604					83.5	22
		83.55	563					83.55	30
		83.6	572					83.6	26
		83.65	578					83.65	31
		83.7	523					83.7	27
		83.75	553					83.75	23
		83.8	589					83.8	34
		83.85	574					83.85	23
		83.9	520					83.9	20
		83.95	577					83.95	30
		84	550					84	18
		84.05	565					84.05	25
		84.1	560					84.1	25
		84.15	566					84.15	24
		84.2	612					84.2	13
		84.25	561					84.25	34
		84.3	557					84.3	25
		84.35	588					84.35	27
		84.4	566					84.4	28
		84.45	566					84.45	22
		84.5	568					84.5	22
		84.55	555					84.55	27
		84.6	564					84.6	29
		84.65	582					84.65	22
		84.7	555					84.7	22
		84.75	568					84.75	26
		84.8	543					84.8	17
		84.85	586					84.85	25
		84.9	562					84.9	43
		84.95	573					84.95	20
		85	521					85	26
		85.05	586					85.05	26
		85.1	533					85.1	26
		85.15	575					85.15	26
		85.2	553					85.2	19
		85.25	649					85.25	26
		85.3	582					85.3	25
		85.35	578					85.35	27
		85.4	569					85.4	28
		85.45	549					85.45	20
		85.5	591					85.5	22
		85.55	595					85.55	20
		85.6	548					85.6	24
		85.65	563					85.65	34
		85.7	505					85.7	24
		85.75	550					85.75	27
		85.8	588					85.8	29
		85.85	584					85.85	35
		85.9	528					85.9	293
		85.95	576					85.95	486
		86	582					86	427
		86.05	569					86.05	438
		86.1	555					86.1	474
		86.15	545					86.15	478
		86.2	553					86.2	437
		86.25	593					86.25	484
		86.3	532					86.3	433
		86.35	551					86.35	415
		86.4	565					86.4	422
		86.45	544					86.45	416
		86.5	569					86.5	77
		86.55	560					86.55	34
		86.6	589					86.6	31
		86.65	580					86.65	23
		86.7	556					86.7	31
		86.75	615					86.75	27
		86.8	563					86.8	29
		86.85	592					86.85	24
		86.9	555					86.9	23
		86.95	575					86.95	39
		87	580					87	19
		87.05	572					87.05	33
		87.1	530					87.1	27
		87.15	603					87.15	20
		87.2	575					87.2	30
		87.25	595					87.25	27
		87.3	568					87.3	26
		87.35	509					87.35	34
		87.4	597					87.4	152
		87.45	559					87.45	422
		87.5	580					87.5	282
		87.55	547					87.55	273
		87.6	549					87.6	320
		87.65	549					87.65	598
		87.7	541					87.7	539
		87.75	593					87.75	564
		87.8	552					87.8	537
		87.85	513					87.85	493
		87.9	559					87.9	461
		87.95	556					87.95	503
		88	500					88	384
		88.05	567					88.05	456
		88.1	593					88.1	498
		88.15	549					88.15	481
		88.2	548					88.2	493
		88.25	531					88.25	517
		88.3	515					88.3	312
		88.35	595					88.35	517
		88.4	544					88.4	409
		88.45	549					88.45	248
		88.5	581					88.5	297
		88.55	559					88.55	439
		88.6	577					88.6	436
		88.65	550					88.65	340
		88.7	594					88.7	356
		88.75	567					88.75	321
		88.8	566					88.8	254
		88.85	531					88.85	360
		88.9	623					88.9	294
		88.95	581					88.95	321
		89	580					89	309
		89.05	572					89.05	330
		89.1	595					89.1	317
		89.15	581					89.15	361
		89.2	599					89.2	346
		89.25	551					89.25	349
		89.3	592					89.3	453
		89.35	604					89.35	511
		89.4	580					89.4	515
		89.45	609					89.45	466
		89.5	564					89.5	512
		89.55	604					89.55	489
		89.6	561					89.6	378
		89.65	592					89.65	91
		89.7	576					89.7	442
		89.75	578					89.75	439
		89.8	620					89.8	434
		89.85	536					89.85	421
		89.9	250					89.9	450
		89.95	333					89.95	508
		90	78					90	515
		90.05	129					90.05	410
		90.1	63					90.1	419
		90.15	30					90.15	461
		90.2	237					90.2	476
		90.25	580					90.25	450
		90.3	557					90.3	456
		90.35	573					90.35	424
		90.4	581					90.4	465
		90.45	533					90.45	409
		90.5	556					90.5	471
		90.55	598					90.55	454
		90.6	553					90.6	458
		90.65	596					90.65	420
		90.7	601					90.7	445
		90.75	565					90.75	488
		90.8	585					90.8	531
		90.85	622					90.85	451
		90.9	551					90.9	391
		90.95	560					90.95	437
		91	638					91	411
		91.05	591					91.05	446
		91.1	622					91.1	450
		91.15	541					91.15	504
		91.2	582					91.2	452
		91.25	586					91.25	476
		91.3	562					91.3	481
		91.35	563					91.35	444
		91.4	537					91.4	446
		91.45	585					91.45	432
		91.5	656					91.5	437
		91.55	547					91.55	342
		91.6	577					91.6	436
		91.65	592					91.65	454
		91.7	599					91.7	489
		91.75	565					91.75	336
		91.8	578					91.8	273
		91.85	595					91.85	452
		91.9	598					91.9	222
		91.95	566					91.95	31
		92	596					92	42
		92.05	452					92.05	24
		92.1	387					92.1	41
		92.15	429					92.15	58
		92.2	574					92.2	55
		92.25	567					92.25	59
		92.3	566					92.3	47
		92.35	564					92.35	44
		92.4	377					92.4	29
		92.45	172					92.45	33
		92.5	304					92.5	34
		92.55	229					92.55	38
		92.6	592					92.6	43
		92.65	561					92.65	37
		92.7	580					92.7	27
		92.75	568					92.75	23
		92.8	585					92.8	44
		92.85	613					92.85	34
		92.9	534					92.9	39
		92.95	661					92.95	33
		93	595					93	31
		93.05	602					93.05	43
		93.1	596					93.1	29
		93.15	580					93.15	28
		93.2	574					93.2	35
		93.25	618					93.25	24
		93.3	625					93.3	28
		93.35	608					93.35	28
		93.4	618					93.4	28
		93.45	598					93.45	37
		93.5	560					93.5	181
		93.55	545					93.55	413
		93.6	585					93.6	363
		93.65	569					93.65	44
		93.7	610					93.7	353
		93.75	629					93.75	399
		93.8	642					93.8	362
		93.85	634					93.85	361
		93.9	565					93.9	416
		93.95	579					93.95	381
		94	610					94	405
		94.05	584					94.05	411
		94.1	562					94.1	407
		94.15	465					94.15	374
		94.2	81					94.2	328
		94.25	51					94.25	385
		94.3	32					94.3	391
		94.35	144					94.35	347
		94.4	380					94.4	243
		94.45	557					94.45	253
		94.5	581					94.5	356
		94.55	526					94.55	174
		94.6	567					94.6	95
		94.65	559					94.65	99
		94.7	560					94.7	26
		94.75	589					94.75	39
		94.8	273					94.8	27
		94.85	35					94.85	168
		94.9	30					94.9	340
		94.95	31					94.95	388
		95	59					95	326
		95.05	28					95.05	271
		95.1	19					95.1	398
		95.15	25					95.15	386
		95.2	29					95.2	302
		95.25	31					95.25	274
		95.3	26					95.3	316
		95.35	30					95.35	272
		95.4	26					95.4	329
		95.45	31					95.45	358
		95.5	20					95.5	329
		95.55	23					95.55	332
		95.6	21					95.6	318
		95.65	22					95.65	333
		95.7	45					95.7	327
		95.75	260					95.75	62
		95.8	438					95.8	38
		95.85	303					95.85	43
		95.9	435					95.9	30
		95.95	415					95.95	32
		96	497					96	54
		96.05	477					96.05	351
		96.1	469					96.1	345
		96.15	472					96.15	317
		96.2	471					96.2	316
		96.25	401					96.25	269
		96.3	305					96.3	293
		96.35	286					96.35	354
		96.4	567					96.4	319
		96.45	544					96.45	296
		96.5	589					96.5	314
		96.55	563					96.55	338
		96.6	578					96.6	292
		96.65	601					96.65	56
		96.7	541					96.7	43
		96.75	537					96.75	35
		96.8	527					96.8	51
		96.85	554					96.85	39
		96.9	626					96.9	29
		96.95	574					96.95	38
		97	545					97	27
		97.05	592					97.05	86
		97.1	607					97.1	32
		97.15	585					97.15	38
		97.2	601					97.2	35
		97.25	570					97.25	34
		97.3	582					97.3	31
		97.35	607					97.35	42
		97.4	573					97.4	41
		97.45	606					97.45	44
		97.5	576					97.5	326
		97.55	553					97.55	163
		97.6	574					97.6	49
		97.65	561					97.65	44
		97.7	527					97.7	45
		97.75	601					97.75	42
		97.8	610					97.8	32
		97.85	570					97.85	32
		97.9	595					97.9	49
		97.95	597					97.95	48
		98	594					98	52
		98.05	512					98.05	51
		98.1	589					98.1	41
		98.15	576					98.15	48
		98.2	568					98.2	47
		98.25	594					98.25	46
		98.3	574					98.3	96
		98.35	290					98.35	45
		98.4	268					98.4	54
		98.45	263					98.45	35
		98.5	257					98.5	43
		98.55	276					98.55	43
		98.6	576					98.6	38
		98.65	633					98.65	41
		98.7	573					98.7	47
		98.75	596					98.75	129
		98.8	558					98.8	42
		98.85	562					98.85	53
		98.9	556					98.9	52
		98.95	569					98.95	52
		99	570					99	49
		99.05	583					99.05	53
		99.1	555					99.1	131
		99.15	620					99.15	90
		99.2	601					99.2	122
		99.25	591					99.25	92
		99.3	576					99.3	123
		99.35	561					99.35	196
		99.4	576					99.4	322
		99.45	533					99.45	344
		99.5	573					99.5	353
		99.55	567					99.55	315
		99.6	638					99.6	333
		99.65	566					99.65	133
		99.7	298					99.7	130
		99.75	525					99.75	122
		99.8	535					99.8	117
[truncated: 2,002 more rows]

## Sheet: Fig. 4
	Fig. 4a						Fig. 4a inset																			Fig. 4b														Fig. 4c
		Mass extiction coefficient					InP-ZnSeS			ZnSeTe-ZnSeS			AIGS-AGS			Fitting data	InP-ZnSeS			ZnSeTe-ZnSeS			AIGS-AGS			experimental data							fitting data							FWHM
	Wavelength (nm)	InP-ZnSeS	ZnSeTe-ZnSeS	AIGS-AGS			Fluence	PL Intensity		Fluence	PL Intensity		Fluence	PL Intensity			X	Y		X	Y		X	Y		AIGS-AGS X	AIGS-AGS Y	InP-ZnSeS X	InP-ZnSeS Y	ZnSeTe-ZnSeS X	ZnSeTe-ZnSeS Y		AIGS-AGS X	AIGS-AGS Y	InP-ZnSeS X	InP-ZnSeS Y	ZnSeTe-ZnSeS X	ZnSeTe-ZnSeS Y		AIGS-AGS	InP-ZnSeS	ZnSeTe-ZnSeS		Box plot	0 point	1/4 point	1/2 point	3/4 point	1 point
	350	3.07826	3.59147	4.01879			647349000000	0.00152		647349000000	0.00399		924784000000	0.00633			647349000000	0.00102		647349000000	0.00407		647349000000	0.0046		-42.372	0.000235676	-67.419	1.15014e-05	-68.125	9.2902e-05		-42.372	-1.7162e-05	-67.419	-0.000102303	-68.125	-4.80439e-05		13.113	16.7778	23.9352		AIGS-AGS	13.113	14.6953	16.0765	17.2925	19.5137
	351	3.05338	3.54163	3.98775			1294700000000	0.00315		1294700000000	0.00733		1849570000000	0.01158			1294700000000	0.00204		1294700000000	0.00812		1294700000000	0.00918		-42.243	-0.000167772	-67.29	-3.65305e-05	-67.9955	-6.49989e-05		-42.2264	-1.57364e-05	-67.2735	-0.000101758	-67.9793	-4.73006e-05		13.1223	16.854	24.4776		InP-ZnSeS	16.7778	18.3294	19.7046	20.9108	22.5074
	352	3.01051	3.49889	3.93066			2589390000000	0.00671		2589390000000	0.01501		3699130000000	0.02466			1924180000000	0.00304		1924180000000	0.01205		1924180000000	0.01362		-42.113	-2.93952e-05	-67.161	-2.30895e-06	-67.866	-8.1151e-05		-42.0808	-1.42966e-05	-67.1279	-0.00010121	-67.8336	-4.65529e-05		13.3842	16.951	25.1518		ZnSeTe-ZnSeS	23.9352	26.2757	27.8561	29.4488	30.4477
	353	2.98286	3.44764	3.90779			5086310000000	0.01274		5178790000000	0.03042		7398270000000	0.04451			2589390000000	0.00408		2589390000000	0.01618		2589390000000	0.01829		-41.984	-0.000195532	-67.031	7.72898e-05	-67.7365	0.000136903		-41.9353	-1.28425e-05	-66.9824	-0.000100658	-67.688	-4.58007e-05		13.4933	17.1792	25.3672
	354	2.95394	3.41267	3.85525			10172600000000	0.02829		10357600000000	0.05686		14796500000000	0.1083			3201010000000	0.00505		3201010000000	0.01996		3201010000000	0.02256		-41.854	0.000144569	-66.902	-5.07665e-05	-67.607	-8.40353e-05		-41.7897	-1.13739e-05	-66.8369	-0.000100103	-67.5423	-4.50439e-05		13.5283	17.2445	25.4149
	355	2.93059	3.37154	3.80846			20345200000000	0.05705		20715200000000	0.11518		29593100000000	0.19697			4477840000000	0.00705		4477840000000	0.02781		4477840000000	0.03141		-41.725	0.000349284	-66.772	2.74571e-05	-67.4775	1.86569e-07		-41.6441	-9.89066e-06	-66.6913	-9.95448e-05	-67.3966	-4.42826e-05		13.5963	17.3854	25.4507
	356	2.90491	3.31127	3.76728			40690500000000	0.12474		41430300000000	0.24377		59186200000000	0.35808			5086310000000	0.00801		5086310000000	0.03153		5086310000000	0.0356		-41.595	-0.00102	-66.643	1.86351e-05	-67.348	-3.67326e-05		-41.4985	-8.3925e-06	-66.5458	-9.89827e-05	-67.2509	-4.35167e-05		14.0503	17.4112	26.234
	357	2.86183	3.26024	3.74245			81381000000000	0.21772		82860600000000	0.43223		118372000000000	0.68405			5754670000000	0.00906		5754670000000	0.0356		5754670000000	0.04018		-41.466	0.000612509	-66.514	5.07368e-05	-67.2185	-9.3842e-05		-41.3529	-6.87927e-06	-66.4002	-9.8417e-05	-67.1053	-4.27462e-05		14.0557	17.4694	26.2757
	358	2.826	3.2276	3.69157			164612000000000	0.24544		165721000000000	0.61481		166461000000000	0.70555			7031500000000	0.01105		7031500000000	0.04333		7031500000000	0.04888		-41.337	-0.000450252	-66.384	-4.40217e-05	-67.089	-1.94267e-05		-41.2073	-5.35074e-06	-66.2547	-9.78477e-05	-66.9596	-4.1971e-05		14.1016	17.5684	26.2815
	359	2.80106	3.19488	3.66477			329223000000000	0.41744		331442000000000	0.88655		331442000000000	0.94541			8308330000000	0.01305		8308330000000	0.05099		8308330000000	0.05749		-41.207	0.000964761	-66.255	4.24753e-06	-66.9595	-0.000124993		-41.0618	-3.80674e-06	-66.1092	-9.72748e-05	-66.8139	-4.11911e-05		14.1109	17.5818	26.9061
	360	2.77762	3.14073	3.62374			658446000000000	0.5579		662885000000000	0.95712		662885000000000	0.98903			9585170000000	0.01504		9585170000000	0.0586		9585170000000	0.06603		-41.078	-0.000646655	-66.125	2.76206e-05	-66.8301	4.34512e-05		-40.9162	-2.24704e-06	-65.9637	-9.66983e-05	-66.6682	-4.04065e-05		14.1594	17.6779	27.2962
	361	2.75138	3.08546	3.59587			1276200000000000	0.90437		994327000000000	0.98054		994327000000000	1.0011			10172600000000	0.01595		10172600000000	0.06207		10172600000000	0.06993		-40.948	0.000131648	-65.996	-2.23823e-05	-66.7006	-2.6926e-05		-40.7706	-6.71428e-07	-65.8181	-9.61181e-05	-66.5226	-3.96171e-05		14.1675	17.7599	27.3218
	362	2.70886	3.04576	3.56967													10862000000000	0.01702		10862000000000	0.06614		10862000000000	0.07449		-40.819	0.000706817	-65.867	3.42989e-05	-66.5711	-8.51891e-05		-40.625	9.203e-07	-65.6726	-9.55341e-05	-66.3769	-3.88229e-05		14.1683	17.7705	27.5257
	363	2.69813	2.98736	3.5291													12138800000000	0.01901		12138800000000	0.07362		12138800000000	0.08288		-40.69	-4.84156e-05	-65.737	9.4093e-07	-66.4416	0.000120174		-40.4794	2.52836e-06	-65.527	-9.49464e-05	-66.2312	-3.80238e-05		14.2286	17.8283	27.7464
	364	2.66119	2.95727	3.48004													13415700000000	0.02098		13415700000000	0.08104		13415700000000	0.09118		-40.56	0.00138	-65.608	6.41801e-06	-66.3122	-2.00036e-05		-40.3339	4.15299e-06	-65.3815	-9.43549e-05	-66.0855	-3.72199e-05		14.2298	17.8958	27.7702
	365	2.61655	2.89917	3.43325													14692500000000	0.02296		14692500000000	0.0884		14692500000000	0.09942		-40.431	-0.00038347	-65.479	-9.08732e-06	-66.1827	-5.00005e-05		-40.1883	5.7944e-06	-65.236	-9.37596e-05	-65.9399	-3.6411e-05		14.2611	18.2782	27.8561
	366	2.58252	2.85569	3.3801													15969300000000	0.02493		15969300000000	0.0957		15969300000000	0.10757		-40.301	-5.66641e-05	-65.349	-1.09925e-05	-66.0532	9.53689e-05		-40.0427	7.45283e-06	-65.0904	-9.31604e-05	-65.7942	-3.55971e-05		14.3634	18.2832	28.1881
	367	2.54719	2.80787	3.36011													17246200000000	0.02689		17246200000000	0.10295		17246200000000	0.11566		-40.172	-0.000245326	-65.22	1.64279e-05	-65.9238	7.22944e-05		-39.8971	9.1285e-06	-64.9449	-9.25574e-05	-65.6485	-3.47782e-05		14.3687	18.3294	28.2501
	368	2.51122	2.7625	3.32635													18523000000000	0.02886		18523000000000	0.11014		18523000000000	0.12367		-40.043	0.000471398	-65.091	-5.56717e-06	-65.7943	0.000102291		-39.7515	1.08217e-05	-64.7994	-9.19505e-05	-65.5028	-3.39543e-05		14.4229	18.3498	28.3134
	369	2.47889	2.72175	3.29152													19799800000000	0.03081		19799800000000	0.11726		19799800000000	0.13161		-39.913	0.000637956	-64.961	-2.21294e-05	-65.6649	5.61422e-05		-39.6059	1.25325e-05	-64.6538	-9.13396e-05	-65.3572	-3.31253e-05		14.444	18.4285	28.4631
	370	2.44267	2.67686	3.25896													20345200000000	0.03165		20345200000000	0.12029		20345200000000	0.13498		-39.784	-0.000188335	-64.832	-5.64336e-05	-65.5354	-0.0001971		-39.4604	1.42614e-05	-64.5083	-9.07247e-05	-65.2115	-3.22911e-05		14.4519	18.4428	28.5316
	371	2.40466	2.63442	3.2196													21076600000000	0.03277		21076600000000	0.12434		21076600000000	0.13947		-39.654	6.56836e-05	-64.702	4.7492e-05	-65.406	0.000114405		-39.3148	1.60085e-05	-64.3628	-9.01058e-05	-65.0658	-3.14518e-05		14.5852	18.7124	28.8009
	372	2.36804	2.59244	3.19068													22353500000000	0.03472		22353500000000	0.13135		22353500000000	0.14727		-39.525	-0.000882212	-64.573	-2.08997e-05	-65.2765	-9.55726e-05		-39.1692	1.7774e-05	-64.2172	-8.94829e-05	-64.9201	-3.06073e-05		14.6427	18.7291	29.4412
	373	2.32566	2.55227	3.14949													23630300000000	0.03667		23630300000000	0.13831		23630300000000	0.15499		-39.396	-0.000990451	-64.444	4.73835e-05	-65.1471	-0.000151528		-39.0236	1.95583e-05	-64.0717	-8.88558e-05	-64.7745	-2.97574e-05		14.644	18.7706	29.4488
	374	2.28515	2.50585	3.1186													24907100000000	0.03861		24907100000000	0.14521		24907100000000	0.16265		-39.266	0.000571478	-64.314	3.97293e-05	-65.0176	5.67191e-05		-38.878	2.13616e-05	-63.9262	-8.82247e-05	-64.6288	-2.89023e-05		14.6629	18.8424	29.6666
	375	2.24358	2.46087	3.09165													26184000000000	0.04055		26184000000000	0.15206		26184000000000	0.17023		-39.137	0.000153799	-64.185	-1.86851e-07	-64.8882	-7.30749e-05		-38.7325	2.31842e-05	-63.7806	-8.75894e-05	-64.4831	-2.80419e-05		14.6953	19.0123	29.7589
	376	2.20145	2.42069	3.0538													27460800000000	0.04248		27460800000000	0.15885		27460800000000	0.17775		-39.007	0.000209715	-64.056	-7.34733e-05	-64.7588	9.4792e-05		-38.5869	2.50263e-05	-63.6351	-8.69499e-05	-64.3374	-2.7176e-05		14.8746	19.1575	29.9267
	377	2.16547	2.37465	3.01624													28737600000000	0.04441		28737600000000	0.16559		28737600000000	0.1852		-38.878	-0.00021537	-63.926	3.72301e-05	-64.6293	-3.21177e-05		-38.4413	2.68882e-05	-63.4896	-8.63061e-05	-64.1918	-2.63047e-05		14.8849	19.2333	30.0258
	378	2.12609	2.33343	2.98309													30014500000000	0.04634		30014500000000	0.17228		30014500000000	0.19258		-38.749	-0.000507261	-63.797	-2.13346e-05	-64.4999	-3.32714e-05		-38.2957	2.87702e-05	-63.344	-8.56581e-05	-64.0461	-2.5428e-05		14.9003	19.2904	30.2325
	379	2.09157	2.29373	2.95234													31291300000000	0.04826		31291300000000	0.17891		31291300000000	0.19989		-38.619	0.000785913	-63.668	-1.26478e-05	-64.3705	-3.78863e-05		-38.1501	3.06725e-05	-63.1985	-8.50058e-05	-63.9004	-2.45457e-05		14.9399	19.3374	30.3725
	380	2.05454	2.25449	2.91903													32568100000000	0.05018		32568100000000	0.18549		32568100000000	0.20714		-38.49	-0.000726845	-63.538	-1.05254e-05	-64.241	-0.000109417		-38.0046	3.25956e-05	-63.053	-8.43492e-05	-63.7547	-2.36578e-05		14.9755	19.4452	30.4477
	381	2.02043	2.21411	2.88118													33845000000000	0.0521		33845000000000	0.19201		33845000000000	0.21432		-38.361	-0.000490746	-63.409	-5.49724e-05	-64.1116	5.15273e-05		-37.859	3.45396e-05	-62.9074	-8.36882e-05	-63.6091	-2.27644e-05		14.9828	19.4986
	382	1.98534	2.17563	2.85196													35121800000000	0.05401		35121800000000	0.19848		35121800000000	0.22144		-38.231	-0.000760182	-63.28	-2.92025e-05	-63.9822	6.1334e-05		-37.7134	3.65049e-05	-62.7619	-8.30227e-05	-63.4634	-2.18652e-05		15.0066	19.5862
	383	1.95383	2.14244	2.82516													36398600000000	0.05591		36398600000000	0.20491		36398600000000	0.22849		-38.102	-0.000246284	-63.15	2.05403e-05	-63.8528	6.19108e-05		-37.5678	3.84918e-05	-62.6163	-8.23528e-05	-63.3177	-2.09604e-05		15.1751	19.5881
	384	1.92125	2.10932	2.79214													37675400000000	0.05782		37675400000000	0.21128		37675400000000	0.23548		-37.973	0.000533904	-63.021	-3.22689e-05	-63.7234	9.13308e-05		-37.4222	4.05005e-05	-62.4708	-8.16784e-05	-63.172	-2.00498e-05		15.2052	19.6203
	385	1.89078	2.07216	2.75822													38952300000000	0.05972		38952300000000	0.21759		38952300000000	0.24241		-37.843	0.000158566	-62.892	-3.30814e-05	-63.5939	0.000160554		-37.2766	4.25315e-05	-62.3253	-8.09995e-05	-63.0264	-1.91334e-05		15.2362	19.7046
	386	1.85983	2.04084	2.73067													40229100000000	0.06161		40229100000000	0.22386		40229100000000	0.24927		-37.714	0.000563253	-62.763	8.0865e-05	-63.4645	-1.25044e-05		-37.1311	4.4585e-05	-62.1797	-8.0316e-05	-62.8807	-1.82111e-05		15.2585	19.7086
	387	1.82985	2.00717	2.69585													40690500000000	0.0623		40690500000000	0.22611		40690500000000	0.25173		-37.585	-0.00107	-62.633	-2.98557e-05	-63.3351	-3.67326e-05		-36.9855	4.66614e-05	-62.0342	-7.96278e-05	-62.735	-1.7283e-05		15.3001	19.7755
	388	1.79979	1.97312	2.66587													41505900000000	0.06351		41505900000000	0.23008		41505900000000	0.25607		-37.455	-4.04009e-05	-62.504	-1.37483e-05	-63.2057	5.21042e-05		-36.8399	4.8761e-05	-61.8887	-7.8935e-05	-62.5894	-1.63489e-05		15.35	19.7768
	389	1.77013	1.94642	2.63512													42782800000000	0.06539		42782800000000	0.23625		42782800000000	0.26281		-37.326	-0.000292503	-62.375	-2.45563e-05	-63.0763	8.8395e-06		-36.6943	5.08841e-05	-61.7431	-7.82375e-05	-62.4437	-1.54088e-05		15.3726	19.9862
	390	1.74242	1.91635	2.60363													44059600000000	0.06728		44059600000000	0.24237		44059600000000	0.26949		-37.197	0.00041672	-62.245	-1.68765e-05	-62.9469	-8.63428e-05		-36.5487	5.30311e-05	-61.5976	-7.75353e-05	-62.298	-1.44626e-05		15.3925	19.9942
	391	1.71608	1.88418	2.57123													45336400000000	0.06916		45336400000000	0.24844		45336400000000	0.27611		-37.067	-0.000195065	-62.116	4.57119e-06	-62.8175	3.99901e-05		-36.4031	5.52023e-05	-61.4521	-7.68283e-05	-62.1523	-1.35103e-05		15.4582	20.041
	392	1.69032	1.85654	2.54186													46613300000000	0.07104		46613300000000	0.25446		46613300000000	0.28266		-36.938	0.00133	-61.987	2.64995e-05	-62.6882	7.28712e-05		-36.2576	5.73982e-05	-61.3065	-7.61164e-05	-62.0067	-1.25519e-05		15.4678	20.1668
	393	1.66326	1.82834	2.50899													47890100000000	0.07291		47890100000000	0.26043		47890100000000	0.28916		-36.809	-0.000329493	-61.857	3.14327e-05	-62.5588	-0.000172295		-36.112	5.9619e-05	-61.161	-7.53997e-05	-61.861	-1.15873e-05		15.5145	20.1896
	394	1.6379	1.80136	2.47855													49166900000000	0.07478		49166900000000	0.26635		49166900000000	0.2956		-36.679	1.74549e-05	-61.728	6.92218e-05	-62.4294	9.94069e-05		-35.9664	6.18652e-05	-61.0155	-7.4678e-05	-61.7153	-1.06164e-05		15.5355	20.1914
	395	1.61358	1.77174	2.44555													50443800000000	0.07664		50443800000000	0.27223		50443800000000	0.30198		-36.55	-5.27618e-05	-61.599	2.05286e-05	-62.3	-8.40353e-05		-35.8208	6.41371e-05	-60.8699	-7.39514e-05	-61.5696	-9.63919e-06		15.5749	20.2985
	396	1.59058	1.74345	2.41194													51720600000000	0.07851		51720600000000	0.27806		51720600000000	0.3083		-36.421	0.000115034	-61.47	-1.62439e-05	-62.1706	1.05701e-05		-35.6752	6.64352e-05	-60.7244	-7.32198e-05	-61.4239	-8.65563e-06		15.6974	20.3126
	397	1.56853	1.71449	2.3809													52997400000000	0.08036		52997400000000	0.28385		52997400000000	0.31457		-36.291	-0.000707892	-61.34	3.31811e-05	-62.0412	0.000125366		-35.5297	6.87597e-05	-60.5789	-7.24831e-05	-61.2783	-7.66564e-06		15.7657	20.3714
	398	1.54528	1.68677	2.34834													54274300000000	0.08222		54274300000000	0.28958		54274300000000	0.32078		-36.162	-0.00060367	-61.211	3.18648e-07	-61.9119	-0.000123839		-35.3841	7.11112e-05	-60.4333	-7.17413e-05	-61.1326	-6.66918e-06		15.777	20.3977
	399	1.5251	1.66045	2.31745													55551100000000	0.08407		55551100000000	0.29527		55551100000000	0.32693		-36.033	-0.00032302	-61.082	7.44553e-05	-61.7825	-9.15345e-05		-35.2385	7.349e-05	-60.2878	-7.09944e-05	-60.9869	-5.66619e-06		15.8725	20.4085
	400	1.50525	1.63309	2.28611													56827900000000	0.08592		56827900000000	0.30092		56827900000000	0.33303		-35.903	-0.000209622	-60.953	6.7108e-05	-61.6531	0.000243046		-35.0929	7.58966e-05	-60.1422	-7.02423e-05	-60.8413	-4.65662e-06		15.9038	20.4948
	401	1.48556	1.60584	2.25477													58104700000000	0.08776		58104700000000	0.30652		58104700000000	0.33907		-35.774	4.39526e-05	-60.823	4.54583e-05	-61.5237	8.15242e-05		-34.9473	7.83314e-05	-59.9967	-6.9485e-05	-60.6956	-3.6404e-06		16.0765	20.6325
	402	1.4653	1.57678	2.22342													59381600000000	0.0896		59381600000000	0.31208		59381600000000	0.34506		-35.645	0.00128	-60.694	2.84681e-05	-61.3944	0.000294963		-34.8017	8.07947e-05	-59.8512	-6.87223e-05	-60.5499	-2.61748e-06		16.0776	20.7151
	403	1.44748	1.55009	2.19117													60658400000000	0.09143		60658400000000	0.31759		60658400000000	0.35099		-35.515	-0.00027874	-60.565	-5.93921e-06	-61.265	-0.000100187		-34.6562	8.32871e-05	-59.7056	-6.79543e-05	-60.4042	-1.58781e-06		16.0975	20.9108
	404	1.42892	1.52302	2.16043													61935200000000	0.09327		61935200000000	0.32305		61935200000000	0.35687		-35.386	0.000487895	-60.435	1.09492e-05	-61.1357	0.000169207		-34.5106	8.58091e-05	-59.5601	-6.7181e-05	-60.2585	-5.51319e-07		16.1091	20.9561
	405	1.40964	1.49548	2.12879													63212100000000	0.09509		63212100000000	0.32848		63212100000000	0.3627		-35.257	-0.000535278	-60.306	-2.99448e-05	-61.0063	0.000206703		-34.365	8.83609e-05	-59.4146	-6.64022e-05	-60.1129	4.92046e-07		16.1416	21.0122
	406	1.39124	1.46841	2.09911													64488900000000	0.09692		64488900000000	0.33386		64488900000000	0.36847		-35.128	0.000515561	-60.177	0.000126048	-60.877	-5.69228e-05		-34.2194	9.09433e-05	-59.269	-6.56179e-05	-59.9672	1.54235e-06		16.1483	21.0624
	407	1.37391	1.44096	2.06928													65765700000000	0.09874		65765700000000	0.33919		65765700000000	0.37419		-34.998	0.000244321	-60.048	4.12508e-05	-60.7476	2.09536e-05		-34.0738	9.35565e-05	-59.1235	-6.4828e-05	-59.8215	2.59964e-06		16.1704	21.1292
	408	1.35616	1.41389	2.03839													67042600000000	0.10056		67042600000000	0.34449		67042600000000	0.37986		-34.869	-0.000411626	-59.918	-1.32127e-05	-60.6183	3.47983e-05		-33.9283	9.62012e-05	-58.978	-6.40326e-05	-59.6759	3.66399e-06		16.1916	21.2426
	409	1.33858	1.38814	2.01008													68319400000000	0.10237		68319400000000	0.34974		68319400000000	0.38548		-34.74	-0.000259627	-59.789	3.03267e-05	-60.4889	5.95519e-06		-33.7827	9.88777e-05	-58.8324	-6.32315e-05	-59.5302	4.73545e-06		16.2348	21.4028
	410	1.32212	1.35984	1.98054													69596200000000	0.10418		69596200000000	0.35495		69596200000000	0.39104		-34.61	0.000595919	-59.66	-4.26875e-05	-60.3596	-1.71193e-05		-33.6371	0.000101587	-58.6869	-6.24248e-05	-59.3845	5.8141e-06		16.2944	21.4607
	411	1.30608	1.33305	1.94996													70873100000000	0.10599		70873100000000	0.36012		70873100000000	0.39656		-34.481	0.000520328	-59.531	-1.35414e-05	-60.2302	0.000101137		-33.4915	0.000104329	-58.5414	-6.16123e-05	-59.2388	6.89998e-06		16.3757	21.468
	412	1.29094	1.30589	1.9218													72149900000000	0.10779		72149900000000	0.36524		72149900000000	0.40203		-34.352	5.13598e-05	-59.401	2.13361e-05	-60.1009	2.03767e-05		-33.3459	0.000107104	-58.3958	-6.0794e-05	-59.0932	7.99317e-06		16.5203	21.572
	413	1.27635	1.27778	1.89378													73426700000000	0.10959		73426700000000	0.37033		73426700000000	0.40744		-34.223	-0.000693353	-59.272	-3.7103e-05	-59.9716	4.92199e-05		-33.2004	0.000109913	-58.2503	-5.99698e-05	-58.9475	9.09373e-06		16.5579	21.7375
	414	1.2629	1.25006	1.86669													74703500000000	0.11138		74703500000000	0.37537		74703500000000	0.41281		-34.093	0.00026465	-59.143	3.51147e-05	-59.8422	-3.15409e-05		-33.0548	0.000112757	-58.1048	-5.91397e-05	-58.8018	1.02017e-05		16.6566	21.8268
	415	1.24953	1.22137	1.83655													75980400000000	0.11318		75980400000000	0.38038		75980400000000	0.41813		-33.964	-0.000396672	-59.014	-4.33762e-07	-59.7129	1.5185e-05		-32.9092	0.000115636	-57.9592	-5.83036e-05	-58.6561	1.13172e-05		16.7358	21.8801
	416	1.23697	1.19392	1.8096													77257200000000	0.11496		77257200000000	0.38534		77257200000000	0.4234		-33.835	0.000474413	-58.885	9.91197e-05	-59.5836	-2.75028e-05		-32.7636	0.000118551	-57.8137	-5.74616e-05	-58.5105	1.24403e-05		16.7594	22.0929
	417	1.22246	1.16554	1.77916													78534000000000	0.11675		78534000000000	0.39026		78534000000000	0.42862		-33.706	-5.5449e-05	-58.755	6.70613e-05	-59.4543	4.74893e-05		-32.618	0.000121501	-57.6681	-5.66134e-05	-58.3648	1.3571e-05		16.8232	22.1519
	418	1.20983	1.13648	1.75054													79810900000000	0.11853		79810900000000	0.39515		79810900000000	0.4338		-33.576	0.00112	-58.626	-1.93912e-05	-59.3249	3.99901e-05		-32.4724	0.000124489	-57.5226	-5.57591e-05	-58.2191	1.47094e-05		16.8963	22.2072
	419	1.19661	1.10781	1.72359													81087700000000	0.12031		81087700000000	0.39999		81087700000000	0.43893		-33.447	-0.000745697	-58.497	-1.75158e-05	-59.1956	0.000209588		-32.3269	0.000127514	-57.3771	-5.48986e-05	-58.0734	1.58555e-05		16.9288	22.3946
	420	1.1809	1.07867	1.69497													81381000000000	0.12072		81381000000000	0.4011		81381000000000	0.4401		-33.318	0.000657186	-58.368	-3.37667e-06	-59.0663	5.95519e-06		-32.1813	0.000130577	-57.2315	-5.40318e-05	-57.9278	1.70095e-05		16.9401	22.5074
	421	1.16283	1.04886	1.66575													82364500000000	0.12208		82364500000000	0.4048		82364500000000	0.44401		-33.189	-0.000501981	-58.239	5.56383e-06	-58.937	4.17207e-05		-32.0357	0.000133679	-57.086	-5.31587e-05	-57.7821	1.81714e-05		16.9615
	422	1.1416	1.02103	1.63925													83641400000000	0.12385		83641400000000	0.40957		83641400000000	0.44905		-33.059	0.000188686	-58.109	2.94758e-05	-58.8077	8.67159e-05		-31.8901	0.000136821	-56.9405	-5.22792e-05	-57.6364	1.93413e-05		17.062
	423	1.11713	0.99283	1.61139													84918200000000	0.12562		84918200000000	0.4143		84918200000000	0.45404		-32.93	0.00126	-57.98	9.88995e-05	-58.6784	0.000147286		-31.7445	0.000140002	-56.7949	-5.13933e-05	-57.4907	2.05192e-05		17.0738
	424	1.0861	0.96444	1.58414													86195000000000	0.12738		86195000000000	0.41899		86195000000000	0.45898		-32.801	-0.000162608	-57.851	-2.21092e-05	-58.5491	6.30646e-05		-31.5989	0.000143224	-56.6494	-5.05009e-05	-57.3451	2.17053e-05		17.1058
	425	1.0506	0.93728	1.55627													87471900000000	0.12914		87471900000000	0.42365		87471900000000	0.46388		-32.672	0.000446373	-57.722	2.15613e-05	-58.4198	-2.17342e-05		-31.4534	0.000146487	-56.5039	-4.96019e-05	-57.1994	2.28995e-05		17.1967
	426	1.00936	0.91058	1.52918													88748700000000	0.1309		88748700000000	0.42826		88748700000000	0.46874		-32.542	-0.000287409	-57.592	5.3311e-05	-58.2905	-3.38483e-05		-31.3078	0.000149792	-56.3583	-4.86963e-05	-57.0537	2.41021e-05		17.2201
	427	0.96156	0.88464	1.50056													90025500000000	0.13265		90025500000000	0.43284		90025500000000	0.47355		-32.413	0.00129	-57.463	2.62226e-05	-58.1612	-9.49957e-05		-31.1622	0.00015314	-56.2128	-4.7784e-05	-56.908	2.53129e-05		17.2925
	428	0.91019	0.85842	1.47254													91302400000000	0.1344		91302400000000	0.43739		91302400000000	0.47832		-32.284	-6.08e-05	-57.334	-1.82722e-05	-58.0319	3.30677e-05		-31.0166	0.000156532	-56.0673	-4.68649e-05	-56.7624	2.65322e-05		17.3711
	429	0.85647	0.83409	1.44665													92579200000000	0.13614		92579200000000	0.44189		92579200000000	0.48305		-32.155	-0.000856833	-57.205	4.63859e-05	-57.9026	0.000187667		-30.871	0.000159967	-55.9217	-4.5939e-05	-56.6167	2.776e-05		17.3905
	430	0.7991	0.81032	1.42076													93856000000000	0.13789		93856000000000	0.44637		93856000000000	0.48773		-32.025	0.00025736	-57.076	-2.00653e-05	-57.7733	-0.000149221		-30.7255	0.000163448	-55.7762	-4.50062e-05	-56.471	2.89963e-05		17.3946
	431	0.74124	0.78683	1.3935													95132800000000	0.13962		95132800000000	0.4508		95132800000000	0.49237		-31.896	-1.05617e-05	-56.947	-2.58621e-05	-57.644	7.51787e-05		-30.5799	0.000166974	-55.6307	-4.40665e-05	-56.3253	3.02413e-05		17.6669
	432	0.68728	0.76524	1.36882													96409700000000	0.14136		96409700000000	0.4552		96409700000000	0.49697		-31.767	0.000262057	-56.817	-3.06293e-05	-57.5147	-3.84632e-05		-30.4343	0.000170547	-55.4851	-4.31197e-05	-56.1797	3.1495e-05		17.6911
	433	0.63574	0.74458	1.34414													97686500000000	0.14309		97686500000000	0.45957		97686500000000	0.50153		-31.638	0.00018233	-56.688	8.3913e-05	-57.3855	-1.94267e-05		-30.2887	0.000174168	-55.3396	-4.21658e-05	-56.034	3.27576e-05		17.694
	434	0.58826	0.72477	1.32022													98963300000000	0.14482		98963300000000	0.46389		98963300000000	0.50604		-31.509	-0.00103	-56.559	-6.7083e-06	-57.2562	6.82563e-05		-30.1431	0.000177836	-55.1941	-4.12047e-05	-55.8883	3.4029e-05		17.7629
	435	0.54483	0.70562	1.29538													100240000000000	0.14654		100240000000000	0.46819		100240000000000	0.51052		-31.379	0.000115127	-56.43	-1.33032e-05	-57.1269	0.000161708		-29.9976	0.000181553	-55.0485	-4.02364e-05	-55.7426	3.53094e-05		17.8183
	436	0.50545	0.68713	1.27055													101517000000000	0.14826		101517000000000	0.47245		101517000000000	0.51495		-31.25	0.000200299	-56.301	6.57467e-05	-56.9976	-8.40353e-05		-29.852	0.000185321	-54.903	-3.92608e-05	-55.597	3.65988e-05		17.8465
	437	0.47166	0.66865	1.24678													102794000000000	0.14998		102794000000000	0.47668		102794000000000	0.51934		-31.121	2.96756e-06	-56.172	3.41221e-05	-56.8684	3.71058e-05		-29.7064	0.000189139	-54.7574	-3.82778e-05	-55.4513	3.78974e-05		17.9564
	438	0.44371	0.65205	1.22467													104071000000000	0.15169		104071000000000	0.48087		104071000000000	0.5237		-30.992	-4.72006e-06	-56.042	7.50425e-05	-56.7391	5.32579e-05		-29.5608	0.000193008	-54.6119	-3.72873e-05	-55.3056	3.92052e-05		18.0465
	439	0.41915	0.63648	1.20272													105347000000000	0.1534		105347000000000	0.48503		105347000000000	0.52801		-30.863	-0.000566493	-55.913	-3.2557e-05	-56.6098	2.26842e-05		-29.4152	0.000196931	-54.4664	-3.62893e-05	-55.1599	4.05223e-05		18.2322
	440	0.39752	0.62064	1.17985													106624000000000	0.15511		106624000000000	0.48915		106624000000000	0.53229		-30.733	-0.000375128	-55.784	1.20336e-05	-56.4806	-7.31264e-06		-29.2696	0.000200906	-54.3209	-3.52837e-05	-55.0143	4.18488e-05		18.2745
	441	0.37832	0.60649	1.1585													107901000000000	0.15682		107901000000000	0.49325		107901000000000	0.53653		-30.604	-0.000111155	-55.655	-3.35332e-07	-56.3513	2.49916e-05		-29.1241	0.000204937	-54.1753	-3.42704e-05	-54.8686	4.31848e-05		18.4669
	442	0.36138	0.59149	1.137													109178000000000	0.15852		109178000000000	0.49731		109178000000000	0.54072		-30.475	-0.000158566	-55.526	-3.35725e-05	-56.2221	-2.28879e-05		-28.9785	0.000209022	-54.0298	-3.32493e-05	-54.7229	4.45303e-05		18.4732
	443	0.34469	0.57716	1.11565													110455000000000	0.16021		110455000000000	0.50133		110455000000000	0.54488		-30.346	-0.000731153	-55.397	-5.97507e-05	-56.0928	-4.42833e-06		-28.8329	0.000213164	-53.8842	-3.22204e-05	-54.5772	4.58855e-05		18.5487
	444	0.3293	0.56395	1.09384													111732000000000	0.16191		111732000000000	0.50533		111732000000000	0.54901		-30.217	-4.83455e-05	-55.267	4.7557e-05	-55.9636	0.000192282		-28.6873	0.000217363	-53.7387	-3.11836e-05	-54.4316	4.72505e-05		18.6643
	445	0.31398	0.54914	1.07159													113008000000000	0.1636		113008000000000	0.50929		113008000000000	0.55309		-30.087	-0.000608278	-55.138	-7.03696e-06	-55.8343	0.000183052		-28.5417	0.000221621	-53.5932	-3.01388e-05	-54.2859	4.86253e-05		18.7228
	446	0.29923	0.53745	1.05265													114285000000000	0.16528		114285000000000	0.51322		114285000000000	0.55714		-29.958	0.00202	-55.009	3.74003e-05	-55.7051	7.92167e-05		-28.3961	0.000225939	-53.4476	-2.90859e-05	-54.1402	5.001e-05		18.8124
	447	0.28473	0.52462	1.03283													115562000000000	0.16696		115562000000000	0.51712		115562000000000	0.56115		-29.829	-0.000578282	-54.88	-5.1542e-05	-55.5759	-1.0197e-05		-28.2506	0.000230317	-53.3021	-2.80248e-05	-53.9945	5.14047e-05		18.8421
	448	0.26974	0.51264	1.01268													116839000000000	0.16864		116839000000000	0.52099		116839000000000	0.56513		-29.7	0.000201771	-54.751	2.16864e-05	-55.4466	0.000126519		-28.105	0.000234757	-53.1566	-2.69554e-05	-53.8489	5.28095e-05		18.9996
	449	0.25524	0.50198	0.99331													118116000000000	0.17032		118116000000000	0.52483		118116000000000	0.56907		-29.571	-0.000584318	-54.622	3.91504e-05	-55.3174	7.10892e-06		-27.9594	0.000239259	-53.011	-2.58778e-05	-53.7032	5.42246e-05		19.0067
	450	0.24	0.49	0.97422													119393000000000	0.17199		119393000000000	0.52863		119393000000000	0.57297		-29.442	-0.000272595	-54.493	1.12611e-06	-55.1882	0.000154786		-27.8138	0.000243826	-52.8655	-2.47917e-05	-53.5575	5.565e-05		19.1614
	451	0.22607	0.47896	0.9559													120669000000000	0.17366		120669000000000	0.53241		120669000000000	0.57684		-29.312	0.000403635	-54.364	-1.63987e-05	-55.0589	5.37833e-06		-27.6682	0.000248458	-52.72	-2.36971e-05	-53.4119	5.70857e-05		19.4575
	452	0.21229	0.46849	0.93834													121946000000000	0.17533		121946000000000	0.53616		121946000000000	0.58067		-29.183	-0.000447401	-54.234	3.5415e-05	-54.9297	-1.76962e-05		-27.5227	0.000253156	-52.5744	-2.25939e-05	-53.2662	5.8532e-05		19.5137
	453	0.19836	0.45784	0.92048													123223000000000	0.17699		123223000000000	0.53987		123223000000000	0.58447		-29.054	0.000400317	-54.105	9.01324e-05	-54.8005	-3.61558e-05		-27.3771	0.000257923	-52.4289	-2.1482e-05	-53.1205	5.99889e-05
	454	0.18499	0.44822	0.9029													124500000000000	0.17865		124500000000000	0.54356		124500000000000	0.58823		-28.925	-0.000598887	-53.976	-3.08203e-05	-54.6713	0.000157093		-27.2315	0.000262758	-52.2834	-2.03613e-05	-52.9748	6.14565e-05
	455	0.1721	0.43869	0.88761													125777000000000	0.18031		125777000000000	0.54721		125777000000000	0.59196		-28.796	0.00157	-53.847	-5.93754e-06	-54.542	3.1914e-05		-27.0859	0.000267663	-52.1378	-1.92318e-05	-52.8291	6.29348e-05
	456	0.15938	0.42955	0.87202													127054000000000	0.18196		127054000000000	0.55084		127054000000000	0.59566		-28.667	-8.74846e-05	-53.718	-7.46131e-05	-54.4128	1.1147e-05		-26.9403	0.00027264	-51.9923	-1.80933e-05	-52.6835	6.44241e-05
	457	0.14836	0.42086	0.85581													128330000000000	0.18361		128330000000000	0.55444		128330000000000	0.59932		-28.538	0.000973991	-53.589	-3.00879e-05	-54.2836	9.76763e-05		-26.7948	0.00027769	-51.8468	-1.69458e-05	-52.5378	6.59244e-05
	458	0.13774	0.41181	0.84113													129607000000000	0.18526		129607000000000	0.55801		129607000000000	0.60295		-28.408	0.000159197	-53.46	-2.35968e-05	-54.1544	-0.000116916		-26.6492	0.000282814	-51.7012	-1.57891e-05	-52.3921	6.74359e-05
	459	0.12648	0.40322	0.82553													130884000000000	0.1869		130884000000000	0.56155		130884000000000	0.60655		-28.279	0.000431184	-53.331	-2.60801e-05	-54.0252	7.46018e-05		-26.5036	0.000288014	-51.5557	-1.46232e-05	-52.2465	6.89585e-05
	460	0.11652	0.39483	0.81055													132161000000000	0.18854		132161000000000	0.56506		132161000000000	0.61011		-28.15	-0.000475581	-53.202	-2.82561e-05	-53.896	3.13371e-05		-26.358	0.000293292	-51.4102	-1.34479e-05	-52.1008	7.04925e-05
	461	0.10736	0.38597	0.79555													133438000000000	0.19018		133438000000000	0.56855		133438000000000	0.61365		-28.021	0.000876482	-53.072	1.27126e-05	-53.7668	0.00013921		-26.2124	0.000298648	-51.2646	-1.22632e-05	-51.9551	7.20379e-05
	462	0.09837	0.37852	0.78162													134715000000000	0.19181		134715000000000	0.572		134715000000000	0.61715		-27.892	-0.000680597	-52.943	-1.08691e-05	-53.6376	-2.6926e-05		-26.0668	0.000304084	-51.1191	-1.1069e-05	-51.8094	7.35949e-05
	463	0.09108	0.37115	0.76829													135991000000000	0.19344		135991000000000	0.57543		135991000000000	0.62061		-27.763	0.000543484	-52.814	3.36166e-05	-53.5084	8.72928e-05		-25.9213	0.000309603	-50.9735	-9.86513e-06	-51.6638	7.51636e-05
	464	0.08362	0.36351	0.75452													137268000000000	0.19506		137268000000000	0.57883		137268000000000	0.62405		-27.634	-0.000888817	-52.685	-2.77309e-05	-53.3792	4.05669e-05		-25.7757	0.000315204	-50.828	-8.65152e-06	-51.5181	7.6744e-05
	465	0.07714	0.35653	0.74044													138545000000000	0.19669		138545000000000	0.58221		138545000000000	0.62746		-27.504	0.000171207	-52.556	2.55069e-05	-53.25	0.000151901		-25.6301	0.000320891	-50.6825	-7.42806e-06	-51.3724	7.83363e-05
	466	0.0709	0.34927	0.72636													139822000000000	0.19831		139822000000000	0.58556		139822000000000	0.63083		-27.375	-0.000803246	-52.427	6.28672e-05	-53.1208	4.92199e-05		-25.4845	0.000326665	-50.5369	-6.19464e-06	-51.2267	7.99407e-05
	467	0.06514	0.34182	0.71303													141099000000000	0.19992		141099000000000	0.58888		141099000000000	0.63417		-27.246	-0.000174245	-52.298	6.80923e-05	-52.9916	0.000106906		-25.3389	0.000332527	-50.3914	-4.95117e-06	-51.081	8.15571e-05
	468	0.0602	0.33512	0.70001													142376000000000	0.20154		142376000000000	0.59217		142376000000000	0.63749		-27.117	-8.02877e-05	-52.169	-3.50812e-05	-52.8625	-3.96169e-05		-25.1933	0.00033848	-50.2459	-3.69754e-06	-50.9354	8.31858e-05
	469	0.05615	0.32833	0.68653													143652000000000	0.20315		143652000000000	0.59544		143652000000000	0.64077		-26.988	0.000915084	-52.04	3.3348e-05	-52.7333	-2.11573e-05		-25.0478	0.000344524	-50.1003	-2.43363e-06	-50.7897	8.48269e-05
	470	0.05218	0.32116	0.67215													144929000000000	0.20475		144929000000000	0.59868		144929000000000	0.64403		-26.859	-0.000365945	-51.911	9.98137e-05	-52.6041	4.11438e-05		-24.9022	0.000350662	-49.9548	-1.15934e-06	-50.644	8.64805e-05
	471	0.04886	0.31409	0.66003													146206000000000	0.20636		146206000000000	0.60189		146206000000000	0.64725		-26.73	-0.000734696	-51.782	-3.64877e-05	-52.4749	1.97999e-05		-24.7566	0.000356897	-49.8093	1.25452e-07	-50.4984	8.81466e-05
	472	0.04635	0.30805	0.64595													147483000000000	0.20796		147483000000000	0.60508		147483000000000	0.65045		-26.601	-8.37226e-05	-51.653	1.92557e-05	-52.3458	0.000135749		-24.611	0.000363229	-49.6637	1.42085e-06	-50.3527	8.98255e-05
	473	0.04367	0.30183	0.63414													148760000000000	0.20955		148760000000000	0.60825		148760000000000	0.65361		-26.472	-0.000655509	-51.523	-4.23334e-05	-52.2166	0.000158247		-24.4654	0.00036966	-49.5182	2.72698e-06	-50.207	9.15173e-05
	474	0.0423	0.29561	0.62157													150037000000000	0.21115		150037000000000	0.61138		150037000000000	0.65675		-26.343	-0.000727632	-51.394	2.64361e-05	-52.0874	7.86398e-05		-24.3199	0.000376194	-49.3727	4.04395e-06	-50.0613	9.3222e-05
	475	0.04067	0.28929	0.60765													151313000000000	0.21274		151313000000000	0.6145		151313000000000	0.65986		-26.213	0.000256262	-51.265	-1.62446e-05	-51.9583	0.000161708		-24.1743	0.000382832	-49.2271	5.37189e-06	-49.9157	9.49399e-05
	476	0.03954	0.28306	0.59463													152590000000000	0.21433		152590000000000	0.61759		152590000000000	0.66294		-26.084	-0.000114169	-51.136	0.000108289	-51.8291	-7.7113e-05		-24.0287	0.000389575	-49.0816	6.7109e-06	-49.77	9.6671e-05
	477	0.03857	0.27759	0.58297													153867000000000	0.21591		153867000000000	0.62065		153867000000000	0.66599		-25.955	-6.86979e-06	-51.007	-6.64527e-05	-51.7	0.000106906		-23.8831	0.000396427	-48.9361	8.06112e-06	-49.6243	9.84155e-05
	478	0.03751	0.27174	0.56903													155144000000000	0.21749		155144000000000	0.62369		155144000000000	0.66902		-25.826	0.000205696	-50.878	2.51515e-05	-51.5708	0.000178437		-23.7375	0.000403389	-48.7905	9.42267e-06	-49.4786	0.000100173
	479	0.0376	0.26637	0.55585													156421000000000	0.21907		156421000000000	0.6267		156421000000000	0.67202		-25.697	9.50554e-05	-50.749	0.000166905	-51.4417	-7.53824e-05		-23.592	0.000410464	-48.645	1.07957e-05	-49.333	0.000101945
	480	0.03744	0.2608	0.54556													157698000000000	0.22064		157698000000000	0.62969		157698000000000	0.67499		-25.568	-0.000560047	-50.62	1.33132e-06	-51.3125	0.000134595		-23.4464	0.000417654	-48.4994	1.21802e-05	-49.1873	0.000103731
	481	0.03751	0.25589	0.53269													158974000000000	0.22221		158974000000000	0.63266		158974000000000	0.67793		-25.439	-0.000423403	-50.491	-1.62789e-05	-51.1834	-4.42833e-06		-23.3008	0.000424962	-48.3539	1.35765e-05	-49.0416	0.00010553
	482	0.038	0.25033	0.52028													160251000000000	0.22378		160251000000000	0.6356		160251000000000	0.68085		-25.31	0.000478548	-50.362	-3.62347e-05	-51.0542	0.000259775		-23.1552	0.000432389	-48.2084	1.49846e-05	-48.8959	0.000107343
	483	0.03833	0.2458	0.50937													161528000000000	0.22535		161528000000000	0.63852		161528000000000	0.68374		-25.181	0.00014499	-50.233	5.6636e-05	-50.9251	-1.0197e-05		-23.0096	0.00043994	-48.0628	1.64047e-05	-48.7503	0.000109171
	484	0.03905	0.24108	0.49696													162805000000000	0.22691		162805000000000	0.64142		162805000000000	0.68661		-25.052	-0.000390082	-50.104	1.49031e-05	-50.7959	-9.84569e-05		-22.864	0.000447615	-47.9173	1.78369e-05	-48.6046	0.000111013
	485	0.0397	0.23647	0.4862													164082000000000	0.22847		164082000000000	0.64429		164082000000000	0.68945		-24.923	0.000597438	-49.975	-9.48938e-06	-50.6668	5.15273e-05		-22.7185	0.000455418	-47.7718	1.92813e-05	-48.4589	0.000112869
	486	0.04051	0.23184	0.47515													164612000000000	0.22912		164612000000000	0.64548		164612000000000	0.69062		-24.794	-0.000204925	-49.846	-1.86765e-05	-50.5377	0.000129404		-22.5729	0.000463353	-47.6262	2.07381e-05	-48.3132	0.00011474
	487	0.04181	0.22713	0.46394													165359000000000	0.23002		165359000000000	0.64714		165359000000000	0.69226		-24.665	0.000644475	-49.717	1.4793e-05	-50.4085	4.22461e-06		-22.4273	0.00047142	-47.4807	2.22074e-05	-48.1676	0.000116626
	488	0.04278	0.2226	0.4541													166635000000000	0.23158		166635000000000	0.64997		166635000000000	0.69505		-24.535	0.000335101	-49.588	1.63945e-05	-50.2794	0.000133442		-22.2817	0.000479624	-47.3352	2.36894e-05	-48.0219	0.000118527
	489	0.044	0.21798	0.44245													167912000000000	0.23313		167912000000000	0.65277		167912000000000	0.69781		-24.406	-0.000497976	-49.459	3.78708e-06	-50.1503	0.000126519		-22.1361	0.000487967	-47.1896	2.51842e-05	-47.8762	0.000120443
	490	0.04521	0.21326	0.43275													169189000000000	0.23467		169189000000000	0.65555		169189000000000	0.70055		-24.277	-0.000448873	-49.33	1.14897e-05	-50.0212	0.000124212		-21.9905	0.000496453	-47.0441	2.66919e-05	-47.7305	0.000122374
	491	0.04659	0.20883	0.42261													170466000000000	0.23622		170466000000000	0.65831		170466000000000	0.70326		-24.148	-0.0002432	-49.201	-3.32285e-05	-49.8921	3.76826e-05		-21.845	0.000505084	-46.8986	2.82127e-05	-47.5849	0.000124321
	492	0.04829	0.20411	0.41246													171743000000000	0.23776		171743000000000	0.66105		171743000000000	0.70595		-24.019	-0.00023154	-49.072	-4.21944e-05	-49.763	0.000180168		-21.6994	0.000513863	-46.753	2.97467e-05	-47.4392	0.000126283
	493	0.04942	0.19986	0.40217													173020000000000	0.23929		173020000000000	0.66377		173020000000000	0.70861		-23.89	0.000319305	-48.943	2.61559e-05	-49.6339	-0.000100187		-21.5538	0.000522795	-46.6075	3.12942e-05	-47.2935	0.000128261
	494	0.05096	0.19515	0.39308													174296000000000	0.24083		174296000000000	0.66646		174296000000000	0.71125		-23.761	0.00164	-48.814	6.46573e-05	-49.5047	0.000131711		-21.4082	0.000531882	-46.462	3.28551e-05	-47.1478	0.000130255
	495	0.05267	0.19053	0.38309													175573000000000	0.24236		175573000000000	0.66913		175573000000000	0.71387		-23.632	0.000447962	-48.685	-1.6319e-05	-49.3756	-4.88467e-05		-21.2627	0.000541128	-46.3164	3.44298e-05	-47.0022	0.000132264
	496	0.05445	0.186	0.3734													176850000000000	0.24389		176850000000000	0.67178		176850000000000	0.71646		-23.503	-0.000136648	-48.556	-2.14312e-05	-49.2465	0.000224009		-21.1171	0.000550536	-46.1709	3.60183e-05	-46.8565	0.00013429
	497	0.05631	0.18195	0.364													178127000000000	0.24541		178127000000000	0.67441		178127000000000	0.71903		-23.374	-0.000482497	-48.427	5.55382e-06	-49.1174	0.000544745		-20.9715	0.000560111	-46.0254	3.76209e-05	-46.7108	0.000136333
	498	0.05785	0.1776	0.35507													179404000000000	0.24693		179404000000000	0.67702		179404000000000	0.72157		-23.245	0.000781193	-48.298	2.84915e-05	-48.9883	-6.90369e-05		-20.8259	0.000569855	-45.8798	3.92376e-05	-46.5651	0.000138392
	499	0.05971	0.17317	0.34584													180681000000000	0.24845		180681000000000	0.67961		180681000000000	0.72409		-23.116	-0.000777868	-48.169	-3.61736e-05	-48.8592	0.000175553		-20.6803	0.000579773	-45.7343	4.08687e-05	-46.4195	0.000140467
	500	0.06166	0.16893	0.33676													181957000000000	0.24997		181957000000000	0.68217		181957000000000	0.72659		-22.987	-0.000157187	-48.04	5.90334e-05	-48.7302	4.92199e-05		-20.5347	0.000589868	-45.5887	4.25143e-05	-46.2738	0.00014256
	501	0.06329	0.16468	0.32783													183234000000000	0.25148		183234000000000	0.68472		183234000000000	0.72907		-22.858	0.00121	-47.911	-3.21485e-06	-48.6011	2.90297e-05		-20.3892	0.000600145	-45.4432	4.41746e-05	-46.1281	0.000144669
	502	0.06482	0.16044	0.31889													184511000000000	0.25299		184511000000000	0.68725		184511000000000	0.73152		-22.729	-0.000126156	-47.782	7.26018e-05	-48.472	0.000204973		-20.2436	0.000610609	-45.2977	4.58497e-05	-45.9824	0.000146796
	503	0.06604	0.15629	0.30981													185788000000000	0.25449		185788000000000	0.68975		185788000000000	0.73396		-22.6	0.00039083	-47.653	1.14163e-05	-48.3429	0.000102868		-20.098	0.000621262	-45.1521	4.75398e-05	-45.8368	0.00014894
	504	0.0675	0.15214	0.30042													187065000000000	0.256		187065000000000	0.69224		187065000000000	0.73637		-22.471	-0.000118656	-47.524	4.24753e-06	-48.2138	8.72928e-05		-19.9524	0.00063211	-45.0066	4.92452e-05	-45.6911	0.000151102
	505	0.06879	0.1477	0.29163													188342000000000	0.2575		188342000000000	0.6947		188342000000000	0.73875		-22.342	0.00091693	-47.395	7.94869e-05	-48.0847	4.22461e-06		-19.8068	0.000643156	-44.8611	5.09659e-05	-45.5454	0.000153282
	506	0.07001	0.14365	0.28285													189618000000000	0.25899		189618000000000	0.69715		189618000000000	0.74112		-22.213	1.7525e-06	-47.266	5.66961e-05	-47.9557	0.000241315		-19.6612	0.000654407	-44.7155	5.27022e-05	-45.3997	0.00015548
	507	0.07098	0.1395	0.27422													190895000000000	0.26049		190895000000000	0.69957		190895000000000	0.74347		-22.084	0.000385479	-47.137	5.30708e-05	-47.8266	5.09505e-05		-19.5157	0.000665866	-44.57	5.44543e-05	-45.2541	0.000157696
	508	0.07139	0.13535	0.26544													192172000000000	0.26198		192172000000000	0.70198		192172000000000	0.74579		-21.955	-0.000201864	-47.008	-4.11332e-05	-47.6975	9.59457e-05		-19.3701	0.000677539	-44.4245	5.62223e-05	-45.1084	0.00015993
	509	0.07219	0.13111	0.25574													193449000000000	0.26347		193449000000000	0.70437		193449000000000	0.74809		-21.826	3.21525e-05	-46.879	3.22769e-05	-47.5685	6.30646e-05		-19.2245	0.00068943	-44.2789	5.80064e-05	-44.9627	0.000162183
	510	0.0726	0.12743	0.24696													194726000000000	0.26495		194726000000000	0.70674		194726000000000	0.75037		-21.697	0.000875431	-46.75	4.9866e-06	-47.4394	0.000331306		-19.0789	0.000701545	-44.1334	5.98068e-05	-44.8171	0.000164454
	511	0.07284	0.12338	0.23788													196002000000000	0.26643		196002000000000	0.70909		196002000000000	0.75264		-21.568	-0.000238316	-46.621	-1.46094e-05	-47.3103	6.76795e-05		-18.9333	0.000713888	-43.9879	6.16238e-05	-44.6714	0.000166745
	512	0.07292	0.11922	0.22789													197279000000000	0.26791		197279000000000	0.71142		197279000000000	0.75488		-21.439	0.000469155	-46.492	2.19951e-05	-47.1813	0.000124789		-18.7878	0.000726467	-43.8423	6.34575e-05	-44.5257	0.000169055
	513	0.07268	0.11516	0.21896													198556000000000	0.26939		198556000000000	0.71373		198556000000000	0.7571		-21.31	-8.88866e-05	-46.363	7.68026e-05	-47.0522	0.000159977		-18.6422	0.000739285	-43.6968	6.5308e-05	-44.38	0.000171384
	514	0.07236	0.11139	0.20911													199833000000000	0.27086		199833000000000	0.71602		199833000000000	0.7593		-21.181	-0.000321875	-46.234	-8.84688e-05	-46.9232	0.000131134		-18.4966	0.000752349	-43.5513	6.71757e-05	-44.2343	0.000173732
	515	0.07187	0.10696	0.19896													201110000000000	0.27233		201110000000000	0.7183		201110000000000	0.76148		-21.052	0.00145	-46.105	2.77624e-05	-46.7941	2.38379e-05		-18.351	0.000765665	-43.4057	6.90608e-05	-44.0887	0.000176101
	516	0.07106	0.10328	0.18913													202387000000000	0.2738		202387000000000	0.72055		202387000000000	0.76364		-20.923	-0.000174549	-45.976	1.71753e-05	-46.6651	8.78696e-05		-18.2054	0.00077924	-43.2602	7.09633e-05	-43.943	0.000178489
	517	0.07009	0.09979	0.17928													203663000000000	0.27526		203663000000000	0.72279		203663000000000	0.76578		-20.794	5.97017e-05	-45.848	7.67259e-06	-46.536	8.2101e-05		-18.0599	0.000793078	-43.1146	7.28836e-05	-43.7973	0.000180898
	518	0.06879	0.09564	0.16929													204940000000000	0.27673		204940000000000	0.72501		204940000000000	0.7679		-20.665	0.000515748	-45.719	1.35417e-05	-46.407	0.000332459		-17.9143	0.000807187	-42.9691	7.48219e-05	-43.6516	0.000183327
	519	0.06742	0.09159	0.15914													206217000000000	0.27818		206217000000000	0.72722		206217000000000	0.77		-20.536	-0.000408098	-45.59	0.000100506	-46.2779	6.01802e-05		-17.7687	0.000821574	-42.8236	7.67784e-05	-43.506	0.000185777
	520	0.06604	0.0881	0.14869													207494000000000	0.27964		207494000000000	0.7294		207494000000000	0.77209		-20.407	-5.73417e-05	-45.461	-1.27201e-05	-46.1489	0.000167477		-17.6231	0.000836245	-42.678	7.87533e-05	-43.3603	0.000188248
	521	0.06377	0.08451	0.1384													208771000000000	0.28109		208771000000000	0.73157		208771000000000	0.77415		-20.278	0.000801709	-45.332	9.33923e-06	-46.0199	-2.28879e-05		-17.4775	0.000851207	-42.5325	8.07468e-05	-43.2146	0.00019074
	522	0.0619	0.08064	0.12916													210048000000000	0.28254		210048000000000	0.73372		210048000000000	0.7762		-20.149	0.00143	-45.203	4.82911e-05	-45.8909	0.000268428		-17.3319	0.000866467	-42.387	8.27591e-05	-43.069	0.000193253
	523	0.05988	0.07716	0.11962													211324000000000	0.28399		211324000000000	0.73585		211324000000000	0.77823		-20.02	-0.000153075	-45.074	-3.50346e-06	-45.7618	8.09473e-05		-17.1864	0.000882034	-42.2414	8.47906e-05	-42.9233	0.000195787
	524	0.05729	0.07386	0.10978													212601000000000	0.28543		212601000000000	0.73797		212601000000000	0.78023		-19.891	-8.75547e-05	-44.945	5.02997e-06	-45.6328	-4.13475e-05		-17.0408	0.000897914	-42.0959	8.68414e-05	-42.7776	0.000198344
	525	0.05518	0.07008	0.10069													213878000000000	0.28687		213878000000000	0.74007		213878000000000	0.78222		-19.762	0.000324446	-44.816	0.000139907	-45.5038	0.000170938		-16.8952	0.000914116	-41.9504	8.89118e-05	-42.6319	0.000200923
	526	0.05234	0.06659	0.09207													215155000000000	0.28831		215155000000000	0.74215		215155000000000	0.7842		-19.633	0.000508551	-44.687	-5.11883e-05	-45.3748	0.000210164		-16.7496	0.000930647	-41.8048	9.1002e-05	-42.4862	0.000203523
	527	0.04958	0.0631	0.08404													216432000000000	0.28975		216432000000000	0.74422		216432000000000	0.78615		-19.504	0.000467146	-44.558	7.20512e-05	-45.2458	0.000159401		-16.604	0.000947516	-41.6593	9.31123e-05	-42.3406	0.000206147
	528	0.04691	0.06018	0.07601													217709000000000	0.29118		217709000000000	0.74627		217709000000000	0.78809		-19.375	0.000506238	-44.429	-1.39036e-05	-45.1167	8.55622e-05		-16.4584	0.000964732	-41.5138	9.52429e-05	-42.1949	0.000208793
	529	0.04449	0.05754	0.06875													218985000000000	0.29261		218985000000000	0.7483		218985000000000	0.79001		-19.247	-1.4277e-05	-44.301	-1.59192e-05	-44.9877	0.000183052		-16.3129	0.000982303	-41.3682	9.73941e-05	-42.0492	0.000211462
	530	0.04181	0.05461	0.06178													220262000000000	0.29403		220262000000000	0.75031		220262000000000	0.79191		-19.118	0.00024591	-44.172	6.36062e-05	-44.8587	0.00010806		-16.1673	0.001	-41.2227	9.95661e-05	-41.9036	0.000214155
	531	0.03914	0.05197	0.05542													221539000000000	0.29546		221539000000000	0.75231		221539000000000	0.7938		-18.989	0.000216118	-44.043	-3.93055e-06	-44.7297	9.0754e-05		-16.0217	0.00102	-41.0772	0.000101759	-41.7579	0.000216871
	532	0.03654	0.04933	0.04997													222816000000000	0.29688		222816000000000	0.7543		222816000000000	0.79566		-18.86	-0.00115	-43.914	-3.34926e-05	-44.6007	6.71026e-05		-15.8761	0.00104	-40.9316	0.000103974	-41.6122	0.000219611
	533	0.03435	0.04613	0.04407													224093000000000	0.2983		224093000000000	0.75627		224093000000000	0.79752		-18.731	0.0001967	-43.785	9.89528e-05	-44.4717	0.000126519		-15.7305	0.00106	-40.7861	0.00010621	-41.4665	0.000222375
	534	0.03176	0.04358	0.03952													225370000000000	0.29971		225370000000000	0.75822		225370000000000	0.79935		-18.602	0.000123119	-43.656	-2.95452e-05	-44.3427	0.000149017		-15.585	0.00108	-40.6405	0.000108468	-41.3209	0.000225163
	535	0.02917	0.04141	0.03513													226646000000000	0.30112		226646000000000	0.76016		226646000000000	0.80117		-18.473	-0.000303322	-43.527	-4.45025e-05	-44.2137	3.01834e-05		-15.4394	0.0011	-40.495	0.000110748	-41.1752	0.000227976
	536	0.02706	0.03924	0.03149													227923000000000	0.30253		227923000000000	0.76208		227923000000000	0.80297		-18.344	0.000803882	-43.398	8.12503e-05	-44.0847	3.07603e-05		-15.2938	0.00112	-40.3495	0.000113051	-41.0295	0.000230814
	537	0.02471	0.03679	0.0265													229200000000000	0.30394		229200000000000	0.76398		229200000000000	0.80475		-18.215	0.00097794	-43.269	-2.53084e-06	-43.9558	3.99901e-05		-15.1482	0.00114	-40.2039	0.000115376	-40.8838	0.000233677
	538	0.02252	0.03481	0.02332													230477000000000	0.30534		230477000000000	0.76588		230477000000000	0.80652		-18.086	-4.15926e-06	-43.141	1.61226e-05	-43.8268	0.000142095		-15.0026	0.00116	-40.0584	0.000117725	-40.7382	0.000236566
	539	0.02066	0.03301	0.02014													231754000000000	0.30674		231754000000000	0.76775		231754000000000	0.80827		-17.957	0.000367908	-43.012	1.3158e-05	-43.6978	0.000280542		-14.857	0.00118	-39.9129	0.000120097	-40.5925	0.00023948
	540	0.01888	0.03122	0.01756													233031000000000	0.30814		233031000000000	0.76961		233031000000000	0.81001		-17.828	1.00476e-06	-42.883	6.6721e-05	-43.5688	-2.17342e-05		-14.7115	0.0012	-39.7673	0.000122492	-40.4468	0.00024242
	541	0.01701	0.02943	0.01485													234307000000000	0.30954		234307000000000	0.77146		234307000000000	0.81173		-17.699	0.000208617	-42.754	6.60119e-05	-43.4398	4.69124e-05		-14.5659	0.00122	-39.6218	0.000124912	-40.3011	0.000245387
	542	0.01523	0.02764	0.01287													235584000000000	0.31093		235584000000000	0.77329		235584000000000	0.81344		-17.571	0.000315029	-42.625	3.56336e-05	-43.3109	0.000263236		-14.4203	0.00125	-39.4763	0.000127356	-40.1555	0.00024838
	543	0.01377	0.02593	0.01105													236861000000000	0.31232		236861000000000	0.7751		236861000000000	0.81513		-17.442	0.000685086	-42.496	-1.37803e-06	-43.1819	0.000198627		-14.2747	0.00127	-39.3307	0.000129824	-40.0098	0.0002514
	544	0.0124	0.02424	0.00924													238138000000000	0.3137		238138000000000	0.77691		238138000000000	0.8168		-17.313	0.000414057	-42.367	-2.28548e-05	-43.0529	0.000120174		-14.1291	0.0013	-39.1852	0.000132318	-39.8641	0.000254448
	545	0.0111	0.02292	0.00773													239415000000000	0.31509		239415000000000	0.77869		239415000000000	0.81846		-17.184	0.000241377	-42.238	-1.27618e-05	-42.924	1.28775e-05		-13.9836	0.00132	-39.0397	0.000134836	-39.7184	0.000257523
	546	0.00964	0.02141	0.00621													240692000000000	0.31647		240692000000000	0.78047		240692000000000	0.82011		-17.055	0.000213197	-42.11	3.83329e-05	-42.795	0.000222279		-13.838	0.00135	-38.8941	0.00013738	-39.5728	0.000260626
	547	0.00834	0.02009	0.00515													241968000000000	0.31785		241968000000000	0.78222		241968000000000	0.82174		-16.926	-0.000838792	-41.981	1.47062e-05	-42.666	-4.48087e-05		-13.6924	0.00137	-38.7486	0.00013995	-39.4271	0.000263757
	548	0.00737	0.01858	0.00409													243245000000000	0.31922		243245000000000	0.78397		243245000000000	0.82335		-16.797	0.000520421	-41.852	4.09288e-05	-42.5371	4.80661e-05		-13.5468	0.0014	-38.6031	0.000142547	-39.2814	0.000266916
	549	0.00632	0.01773	0.00334													244522000000000	0.3206		244522000000000	0.7857		244522000000000	0.82495		-16.668	0.000638657	-41.723	6.02262e-05	-42.4081	0.000200358		-13.4012	0.00142	-38.4575	0.00014517	-39.1357	0.000270105
	550	0.00543	0.0166	0.00273													245799000000000	0.32197		245799000000000	0.78742		245799000000000	0.82654		-16.539	0.000323417	-41.594	-7.61253e-06	-42.2792	2.15305e-05		-13.2556	0.00145	-38.312	0.00014782	-38.9901	0.000273322
	551	0.00478	0.01584	0.00197													247076000000000	0.32333		247076000000000	0.78912		247076000000000	0.82811		-16.411	0.00264	-41.465	2.20251e-05	-42.1502	6.59489e-05		-13.1101	0.00148	-38.1665	0.000150497	-38.8444	0.000276569
	552	0.00413	0.01462	0.00152													248353000000000	0.3247		248353000000000	0.79081		248353000000000	0.82967		-16.282	0.0017	-41.337	-3.73244e-05	-42.0213	7.05638e-05		-12.9645	0.00151	-38.0209	0.000153202	-38.6987	0.000279846
	553	0.00348	0.01386	0.00152													249629000000000	0.32606		249629000000000	0.79249		249629000000000	0.83121		-16.153	0.000743596	-41.208	-1.55821e-06	-41.8924	0.000123058		-12.8189	0.00154	-37.8754	0.000155935	-38.553	0.000283153
	554	0.00292	0.01339	0.00106													250906000000000	0.32742		250906000000000	0.79415		250906000000000	0.83274		-16.024	-0.00013784	-41.079	4.70131e-06	-41.7634	9.24845e-05		-12.6733	0.00157	-37.7298	0.000158697	-38.4074	0.000286491
	555	0.00243	0.01245	0.000454277													252183000000000	0.32877		252183000000000	0.7958		252183000000000	0.83425		-15.895	0.00177	-40.95	4.46124e-05	-41.6345	5.21042e-05		-12.5277	0.0016	-37.5843	0.000161487	-38.2617	0.000289859
	556	0.00186	0.01188	-0.000149579													253460000000000	0.33013		253460000000000	0.79743		253460000000000	0.83575		-15.766	0.00133	-40.821	5.74368e-05	-41.5055	0.000157093		-12.3822	0.00163	-37.4388	0.000164307	-38.116	0.000293259
	557	0.00178	0.01122	0													254737000000000	0.33148		254737000000000	0.79906		254737000000000	0.83724		-15.637	0.000612486	-40.692	5.40468e-05	-41.3766	0.000213626		-12.2366	0.00166	-37.2933	0.000167156	-37.9703	0.00029669
	558	0.00113	0.01056	-0.000299158													256014000000000	0.33283		256014000000000	0.80067		256014000000000	0.83872		-15.509	0.00142	-40.564	0.000101082	-41.2477	-4.30781e-05		-12.091	0.0017	-37.1477	0.000170035	-37.8247	0.000300154
	559	0.0006456	0.00999	-0.000448737													257290000000000	0.33417		257290000000000	0.80226		257290000000000	0.84018		-15.38	0.00227	-40.435	6.17127e-05	-41.1188	5.84497e-05		-11.9454	0.00173	-37.0022	0.000172945	-37.679	0.00030365
	560	0.000564	0.00962	-0.000448737													258567000000000	0.33551		258567000000000	0.80385		258567000000000	0.84162		-15.251	-4.18496e-05	-40.306	9.65338e-05	-40.9898	0.000287464		-11.7998	0.00177	-36.8566	0.000175885	-37.5333	0.000307178
	561	0.000239982	0.00924	-0.000299158													259844000000000	0.33685		259844000000000	0.80542		259844000000000	0.84306		-15.122	0.00148	-40.177	3.79559e-05	-40.8609	3.24909e-05		-11.6542	0.0018	-36.7111	0.000178857	-37.3876	0.00031074
	562	0.000160813	0.00868	-0.000603857													261121000000000	0.33819		261121000000000	0.80698		261121000000000	0.84448		-14.993	0.000718874	-40.048	-1.98721e-05	-40.732	0.000159977		-11.5087	0.00184	-36.5656	0.000181861	-37.242	0.000314335
	563	0	0.00848	-0.00121													262398000000000	0.33952		262398000000000	0.80852		262398000000000	0.84589		-14.864	0.000592321	-39.92	6.20881e-05	-40.6031	0.00026439		-11.3631	0.00187	-36.42	0.000184896	-37.0963	0.000317964
	564	-0.000324	0.00811	-0.000753436													263675000000000	0.34086		263675000000000	0.81006		263675000000000	0.84729		-14.735	0.000575707	-39.791	2.4641e-05	-40.4742	0.000134019		-11.2175	0.00191	-36.2745	0.000187964	-36.9506	0.000321627
	565	-0.0006528	0.00782	-0.000903015													264951000000000	0.34219		264951000000000	0.81158		264951000000000	0.84867		-14.607	0.000383563	-39.662	-9.81637e-06	-40.3453	-1.53887e-05		-11.0719	0.00195	-36.129	0.000191066	-36.8049	0.000325325
	566	-0.0004872	0.00764	-0.000903015													266228000000000	0.34351		266228000000000	0.81309		266228000000000	0.85004		-14.478	1.9628e-06	-39.533	2.51248e-05	-40.2164	0.000149594		-10.9263	0.00199	-35.9834	0.000194201	-36.6593	0.000329058
	567	-0.0006528	0.00745	-0.000753436													267505000000000	0.34484		267505000000000	0.81459		267505000000000	0.8514		-14.349	0.00148	-39.404	0.000144972	-40.0875	-1.4235e-05		-10.7808	0.00203	-35.8379	0.000197369	-36.5136	0.000332827
	568	-0.0008112	0.00726	-0.00105													268782000000000	0.34616		268782000000000	0.81607		268782000000000	0.85274		-14.22	0.00124	-39.276	1.03135e-05	-39.9586	0.000212472		-10.6352	0.00207	-35.6924	0.000200573	-36.3679	0.000336632
	569	-0.0009792	0.00698	-0.000903015													270059000000000	0.34748		270059000000000	0.81754		270059000000000	0.85408		-14.091	0.000244999	-39.147	8.6971e-05	-39.8297	0.000155363		-10.4896	0.00212	-35.5468	0.000203811	-36.2222	0.000340473
	570	-0.00114	0.00669	-0.00105													271336000000000	0.34879		271336000000000	0.81901		271336000000000	0.8554		-13.962	0.000560799	-39.018	8.12704e-05	-39.7008	0.000107483		-10.344	0.00216	-35.4013	0.000207084	-36.0766	0.00034435
	571	-0.0013	0.0066	-0.000903015													272612000000000	0.3501		272612000000000	0.82046		272612000000000	0.85671		-13.834	0.00204	-38.889	1.60876e-05	-39.5719	0.000131711		-10.1984	0.0022	-35.2558	0.000210394	-35.9309	0.000348266
	572	-0.00114	0.00632	-0.00105													273889000000000	0.35141		273889000000000	0.82189		273889000000000	0.85801		-13.705	0.00164	-38.76	0.000204704	-39.443	0.000221702		-10.0528	0.00225	-35.1102	0.00021374	-35.7852	0.000352218
	573	-0.00114	0.00622	-0.000603857													275166000000000	0.35272		275166000000000	0.82332		275166000000000	0.85929		-13.576	0.000339774	-38.632	0.000149616	-39.3141	0.000121905		-9.90727	0.0023	-34.9647	0.000217123	-35.6395	0.000356209
	574	-0.00121	0.00585	-0.000903015													276443000000000	0.35403		276443000000000	0.82474		276443000000000	0.86057		-13.447	0.00132	-38.503	4.04734e-05	-39.1853	0.000120174		-9.76169	0.00235	-34.8192	0.000220544	-35.4939	0.000360239
	575	-0.00138	0.00585	-0.000753436													277720000000000	0.35533		277720000000000	0.82614		277720000000000	0.86183		-13.318	0.000922982	-38.374	0.000137304	-39.0564	-7.94204e-05		-9.6161	0.00239	-34.6736	0.000224002	-35.3482	0.000364308
	576	-0.00138	0.00556	-0.000753436													278997000000000	0.35663		278997000000000	0.82753		278997000000000	0.86308		-13.19	0.00211	-38.245	-9.00891e-08	-38.9275	0.000224586		-9.47052	0.00244	-34.5281	0.000227499	-35.2025	0.000368416
	577	-0.00138	0.00547	-0.00105													280273000000000	0.35793		280273000000000	0.82892		280273000000000	0.86432		-13.061	0.00094275	-38.117	6.4774e-05	-38.7986	-1.71193e-05		-9.32494	0.0025	-34.3826	0.000231035	-35.0568	0.000372564
	578	-0.00146	0.00547	-0.000903015													281550000000000	0.35922		281550000000000	0.83029		281550000000000	0.86555		-12.932	0.00129	-37.988	9.65004e-05	-38.6698	0.000122481		-9.17936	0.00255	-34.237	0.000234611	-34.9112	0.000376753
	579	-0.00114	0.00528	-0.000753436													282827000000000	0.36051		282827000000000	0.83165		282827000000000	0.86677		-12.803	0.00155	-37.859	6.63473e-05	-38.5409	0.000247661		-9.03378	0.0026	-34.0915	0.000238227	-34.7655	0.000380983
	580	-0.00121	0.00518	-0.000903015													284104000000000	0.3618		284104000000000	0.83299		284104000000000	0.86798		-12.674	0.00156	-37.73	8.95886e-05	-38.412	0.000182475		-8.8882	0.00266	-33.9459	0.000241885	-34.6198	0.000385254
	581	-0.0013	0.00528	-0.000903015													285381000000000	0.36309		285381000000000	0.83433		285381000000000	0.86917		-12.546	0.00294	-37.602	6.42585e-05	-38.2832	0.00011729		-8.74261	0.00271	-33.8004	0.000245583	-34.4742	0.000389567
	582	-0.00146	0.00518	-0.000448737													286658000000000	0.36437		286658000000000	0.83566		286658000000000	0.87036		-12.417	0.000144406	-37.473	8.6287e-05	-38.1543	0.000155939		-8.683	0.00274	-33.6549	0.000249324	-34.3285	0.000393923
	583	-0.00121	0.005	-0.000603857													287934000000000	0.36566		287934000000000	0.83698		287934000000000	0.87153		-12.288	0.00304	-37.344	5.396e-05	-38.0254	0.000202088		-8.59703	0.00277	-33.5093	0.000253107	-34.1828	0.000398322
	584	-0.0013	0.0049	-0.000448737													289211000000000	0.36693		289211000000000	0.83828		289211000000000	0.8727		-12.159	0.00286	-37.215	3.57136e-05	-37.8966	0.000158824		-8.555	0.00279	-33.3638	0.000256933	-34.0371	0.000402764
	585	-0.0013	0.0049	-0.000448737													290488000000000	0.36821		290488000000000	0.83958		290488000000000	0.87385		-12.03	0.000510234	-37.087	-7.96621e-06	-37.7677	7.86398e-05		-8.45145	0.00283	-33.2183	0.000260804	-33.8914	0.000407251
	586	-0.00138	0.00462	-0.000448737													291765000000000	0.36949		291765000000000	0.84086		291765000000000	0.87499		-11.902	0.000621248	-36.958	7.92684e-05	-37.6389	7.8063e-05		-8.426	0.00284	-33.0727	0.000264719	-33.7458	0.000411782
	587	-0.00138	0.00452	-0.000603857													293042000000000	0.37076		293042000000000	0.84214		293042000000000	0.87613		-11.773	0.00136	-36.829	7.78737e-05	-37.51	6.59489e-05		-8.30587	0.00289	-32.9272	0.000268679	-33.6001	0.000416358
	588	-0.00154	0.00443	-0.000149579													294318000000000	0.37203		294318000000000	0.8434		294318000000000	0.87725		-11.644	0.00108	-36.7	3.04001e-05	-37.3812	0.000271889		-8.297	0.0029	-32.7817	0.000272686	-33.4544	0.00042098
	589	-0.00154	0.00452	-0.000603857													295595000000000	0.37329		295595000000000	0.84466		295595000000000	0.87836		-11.515	0.00232	-36.572	0.000231517	-37.2524	0.000140364		-8.168	0.00295	-32.6361	0.000276739	-33.3088	0.000425648
	590	-0.00138	0.00462	-0.000603857													296872000000000	0.37456		296872000000000	0.8459		296872000000000	0.87946		-11.387	0.00271	-36.443	0.000142422	-37.1235	7.11406e-05		-8.16029	0.00295	-32.4906	0.000280839	-33.1631	0.000430363
	591	-0.00138	0.00443	-0.000603857													298149000000000	0.37582		298149000000000	0.84714		298149000000000	0.88055		-11.258	0.00141	-36.314	5.24035e-05	-36.9947	0.000206126		-8.04	0.00301	-32.3451	0.000284987	-33.0174	0.000435126
	592	-0.00138	0.00443	-0.000603857													299426000000000	0.37708		299426000000000	0.84836		299426000000000	0.88164		-11.129	0.00119	-36.185	-9.99321e-07	-36.8659	0.000181321		-8.01471	0.00302	-32.1995	0.000289184	-32.8717	0.000439936
	593	-0.00146	0.00415	-0.000299158													300703000000000	0.37833		300703000000000	0.84958		300703000000000	0.88271		-11	0.000714879	-36.057	4.19164e-05	-36.737	7.46018e-05		-7.911	0.00306	-32.054	0.00029343	-32.7261	0.000444795
	594	-0.0013	0.00434	-0.000753436													301979000000000	0.37958		301979000000000	0.85078		301979000000000	0.88377		-10.872	0.00375	-35.928	3.34097e-05	-36.6082	0.000395914		-7.86912	0.00308	-31.9084	0.000297727	-32.5804	0.000449704
	595	-0.00138	0.00405	-0.000448737													303256000000000	0.38084		303256000000000	0.85198		303256000000000	0.88482		-10.743	0.00165	-35.799	8.12403e-05	-36.4794	7.28712e-05		-7.782	0.00312	-31.7629	0.000302075	-32.4347	0.000454662
	596	-0.0013	0.00415	-0.000603857													304533000000000	0.38208		304533000000000	0.85316		304533000000000	0.88587		-10.614	0.00198	-35.671	9.44784e-05	-36.3506	0.000123058		-7.72354	0.00315	-31.6174	0.000306474	-32.289	0.00045967
	597	-0.00146	0.00387	-0.000448737													305810000000000	0.38333		305810000000000	0.85434		305810000000000	0.8869		-10.485	0.00153	-35.542	0.000128415	-36.2218	6.65257e-05		-7.654	0.00318	-31.4718	0.000310926	-32.1433	0.00046473
	598	-0.0013	0.00377	-0.000603857													307087000000000	0.38457		307087000000000	0.8555		307087000000000	0.88792		-10.357	0.00296	-35.413	-1.21822e-05	-36.093	0.000268428		-7.57796	0.00322	-31.3263	0.000315431	-31.9977	0.000469841
	599	-0.00138	0.00377	-0.000603857													308364000000000	0.38581		308364000000000	0.85666		308364000000000	0.88894		-10.228	0.00224	-35.285	0.000112196	-35.9641	0.000255737		-7.525	0.00324	-31.1808	0.000319991	-31.852	0.000475005
	600	-0.00121	0.00377	-0.000753436													309640000000000	0.38705		309640000000000	0.85781		309640000000000	0.88995		-10.099	0.00215	-35.156	1.14513e-05	-35.8353	0.000199781		-7.43238	0.00328	-31.0352	0.000324605	-31.7063	0.000480222
	601	-0.00154	0.00368	-0.000753436													310917000000000	0.38829		310917000000000	0.85895		310917000000000	0.89094		-9.97	0.00206	-35.027	0.000103718	-35.7065	0.000279965		-7.396	0.0033	-30.8897	0.000329276	-31.5607	0.000485492
	602	-0.00138	0.00377	-0.000299158													312194000000000	0.38952		312194000000000	0.86008		312194000000000	0.89193		-9.842	0.00355	-34.898	0.000143253	-35.5777	0.000183629		-7.2868	0.00335	-30.7442	0.000334003	-31.415	0.000490816
	603	-0.00146	0.00339	-0.000448737													313471000000000	0.39075		313471000000000	0.8612		313471000000000	0.89291		-9.713	0.00236	-34.77	5.25853e-05	-35.4489	0.000279965		-7.268	0.00336	-30.5986	0.000338787	-31.2693	0.000496196
	604	-0.00138	0.00349	-0.000448737													314748000000000	0.39198		314748000000000	0.86231		314748000000000	0.89388		-9.584	0.000710883	-34.641	0.000113164	-35.3201	0.000102868		-7.14121	0.00343	-30.4531	0.000343631	-31.1236	0.000501631
	605	-0.0013	0.00321	-0.000603857													316025000000000	0.39321		316025000000000	0.86342		316025000000000	0.89484		-9.456	0.0032	-34.512	0.000165534	-35.1913	0.00013921		-7.139	0.00343	-30.3076	0.000348533	-30.978	0.000507122
	606	-0.00138	0.0033	-0.000448737													317301000000000	0.39443		317301000000000	0.86451		317301000000000	0.89579		-9.327	0.0024	-34.384	5.71265e-05	-35.0626	0.000158247		-7.01	0.00349	-30.162	0.000353496	-30.8323	0.000512671
	607	-0.00138	0.00311	-0.000603857													318578000000000	0.39565		318578000000000	0.8656		318578000000000	0.89674		-9.198	0.00401	-34.255	4.65444e-05	-34.9338	0.000237854		-6.99563	0.0035	-30.0165	0.00035852	-30.6866	0.000518277
	608	-0.00146	0.00311	-0.000448737													319855000000000	0.39687		319855000000000	0.86667		319855000000000	0.89767		-9.069	0.00214	-34.126	0.000117503	-34.805	0.000147286		-6.882	0.00356	-29.871	0.000363607	-30.5409	0.000523942
	609	-0.00138	0.00302	-0.000299158													321132000000000	0.39809		321132000000000	0.86774		321132000000000	0.8986		-8.941	0.0013	-33.998	5.17378e-05	-34.6762	3.36446e-05		-6.85005	0.00357	-29.7254	0.000368757	-30.3953	0.000529666
	610	-0.00138	0.00311	-0.000603857													322409000000000	0.3993		322409000000000	0.8688		322409000000000	0.89952		-8.812	0.00205	-33.869	0.000181389	-34.5474	0.000269581		-6.753	0.00363	-29.5799	0.000373971	-30.2496	0.00053545
	611	-0.00138	0.00302	-0.00105													323686000000000	0.40051		323686000000000	0.86985		323686000000000	0.90043		-8.683	0.0034	-33.74	0.000169618	-34.4186	0.000254583		-6.70447	0.00365	-29.4343	0.00037925	-30.1039	0.000541295
	612	-0.00146	0.00302	-0.000603857													324962000000000	0.40172		324962000000000	0.87089		324962000000000	0.90133		-8.555	0.00157	-33.612	9.63269e-05	-34.2899	7.97936e-05		-6.624	0.00369	-29.2888	0.000384595	-29.9582	0.000547201
	613	-0.00154	0.00302	-0.000753436													326239000000000	0.40293		326239000000000	0.87193		326239000000000	0.90222		-8.426	0.00244	-33.483	4.02681e-05	-34.1611	0.000180168		-6.55889	0.00373	-29.1433	0.000390008	-29.8126	0.00055317
	614	-0.00138	0.00302	-0.000753436													327516000000000	0.40413		327516000000000	0.87295		327516000000000	0.90311		-8.297	0.00386	-33.354	6.54097e-05	-34.0323	0.000120174		-6.496	0.00376	-28.9977	0.00039549	-29.6669	0.000559201
	615	-0.00146	0.00302	-0.000448737													328793000000000	0.40533		328793000000000	0.87397		328793000000000	0.90399		-8.168	0.00248	-33.226	6.80673e-05	-33.9036	0.000150171		-6.41331	0.00381	-28.8522	0.000401041	-29.5212	0.000565297
	616	-0.00138	0.00292	-0.00105													329223000000000	0.40574		329223000000000	0.87431		329223000000000	0.90428		-8.04	0.00291	-33.097	0.000127503	-33.7748	0.000218817		-6.367	0.00383	-28.7067	0.000406662	-29.3755	0.000571457
	617	-0.0013	0.00283	-0.000903015													330070000000000	0.40653		330070000000000	0.87498		330070000000000	0.90486		-7.911	0.00371	-32.968	2.18282e-05	-33.6461	0.000175553		-6.26772	0.00389	-28.5611	0.000412356	-29.2299	0.000577682
	618	-0.00138	0.00292	-0.000753436													331347000000000	0.40773		331347000000000	0.87598		331347000000000	0.90572		-7.782	0.00441	-32.84	0.000216055	-33.5173	0.000106329		-6.238	0.0039	-28.4156	0.000418122	-29.0842	0.000583974
	619	-0.0013	0.00264	-0.000753436													332623000000000	0.40892		332623000000000	0.87698		332623000000000	0.90657		-7.654	0.00271	-32.711	9.09866e-05	-33.3885	8.55622e-05		-6.12214	0.00397	-28.2701	0.000423962	-28.9385	0.000590333
	620	-0.0013	0.00264	-0.000603857													333900000000000	0.41011		333900000000000	0.87796		333900000000000	0.90742		-7.525	0.00274	-32.583	0.000111312	-33.2598	0.000238431		-6.11	0.00398	-28.1245	0.000429878	-28.7928	0.000596759
	621	-0.00138	0.00274	-0.000448737													335177000000000	0.4113		335177000000000	0.87894		335177000000000	0.90826		-7.396	0.00173	-32.454	0.000202917	-33.131	0.000186513		-5.981	0.00405	-27.979	0.00043587	-28.6472	0.000603255
	622	-0.0013	0.00254	-0.000448737													336454000000000	0.41249		336454000000000	0.87991		336454000000000	0.90909		-7.268	0.00306	-32.325	0.000138454	-33.0023	0.000262082		-5.97656	0.00405	-27.8335	0.000441941	-28.5015	0.00060982
	623	-0.0013	0.00245	-0.000448737													337731000000000	0.41368		337731000000000	0.88087		337731000000000	0.90991		-7.139	0.00478	-32.197	5.99009e-05	-32.8736	0.000101137		-5.852	0.00413	-27.6879	0.00044809	-28.3558	0.000616456
	624	-0.00138	0.00254	-0.000753436													339008000000000	0.41486		339008000000000	0.88183		339008000000000	0.91073		-7.01	0.00202	-32.068	0.000142883	-32.7448	0.00040399		-5.83098	0.00414	-27.5424	0.00045432	-28.2101	0.000623164
	625	-0.0013	0.00264	-0.000603857													340284000000000	0.41604		340284000000000	0.88277		340284000000000	0.91154		-6.882	0.00517	-31.939	0.000149663	-32.6161	0.000204396		-5.724	0.0042	-27.3969	0.000460631	-28.0645	0.000629943
	626	-0.0013	0.00226	-0.000753436													341561000000000	0.41721		341561000000000	0.88371		341561000000000	0.91234		-6.753	0.00596	-31.811	1.54886e-05	-32.4873	0.000101137		-5.6854	0.00423	-27.2513	0.000467026	-27.9188	0.000636796
	627	-0.00121	0.00226	-0.000603857													342838000000000	0.41839		342838000000000	0.88464		342838000000000	0.91313		-6.624	0.00357	-31.682	9.22245e-05	-32.3586	0.000378031		-5.53982	0.00431	-27.1058	0.000473505	-27.7731	0.000643723
	628	-0.00121	0.00217	-0.000603857													344115000000000	0.41956		344115000000000	0.88557		344115000000000	0.91392		-6.496	0.00549	-31.554	6.92535e-05	-32.2299	0.000241315		-5.39423	0.0044	-26.9603	0.00048007	-27.6274	0.000650726
	629	-0.00114	0.00198	-0.000603857													345392000000000	0.42073		345392000000000	0.88648		345392000000000	0.9147		-6.367	0.00318	-31.425	0.00014184	-32.1012	0.000249391		-5.24865	0.00449	-26.8147	0.000486722	-27.4818	0.000657804
	630	-0.00121	0.00198	-0.000753436													346669000000000	0.4219		346669000000000	0.88739		346669000000000	0.91547		-6.238	0.00422	-31.296	8.75532e-06	-31.9724	0.000167477		-5.10307	0.00458	-26.6692	0.000493463	-27.3361	0.000664959
	631	-0.0013	0.00208	-0.000299158													347945000000000	0.42307		347945000000000	0.8883		347945000000000	0.91624		-6.11	0.00405	-31.168	0.000206776	-31.8437	0.000188244		-4.95749	0.00467	-26.5236	0.000500294	-27.1904	0.000672192
	632	-0.00121	0.00198	-0.000448737													349222000000000	0.42423		349222000000000	0.88919		349222000000000	0.917		-5.981	0.00398	-31.039	0.00020086	-31.715	0.000262082		-4.81191	0.00477	-26.3781	0.000507217	-27.0447	0.000679505
	633	-0.00121	0.00179	-0.000149579													350499000000000	0.42539		350499000000000	0.89008		350499000000000	0.91775		-5.852	0.00511	-30.91	0.00012781	-31.5863	9.24845e-05		-4.66632	0.00486	-26.2326	0.000514234	-26.8991	0.000686897
	634	-0.0013	0.00179	-0.000448737													351776000000000	0.42655		351776000000000	0.89096		351776000000000	0.91849		-5.724	0.003	-30.782	6.87313e-05	-31.4576	0.00032496		-4.52074	0.00496	-26.0871	0.000521345	-26.7534	0.00069437
	635	-0.0013	0.0016	-0.000448737													353053000000000	0.42771		353053000000000	0.89183		353053000000000	0.91923		-5.595	0.00343	-30.653	0.000206965	-31.3289	0.000271889		-4.37516	0.00505	-25.9415	0.000528552	-26.6077	0.000701925
	636	-0.00114	0.00198	-0.000448737													354330000000000	0.42886		354330000000000	0.8927		354330000000000	0.91996		-5.467	0.00351	-30.525	4.81443e-05	-31.2002	0.000387261		-4.22958	0.00515	-25.796	0.000535858	-26.4621	0.000709564
	637	-0.00114	0.0017	-0.000448737													355606000000000	0.43001		355606000000000	0.89356		355606000000000	0.92069		-5.338	0.00462	-30.396	7.56431e-05	-31.0715	0.000183629		-4.084	0.00524	-25.6504	0.000543264	-26.3164	0.000717286
	638	-0.0008112	0.00179	-0.000753436													356883000000000	0.43116		356883000000000	0.89441		356883000000000	0.92141		-5.209	0.00641	-30.268	0.000187971	-30.9428	0.000407451		-3.93842	0.00534	-25.5049	0.000550771	-26.1707	0.000725093
	639	-0.0008112	0.00198	-0.000603857													358160000000000	0.43231		358160000000000	0.89526		358160000000000	0.92212		-5.081	0.00219	-30.139	0.000242857	-30.8141	0.000285157		-3.79283	0.00544	-25.3594	0.000558382	-26.025	0.000732987
	640	-0.000732	0.00217	-0.000903015													359437000000000	0.43345		359437000000000	0.8961		359437000000000	0.92282		-4.952	0.00435	-30.01	0.000136065	-30.6854	0.000212472		-3.64725	0.00553	-25.2138	0.000566097	-25.8793	0.000740968
	641	-0.0006528	0.00226	-0.00105													360714000000000	0.43459		360714000000000	0.89693		360714000000000	0.92352		-4.823	0.0077	-29.882	9.15972e-05	-30.5567	3.13371e-05		-3.50167	0.00563	-25.0683	0.000573919	-25.7337	0.000749037
	642	-0.0004872	0.00217	-0.00105													361991000000000	0.43573		361991000000000	0.89775		361991000000000	0.92422		-4.695	0.00474	-29.753	0.000147895	-30.428	0.000407451		-3.35609	0.00573	-24.9228	0.00058185	-25.588	0.000757196
	643	-0.0004872	0.00217	-0.000903015													363267000000000	0.43687		363267000000000	0.89857		363267000000000	0.9249		-4.566	0.00428	-29.625	0.000107461	-30.2993	0.000320345		-3.21051	0.00582	-24.7772	0.000589891	-25.4423	0.000765445
	644	-0.0004872	0.00217	-0.000603857													364544000000000	0.43801		364544000000000	0.89939		364544000000000	0.92558		-4.438	0.00658	-29.496	0.000238184	-30.1707	0.000162862		-3.06493	0.00592	-24.6317	0.000598045	-25.2966	0.000773786
	645	-0.000732	0.00208	-0.000753436													365821000000000	0.43914		365821000000000	0.90019		365821000000000	0.92626		-4.309	0.00498	-29.367	6.05165e-05	-30.042	5.2681e-05		-2.91934	0.00601	-24.4862	0.000606313	-25.151	0.000782219
	646	-0.000732	0.0017	-0.000753436													367098000000000	0.44027		367098000000000	0.90099		367098000000000	0.92693		-4.18	0.0029	-29.239	9.8444e-05	-29.9133	0.000403413		-2.895	0.00603	-24.3406	0.000614698	-25.0053	0.000790747
	647	-0.0009792	0.00151	-0.000603857													368375000000000	0.4414		368375000000000	0.90178		368375000000000	0.92759		-4.052	0.00368	-29.11	0.000173081	-29.7846	0.000249391		-2.77376	0.0061	-24.1951	0.000623201	-24.8596	0.00079937
	648	-0.0008928	0.00132	-0.000603857													369652000000000	0.44253		369652000000000	0.90257		369652000000000	0.92824		-3.923	0.00701	-28.982	0.000120422	-29.656	0.000380916		-2.766	0.00611	-24.0496	0.000631824	-24.714	0.000808089
	649	-0.0009792	0.00132	-0.000448737													370928000000000	0.44365		370928000000000	0.90335		370928000000000	0.92889		-3.795	0.0076	-28.853	0.000158607	-29.5273	0.000287464		-2.637	0.00619	-23.904	0.00064057	-24.5683	0.000816906
	650	-0.00106	0.00113	-0.000603857													372205000000000	0.44477		372205000000000	0.90413		372205000000000	0.92954		-3.666	0.00502	-28.725	0.000160115	-29.3986	0.00017613		-2.62818	0.00619	-23.7585	0.000649441	-24.4226	0.000825821
	651	-0.00106	0.00113	-0.000753436													373482000000000	0.44589		373482000000000	0.90489		373482000000000	0.93018		-3.537	0.00483	-28.596	0.00011821	-29.27	0.000423604		-2.509	0.00626	-23.613	0.000658438	-24.2769	0.000834836
	652	-0.00106	0.00113	-0.000753436													374759000000000	0.44701		374759000000000	0.90566		374759000000000	0.93081		-3.409	0.00506	-28.468	0.000165592	-29.1413	0.000421296		-2.4826	0.00628	-23.4674	0.000667565	-24.1313	0.000843952
	653	-0.0009792	0.00104	-0.000603857													376036000000000	0.44812		376036000000000	0.90641		376036000000000	0.93144		-3.28	0.00415	-28.339	0.000196403	-29.0127	0.000183629		-2.38	0.00634	-23.3219	0.000676823	-23.9856	0.000853171
	654	-0.0009792	0.00113	-0.000448737													377313000000000	0.44924		377313000000000	0.90716		377313000000000	0.93206		-3.152	0.00783	-28.211	0.000255398	-28.884	0.000346304		-2.33702	0.00637	-23.1763	0.000686215	-23.8399	0.000862493
	655	-0.0009792	0.00104	-0.000603857													378589000000000	0.45035		378589000000000	0.90791		378589000000000	0.93267		-3.023	0.0065	-28.082	0.000104213	-28.7554	0.000174976		-2.252	0.00642	-23.0308	0.000695743	-23.6942	0.000871921
	656	-0.0009792	0.000945634	-0.000448737													379866000000000	0.45146		379866000000000	0.90864		379866000000000	0.93328		-2.895	0.00472	-27.953	0.000206718	-28.6267	0.000421873		-2.19143	0.00645	-22.8853	0.000705409	-23.5485	0.000881454
	657	-0.0008928	0.00104	-0.000753436													381143000000000	0.45256		381143000000000	0.90938		381143000000000	0.93389		-2.766	0.00641	-27.825	0.000179543	-28.4981	0.000215933		-2.123	0.00649	-22.7397	0.000715216	-23.4029	0.000891095
	658	-0.0009792	0.00104	-0.000753436													382420000000000	0.45367		382420000000000	0.9101		382420000000000	0.93448		-2.637	0.00482	-27.696	0.000116824	-28.3694	0.000576472		-2.04585	0.00653	-22.5942	0.000725167	-23.2572	0.000900844
	659	-0.0009792	0.00113	-0.000603857													383697000000000	0.45477		383697000000000	0.91082		383697000000000	0.93508		-2.509	0.00472	-27.568	0.000230114	-28.2408	0.000336497		-1.995	0.00656	-22.4487	0.000735263	-23.1115	0.000910703
	660	-0.0009792	0.00113	-0.000603857													384973000000000	0.45587		384973000000000	0.91154		384973000000000	0.93567		-2.38	0.00764	-27.439	0.000127286	-28.1122	0.000574741		-1.90027	0.00661	-22.3031	0.000745509	-22.9658	0.000920674
	661	-0.0008928	0.00113	-0.00105													386250000000000	0.45696		386250000000000	0.91224		386250000000000	0.93625		-2.252	0.00743	-27.311	0.000103903	-27.9835	0.000316884		-1.866	0.00663	-22.1576	0.000755905	-22.8202	0.000930757
	662	-0.0009792	0.00113	-0.000753436													387527000000000	0.45806		387527000000000	0.91295		387527000000000	0.93683		-2.123	0.00794	-27.182	0.000225348	-27.8549	0.000170361		-1.75469	0.00669	-22.0121	0.000766456	-22.6745	0.000940955
	663	-0.0008928	0.00113	-0.000903015													388804000000000	0.45915		388804000000000	0.91365		388804000000000	0.9374		-1.995	0.00778	-27.054	0.000136844	-27.7263	0.000678		-1.738	0.00669	-21.8665	0.000777163	-22.5288	0.000951267
	664	-0.000732	0.00104	-0.00121													390081000000000	0.46024		390081000000000	0.91434		390081000000000	0.93797		-1.866	0.00794	-26.925	0.00018559	-27.5977	0.000333036		-1.60911	0.00676	-21.721	0.000788029	-22.3832	0.000961696
	665	-0.0008112	0.00113	-0.00105													391358000000000	0.46133		391358000000000	0.91502		391358000000000	0.93853		-1.738	0.00859	-26.797	0.000253521	-27.469	0.000264966		-1.609	0.00676	-21.5755	0.000799058	-22.2375	0.000972243
	666	-0.0008112	0.000845495	-0.00105													392634000000000	0.46242		392634000000000	0.9157		392634000000000	0.93908		-1.609	0.00554	-26.668	0.000103541	-27.3404	0.000346881		-1.48	0.00682	-21.4299	0.000810253	-22.0918	0.00098291
	667	-0.0008112	0.000845495	-0.00121													393911000000000	0.4635		393911000000000	0.91638		393911000000000	0.93964		-1.48	0.00795	-26.54	0.000342287	-27.2118	0.000511287		-1.46353	0.00683	-21.2844	0.000821615	-21.9461	0.000993697
	668	-0.0008112	0.000845495	-0.00105													395188000000000	0.46458		395188000000000	0.91705		395188000000000	0.94018		-1.352	0.00923	-26.411	0.000214766	-27.0832	0.00036534		-1.352	0.00688	-21.1389	0.000833149	-21.8005	0.001
	669	-0.000732	0.00104	-0.00121													396465000000000	0.46566		396465000000000	0.91771		396465000000000	0.94073		-1.223	0.00432	-26.283	0.000201508	-26.9546	0.000179014		-1.31794	0.00689	-20.9933	0.000844857	-21.6548	0.00102
	670	-0.000732	0.000945634	-0.00121													397742000000000	0.46674		397742000000000	0.91837		397742000000000	0.94126		-1.095	0.0064	-26.154	0.00021062	-26.826	0.000424757		-1.223	0.00693	-20.8478	0.000856743	-21.5091	0.00103
	671	-0.0005664	0.000845495	-0.00136													399019000000000	0.46782		399019000000000	0.91903		399019000000000	0.94179		-0.966	0.00543	-26.026	0.000159468	-26.6974	0.000435141		-1.17236	0.00695	-20.7022	0.000868809	-21.3634	0.00104
	672	-0.0006528	0.00104	-0.00105													400295000000000	0.46889		400295000000000	0.91968		400295000000000	0.94232		-0.838	0.00817	-25.897	0.000252605	-26.5688	0.000364764		-1.095	0.00698	-20.5567	0.000881059	-21.2178	0.00105
	673	-0.0005664	0.000845495	-0.00121													401572000000000	0.46996		401572000000000	0.92032		401572000000000	0.94284		-0.709	0.00868	-25.769	0.00021452	-26.4402	0.000532054		-1.02678	0.00701	-20.4112	0.000893497	-21.0721	0.00106
	674	-0.000408	0.000845495	-0.00105													402849000000000	0.47103		402849000000000	0.92096		402849000000000	0.94336		-0.581	0.00827	-25.64	0.000278087	-26.3116	0.000331306		-0.966	0.00703	-20.2657	0.000906125	-20.9264	0.00107
	675	-0.000408	0.000845495	-0.00105													404126000000000	0.47209		404126000000000	0.92159		404126000000000	0.94387		-0.452	0.00675	-25.512	0.000367543	-26.183	0.0007478		-0.8812	0.00706	-20.1201	0.000918948	-20.7807	0.00108
	676	-0.000324	0.000945634	-0.00105													405403000000000	0.47316		405403000000000	0.92222		405403000000000	0.94438		-0.324	0.00441	-25.383	0.000114715	-26.0544	0.000229201		-0.838	0.00707	-19.9746	0.000931968	-20.6351	0.0011
	677	-0.000408	0.000845495	-0.00136													406680000000000	0.47422		406680000000000	0.92284		406680000000000	0.94489		-0.195	0.00928	-25.255	0.000262136	-25.9258	0.00027535		-0.73562	0.0071	-19.829	0.000945189	-20.4894	0.00111
	678	-0.000324	0.000753321	-0.000903015													407956000000000	0.47528		407956000000000	0.92346		407956000000000	0.94539		-0.067	0.00772	-25.126	0.000238047	-25.7972	0.000529169		-0.709	0.00711	-19.6835	0.000958615	-20.3437	0.00112
	679	-0.0002424	0.000845495	-0.00121													409233000000000	0.47634		409233000000000	0.92407		409233000000000	0.94588		0.062	0.00867	-24.998	0.000268224	-25.6687	0.000608776		-0.59004	0.00714	-19.538	0.000972249	-20.198	0.00113
	680	-0.000324	0.000945634	-0.000903015													410510000000000	0.4774		410510000000000	0.92468		410510000000000	0.94637		0.19	0.00668	-24.87	0.000231712	-25.5401	0.000559743		-0.581	0.00714	-19.3924	0.000986096	-20.0524	0.00115
	681	-0.0002424	0.000945634	-0.00136													411787000000000	0.47845		411787000000000	0.92528		411787000000000	0.94686		0.319	0.00621	-24.741	0.000292239	-25.4115	0.000449562		-0.452	0.00718	-19.2469	0.001	-19.9067	0.00116
	682	-0.000324	0.000660009	-0.000903015													413064000000000	0.4795		413064000000000	0.92588		413064000000000	0.94734		0.447	0.00507	-24.613	0.000198012	-25.2829	0.000538976		-0.44445	0.00718	-19.1014	0.00101	-19.761	0.00117
	683	-0.000408	0.000566698	-0.000753436													414341000000000	0.48055		414341000000000	0.92648		414341000000000	0.94782		0.576	0.0098	-24.484	0.000252323	-25.1544	0.000380916		-0.324	0.0072	-18.9558	0.00103	-19.6153	0.00118
	684	-0.0002424	0.000566698	-0.00105													415617000000000	0.4816		415617000000000	0.92707		415617000000000	0.94829		0.704	0.00486	-24.356	0.000395189	-25.0258	0.000576472		-0.29887	0.00721	-18.8103	0.00104	-19.4697	0.0012
	685	-0.0002424	0.000374385	-0.000903015													416894000000000	0.48264		416894000000000	0.92765		416894000000000	0.94876		0.833	0.0084	-24.227	0.000259954	-24.8972	0.000367071		-0.195	0.00722	-18.6648	0.00106	-19.324	0.00121
	686	-0.000324	0.000660009	-0.00105													418171000000000	0.48369		418171000000000	0.92823		418171000000000	0.94922		0.961	0.00793	-24.099	0.00025443	-24.7687	0.00058974		-0.15329	0.00723	-18.5192	0.00107	-19.1783	0.00122
	687	-0.0002424	0.000566698	-0.000753436													419448000000000	0.48473		419448000000000	0.92881		419448000000000	0.94968		1.09	0.00757	-23.97	0.000424001	-24.6401	0.000289195		-0.067	0.00724	-18.3737	0.00109	-19.0326	0.00124
	688	-0.000408	0.000374385	-0.000903015													420725000000000	0.48577		420725000000000	0.92938		420725000000000	0.95014		1.218	0.00821	-23.842	0.000500503	-24.5116	0.000504364		-0.00771	0.00725	-18.2282	0.0011	-18.887	0.00125
	689	-0.0002424	0.000374385	-0.000903015													422002000000000	0.4868		422002000000000	0.92994		422002000000000	0.95059		1.347	0.00875	-23.714	0.000357223	-24.383	0.000560897		0.062	0.00726	-18.0826	0.00112	-18.7413	0.00126
	690	-0.0002424	0.000374385	-0.00105													423278000000000	0.48784		423278000000000	0.9305		423278000000000	0.95104		1.475	0.0062	-23.585	0.000179322	-24.2545	0.000849905		0.13787	0.00726	-17.9371	0.00114	-18.5956	0.00128
	691	-0.0002424	0.000467696	-0.000903015													424555000000000	0.48887		424555000000000	0.93106		424555000000000	0.95148		1.604	0.00541	-23.457	0.000378157	-24.1259	0.000516478		0.19	0.00726	-17.7916	0.00115	-18.4499	0.00129
	692	-0.000324	0.000374385	-0.00105													425832000000000	0.4899		425832000000000	0.93161		425832000000000	0.95192		1.732	0.00528	-23.328	0.000312481	-23.9974	0.000528016		0.28345	0.00727	-17.646	0.00117	-18.3043	0.00131
	693	-0.0002424	0.000282211	-0.000903015													427109000000000	0.49093		427109000000000	0.93216		427109000000000	0.95235		1.861	0.00502	-23.2	0.00028327	-23.8689	0.000614545		0.319	0.00727	-17.5005	0.00119	-18.1586	0.00132
	694	-0.000163287	0.000282211	-0.000753436													428386000000000	0.49196		428386000000000	0.9327		428386000000000	0.95279		1.989	0.00657	-23.071	0.000372585	-23.7403	0.000830868		0.42904	0.00727	-17.3549	0.0012	-18.0129	0.00134
	695	-0.0002424	0.000282211	-0.000603857													429663000000000	0.49298		429663000000000	0.93324		429663000000000	0.95321		2.117	0.00663	-22.943	0.000307743	-23.6118	0.000669347		0.447	0.00727	-17.2094	0.00122	-17.8672	0.00135
	696	-0.000163287	9.28226e-05	-0.000753436													430939000000000	0.494		430939000000000	0.93378		430939000000000	0.95364		2.246	0.00729	-22.815	0.000382076	-23.4833	0.000378608		0.57462	0.00726	-17.0639	0.00124	-17.7216	0.00137
	697	-8.41176e-05	9.28226e-05	-0.000448737													432216000000000	0.49502		432216000000000	0.93431		432216000000000	0.95406		2.374	0.00622	-22.686	0.000267555	-23.3547	0.000825677		0.576	0.00726	-16.9183	0.00126	-17.5759	0.00138
	698	-0.000163287	0.000188899	-0.000603857													433493000000000	0.49604		433493000000000	0.93483		433493000000000	0.95447		2.503	0.00587	-22.558	0.000422159	-23.2262	0.000702228		0.704	0.00725	-16.7728	0.00128	-17.4302	0.0014
	699	-8.41176e-05	9.28226e-05	-0.000448737													434770000000000	0.49706		434770000000000	0.93536		434770000000000	0.95489		2.631	0.00842	-22.429	0.000529138	-23.0977	0.000959509		0.7202	0.00725	-16.6273	0.0013	-17.2845	0.00141
	700	0	0	0													436047000000000	0.49807		436047000000000	0.93587		436047000000000	0.9553		2.76	0.00555	-22.301	0.000363036	-22.9692	0.000473214		0.833	0.00724	-16.4817	0.00131	-17.1389	0.00143
	701																437324000000000	0.49908		437324000000000	0.93639		437324000000000	0.9557		2.888	0.00634	-22.173	0.000401175	-22.8407	0.000682038		0.86578	0.00724	-16.3362	0.00133	-16.9932	0.00144
	702																438600000000000	0.50009		438600000000000	0.9369		438600000000000	0.9561		3.017	0.00602	-22.044	0.000447769	-22.7121	0.000720111		0.961	0.00722	-16.1907	0.00135	-16.8475	0.00146
	703																439877000000000	0.5011		439877000000000	0.9374		439877000000000	0.9565		3.145	0.00715	-21.916	0.000435169	-22.5836	0.000720688		1.01136	0.00721	-16.0451	0.00137	-16.7019	0.00147
	704																441154000000000	0.50211		441154000000000	0.9379		441154000000000	0.95689		3.273	0.00744	-21.787	0.000437025	-22.4551	0.000928935		1.09	0.0072	-15.8996	0.00139	-16.5562	0.00149
	705																442431000000000	0.50311		442431000000000	0.9384		442431000000000	0.95728		3.402	0.0055	-21.659	0.000643698	-22.3266	0.000941626		1.15695	0.00719	-15.7541	0.00141	-16.4105	0.00151
	706																443708000000000	0.50411		443708000000000	0.93889		443708000000000	0.95767		3.53	0.00682	-21.531	0.000467784	-22.1981	0.000818754		1.218	0.00717	-15.6085	0.00143	-16.2648	0.00152
	707																444985000000000	0.50511		444985000000000	0.93938		444985000000000	0.95805		3.659	0.00403	-21.402	0.000405327	-22.0696	0.000877594		1.30253	0.00715	-15.463	0.00146	-16.1192	0.00154
	708																446261000000000	0.50611		446261000000000	0.93987		446261000000000	0.95843		3.787	0.00653	-21.274	0.000508199	-21.9411	0.000818177		1.347	0.00714	-15.3175	0.00148	-15.9735	0.00156
	709																447538000000000	0.50711		447538000000000	0.94035		447538000000000	0.95881		3.916	0.00651	-21.145	0.000734793	-21.8126	0.000495134		1.44811	0.00711	-15.1719	0.0015	-15.8278	0.00157
	710																448815000000000	0.5081		448815000000000	0.94083		448815000000000	0.95918		4.044	0.00498	-21.017	0.000270931	-21.6841	0.000937011		1.475	0.0071	-15.0264	0.00152	-15.6821	0.00159
	711																450092000000000	0.50909		450092000000000	0.9413		450092000000000	0.95955		4.172	0.00486	-20.889	0.000491017	-21.5557	0.000696459		1.59369	0.00707	-14.8809	0.00154	-15.5365	0.00161
	712																451369000000000	0.51008		451369000000000	0.94177		451369000000000	0.95992		4.301	0.00476	-20.76	0.000399527	-21.4272	0.000720688		1.604	0.00706	-14.7353	0.00157	-15.3908	0.00163
	713																452646000000000	0.51107		452646000000000	0.94224		452646000000000	0.96028		4.429	0.00389	-20.632	0.000609911	-21.2987	0.000837214		1.732	0.00702	-14.5898	0.00159	-15.2451	0.00164
	714																453922000000000	0.51206		453922000000000	0.9427		453922000000000	0.96064		4.558	0.00677	-20.504	0.00071271	-21.1702	0.000568973		1.73927	0.00702	-14.4443	0.00161	-15.0994	0.00166
	715																455199000000000	0.51304		455199000000000	0.94316		455199000000000	0.961		4.686	0.00593	-20.375	0.000499881	-21.0418	0.00111		1.861	0.00697	-14.2987	0.00164	-14.9537	0.00168
	716																456476000000000	0.51402		456476000000000	0.94362		456476000000000	0.96135		4.814	0.00447	-20.247	0.000540184	-20.9133	0.000961239		1.88485	0.00696	-14.1532	0.00166	-14.8081	0.0017
	717																457753000000000	0.515		457753000000000	0.94407		457753000000000	0.9617		4.943	0.00663	-20.119	0.000617944	-20.7848	0.000987775		1.989	0.00692	-14.0076	0.00169	-14.6624	0.00172
	718																459030000000000	0.51598		459030000000000	0.94452		459030000000000	0.96205		5.071	0.00368	-19.99	0.000659407	-20.6563	0.000770875		2.03044	0.00691	-13.8621	0.00171	-14.5167	0.00174
	719																460307000000000	0.51696		460307000000000	0.94496		460307000000000	0.96239		5.2	0.00372	-19.862	0.000836082	-20.5279	0.00105		2.117	0.00687	-13.7166	0.00174	-14.3711	0.00175
	720																461583000000000	0.51793		461583000000000	0.9454		461583000000000	0.96273		5.328	0.00516	-19.733	0.000873747	-20.3994	0.000618583		2.17602	0.00684	-13.571	0.00177	-14.2254	0.00177
	721																462860000000000	0.5189		462860000000000	0.94584		462860000000000	0.96307		5.456	0.0037	-19.605	0.000457549	-20.271	0.000727033		2.246	0.00681	-13.4255	0.00179	-14.0797	0.00179
	722																464137000000000	0.51987		464137000000000	0.94627		464137000000000	0.96341		5.585	0.0066	-19.477	0.00103	-20.1425	0.00091509		2.3216	0.00678	-13.28	0.00182	-13.934	0.00181
	723																465414000000000	0.52084		465414000000000	0.9467		465414000000000	0.96374		5.713	0.00206	-19.348	0.000659827	-20.0141	0.00111		2.374	0.00675	-13.1344	0.00185	-13.7883	0.00183
	724																466691000000000	0.52181		466691000000000	0.94713		466691000000000	0.96407		5.841	0.00505	-19.22	0.000745327	-19.8856	0.00115		2.46718	0.00671	-12.9889	0.00187	-13.6427	0.00185
	725																467968000000000	0.52277		467968000000000	0.94755		467968000000000	0.96439		5.97	0.0039	-19.092	0.000525423	-19.7572	0.00114		2.503	0.00669	-12.8434	0.0019	-13.497	0.00187
	726																469244000000000	0.52373		469244000000000	0.94797		469244000000000	0.96471		6.098	0.00473	-18.963	0.000741977	-19.6287	0.0013		2.61276	0.00663	-12.6978	0.00193	-13.3513	0.00189
	727																470521000000000	0.52469		470521000000000	0.94839		470521000000000	0.96503		6.226	0.00625	-18.835	0.000693617	-19.5003	0.00106		2.631	0.00662	-12.5523	0.00196	-13.2057	0.00191
	728																471798000000000	0.52565		471798000000000	0.94881		471798000000000	0.96535		6.355	0.00546	-18.707	0.000862451	-19.3718	0.000975661		2.75834	0.00655	-12.4068	0.00199	-13.06	0.00193
	729																473075000000000	0.52661		473075000000000	0.94922		473075000000000	0.96566		6.483	0.00507	-18.579	0.000740515	-19.2434	0.00136		2.76	0.00655	-12.2612	0.00202	-12.9143	0.00195
	730																474352000000000	0.52756		474352000000000	0.94962		474352000000000	0.96598		6.612	0.00405	-18.45	0.000933972	-19.115	0.000700497		2.888	0.00648	-12.1157	0.00205	-12.7686	0.00197
	731																475629000000000	0.52852		475629000000000	0.95003		475629000000000	0.96628		6.74	0.00315	-18.322	0.000810747	-18.9866	0.00132		2.90393	0.00647	-11.9702	0.00208	-12.623	0.00199
	732																476905000000000	0.52947		476905000000000	0.95043		476905000000000	0.96659		6.868	0.00364	-18.194	0.000876058	-18.8581	0.00122		3.017	0.00641	-11.8246	0.00211	-12.4773	0.00202
	733																478182000000000	0.53041		478182000000000	0.95082		478182000000000	0.96689		6.997	0.00428	-18.065	0.000917893	-18.7297	0.000881055		3.04951	0.00639	-11.6791	0.00215	-12.3316	0.00204
	734																479459000000000	0.53136		479459000000000	0.95122		479459000000000	0.96719		7.125	0.00387	-17.937	0.000848722	-18.6013	0.00119		3.145	0.00633	-11.5335	0.00218	-12.1859	0.00206
	735																480736000000000	0.53231		480736000000000	0.95161		480736000000000	0.96749		7.253	0.00393	-17.809	0.000934139	-18.4729	0.00101		3.19509	0.0063	-11.388	0.00221	-12.0403	0.00208
	736																482013000000000	0.53325		482013000000000	0.952		482013000000000	0.96778		7.382	0.00193	-17.68	0.000818543	-18.3445	0.00126		3.273	0.00626	-11.269	0.00224	-11.8946	0.0021
	737																483289000000000	0.53419		483289000000000	0.95238		483289000000000	0.96807		7.51	0.00317	-17.552	0.00109	-18.2161	0.00116		3.34067	0.00622	-11.2425	0.00224	-11.7489	0.00212
	738																484566000000000	0.53513		484566000000000	0.95276		484566000000000	0.96836		7.638	0.00466	-17.424	0.000912274	-18.0877	0.00115		3.402	0.00618	-11.141	0.00227	-11.6032	0.00215
	739																485843000000000	0.53607		485843000000000	0.95314		485843000000000	0.96865		7.767	0.00439	-17.296	0.0011	-17.9593	0.00135		3.48625	0.00613	-11.0969	0.00228	-11.4576	0.00217
	740																487120000000000	0.537		487120000000000	0.95352		487120000000000	0.96893		7.895	0.00204	-17.167	0.000680381	-17.8308	0.00127		3.53	0.0061	-11.013	0.0023	-11.3119	0.00219
	741																488397000000000	0.53794		488397000000000	0.95389		488397000000000	0.96922		8.023	0.00177	-17.039	0.0012	-17.7024	0.00159		3.63184	0.00603	-10.9514	0.00231	-11.1662	0.00221
	742																489674000000000	0.53887		489674000000000	0.95426		489674000000000	0.9695		8.152	0.00321	-16.911	0.000828366	-17.574	0.00142		3.659	0.00602	-10.885	0.00233	-11.0205	0.00224
	743																490950000000000	0.5398		490950000000000	0.95462		490950000000000	0.96977		8.28	0.00235	-16.782	0.00139	-17.4457	0.00114		3.77742	0.00594	-10.8059	0.00235	-10.8749	0.00226
	744																492227000000000	0.54073		492227000000000	0.95499		492227000000000	0.97005		8.408	0.00528	-16.654	0.000966284	-17.3173	0.00118		3.923	0.00585	-10.757	0.00236	-10.7292	0.00228
	745																493504000000000	0.54165		493504000000000	0.95535		493504000000000	0.97032		8.537	0.00355	-16.526	0.00131	-17.1889	0.00127		4.06858	0.00575	-10.6603	0.00238	-10.5835	0.0023
	746																494781000000000	0.54258		494781000000000	0.95571		494781000000000	0.97059		8.665	0.00253	-16.398	0.00107	-17.0605	0.00133		4.21416	0.00566	-10.629	0.00239	-10.4378	0.00233
	747																496058000000000	0.5435		496058000000000	0.95606		496058000000000	0.97085		8.793	0.00389	-16.269	0.00095779	-16.9321	0.00152		4.35974	0.00556	-10.5148	0.00242	-10.2922	0.00235
	748																497335000000000	0.54442		497335000000000	0.95641		497335000000000	0.97112		8.921	0.00317	-16.141	0.00083778	-16.8037	0.00139		4.50533	0.00546	-10.501	0.00242	-10.1465	0.00237
	749																498611000000000	0.54534		498611000000000	0.95676		498611000000000	0.97138		9.05	0.00423	-16.013	0.0012	-16.6754	0.0017		4.65091	0.00537	-10.372	0.00245	-10.0008	0.0024
	750																499888000000000	0.54625		499888000000000	0.95711		499888000000000	0.97164		9.178	0.00217	-15.885	0.00107	-16.547	0.00143		4.79649	0.00527	-10.3693	0.00246	-9.85514	0.00242
	751																501165000000000	0.54717		501165000000000	0.95745		501165000000000	0.97189		9.306	0.00393	-15.756	0.00112	-16.4186	0.00138		4.94207	0.00517	-10.244	0.00249	-9.70947	0.00244
	752																502442000000000	0.54808		502442000000000	0.95779		502442000000000	0.97215		9.435	0.00244	-15.628	0.00104	-16.2903	0.00143		5.08765	0.00508	-10.2237	0.00249	-9.56379	0.00247
	753																503719000000000	0.54899		503719000000000	0.95813		503719000000000	0.9724		9.563	0.00262	-15.5	0.00155	-16.1619	0.00179		5.23323	0.00498	-10.116	0.00252	-9.41812	0.00249
	754																504996000000000	0.5499		504996000000000	0.95847		504996000000000	0.97265		9.691	0.00277	-15.372	0.00149	-16.0335	0.00178		5.37882	0.00489	-10.0782	0.00253	-9.27244	0.00252
	755																506272000000000	0.55081		506272000000000	0.9588		506272000000000	0.9729		9.819	0.000307855	-15.243	0.00143	-15.9052	0.00136		5.5244	0.00479	-9.988	0.00255	-9.12677	0.00254
	756																507549000000000	0.55172		507549000000000	0.95913		507549000000000	0.97314		9.948	0.00336	-15.115	0.00133	-15.7768	0.00196		5.66998	0.0047	-9.93266	0.00257	-8.98109	0.00256
	757																508826000000000	0.55262		508826000000000	0.95946		508826000000000	0.97339		10.076	0.00165	-14.987	0.000851113	-15.6485	0.00149		5.81556	0.00461	-9.86	0.00259	-8.83542	0.00259
	758																510103000000000	0.55352		510103000000000	0.95978		510103000000000	0.97363		10.204	0.00288	-14.859	0.00166	-15.5201	0.00162		5.96114	0.00452	-9.78712	0.00261	-8.68974	0.00261
	759																511380000000000	0.55442		511380000000000	0.9601		511380000000000	0.97387		10.333	0.00136	-14.73	0.00131	-15.3918	0.00147		6.10673	0.00442	-9.64159	0.00264	-8.54407	0.00264
	760																512657000000000	0.55532		512657000000000	0.96042		512657000000000	0.9741		10.461	0.00274	-14.602	0.00163	-15.2634	0.00185		6.25231	0.00434	-9.49605	0.00268	-8.39839	0.00266
	761																513933000000000	0.55622		513933000000000	0.96074		513933000000000	0.97434		10.589	0.00324	-14.474	0.00123	-15.1351	0.0014		6.39789	0.00425	-9.35052	0.00272	-8.25272	0.00269
	762																515210000000000	0.55711		515210000000000	0.96105		515210000000000	0.97457		10.717	0.00378	-14.346	0.00131	-15.0068	0.0018		6.483	0.0042	-9.20498	0.00276	-8.10704	0.00271
	763																516487000000000	0.55801		516487000000000	0.96137		516487000000000	0.9748		10.846	0.00153	-14.218	0.00184	-14.8784	0.00166		6.54347	0.00416	-9.05945	0.0028	-7.96137	0.00273
	764																517764000000000	0.5589		517764000000000	0.96168		517764000000000	0.97503		10.974	0.00221	-14.089	0.00138	-14.7501	0.00191		6.612	0.00412	-8.91391	0.00285	-7.8157	0.00276
	765																519041000000000	0.55979		519041000000000	0.96198		519041000000000	0.97526		11.102	0.00203	-13.961	0.00165	-14.6218	0.00166		6.68905	0.00408	-8.76838	0.00289	-7.67002	0.00278
	766																520318000000000	0.56067		520318000000000	0.96229		520318000000000	0.97548		11.23	0.00129	-13.833	0.00179	-14.4934	0.00124		6.74	0.00405	-8.62284	0.00293	-7.52435	0.00281
	767																521594000000000	0.56156		521594000000000	0.96259		521594000000000	0.9757		11.359	0.00361	-13.705	0.00169	-14.3651	0.00207		6.83463	0.00399	-8.47731	0.00297	-7.37867	0.00283
	768																522871000000000	0.56244		522871000000000	0.96289		522871000000000	0.97592		11.487	0.00261	-13.576	0.00179	-14.2368	0.00173		6.868	0.00397	-8.33177	0.00302	-7.233	0.00285
	769																524148000000000	0.56333		524148000000000	0.96319		524148000000000	0.97614		11.615	0.00232	-13.448	0.0015	-14.1085	0.00177		6.98022	0.00391	-8.18624	0.00306	-7.08732	0.00288
	770																525425000000000	0.56421		525425000000000	0.96348		525425000000000	0.97636		11.743	0.000588816	-13.32	0.00158	-13.9802	0.00216		6.997	0.0039	-8.0407	0.0031	-6.94165	0.0029
	771																526702000000000	0.56509		526702000000000	0.96377		526702000000000	0.97657		11.871	0.00232	-13.192	0.00187	-13.8519	0.00158		7.125	0.00383	-7.89517	0.00315	-6.79597	0.00293
	772																527979000000000	0.56596		527979000000000	0.96406		527979000000000	0.97678		12	0.00362	-13.064	0.00156	-13.7236	0.00209		7.1258	0.00383	-7.74963	0.00319	-6.6503	0.00295
	773																529255000000000	0.56684		529255000000000	0.96435		529255000000000	0.97699		12.128	0.00113	-12.936	0.00153	-13.5953	0.00197		7.253	0.00376	-7.6041	0.00324	-6.50462	0.00297
	774																530532000000000	0.56771		530532000000000	0.96464		530532000000000	0.9772		12.256	0.00155	-12.807	0.00169	-13.467	0.00214		7.27138	0.00375	-7.45856	0.00328	-6.35895	0.003
	775																531809000000000	0.56858		531809000000000	0.96492		531809000000000	0.97741		12.384	0.00187	-12.679	0.00172	-13.3387	0.00219		7.382	0.00369	-7.31303	0.00333	-6.21327	0.00302
	776																533086000000000	0.56945		533086000000000	0.9652		533086000000000	0.97761		12.513	0.00189	-12.551	0.00148	-13.2104	0.00177		7.41696	0.00367	-7.16749	0.00337	-6.0676	0.00304
	777																534363000000000	0.57032		534363000000000	0.96548		534363000000000	0.97782		12.641	0.0013	-12.423	0.00178	-13.0821	0.0018		7.51	0.00362	-7.02196	0.00342	-5.92193	0.00307
	778																535640000000000	0.57119		535640000000000	0.96576		535640000000000	0.97802		12.769	0.00132	-12.295	0.00191	-12.9538	0.00244		7.56254	0.00359	-6.87642	0.00346	-5.77625	0.00309
	779																536916000000000	0.57205		536916000000000	0.96603		536916000000000	0.97822		12.897	0.00107	-12.166	0.00165	-12.8255	0.00243		7.638	0.00355	-6.73089	0.00351	-5.64622	0.00311
	780																538193000000000	0.57291		538193000000000	0.9663		538193000000000	0.97841		13.025	0.00146	-12.038	0.0016	-12.6972	0.00187		7.70812	0.00352	-6.58535	0.00356	-5.63058	0.00311
	781																539470000000000	0.57378		539470000000000	0.96657		539470000000000	0.97861		13.154	0.00166	-11.91	0.00193	-12.5689	0.00205		7.767	0.00349	-6.43982	0.0036	-5.51811	0.00313
	782																540747000000000	0.57463		540747000000000	0.96684		540747000000000	0.9788		13.282	0.00103	-11.782	0.00188	-12.4407	0.00242		7.85371	0.00345	-6.29428	0.00365	-5.4849	0.00313
	783																542024000000000	0.57549		542024000000000	0.96711		542024000000000	0.97899		13.41	0.00158	-11.654	0.00221	-12.3124	0.00246		7.895	0.00342	-6.14875	0.0037	-5.38999	0.00315
	784																543301000000000	0.57635		543301000000000	0.96737		543301000000000	0.97918		13.538	0.00136	-11.526	0.00203	-12.1841	0.00229		7.99929	0.00337	-6.00321	0.00375	-5.33923	0.00315
	785																544577000000000	0.5772		544577000000000	0.96763		544577000000000	0.97937		13.666	0.00117	-11.398	0.00212	-12.0558	0.00231		8.023	0.00336	-5.85768	0.00379	-5.26188	0.00317
	786																545854000000000	0.57806		545854000000000	0.96789		545854000000000	0.97956		13.795	0.00162	-11.269	0.00267	-11.9276	0.00233		8.14487	0.0033	-5.71214	0.00384	-5.19355	0.00318
	787																547131000000000	0.57891		547131000000000	0.96815		547131000000000	0.97975		13.923	0.0025	-11.141	0.00226	-11.7993	0.00278		8.152	0.0033	-5.56661	0.00389	-5.13377	0.00319
	788																548408000000000	0.57976		548408000000000	0.9684		548408000000000	0.97993		14.051	0.00159	-11.013	0.00224	-11.6711	0.0022		8.28	0.00324	-5.42107	0.00393	-5.04788	0.0032
	789																549685000000000	0.5806		549685000000000	0.96866		549685000000000	0.98011		14.179	0.00283	-10.885	0.00214	-11.5428	0.00256		8.29045	0.00323	-5.27554	0.00398	-5.00567	0.0032
	790																550962000000000	0.58145		550962000000000	0.96891		550962000000000	0.98029		14.307	0.00178	-10.757	0.00269	-11.4146	0.00235		8.408	0.00318	-5.13	0.00403	-4.9022	0.00322
	791																552238000000000	0.58229		552238000000000	0.96916		552238000000000	0.98047		14.435	0.000922047	-10.629	0.00243	-11.2863	0.00242		8.43603	0.00317	-4.98447	0.00407	-4.87757	0.00322
	792																553515000000000	0.58313		553515000000000	0.9694		553515000000000	0.98065		14.564	0.00302	-10.501	0.00289	-11.158	0.00267		8.537	0.00312	-4.83893	0.00412	-4.75653	0.00324
	793																554792000000000	0.58397		554792000000000	0.96965		554792000000000	0.98082		14.692	0.00208	-10.372	0.00241	-11.0298	0.00224		8.58162	0.0031	-4.6934	0.00416	-4.74947	0.00324
	794																556069000000000	0.58481		556069000000000	0.96989		556069000000000	0.981		14.82	0.00194	-10.244	0.00261	-10.9016	0.00225		8.665	0.00306	-4.54786	0.00421	-4.62137	0.00326
	795																557346000000000	0.58565		557346000000000	0.97013		557346000000000	0.98117		14.948	0.00118	-10.116	0.00282	-10.7733	0.00247		8.7272	0.00303	-4.482	0.00423	-4.61085	0.00326
	796																558623000000000	0.58649		558623000000000	0.97037		558623000000000	0.98134		15.076	0.00316	-9.988	0.00259	-10.6451	0.00281		8.793	0.003	-4.40233	0.00425	-4.49328	0.00328
	797																559899000000000	0.58732		559899000000000	0.97061		559899000000000	0.98151		15.204	0.000231119	-9.86	0.00314	-10.5169	0.0029		8.87278	0.00297	-4.354	0.00427	-4.46518	0.00328
	798																561176000000000	0.58815		561176000000000	0.97085		561176000000000	0.98167		15.333	0.00126	-9.732	0.00335	-10.3886	0.0023		8.921	0.00295	-4.25679	0.0043	-4.36519	0.0033
	799																562453000000000	0.58898		562453000000000	0.97108		562453000000000	0.98184		15.461	0.00215	-9.604	0.00215	-10.2604	0.00228		9.01836	0.00291	-4.226	0.00431	-4.3195	0.0033
	800																563730000000000	0.58981		563730000000000	0.97131		563730000000000	0.982		15.589	0.00128	-9.476	0.00339	-10.1322	0.00224		9.05	0.00289	-4.11126	0.00434	-4.2371	0.00331
	801																565007000000000	0.59064		565007000000000	0.97154		565007000000000	0.98217		15.717	0.0006831	-9.348	0.00292	-10.004	0.00245		9.16394	0.00285	-4.098	0.00435	-4.17383	0.00332
	802																566284000000000	0.59146		566284000000000	0.97177		566284000000000	0.98233		15.845	0.00153	-9.219	0.00317	-9.87574	0.00289		9.178	0.00284	-3.97	0.00438	-4.10902	0.00333
	803																567560000000000	0.59229		567560000000000	0.972		567560000000000	0.98249		15.973	0.000738876	-9.091	0.00266	-9.74753	0.00291		9.306	0.00279	-3.96572	0.00438	-4.02816	0.00334
	804																568837000000000	0.59311		568837000000000	0.97222		568837000000000	0.98265		16.101	0.00194	-8.963	0.0029	-9.61932	0.00329		9.30952	0.00279	-3.842	0.00442	-3.98094	0.00335
	805																570114000000000	0.59393		570114000000000	0.97244		570114000000000	0.98281		16.23	0.00157	-8.835	0.00299	-9.49111	0.00327		9.435	0.00274	-3.82019	0.00443	-3.88248	0.00336
	806																571391000000000	0.59475		571391000000000	0.97266		571391000000000	0.98296		16.358	0.00094504	-8.707	0.0026	-9.3629	0.00246		9.45511	0.00273	-3.714	0.00446	-3.85286	0.00336
	807																572668000000000	0.59557		572668000000000	0.97288		572668000000000	0.98312		16.486	0.00162	-8.579	0.00335	-9.2347	0.00265		9.60069	0.00267	-3.67465	0.00447	-3.73681	0.00338
	808																573944000000000	0.59638		573944000000000	0.9731		573944000000000	0.98327		16.614	0.00132	-8.451	0.00292	-9.1065	0.00284		9.74627	0.00262	-3.586	0.00449	-3.72479	0.00338
	809																575221000000000	0.5972		575221000000000	0.97331		575221000000000	0.98342		16.742	0.00334	-8.323	0.00339	-8.9783	0.00264		9.89185	0.00256	-3.52912	0.00451	-3.59671	0.00339
	810																576498000000000	0.59801		576498000000000	0.97353		576498000000000	0.98357		16.87	0.00113	-8.195	0.00382	-8.85011	0.00327		10.0374	0.00251	-3.458	0.00453	-3.59113	0.0034
	811																577775000000000	0.59882		577775000000000	0.97374		577775000000000	0.98372		16.998	0.000371716	-8.067	0.00302	-8.72192	0.00275		10.183	0.00246	-3.38358	0.00455	-3.46865	0.00341
	812																579052000000000	0.59963		579052000000000	0.97395		579052000000000	0.98387		17.126	0.00202	-7.939	0.00328	-8.59373	0.00248		10.3286	0.00241	-3.33	0.00456	-3.44546	0.00341
	813																580329000000000	0.60043		580329000000000	0.97416		580329000000000	0.98401		17.254	-0.000449667	-7.811	0.00336	-8.46554	0.00329		10.4742	0.00236	-3.23805	0.00459	-3.34058	0.00343
	814																581605000000000	0.60124		581605000000000	0.97437		581605000000000	0.98416		17.383	0.00203	-7.683	0.00373	-8.33736	0.0027		10.6198	0.00231	-3.202	0.0046	-3.29978	0.00343
	815																582882000000000	0.60204		582882000000000	0.97457		582882000000000	0.9843		17.511	0.00184	-7.554	0.00328	-8.20918	0.00296		10.7653	0.00226	-3.09251	0.00462	-3.21252	0.00344
	816																584159000000000	0.60285		584159000000000	0.97478		584159000000000	0.98444		17.639	0.000405902	-7.426	0.00289	-8.081	0.003		10.9109	0.00222	-3.074	0.00463	-3.15411	0.00345
	817																585436000000000	0.60365		585436000000000	0.97498		585436000000000	0.98458		17.767	0.00239	-7.298	0.00439	-7.95283	0.00345		11.0565	0.00217	-2.94698	0.00466	-3.08446	0.00345
	818																586713000000000	0.60445		586713000000000	0.97518		586713000000000	0.98472		17.895	0.0016	-7.17	0.00412	-7.82466	0.00294		11.2021	0.00213	-2.946	0.00466	-3.00843	0.00346
	819																587990000000000	0.60524		587990000000000	0.97538		587990000000000	0.98486		18.023	0.00184	-7.042	0.00402	-7.69649	0.00324		11.3477	0.00208	-2.818	0.00469	-2.9564	0.00347
	820																589266000000000	0.60604		589266000000000	0.97557		589266000000000	0.985		18.151	0.00167	-6.914	0.00358	-7.56833	0.00337		11.4932	0.00204	-2.80144	0.0047	-2.86276	0.00348
	821																590543000000000	0.60683		590543000000000	0.97577		590543000000000	0.98514		18.279	0.00133	-6.786	0.00335	-7.44017	0.00305		11.6388	0.002	-2.69	0.00472	-2.82835	0.00348
	822																591820000000000	0.60763		591820000000000	0.97596		591820000000000	0.98527		18.407	-8.36292e-05	-6.658	0.00406	-7.31201	0.00322		11.7844	0.00196	-2.65591	0.00473	-2.71708	0.00349
	823																593097000000000	0.60842		593097000000000	0.97616		593097000000000	0.9854		18.535	0.00264	-6.53	0.00333	-7.18385	0.00266		11.93	0.00192	-2.563	0.00475	-2.7003	0.0035
	824																594374000000000	0.60921		594374000000000	0.97635		594374000000000	0.98554		18.663	0.0021	-6.402	0.00484	-7.0557	0.00369		12.0756	0.00188	-2.51037	0.00476	-2.57225	0.00351
	825																595651000000000	0.61		595651000000000	0.97654		595651000000000	0.98567		18.792	0.00107	-6.274	0.00377	-6.92755	0.00318		12.2212	0.00185	-2.435	0.00478	-2.57141	0.00351
	826																596927000000000	0.61078		596927000000000	0.97672		596927000000000	0.9858		18.92	0.000165669	-6.146	0.00487	-6.79941	0.00281		12.3667	0.00181	-2.36484	0.0048	-2.4442	0.00352
	827																598204000000000	0.61157		598204000000000	0.97691		598204000000000	0.98592		19.048	0.00209	-6.018	0.00353	-6.67126	0.00315		12.5123	0.00177	-2.307	0.00481	-2.42573	0.00352
	828																599481000000000	0.61235		599481000000000	0.9771		599481000000000	0.98605		19.176	0.000907092	-5.89	0.0041	-6.54312	0.00344		12.6579	0.00174	-2.2193	0.00483	-2.31616	0.00353
	829																600758000000000	0.61313		600758000000000	0.97728		600758000000000	0.98618		19.304	0.00236	-5.762	0.00369	-6.41498	0.00308		12.8035	0.00171	-2.179	0.00483	-2.28006	0.00354
[truncated: 544 more rows]
